# Supplementary material for: Important miRs of Pathways in Different Tumor Types
Source: PLoS Comput Biol. 2013 Jan 24;9(1):e1002883. doi: 10.1371/journal.pcbi.1002883 (PMC3554575; doi:10.1371/journal.pcbi.1002883)
Supplement: Table S1 — Utilized miR-mRNA interactions. List of all 48,393 interactions between miRs and genes, that have been confirmed by two different sources (M: miRanda, P: PicTar, T: TargetScan). (XLS) [file pcbi.1002883.s008.xls]

## Sheet: human_mir_PTM.dat
Table S1: We show all 48,393 interactions between miRs and genes, that have been confirmed by two different sources (M … miRanda, P ... PicTar, T … TargetScan).
miR	gene	N	source
hsa-miR-27b	SPATA2	2	P T
hsa-miR-19a	NPAS3	3	M P T
hsa-miR-17-5p	KIAA1128	2	P T
hsa-miR-29a	PITPNM2	2	P T
hsa-miR-30c	NR2F2	2	P T
hsa-miR-10a	PUM2	2	P T
hsa-let-7f	CHD9	2	P T
hsa-miR-432	TLN1	2	M T
hsa-miR-503	FAM122A	2	M T
hsa-miR-19a	KIF3A	2	P T
hsa-let-7e	MGAT4A	3	M P T
hsa-miR-133a	ACCN1	2	P T
hsa-miR-92	GOLGA3	2	P T
hsa-miR-200c	MAP4K3	2	P T
hsa-miR-148a	JPH3	2	P T
hsa-miR-148a	CEP350	2	P T
hsa-miR-152	KIAA1324L	3	M P T
hsa-miR-182	GIT2	2	P T
hsa-miR-506	VANGL1	2	M T
hsa-miR-200c	FREM2	2	P T
hsa-miR-135b	EVI5	2	P T
hsa-miR-27b	CD44	2	P T
hsa-miR-92	DTX2	2	P T
hsa-let-7e	RBM9	2	P T
hsa-miR-299-5p	JMJD2A	2	P T
hsa-miR-96	FAM62A	2	P T
hsa-let-7d	ZZZ3	2	M P
hsa-miR-205	DGCR8	2	P T
hsa-miR-198	NLGN2	3	M P T
hsa-miR-30a-5p	C9orf86	2	P T
hsa-miR-19b	ZDHHC7	3	M P T
hsa-miR-606	EPB41	2	M T
hsa-let-7f	BZW1	2	P T
hsa-miR-22	IER5L	2	P T
hsa-miR-133b	NCKIPSD	2	P T
hsa-miR-137	RAB21	2	P T
hsa-miR-367	MEF2D	2	P T
hsa-miR-96	SPAST	2	P T
hsa-miR-613	RSBN1L	2	M T
hsa-miR-32	CDC42	3	M P T
hsa-let-7d	RGS16	2	P T
hsa-miR-218	ACSL1	3	M P T
hsa-miR-219	MYST3	2	P T
hsa-miR-125a	SEMA4C	2	P T
hsa-miR-512-5p	NUDT18	2	M T
hsa-miR-302b	PCDHA5	2	P T
hsa-miR-30b	COTL1	2	P T
hsa-miR-32	FBXW7	2	P T
hsa-miR-607	DCUN1D3	2	M T
hsa-let-7e	CLP1	3	M P T
hsa-miR-181a	TRAK2	2	P T
hsa-miR-125a	MIZF	2	P T
hsa-miR-204	RERE	2	P T
hsa-miR-106b	RUNX1	2	P T
hsa-miR-301	ZNF282	2	P T
hsa-let-7i	SMCR8	2	M P
hsa-miR-30d	FRMPD1	3	M P T
hsa-miR-138	UBP1	2	P T
hsa-miR-342	RAB6C	2	P T
hsa-miR-124	USP38	2	M T
hsa-miR-214	TSPAN18	2	M P
hsa-miR-29a	ARVCF	3	M P T
hsa-miR-196b	SSR1	2	P T
hsa-let-7a	GABPA	2	P T
hsa-miR-647	H1F0	2	M T
hsa-miR-212	ACVR2B	2	M T
hsa-let-7f	PUNC	2	P T
hsa-miR-506	ASCC2	2	M T
hsa-let-7g	DLC1	2	P T
hsa-miR-106b	CHD9	2	P T
hsa-miR-148b	STARD13	2	P T
hsa-miR-106a	C6orf85	2	M T
hsa-miR-15a	ERLIN2	2	P T
hsa-miR-124a	MMD2	2	P T
hsa-miR-153	AKT3	2	P T
hsa-miR-34b	ABCC1	2	P T
hsa-miR-25	RFX1	2	P T
hsa-miR-153	RYR2	2	P T
hsa-miR-15a	LPHN2	2	P T
hsa-miR-498	MGA	2	M T
hsa-let-7d	MAP4K3	3	M P T
hsa-miR-367	ZDHHC5	2	P T
hsa-miR-152	PDIA3	3	M P T
hsa-miR-30d	C15orf40	2	P T
hsa-miR-125a	FAM131B	2	P T
hsa-let-7d	EGR3	2	P T
hsa-miR-452	DGKH	2	M T
hsa-miR-25	RNF38	2	P T
hsa-miR-181c	RNF182	2	P T
hsa-miR-211	SF3B1	2	P T
hsa-let-7i	NME4	3	M P T
hsa-miR-20b	LAPTM4A	3	M P T
hsa-miR-30b	PRRT2	3	M P T
hsa-miR-373	RDBP	2	M T
hsa-miR-26a	CLDND1	2	P T
hsa-miR-135b	PCDHGB6	2	P T
hsa-miR-133b	SASH1	2	P T
hsa-miR-135a	USP15	3	M P T
hsa-let-7i	CYP19A1	2	P T
hsa-miR-21	KCNA1	2	M T
hsa-miR-199a	TSPAN6	2	P T
hsa-miR-19a	SPG20	2	P T
hsa-miR-338	MORF4L1	2	P T
hsa-miR-19a	CCNT2	3	M P T
hsa-miR-128b	ARL8B	2	P T
hsa-miR-26b	MCL1	2	P T
hsa-miR-29b	NAP1L3	3	M P T
hsa-miR-212	PLAGL2	2	P T
hsa-miR-142-3p	AFF2	2	P T
hsa-miR-125b	JUP	2	P T
hsa-miR-211	SOX4	2	P T
hsa-miR-9	NMT1	2	P T
hsa-miR-30e-5p	IKZF2	2	P T
hsa-miR-10b	HAS3	2	P T
hsa-miR-155	CD47	2	P T
hsa-miR-331	GNAZ	2	P T
hsa-miR-26a	YES1	2	P T
hsa-miR-153	GPR124	2	P T
hsa-miR-98	ZNF512B	2	P T
hsa-miR-621	CASZ1	2	M T
hsa-miR-148a	MIER1	3	M P T
hsa-miR-19a	RUNX2	2	M T
hsa-miR-107	BAI1	3	M P T
hsa-miR-30b	MECP2	2	P T
hsa-miR-26b	LSM11	2	P T
hsa-miR-342	FBXL3	2	P T
hsa-miR-302b	FAM117A	2	P T
hsa-let-7b	ACVR1C	2	P T
hsa-miR-30c	NR6A1	3	M P T
hsa-miR-101	DYRK2	2	P T
hsa-miR-96	CD164	2	P T
hsa-miR-23b	CTNNBIP1	3	M P T
hsa-miR-133b	MYCBP2	3	M P T
hsa-miR-22	PRPF38A	3	M P T
hsa-miR-188	MBNL1	2	P T
hsa-let-7a	GOLGA7	2	P T
hsa-miR-20b	BICD2	2	P T
hsa-miR-33	PAPPA	2	P T
hsa-miR-124a	PTPN9	2	P T
hsa-miR-27b	PLEKHJ1	2	P T
hsa-miR-31	UCN2	2	P T
hsa-miR-204	C13orf1	2	P T
hsa-miR-92	SLC24A3	2	P T
hsa-miR-138	LSM14A	2	P T
hsa-let-7i	HDHD1A	2	P T
hsa-miR-182	LPPR4	2	P T
hsa-miR-148b	MAP3K9	2	P T
hsa-miR-19a	VPS37B	2	P T
hsa-miR-149	C19orf22	2	P T
hsa-miR-19b	SLITRK6	2	P T
hsa-miR-186	OTUD4	2	P T
hsa-miR-339	RASSF1	2	P T
hsa-miR-182	CELSR1	2	P T
hsa-miR-98	IRS2	2	P T
hsa-miR-15a	EFNB2	2	P T
hsa-let-7g	ZNF740	2	P T
hsa-miR-185	MAT2A	2	P T
hsa-miR-29a	C14orf43	2	P T
hsa-let-7e	PDGFB	2	P T
hsa-miR-1	SFRS9	3	M P T
hsa-miR-92	IRS2	2	P T
hsa-miR-30e-5p	TMEFF1	2	P T
hsa-miR-200b	LRIG1	2	P T
hsa-miR-15b	HMGA2	2	P T
hsa-let-7d	TUSC2	3	M P T
hsa-let-7g	LRIG3	3	M P T
hsa-miR-200c	CNTN4	2	P T
hsa-miR-200b	RAB11FIP2	2	P T
hsa-miR-613	PIAS3	2	M T
hsa-miR-200c	KIAA1576	2	P T
hsa-miR-9	DSE	2	P T
hsa-miR-195	TLL1	2	P T
hsa-miR-144	ESRRG	2	P T
hsa-miR-219	DMXL1	2	P T
hsa-miR-195	LYPLA2	2	P T
hsa-miR-142-5p	USP46	2	P T
hsa-let-7b	BZW2	2	P T
hsa-miR-199a	ALS2	2	P T
hsa-miR-183	SLC6A6	2	P T
hsa-miR-323	ANKHD1	2	P T
hsa-miR-1	MKRN1	2	P T
hsa-miR-519a	BAHD1	2	M T
hsa-miR-30e-5p	SEMA6A	2	P T
hsa-miR-148b	RAB34	3	M P T
hsa-miR-137	MBNL2	3	M P T
hsa-miR-19b	PTK2B	3	M P T
hsa-miR-544	LMO4	2	M T
hsa-miR-9	ARMCX2	3	M P T
hsa-miR-196a	DDX19A	3	M P T
hsa-miR-375	ZNF281	3	M P T
hsa-miR-195	SOX5	2	P T
hsa-miR-149	CRTC2	3	M P T
hsa-miR-338	DAB2IP	2	P T
hsa-miR-376a	CEBPB	2	M T
hsa-let-7g	DAGLA	2	P T
hsa-let-7i	OLR1	2	P T
hsa-miR-27a	NRIP1	2	P T
hsa-miR-19b	EFNB2	2	P T
hsa-miR-93	VLDLR	3	M P T
hsa-miR-23a	TADA1L	3	M P T
hsa-miR-92	NOMO2	2	P T
hsa-miR-125a	PLK3	2	P T
hsa-miR-22	TRIB2	2	P T
hsa-miR-15b	CRKL	2	P T
hsa-miR-182	FMR1	2	P T
hsa-miR-96	NUAK1	2	P T
hsa-miR-182	CTDSPL	2	P T
hsa-let-7i	RNF20	2	M T
hsa-miR-96	CTDSP1	2	P T
hsa-miR-484	ZNF667	2	M T
hsa-miR-23b	MAB21L2	3	M P T
hsa-miR-29c	PDIK1L	2	P T
hsa-miR-519a	RTN1	2	M T
hsa-let-7f	NOVA1	2	P T
hsa-miR-338	KIAA0256	2	P T
hsa-miR-27a	C7orf41	2	P T
hsa-let-7b	WAPAL	2	P T
hsa-miR-96	TAPT1	2	P T
hsa-let-7i	HIC2	2	P T
hsa-miR-20b	CTDSPL2	2	P T
hsa-miR-765	PUM1	2	M T
hsa-miR-106b	QKI	2	P T
hsa-miR-369-3p	NUP93	2	P T
hsa-miR-299-5p	MARK2	2	P T
hsa-miR-637	BMP1	2	M T
hsa-miR-199b	WNK3	2	P T
hsa-miR-193a	DNAJC13	2	P T
hsa-miR-302d	RORB	2	P T
hsa-miR-563	COL3A1	2	M T
hsa-miR-181b	RBBP7	2	P T
hsa-miR-98	TRIB1	2	P T
hsa-miR-646	PSKH1	2	M T
hsa-miR-497	PPP2R1A	2	M T
hsa-miR-30a-5p	CBFB	2	P T
hsa-miR-32	NOMO3	2	P T
hsa-miR-29a	ABL1	2	P T
hsa-miR-20a	CUGBP2	2	P T
hsa-miR-30c	DDIT4	3	M P T
hsa-miR-29c	FAM123B	3	M P T
hsa-miR-768-3p	BBX	2	M T
hsa-miR-15a	ABCC5	2	P T
hsa-miR-663	PHF15	2	M T
hsa-miR-196a	MECP2	2	P T
hsa-miR-30a-5p	JOSD1	2	P T
hsa-miR-153	CLCN5	3	M P T
hsa-miR-20a	VLDLR	3	M P T
hsa-miR-181a	DCUN1D1	2	P T
hsa-miR-23b	MPP5	2	P T
hsa-miR-663	DPF1	2	M T
hsa-miR-23a	ZNF579	3	M P T
hsa-miR-221	EGFLAM	2	M P
hsa-miR-137	C9orf150	2	P T
hsa-miR-200b	SLK	2	P T
hsa-miR-200c	HBS1L	2	P T
hsa-miR-302d	CLIP4	3	M P T
hsa-miR-223	NFIB	2	P T
hsa-miR-21	PLEKHA1	2	P T
hsa-miR-17-5p	LMO3	2	P T
hsa-miR-30e-5p	RAP1B	2	P T
hsa-miR-200b	SRF	2	P T
hsa-miR-135a	B4GALT5	2	P T
hsa-miR-186	EFEMP1	2	M T
hsa-miR-15a	GRIN1	2	P T
hsa-miR-195	MAPRE1	2	P T
hsa-miR-663	POU3F1	2	M T
hsa-let-7g	HOXC11	2	P T
hsa-miR-206	PPP2R5A	2	P T
hsa-miR-15b	ZCCHC5	3	M P T
hsa-miR-369-3p	PCDHA5	2	P T
hsa-let-7f	KIF2A	2	P T
hsa-miR-32	BTBD12	3	M P T
hsa-miR-124a	PURB	2	P T
hsa-miR-196b	PBX3	2	P T
hsa-miR-148a	ACVR1	2	P T
hsa-miR-193b	RAB6B	2	P T
hsa-miR-27a	RXRA	2	P T
hsa-miR-424	CRSP7	2	M T
hsa-miR-302c	SUV39H1	2	P T
hsa-miR-106b	STC1	2	P T
hsa-miR-15b	PCDHAC2	2	P T
hsa-miR-133a	SGPP1	2	P T
hsa-miR-320	TLK2	2	P T
hsa-miR-326	SEC63	2	P T
hsa-miR-18b	CDC2L6	2	P T
hsa-miR-20b	BNIP2	3	M P T
hsa-miR-30a-5p	PPP2R1B	2	P T
hsa-miR-140	CSK	2	P T
hsa-miR-199b	SLC24A3	2	P T
hsa-miR-302a	EDNRB	2	P T
hsa-miR-302c	MYCN	2	P T
hsa-miR-10a	TMEM168	2	P T
hsa-miR-323	RANBP9	2	P T
hsa-miR-17-5p	ATP2B2	2	P T
hsa-miR-612	C16orf14	2	M T
hsa-miR-30b	RIPK5	2	P T
hsa-miR-29c	C5orf13	3	M P T
hsa-miR-93	EPHA5	2	M P
hsa-let-7b	ARHGEF15	2	P T
hsa-miR-139	PPP3CB	2	P T
hsa-miR-206	VAMP2	2	P T
hsa-miR-30b	PAPD4	2	P T
hsa-miR-129	NR4A2	2	P T
hsa-miR-183	HBEGF	3	M P T
hsa-miR-30b	FAM83F	3	M P T
hsa-miR-149	RAD23A	2	P T
hsa-miR-124a	ACACA	2	P T
hsa-miR-216	POM121	2	P T
hsa-miR-623	TAOK2	2	M T
hsa-miR-30d	RASD1	2	P T
hsa-miR-302c	YWHAZ	2	P T
hsa-miR-181b	FBXO33	2	P T
hsa-miR-29b	KIAA1199	2	P T
hsa-miR-130b	NRP1	2	P T
hsa-miR-128b	RPS6KA5	2	P T
hsa-miR-205	TOP1	2	M P
hsa-miR-155	ETS1	2	P T
hsa-miR-98	PPARGC1A	2	P T
hsa-miR-128b	BCL11A	2	P T
hsa-miR-19b	CHMP4B	3	M P T
hsa-miR-183	RAB11FIP2	2	P T
hsa-miR-20b	FASTK	3	M P T
hsa-miR-182	COL13A1	2	P T
hsa-miR-597	TLX1	2	M T
hsa-miR-331	KCTD15	2	P T
hsa-miR-130a	ABCB7	3	M P T
hsa-miR-23b	WTAP	2	M P
hsa-miR-324-3p	SLC38A2	2	P T
hsa-miR-200b	BCL11B	2	P T
hsa-miR-1	SOX6	3	M P T
hsa-let-7g	DMD	2	P T
hsa-miR-26b	REEP3	2	P T
hsa-miR-302a	ESR1	2	P T
hsa-miR-152	LIN28	2	P T
hsa-miR-20b	KPNA3	2	P T
hsa-miR-29b	AKT3	2	P T
hsa-let-7c	IKBKAP	2	P T
hsa-let-7g	PLAGL2	2	P T
hsa-miR-129-5p	MARCKSL1	2	M T
hsa-miR-15a	NEBL	2	P T
hsa-miR-30c	C20orf108	2	P T
hsa-miR-18b	MESP1	3	M P T
hsa-miR-34b	MOSPD1	2	P T
hsa-miR-190	WSB1	3	M P T
hsa-miR-20b	OCRL	2	P T
hsa-miR-133b	PCGF2	2	P T
hsa-miR-195	MTMR4	2	P T
hsa-miR-133b	BICD2	2	P T
hsa-miR-16	HOXA3	2	P T
hsa-miR-203	SOX6	2	M T
hsa-miR-20a	MLL4	2	P T
hsa-miR-200b	C8orf32	2	P T
hsa-miR-375	MXI1	2	P T
hsa-miR-16	FCHSD2	2	P T
hsa-miR-20a	CAV1	2	P T
hsa-miR-330	GALNT7	2	P T
hsa-miR-29a	MFAP2	3	M P T
hsa-let-7b	CHD7	2	P T
hsa-miR-30c	FRK	2	P T
hsa-miR-24	RALA	2	P T
hsa-miR-32	FUNDC1	2	P T
hsa-miR-135b	BACE1	2	P T
hsa-let-7f	RFXDC1	2	M T
hsa-miR-128b	ELL2	2	P T
hsa-miR-32	SLC44A1	2	P T
hsa-miR-92	GOLGA7	2	P T
hsa-miR-133b	TCF7	2	P T
hsa-miR-20a	MYF5	2	P T
hsa-miR-29a	ZNF524	3	M P T
hsa-miR-204	ELF2	2	P T
hsa-let-7a	DPF2	2	P T
hsa-miR-101	APPBP2	2	P T
hsa-miR-128a	HOXB8	3	M P T
hsa-miR-487a	NSMCE4A	2	M T
hsa-miR-181a	CRIM1	2	P T
hsa-miR-144	MITF	2	P T
hsa-miR-106b	PCDHA5	2	P T
hsa-miR-200c	LRP1B	3	M P T
hsa-miR-15a	KLC2	2	P T
hsa-miR-26a	GNPNAT1	2	P T
hsa-miR-202	RNF13	2	M T
hsa-miR-320	HELZ	2	M T
hsa-miR-211	GABRB3	2	P T
hsa-miR-130b	CLTC	2	P T
hsa-miR-195	SUPT16H	2	P T
hsa-miR-30a-5p	SEMA3A	2	P T
hsa-miR-17-5p	CNOT7	2	P T
hsa-miR-218	SEC61A1	2	P T
hsa-miR-98	SCN5A	2	P T
hsa-miR-182	KHDRBS3	3	M P T
hsa-miR-221	KPNA2	2	M T
hsa-miR-204	DVL3	2	P T
hsa-miR-215	PPP1R3D	2	P T
hsa-miR-30c	NFAT5	2	P T
hsa-miR-29b	GPX7	3	M P T
hsa-miR-26b	LRRTM4	2	P T
hsa-let-7f	ZNF644	2	P T
hsa-miR-30e-5p	SCN2A	2	P T
hsa-miR-125b	SSTR3	2	M P
hsa-miR-20a	YES1	2	P T
hsa-miR-200a	USP19	2	M T
hsa-let-7d	DLST	2	P T
hsa-miR-153	WWP1	2	P T
hsa-miR-96	INA	2	P T
hsa-miR-621	LEF1	2	M T
hsa-miR-138	PSMF1	2	P T
hsa-miR-211	SPATS2	2	P T
hsa-miR-216	ZBTB2	2	P T
hsa-miR-30e-5p	C10orf76	2	P T
hsa-miR-324-3p	PRKACB	2	P T
hsa-miR-32	DDIT4	2	P T
hsa-miR-125a	DIO2	2	P T
hsa-miR-27a	BMPR1A	2	P T
hsa-miR-30b	FRK	2	P T
hsa-miR-20b	SUV420H1	2	P T
hsa-let-7c	TMEM110	2	P T
hsa-miR-299-5p	PBX2	2	P T
hsa-miR-30b	ADAM22	2	M P
hsa-miR-302a	SS18L1	3	M P T
hsa-miR-30e-5p	ANKRA2	2	P T
hsa-miR-514	PPP1CB	2	M T
hsa-miR-30e-3p	VCPIP1	2	P T
hsa-miR-30b	ARF4	2	P T
hsa-miR-23a	DCUN1D5	2	M P
hsa-miR-30b	JMJD1A	3	M P T
hsa-miR-324-3p	TRAF7	3	M P T
hsa-miR-125a	MARK1	2	P T
hsa-miR-20a	CALD1	2	P T
hsa-miR-429	TMEFF2	2	M T
hsa-miR-98	CEP164	2	P T
hsa-miR-30a-5p	EED	2	P T
hsa-miR-25	ARRDC3	2	P T
hsa-miR-200a	SLC20A1	2	M T
hsa-miR-19a	SFRS6	2	P T
hsa-miR-182	SKAP2	2	P T
hsa-miR-34b	FAM49B	3	M P T
hsa-miR-125a	CPEB3	2	P T
hsa-miR-301	SPATA2	2	P T
hsa-miR-206	CENTB2	2	P T
hsa-miR-153	SNCA	2	P T
hsa-miR-98	C10orf6	2	M T
hsa-miR-586	CNBP	2	M T
hsa-miR-15a	SLC20A2	2	P T
hsa-miR-27a	SMARCA1	2	P T
hsa-miR-328	LGR4	2	P T
hsa-miR-640	ING5	2	M T
hsa-miR-128b	PDE7B	2	P T
hsa-miR-200b	PCDH7	2	M P
hsa-let-7b	SMARCC1	2	P T
hsa-miR-137	PTGFRN	2	P T
hsa-miR-326	RUNX3	2	P T
hsa-let-7e	ARHGAP20	2	P T
hsa-miR-141	PHF21A	2	P T
hsa-miR-34c	SYT1	2	P T
hsa-miR-98	SLC26A9	2	P T
hsa-miR-320	PHF1	3	M P T
hsa-miR-135a	TEX2	2	P T
hsa-miR-132	FMR1	2	P T
hsa-miR-125b	TMEM135	2	P T
hsa-miR-514	ZNF289	2	M T
hsa-miR-519a	ITPR1	2	M T
hsa-miR-429	NFIB	2	M T
hsa-miR-98	RNF7	3	M P T
hsa-miR-130b	LYCAT	2	P T
hsa-miR-15a	DEDD	2	P T
hsa-miR-128a	NXF1	2	P T
hsa-miR-29c	ANKRD13C	3	M P T
hsa-miR-190	TNRC6A	2	P T
hsa-miR-124a	NAV3	2	P T
hsa-miR-199a	GPRC5A	2	P T
hsa-miR-342	PFN2	2	P T
hsa-let-7b	COL4A5	2	P T
hsa-miR-144	MYT1	2	P T
hsa-miR-26a	PALMD	3	M P T
hsa-miR-98	EPHA3	2	P T
hsa-miR-218	TMEM178	3	M P T
hsa-miR-330	STAU1	2	P T
hsa-miR-135b	EXOC5	2	P T
hsa-miR-30c	MARCKS	2	P T
hsa-miR-601	NRSN1	2	M T
hsa-miR-92	FOXN2	2	P T
hsa-miR-15b	AXIN2	2	P T
hsa-miR-30e-5p	TAOK1	2	P T
hsa-miR-448	FAM123A	2	M T
hsa-miR-375	JAK2	2	P T
hsa-miR-92	USP44	2	P T
hsa-let-7e	COL4A1	2	P T
hsa-miR-302a	RAB22A	2	P T
hsa-miR-34b	ETS1	2	P T
hsa-miR-29a	TFAP2C	2	P T
hsa-miR-185	NTRK3	2	M P
hsa-miR-302c	RECK	3	M P T
hsa-miR-330	TRIM3	2	P T
hsa-miR-20b	MYO1D	2	P T
hsa-miR-206	SFRS9	3	M P T
hsa-miR-346	KLF4	2	P T
hsa-miR-27a	FAM104A	2	P T
hsa-miR-29c	NAV1	2	P T
hsa-miR-98	PSD3	2	P T
hsa-miR-150	DYRK1A	2	P T
hsa-miR-301	INHBB	2	P T
hsa-miR-132	OSBPL11	2	P T
hsa-miR-30c	ITGA5	2	P T
hsa-miR-377	TFEB	2	M T
hsa-miR-15b	PPM1D	2	P T
hsa-miR-142-5p	ZNF608	2	M T
hsa-miR-153	KCTD1	2	P T
hsa-miR-183	RAB11FIP4	2	P T
hsa-miR-34b	PIAS1	2	P T
hsa-miR-299-5p	SRR	2	P T
hsa-miR-27b	RPN2	2	P T
hsa-let-7e	PRSS22	2	M P
hsa-miR-200c	EVI5	2	P T
hsa-miR-200c	ZEB1	3	M P T
hsa-miR-149	WDR1	2	P T
hsa-miR-101	CCNJ	2	P T
hsa-miR-124a	SLC25A1	2	P T
hsa-miR-19b	RAP1A	3	M P T
hsa-miR-185	AKAP6	2	P T
hsa-miR-222	PCDHA2	2	P T
hsa-miR-133b	MYH9	2	M T
hsa-miR-539	GPHN	2	M T
hsa-miR-142-5p	CDC37L1	2	P T
hsa-miR-17-5p	DIP2A	2	P T
hsa-miR-29b	LSM11	3	M P T
hsa-miR-20b	PAPOLA	2	P T
hsa-miR-30e-5p	GLCE	2	P T
hsa-miR-182	PDZD4	3	M P T
hsa-miR-128b	CPEB4	2	P T
hsa-miR-219	ENPP6	2	P T
hsa-miR-128b	MAN2A1	2	P T
hsa-miR-497	FSD1	2	M T
hsa-miR-96	LAMC1	2	P T
hsa-miR-30a-5p	KCNJ3	2	P T
hsa-miR-32	PCDH11Y	2	P T
hsa-miR-31	ARID1A	3	M P T
hsa-miR-146a	SP8	2	P T
hsa-miR-16	SMAD3	2	P T
hsa-miR-145	LOX	3	M P T
hsa-miR-335	SYN2	2	P T
hsa-miR-192	NOG	2	M P
hsa-miR-106b	HMGA2	2	P T
hsa-miR-29c	KCNIP2	2	P T
hsa-miR-29b	C5orf24	2	P T
hsa-miR-302d	PFN2	2	P T
hsa-miR-105	TM9SF2	2	M T
hsa-miR-299-5p	CNOT3	3	M P T
hsa-miR-30c	C1orf26	2	P T
hsa-miR-132	SOX4	2	P T
hsa-miR-32	DLGAP2	2	P T
hsa-miR-135b	ANXA7	3	M P T
hsa-miR-320	PAN3	3	M P T
hsa-let-7c	ATG16L1	2	P T
hsa-miR-19a	ARRDC3	2	P T
hsa-miR-181a	ZFAND5	2	P T
hsa-miR-183	TMSB4Y	2	P T
hsa-miR-15a	RAD9A	2	M T
hsa-miR-181a	PDIA6	3	M P T
hsa-miR-19a	TNPO2	2	P T
hsa-miR-30a-5p	KRAS	2	P T
hsa-miR-19a	EVI5L	2	P T
hsa-miR-367	DPP10	3	M P T
hsa-let-7d	CTNS	2	P T
hsa-miR-128b	MIER3	2	P T
hsa-miR-563	C15orf21	2	M T
hsa-miR-16	WDTC1	2	P T
hsa-miR-34b	ESRRA	2	P T
hsa-miR-194	EPC2	2	P T
hsa-miR-106b	PCDHA4	2	P T
hsa-miR-650	DEFB119	2	M T
hsa-miR-369-3p	C11orf58	3	M P T
hsa-miR-219	FBXL17	2	P T
hsa-miR-92b	MYLIP	2	M T
hsa-miR-15b	RARB	2	P T
hsa-miR-30e-5p	PPP3CB	2	P T
hsa-miR-140	OSTM1	2	P T
hsa-miR-25	RAP1B	2	P T
hsa-miR-15a	CDC37L1	2	P T
hsa-miR-323	PDCD10	2	P T
hsa-miR-34b	NFAT5	2	P T
hsa-miR-199a	PAN3	2	P T
hsa-miR-138	CCNL2	2	M T
hsa-miR-21	PELI1	3	M P T
hsa-miR-520b	BCL6	2	M T
hsa-miR-204	CDC25B	2	P T
hsa-let-7d	SSH1	2	P T
hsa-miR-618	PURA	2	M T
hsa-miR-30e-5p	CA10	2	P T
hsa-miR-146b	IRAK1	2	P T
hsa-miR-367	FAM76B	2	P T
hsa-miR-218	NPY1R	2	M T
hsa-miR-27b	CCDC92	3	M P T
hsa-miR-182	XPR1	2	P T
hsa-miR-29b	KLF13	2	P T
hsa-miR-198	ABCF2	2	P T
hsa-miR-30a-5p	GALNT2	2	P T
hsa-miR-16	PCDHA4	2	P T
hsa-let-7b	TEAD3	2	P T
hsa-miR-141	RAP2C	3	M P T
hsa-miR-146b	SOX5	2	P T
hsa-miR-101	PTGS2	2	P T
hsa-miR-125a	NCAM2	2	P T
hsa-miR-15b	C20orf46	2	M T
hsa-miR-29c	KIAA1128	2	P T
hsa-miR-200c	TPCN1	2	P T
hsa-miR-128a	RIMS3	2	P T
hsa-let-7f	BTG2	2	P T
hsa-miR-365	KCNJ3	2	M T
hsa-miR-195	C20orf39	2	P T
hsa-miR-98	GGA3	3	M P T
hsa-miR-138	DTX1	2	P T
hsa-miR-27a	LYPD3	3	M P T
hsa-miR-128a	RAB11FIP1	2	P T
hsa-miR-195	ABCC5	2	P T
hsa-miR-27a	STX16	2	P T
hsa-miR-130b	RP5-1022P6.2	2	P T
hsa-miR-135b	VLDLR	3	M P T
hsa-miR-27b	RPS6KA5	3	M P T
hsa-miR-100	HS3ST2	3	M P T
hsa-miR-182	EPHA3	2	P T
hsa-miR-200b	GNAI3	3	M P T
hsa-miR-20a	BCL2L2	2	P T
hsa-miR-376c	SMARCA1	2	M T
hsa-miR-21	ELF2	2	P T
hsa-let-7c	CEECAM1	2	M T
hsa-miR-27a	RPS6KA5	2	P T
hsa-miR-519d	ETF1	2	M T
hsa-miR-30e-5p	URM1	2	P T
hsa-miR-23b	TGFA	2	P T
hsa-miR-30d	JDP2	2	P T
hsa-miR-134	STRBP	2	P T
hsa-miR-372	NTN4	2	P T
hsa-miR-26a	RGS4	2	P T
hsa-miR-17-5p	MAT2B	2	P T
hsa-miR-30a-5p	SPTY2D1	2	P T
hsa-miR-20a	PKD1	3	M P T
hsa-let-7e	COL24A1	2	P T
hsa-miR-96	ARHGEF7	2	P T
hsa-miR-211	TTYH1	2	P T
hsa-miR-16	TMEM87A	2	P T
hsa-miR-148b	EIF2C4	3	M P T
hsa-miR-124a	NXT2	2	P T
hsa-miR-32	CBFA2T3	2	P T
hsa-miR-28	CNTFR	2	P T
hsa-miR-186	PCDHA12	2	P T
hsa-miR-520b	LRP2	2	M T
hsa-miR-22	DTNA	2	P T
hsa-miR-346	NEUROG2	2	P T
hsa-miR-520f	RGMA	2	M T
hsa-miR-195	ERLIN2	2	P T
hsa-miR-128b	REPS1	2	P T
hsa-miR-124a	ITGA11	2	P T
hsa-miR-96	TMEM169	3	M P T
hsa-miR-128a	PDE3A	3	M P T
hsa-miR-30e-5p	PELI1	2	P T
hsa-miR-181c	GOLGA8A	2	M T
hsa-let-7d	RPUSD3	3	M P T
hsa-miR-20a	TMUB2	3	M P T
hsa-miR-129	AP3B1	2	P T
hsa-miR-29c	HAS3	2	P T
hsa-miR-16	TSPAN5	3	M P T
hsa-miR-570	CREBBP	2	M T
hsa-miR-326	ESRRA	3	M P T
hsa-miR-32	FBXO28	2	P T
hsa-miR-200b	PPP4R2	3	M P T
hsa-miR-27a	RARA	3	M P T
hsa-miR-448	RANBP2	2	M T
hsa-miR-26b	KIAA0152	2	P T
hsa-miR-129	STAT5B	2	P T
hsa-miR-29c	TRIB2	2	P T
hsa-miR-24	DCUN1D5	3	M P T
hsa-miR-216	BCL11B	2	P T
hsa-miR-152	FMNL3	2	P T
hsa-miR-19a	AKAP1	2	P T
hsa-miR-150	KCNIP1	2	P T
hsa-miR-137	COCH	3	M P T
hsa-miR-28	TRPS1	2	P T
hsa-miR-203	BCL7A	2	P T
hsa-let-7b	EPHA3	2	P T
hsa-miR-205	PPP1R3A	2	P T
hsa-miR-342	COL2A1	2	P T
hsa-miR-656	CDH11	2	M T
hsa-miR-302c	CDC2L6	2	P T
hsa-miR-641	CAPN12	2	M T
hsa-miR-142-3p	PCGF3	2	P T
hsa-miR-30c	RAPH1	2	P T
hsa-miR-511	GAD2	2	M T
hsa-miR-128a	CA7	2	P T
hsa-miR-128a	LETMD1	2	P T
hsa-miR-9	PHOSPHO1	2	P T
hsa-miR-181b	PHF3	2	P T
hsa-miR-195	PAFAH1B1	2	P T
hsa-miR-577	GRIN2A	2	M T
hsa-miR-148b	NOG	3	M P T
hsa-miR-181d	KLF6	2	M T
hsa-miR-149	FAM57B	2	M T
hsa-let-7i	PAK1	3	M P T
hsa-let-7b	HOXD1	2	P T
hsa-miR-497	HELZ	2	M T
hsa-miR-192	TCF7	3	M P T
hsa-let-7d	CPA4	3	M P T
hsa-miR-22	USP37	2	P T
hsa-miR-106b	NPAS2	2	P T
hsa-miR-203	ZNF281	3	M P T
hsa-miR-128b	MATN3	2	P T
hsa-let-7a	ZNF318	2	P T
hsa-miR-27a	DOT1L	2	P T
hsa-miR-30e-5p	C20orf108	2	P T
hsa-miR-376c	RARB	2	M T
hsa-let-7a	RANBP2	2	P T
hsa-miR-217	DOK6	2	P T
hsa-miR-30a-3p	AP2B1	2	P T
hsa-miR-301	ADCY2	2	P T
hsa-miR-20b	C1orf63	3	M P T
hsa-miR-148a	B4GALT5	2	P T
hsa-miR-153	FAM123A	2	P T
hsa-miR-330	SIN3A	2	P T
hsa-miR-212	KIAA2026	2	M T
hsa-miR-221	ARID1A	3	M P T
hsa-miR-33	NARG1	2	P T
hsa-miR-15b	CAMSAP1	2	P T
hsa-miR-26a	G3BP2	2	P T
hsa-miR-30b	DCX	2	P T
hsa-miR-133a	EVI1	3	M P T
hsa-miR-195	COL24A1	2	P T
hsa-miR-218	ATXN1	2	P T
hsa-miR-139	PSME4	2	P T
hsa-miR-98	COL4A2	3	M P T
hsa-miR-196b	FAM55C	2	P T
hsa-miR-19a	F3	2	P T
hsa-miR-767-3p	PIGU	2	M T
hsa-miR-92	TSSK6	2	P T
hsa-miR-17-5p	ATAD2	2	P T
hsa-miR-27a	FOXP2	2	P T
hsa-miR-339	ZNF770	2	P T
hsa-miR-200b	CDH11	2	P T
hsa-miR-181a	FOS	3	M P T
hsa-miR-26b	EP300	2	P T
hsa-miR-20b	SKI	2	P T
hsa-miR-196b	CCDC47	2	P T
hsa-miR-96	DDAH1	2	P T
hsa-miR-142-3p	FAM44B	3	M P T
hsa-miR-30b	MAP2K4	2	P T
hsa-miR-132	NET1	2	P T
hsa-miR-128b	MEIS2	2	P T
hsa-miR-132	TSC22D3	2	P T
hsa-miR-135b	RAVER2	2	P T
hsa-miR-429	ELAVL4	2	M T
hsa-miR-200b	GABPA	2	P T
hsa-miR-29b	ATRN	2	P T
hsa-miR-218	HMGB1	2	P T
hsa-miR-424	PIB5PA	2	M T
hsa-miR-29a	WDR26	2	P T
hsa-miR-424	EPHA1	2	M T
hsa-miR-302d	RALGDS	2	P T
hsa-miR-98	ANKFY1	2	P T
hsa-miR-301	SPTY2D1	2	P T
hsa-miR-372	DDHD1	3	M P T
hsa-miR-193b	MAP3K3	2	P T
hsa-let-7b	MEF2D	2	P T
hsa-miR-32	VAMP2	2	P T
hsa-miR-124a	MARK1	2	P T
hsa-miR-504	SOHLH1	2	M T
hsa-miR-214	CRY2	2	P T
hsa-miR-200b	FEZ2	2	M T
hsa-miR-17-5p	KLHL20	2	P T
hsa-miR-125b	NRIP1	2	P T
hsa-miR-520h	RABGAP1	2	M T
hsa-let-7i	NCOA3	2	P T
hsa-miR-153	TRPS1	2	P T
hsa-miR-130a	C3orf59	2	P T
hsa-miR-98	SEMA3F	2	P T
hsa-miR-1	SLC16A3	2	P T
hsa-miR-20a	PLS1	2	P T
hsa-miR-9	LDLRAP1	2	P T
hsa-miR-107	ARMCX2	2	M P
hsa-miR-302a	FEM1C	2	P T
hsa-miR-30a-5p	ATXN1	2	P T
hsa-miR-101	ATP1B2	2	P T
hsa-miR-34c	NOTCH2	2	P T
hsa-miR-30d	TUBGCP3	2	P T
hsa-miR-507	OSM	2	M T
hsa-miR-135b	UBOX5	3	M P T
hsa-miR-512-3p	HNRPUL2	2	M T
hsa-miR-27a	SNN	2	P T
hsa-miR-128b	ATP11C	2	P T
hsa-miR-148a	EFNB2	2	P T
hsa-miR-183	RAB21	2	P T
hsa-miR-200b	NR2C2	2	P T
hsa-miR-182	TNS3	2	P T
hsa-let-7b	TTLL4	2	P T
hsa-miR-96	HAS2	2	P T
hsa-miR-195	ESRRA	3	M P T
hsa-miR-145	CSTF3	3	M P T
hsa-miR-218	DOLPP1	2	P T
hsa-miR-96	FEM1C	2	P T
hsa-miR-17-5p	SUV420H1	2	P T
hsa-miR-34c	ANK2	2	P T
hsa-miR-489	UNC5D	2	M T
hsa-let-7d	LGR4	2	P T
hsa-miR-302d	CCNJ	2	P T
hsa-miR-96	FOXF2	3	M P T
hsa-miR-181a	BCL11A	2	M T
hsa-miR-302a	RGMA	2	P T
hsa-miR-106b	MECP2	2	P T
hsa-miR-181d	KLHL5	2	M T
hsa-miR-19b	NME7	3	M P T
hsa-miR-140	DTNA	2	P T
hsa-let-7a	HDHD1A	2	P T
hsa-miR-182	INSIG1	2	P T
hsa-let-7e	GNS	2	P T
hsa-let-7c	CASKIN1	2	P T
hsa-miR-181c	S100PBP	2	P T
hsa-miR-124a	ANKRD13A	2	P T
hsa-let-7g	TMEM110	2	P T
hsa-miR-544	DAPK1	2	M T
hsa-miR-20b	ETV1	2	P T
hsa-miR-142-5p	SON	2	P T
hsa-miR-30e-5p	CNOT6	2	P T
hsa-miR-181a	HSP90B1	3	M P T
hsa-miR-98	DDX19B	3	M P T
hsa-miR-128a	P2RY5	2	P T
hsa-miR-27b	TRIM23	2	M T
hsa-miR-569	LRRC16	2	M T
hsa-let-7b	PNKD	2	P T
hsa-miR-155	VEZF1	2	P T
hsa-miR-199b	EIF5B	2	P T
hsa-miR-19b	CXorf15	2	P T
hsa-miR-204	NELF	2	P T
hsa-miR-326	RIMS4	2	P T
hsa-miR-195	PEX5	2	P T
hsa-miR-106b	KLF11	2	P T
hsa-miR-30d	MEOX2	2	P T
hsa-miR-30b	USP37	2	P T
hsa-miR-182	KCMF1	3	M P T
hsa-let-7a	PGM2L1	2	P T
hsa-miR-216	RFX4	2	P T
hsa-miR-34c	GLCE	2	P T
hsa-miR-130a	PELI1	2	P T
hsa-miR-200c	CDH11	2	P T
hsa-miR-205	BTBD14A	3	M P T
hsa-miR-372	UBFD1	2	P T
hsa-miR-10a	TMEM183B	2	M T
hsa-miR-519d	NAGK	2	M T
hsa-miR-30d	KIAA1622	2	P T
hsa-miR-148a	TMSB10	3	M P T
hsa-miR-15a	NLGN1	3	M P T
hsa-let-7c	P4HA2	2	P T
hsa-miR-302b	WDR37	2	P T
hsa-miR-29c	STX1A	3	M P T
hsa-miR-620	PSMD1	2	M T
hsa-miR-323	2012-09-03	2	P T
hsa-miR-429	LRP1B	2	M T
hsa-miR-20b	WDFY3	2	P T
hsa-miR-214	ITCH	2	P T
hsa-let-7c	HTR4	2	P T
hsa-miR-29b	CDC42	2	P T
hsa-miR-30a-3p	OSBPL6	2	P T
hsa-miR-570	SERBP1	2	M T
hsa-miR-29a	CAMK2G	2	P T
hsa-miR-98	CCNJ	2	P T
hsa-miR-29a	SYT7	2	P T
hsa-let-7i	COL3A1	2	P T
hsa-miR-16	BCL9	2	P T
hsa-miR-372	ETV1	2	P T
hsa-miR-98	C15orf29	2	P T
hsa-miR-181a	LPPR4	2	P T
hsa-miR-369-3p	BAZ2B	3	M P T
hsa-miR-218	TXNDC1	2	P T
hsa-miR-181c	ZIC2	2	P T
hsa-miR-133b	ELAVL1	2	P T
hsa-miR-148a	SLC2A1	2	P T
hsa-miR-381	SMARCB1	2	M T
hsa-miR-142-5p	WDR26	2	P T
hsa-miR-29b	CAV2	2	P T
hsa-miR-101	CADM2	2	P T
hsa-miR-200b	PCDH8	3	M P T
hsa-miR-20a	ARHGAP12	2	P T
hsa-miR-200c	LEMD3	2	P T
hsa-let-7i	ARHGAP20	2	P T
hsa-let-7a	PDPR	2	P T
hsa-miR-320	BANP	3	M P T
hsa-miR-367	DAB2IP	2	P T
hsa-miR-30e-5p	PLCXD3	2	P T
hsa-miR-15b	C9orf5	2	P T
hsa-miR-20a	RAB11FIP1	2	P T
hsa-miR-152	CCKBR	3	M P T
hsa-miR-26b	PFKFB3	2	P T
hsa-miR-182	CACNA2D1	2	P T
hsa-miR-186	CPEB4	2	P T
hsa-miR-767-5p	COL2A1	2	M T
hsa-miR-29c	CLDN1	2	P T
hsa-miR-27a	ACCN2	2	P T
hsa-miR-182	EFNB2	2	P T
hsa-miR-101	CACNB2	3	M P T
hsa-miR-181c	TBPL1	3	M P T
hsa-miR-200b	RAB6IP1	3	M P T
hsa-miR-30d	ZCCHC2	2	P T
hsa-miR-25	DLGAP2	2	P T
hsa-miR-93	RAB6C	2	P T
hsa-miR-383	HNRPH2	2	M T
hsa-miR-93	MARK4	2	M P
hsa-miR-152	ZNRF1	2	P T
hsa-miR-140	TSPAN2	2	P T
hsa-miR-196b	TRERF1	3	M P T
hsa-miR-20b	TNFRSF21	2	P T
hsa-miR-27a	ELL2	2	P T
hsa-miR-129	ELAVL1	2	P T
hsa-miR-155	ZNF238	2	P T
hsa-miR-577	NEK1	2	M T
hsa-miR-137	FLRT3	2	P T
hsa-miR-153	LATS1	2	P T
hsa-miR-124a	CGN	2	P T
hsa-let-7e	HOXA9	2	P T
hsa-miR-137	NBEA	2	P T
hsa-miR-136	MINK1	2	P T
hsa-miR-133b	SEMA5B	2	M T
hsa-miR-30a-5p	ALPK3	2	P T
hsa-miR-186	WNK3	2	P T
hsa-miR-20a	C10orf46	2	P T
hsa-miR-526b	PAQR5	2	M T
hsa-miR-30b	ELMOD2	2	P T
hsa-miR-30b	SOX12	2	P T
hsa-miR-299-5p	CPEB1	2	P T
hsa-miR-19a	CNTFR	3	M P T
hsa-miR-10b	BCL6	2	P T
hsa-miR-335	LONRF1	3	M P T
hsa-miR-302b	HBP1	2	P T
hsa-miR-137	ATOH8	2	P T
hsa-miR-218	FBXL11	2	P T
hsa-miR-217	LIN9	3	M P T
hsa-miR-92	ARID1B	2	P T
hsa-let-7a	MNT	2	P T
hsa-let-7e	NSMCE2	3	M P T
hsa-miR-27a	EPHA4	2	P T
hsa-miR-19a	HDAC4	2	P T
hsa-miR-30b	ATP2A2	2	P T
hsa-miR-185	CHKB	2	P T
hsa-miR-381	ZMYM6	2	M T
hsa-miR-661	XYLT2	2	M T
hsa-miR-19b	RAB21	3	M P T
hsa-let-7c	KTELC1	2	P T
hsa-miR-320	TOMM70A	3	M P T
hsa-miR-200c	MBOAT2	2	P T
hsa-miR-299-5p	ACSL1	2	P T
hsa-miR-27b	ABCB9	2	P T
hsa-miR-195	ZYX	3	M P T
hsa-miR-302a	IL8	2	M P
hsa-miR-29a	ADAM19	2	P T
hsa-miR-330	TFEB	2	P T
hsa-miR-23a	ATP6V1E1	3	M P T
hsa-miR-514	RAB3A	2	M T
hsa-miR-146a	RNF4	2	P T
hsa-miR-367	GFPT2	2	P T
hsa-miR-1	MYST3	2	P T
hsa-miR-148b	ITGA5	2	P T
hsa-miR-103	GTPBP2	2	P T
hsa-miR-16	WDR68	2	P T
hsa-miR-20a	PTPN3	2	P T
hsa-miR-1	OLFML2A	2	P T
hsa-miR-323	KPNA1	2	P T
hsa-miR-128b	KCNK10	2	P T
hsa-miR-146b	STRBP	2	P T
hsa-miR-93	NEUROD1	2	P T
hsa-miR-206	SP2	2	P T
hsa-miR-1	PTPRG	2	P T
hsa-miR-200c	KIAA1432	2	M T
hsa-miR-27a	RASSF5	2	P T
hsa-miR-489	CUGBP1	2	M T
hsa-miR-130b	SASH1	2	P T
hsa-miR-192	DYRK1A	2	P T
hsa-miR-801	UGP2	2	M T
hsa-miR-133a	USP6	2	P T
hsa-miR-125b	MEMO1	2	P T
hsa-miR-92b	NFIB	2	M T
hsa-miR-216	DAZAP1	2	P T
hsa-miR-135a	EVI5	2	P T
hsa-miR-384	PTN	2	M T
hsa-miR-27a	CHD7	2	P T
hsa-miR-302a	BCL2L11	2	P T
hsa-miR-370	ANK3	2	M T
hsa-let-7b	MYCN	2	P T
hsa-miR-186	PCDHAC2	2	P T
hsa-miR-155	KRAS	2	P T
hsa-miR-342	KCTD5	2	P T
hsa-miR-103	AXIN2	3	M P T
hsa-miR-195	TGFBR3	2	P T
hsa-miR-25	GOLGA4	3	M P T
hsa-miR-128a	NAV3	2	P T
hsa-miR-219	LYPLA1	2	P T
hsa-miR-125a	HMGA2	2	P T
hsa-miR-29b	KIAA0355	2	P T
hsa-miR-182	CCNJ	2	P T
hsa-miR-330	APC	2	P T
hsa-let-7a	PRPF38B	2	P T
hsa-miR-152	NARG1	2	P T
hsa-miR-299-5p	MAT2A	2	P T
hsa-miR-100	SLC44A1	2	P T
hsa-miR-30c	ABL1	2	P T
hsa-miR-203	CDH10	2	P T
hsa-miR-203	MAPK9	3	M P T
hsa-miR-15a	SIPA1L2	2	P T
hsa-miR-141	BMP1	2	P T
hsa-miR-203	ATP2B2	2	P T
hsa-miR-15a	CSDE1	2	P T
hsa-miR-301	UCP3	2	P T
hsa-miR-30d	SOX9	2	P T
hsa-miR-196b	CBFA2T3	2	P T
hsa-miR-146a	BCORL1	2	P T
hsa-miR-136	GNG3	3	M P T
hsa-miR-181c	C3orf59	2	P T
hsa-miR-130a	ARHGAP21	3	M P T
hsa-miR-429	TUBB	2	M T
hsa-miR-98	CACNA1D	2	P T
hsa-miR-138	HIF1A	2	P T
hsa-miR-16	SMARCD2	2	P T
hsa-miR-130b	INOC1	2	M T
hsa-miR-181a	MYH10	2	P T
hsa-miR-27b	PLXND1	2	P T
hsa-miR-448	RBM26	2	M T
hsa-miR-557	DLL1	2	M T
hsa-miR-19a	DLX1	2	P T
hsa-miR-125b	DICER1	2	P T
hsa-miR-203	SOCS3	2	P T
hsa-miR-124a	CASC3	2	P T
hsa-miR-30c	DOLPP1	2	P T
hsa-miR-29b	DOLPP1	2	P T
hsa-miR-520f	ARID4A	2	M T
hsa-miR-148a	C16orf70	3	M P T
hsa-miR-338	EN1	2	P T
hsa-miR-96	KLHL2	2	P T
hsa-miR-25	FBN1	2	P T
hsa-miR-144	TMEM55A	2	P T
hsa-miR-211	TRPC5	2	P T
hsa-miR-133a	CDK5R2	2	P T
hsa-miR-133a	MRC2	2	M T
hsa-miR-551b	ZFP36	2	M T
hsa-miR-320	TIAM1	2	M T
hsa-miR-1	MON2	2	M T
hsa-miR-497	RELN	2	M T
hsa-miR-124a	C1orf198	2	P T
hsa-miR-135b	PCDHGC4	2	P T
hsa-miR-206	CCND2	2	P T
hsa-miR-30c	ATG5	2	P T
hsa-miR-149	NR4A3	2	P T
hsa-miR-768-3p	SNX25	2	M T
hsa-let-7a	KLK10	2	M P
hsa-miR-27a	C10orf137	3	M P T
hsa-miR-195	C1orf9	2	P T
hsa-miR-302a	PRRG1	2	P T
hsa-let-7c	RNF44	2	P T
hsa-miR-128b	FOXP2	2	P T
hsa-miR-205	E2F1	3	M P T
hsa-miR-128b	GREM1	2	P T
hsa-miR-96	GNAI3	2	P T
hsa-miR-29c	TRAFD1	2	P T
hsa-miR-30d	TCP11L1	2	P T
hsa-miR-20b	TMEM168	2	P T
hsa-miR-200b	NRIP1	2	P T
hsa-miR-182	TLN1	2	P T
hsa-miR-632	NTNG1	2	M T
hsa-let-7e	YTHDF3	3	M P T
hsa-miR-1	MAP4K3	2	P T
hsa-miR-219	NEK6	2	P T
hsa-miR-30a-5p	RAD23B	2	P T
hsa-miR-181c	GABRA1	3	M P T
hsa-miR-128a	SASH1	2	P T
hsa-miR-194	KLF15	2	P T
hsa-miR-186	SMARCA5	2	M T
hsa-miR-15b	CADM1	2	P T
hsa-miR-622	FAM78B	2	M T
hsa-miR-149	ATP1B4	2	P T
hsa-miR-29b	SNX24	3	M P T
hsa-miR-145	PAPD4	2	P T
hsa-miR-96	WIPI2	2	P T
hsa-miR-569	CSNK1G2	2	M T
hsa-miR-181c	TNFSF11	2	P T
hsa-miR-195	BCL9	2	P T
hsa-miR-24	SCN3A	2	P T
hsa-miR-106b	ZNFX1	3	M P T
hsa-miR-26a	RANBP9	2	P T
hsa-miR-96	GALNT2	2	P T
hsa-miR-625	ARID1A	2	M T
hsa-miR-367	C5orf30	2	P T
hsa-miR-15b	SGK	2	M T
hsa-miR-26b	CCND2	2	P T
hsa-miR-142-3p	CFL2	2	P T
hsa-miR-1	SMAP1	2	P T
hsa-miR-27a	ZEB2	2	P T
hsa-miR-519d	SLC2A4RG	2	M T
hsa-miR-34a	EIF2C4	2	P T
hsa-miR-92	DYRK2	2	P T
hsa-miR-203	TRPS1	2	P T
hsa-miR-106b	PAFAH1B2	2	P T
hsa-miR-124a	EGR2	2	P T
hsa-miR-17-5p	TNKS1BP1	2	P T
hsa-miR-23b	TMOD1	2	P T
hsa-miR-96	TAF15	2	P T
hsa-miR-200b	FAM48A	3	M P T
hsa-miR-335	MAP3K2	2	P T
hsa-miR-92	ARF1	2	P T
hsa-miR-96	RECK	2	P T
hsa-miR-20a	C1orf9	2	P T
hsa-miR-125a	PIK3C2B	2	P T
hsa-miR-34c	PPP2R5A	2	P T
hsa-let-7f	DIAPH2	2	P T
hsa-let-7e	RAVER2	2	P T
hsa-miR-302b	MKNK2	2	M P
hsa-miR-135b	PHF20	2	P T
hsa-miR-195	ODZ2	2	M T
hsa-miR-512-5p	SOX21	2	M T
hsa-miR-30b	PRLR	2	P T
hsa-miR-559	NXF1	2	M T
hsa-miR-514	SCN3A	2	M T
hsa-miR-30d	EPHB2	3	M P T
hsa-miR-32	HECW1	2	P T
hsa-miR-181c	ARNT2	2	P T
hsa-miR-142-5p	ADAMTS5	2	P T
hsa-miR-130b	ASXL2	2	P T
hsa-miR-346	LTBP2	2	P T
hsa-miR-511	FIP1L1	2	M T
hsa-miR-200b	CACNA1C	2	P T
hsa-miR-9	NFKB1	3	M P T
hsa-miR-200c	TSC22D2	2	P T
hsa-miR-19a	RAB21	3	M P T
hsa-miR-27a	KIAA1199	2	P T
hsa-miR-30c	ARL4C	2	P T
hsa-miR-200b	MBNL1	2	P T
hsa-miR-30b	JDP2	2	P T
hsa-let-7g	FZD4	2	P T
hsa-miR-9	RERE	2	P T
hsa-miR-202	ATXN7L2	2	M T
hsa-miR-186	PSPH	3	M P T
hsa-let-7c	TRAPPC1	3	M P T
hsa-miR-606	ACVR1	2	M T
hsa-miR-19b	BTG1	3	M P T
hsa-let-7b	SLAMF6	2	P T
hsa-miR-195	FGF2	2	P T
hsa-miR-206	EIF1AX	2	P T
hsa-miR-27a	2012-09-11	2	P T
hsa-let-7b	SLC9A9	2	P T
hsa-miR-128a	MARCKS	2	P T
hsa-miR-106b	PLXNA1	2	P T
hsa-miR-506	TFEB	2	M T
hsa-miR-30a-5p	ATG5	2	P T
hsa-miR-143	TSC22D3	2	P T
hsa-miR-135a	HCN2	2	M T
hsa-miR-367	CBLN4	2	P T
hsa-let-7i	CD164	2	P T
hsa-miR-520e	CRTC2	2	M T
hsa-miR-519a	EEA1	2	M T
hsa-miR-92	GAP43	2	P T
hsa-miR-29a	APPBP2	2	P T
hsa-miR-98	SYT11	2	P T
hsa-miR-128a	RSBN1	2	P T
hsa-miR-10a	ID4	3	M P T
hsa-miR-375	PHF6	2	P T
hsa-miR-142-5p	BTBD1	2	P T
hsa-miR-140	TTYH2	2	P T
hsa-miR-195	HELZ	2	M T
hsa-miR-367	RAP2C	2	M T
hsa-miR-23b	PITPNA	2	P T
hsa-miR-520b	RAB7A	2	M T
hsa-miR-15b	C9orf150	2	P T
hsa-miR-30c	PAPOLB	2	P T
hsa-miR-206	SLC25A1	2	P T
hsa-miR-372	CREBL1	2	P T
hsa-miR-575	DNAJB14	2	M T
hsa-let-7a	CPEB3	2	P T
hsa-let-7a	SLC16A14	2	P T
hsa-miR-29a	ISL1	3	M P T
hsa-miR-30b	FAM131B	2	P T
hsa-miR-27b	MESDC1	3	M P T
hsa-miR-106b	RSRC2	2	P T
hsa-miR-494	MGA	2	M T
hsa-miR-34b	IQGAP2	2	P T
hsa-miR-106b	UBE2W	2	P T
hsa-miR-19b	LSM12	2	P T
hsa-miR-1	WDR40B	2	P T
hsa-miR-32	SLC7A6	2	P T
hsa-miR-381	ZBTB22	2	M T
hsa-miR-134	STXBP1	2	P T
hsa-miR-124a	PPP2R5E	2	P T
hsa-let-7b	TSC1	2	P T
hsa-miR-134	PGM2L1	2	P T
hsa-miR-22	DNM3	2	P T
hsa-miR-218	WDR26	2	P T
hsa-miR-193a	NRIP1	2	P T
hsa-miR-218	SACS	2	P T
hsa-miR-302b	TMUB2	2	P T
hsa-miR-133b	YES1	2	P T
hsa-miR-206	PLAG1	2	P T
hsa-let-7f	WDR37	2	P T
hsa-miR-155	AZIN1	2	P T
hsa-miR-20b	EPAS1	2	P T
hsa-miR-23b	CCL7	3	M P T
hsa-miR-101	WSB1	2	P T
hsa-miR-30b	DOC2A	3	M P T
hsa-miR-92	COL12A1	2	P T
hsa-miR-204	TCF12	2	P T
hsa-miR-128a	ProSAPiP1	2	P T
hsa-miR-212	CSDE1	2	P T
hsa-miR-603	NEUROD6	2	M T
hsa-miR-103	SNRK	3	M P T
hsa-let-7c	ZC3H3	3	M P T
hsa-miR-19b	PCDHA7	3	M P T
hsa-miR-130b	CHD9	3	M P T
hsa-miR-182	DMRT3	2	P T
hsa-miR-182	VAT1	2	P T
hsa-miR-23a	TGFBR3	2	P T
hsa-miR-768-3p	HNRPU	2	M T
hsa-miR-200c	HLF	2	P T
hsa-miR-26b	ICK	2	P T
hsa-miR-183	SFRS11	2	P T
hsa-miR-218	DAZAP1	2	P T
hsa-let-7f	MTPN	2	P T
hsa-miR-206	TMEM135	2	P T
hsa-miR-125a	ARRDC4	2	P T
hsa-miR-216	NCOA1	2	P T
hsa-miR-206	USP33	2	P T
hsa-miR-30c	KCNMB2	2	P T
hsa-miR-15a	BTRC	2	P T
hsa-miR-130b	CDC2L6	2	P T
hsa-miR-181b	MBOAT2	2	P T
hsa-miR-26b	SAR1B	2	P T
hsa-miR-27a	DNAJC5B	3	M P T
hsa-let-7g	PPARGC1A	2	P T
hsa-let-7e	PPP3CA	2	P T
hsa-miR-205	LIN9	2	P T
hsa-miR-19a	ADCY7	2	P T
hsa-miR-181a	LPP	2	P T
hsa-miR-30b	VKORC1L1	2	P T
hsa-miR-182	SLC33A1	2	P T
hsa-let-7c	LGR4	2	P T
hsa-miR-517b	MORF4L2	2	M T
hsa-miR-9	DTD1	2	P T
hsa-miR-30a-5p	GRK5	2	P T
hsa-miR-506	SGK	2	M T
hsa-miR-15a	CDC42EP2	2	P T
hsa-miR-578	CLCN3	2	M T
hsa-miR-135b	BCL11A	2	P T
hsa-miR-302b	FILIP1L	3	M P T
hsa-miR-324-3p	FZD4	2	P T
hsa-let-7d	SLC25A27	2	P T
hsa-miR-320	BLCAP	2	P T
hsa-miR-137	SRPK1	2	P T
hsa-miR-511	HCN4	2	M T
hsa-miR-30a-3p	PITX2	2	P T
hsa-let-7e	SLC25A18	2	P T
hsa-miR-503	CMPK	2	M T
hsa-miR-182	FAM49B	2	P T
hsa-miR-128b	DKK2	2	P T
hsa-miR-370	OXR1	2	M T
hsa-miR-106b	FBXL3	2	P T
hsa-miR-30b	SEC24A	2	M T
hsa-miR-15a	SCN8A	2	M T
hsa-miR-15a	KIF21A	3	M P T
hsa-let-7e	FBXL12	2	P T
hsa-miR-149	DLG4	2	P T
hsa-miR-21	TAGAP	2	P T
hsa-miR-29a	SMARCC1	2	P T
hsa-miR-214	ZFAND6	2	P T
hsa-miR-29c	RAB40C	2	P T
hsa-miR-155	SLA	2	P T
hsa-miR-98	HOXA9	2	P T
hsa-miR-148b	HSPA4L	2	P T
hsa-miR-30e-3p	ELK3	2	P T
hsa-miR-29c	CCNL2	2	M T
hsa-miR-92	PUS7	2	P T
hsa-miR-186	C5orf24	2	P T
hsa-let-7f	TMED5	2	P T
hsa-miR-124a	BRWD3	2	P T
hsa-miR-135b	ORMDL2	2	P T
hsa-miR-127	ETNK2	2	P T
hsa-miR-103	CHEK1	2	M P
hsa-miR-20a	ZBTB7A	2	P T
hsa-miR-301	CENPO	2	P T
hsa-miR-106a	KIAA0922	2	M T
hsa-miR-144	FBXW11	2	P T
hsa-miR-30c	ERLIN1	2	P T
hsa-miR-9	ADAMTS6	3	M P T
hsa-miR-181b	SS18L1	2	P T
hsa-miR-543	SH2D3C	2	M T
hsa-miR-130b	WEE1	2	P T
hsa-miR-134	CPEB4	2	P T
hsa-miR-505	C18orf34	2	M T
hsa-miR-26a	RYK	2	P T
hsa-miR-515-5p	ID3	2	M T
hsa-miR-320	ZNF281	3	M P T
hsa-let-7g	SLC20A1	2	P T
hsa-miR-658	BRD2	2	M T
hsa-miR-129-3p	PRPF39	2	M T
hsa-miR-17-5p	HECA	2	P T
hsa-miR-15a	BCL9	2	P T
hsa-let-7a	GHR	2	P T
hsa-miR-150	ACTR1A	2	P T
hsa-miR-342	ZNF436	2	P T
hsa-miR-27a	ANTXR2	2	P T
hsa-miR-320	YWHAQ	3	M P T
hsa-miR-30a-5p	FYCO1	2	P T
hsa-miR-27b	HMGB3	2	P T
hsa-miR-34b	ACTL6A	2	P T
hsa-miR-135b	KCNMA1	2	M P
hsa-miR-367	NEUROD1	2	P T
hsa-miR-199a	PRX	2	P T
hsa-miR-133b	LHFP	2	P T
hsa-miR-204	SPATS2	2	P T
hsa-miR-331	SEMA6A	2	P T
hsa-miR-520f	SS18L1	2	M T
hsa-miR-328	SLC39A5	3	M P T
hsa-miR-135b	NDRG4	2	P T
hsa-let-7c	RPUSD2	3	M P T
hsa-let-7f	GALE	3	M P T
hsa-miR-25	GATA6	2	P T
hsa-miR-204	MFSD11	2	P T
hsa-miR-15b	POLR3F	2	M T
hsa-miR-19b	ZFP91	2	P T
hsa-miR-128b	SPTY2D1	2	P T
hsa-miR-153	SAR1B	3	M P T
hsa-let-7f	CRY2	2	P T
hsa-miR-96	ABAT	2	P T
hsa-miR-98	IGF2BP3	2	P T
hsa-miR-34c	PEA15	2	P T
hsa-miR-330	PCDHA6	2	P T
hsa-miR-20a	SIKE	2	P T
hsa-miR-200c	WAPAL	3	M P T
hsa-miR-216	CADM1	2	P T
hsa-miR-128b	RUNX1	2	P T
hsa-miR-562	HIP2	2	M T
hsa-let-7i	CGNL1	2	P T
hsa-miR-424	TBPL1	2	M T
hsa-miR-612	PHF1	2	M T
hsa-miR-21	SEMA3A	2	M T
hsa-miR-181c	RUNX1	2	P T
hsa-miR-429	QKI	2	M T
hsa-miR-181d	C1orf149	2	M T
hsa-miR-16	SFRS11	3	M P T
hsa-miR-182	KLF7	3	M P T
hsa-miR-152	EMX2	2	P T
hsa-miR-124a	GDAP2	2	P T
hsa-miR-302b	DKK1	2	P T
hsa-miR-200c	ASXL1	2	P T
hsa-miR-27b	ORC5L	3	M P T
hsa-miR-30c	EGR3	2	P T
hsa-miR-23b	GREM2	2	P T
hsa-miR-384	ELL3	2	M T
hsa-miR-135b	CHMP4B	3	M P T
hsa-miR-125b	ABCC4	2	P T
hsa-miR-181c	ARL5A	2	P T
hsa-miR-30e-5p	KLHL20	2	P T
hsa-miR-299-5p	KIAA1128	2	P T
hsa-miR-144	NDRG4	2	P T
hsa-miR-506	VAMP3	2	M T
hsa-miR-125b	NCAM2	2	P T
hsa-miR-30e-5p	SSX2IP	2	P T
hsa-miR-200a	FOXP1	2	M T
hsa-let-7f	CDYL	2	P T
hsa-miR-9	SH3BGRL2	2	P T
hsa-miR-26b	FSD1L	2	P T
hsa-miR-24	PSAP	2	P T
hsa-miR-135a	CALN1	3	M P T
hsa-miR-181c	TCERG1	3	M P T
hsa-miR-30c	ELL	2	P T
hsa-miR-200b	ZFAND6	2	P T
hsa-miR-181c	PCDHAC1	2	P T
hsa-miR-302a	FOXL2	2	P T
hsa-let-7b	KLK10	2	M P
hsa-miR-9	FBXL16	2	P T
hsa-miR-19a	PCDHA7	3	M P T
hsa-miR-34a	SPTBN2	2	P T
hsa-let-7e	HIC2	2	P T
hsa-miR-142-5p	FAM131B	2	P T
hsa-miR-132	BRCA1	2	P T
hsa-miR-23a	STX12	2	P T
hsa-miR-149	RGL1	2	P T
hsa-miR-150	PKP4	3	M P T
hsa-miR-17-5p	IL25	2	P T
hsa-miR-183	ANKRD13C	3	M P T
hsa-miR-506	PTBP1	2	M T
hsa-miR-26a	CCDC28A	3	M P T
hsa-miR-27b	KLHDC3	2	P T
hsa-miR-194	TMED2	2	P T
hsa-miR-302b	PPP6C	2	P T
hsa-miR-372	REEP3	2	P T
hsa-miR-7	HPCAL4	2	P T
hsa-miR-20a	ZIC1	2	P T
hsa-miR-30e-3p	CSNK1E	2	P T
hsa-miR-19a	STK38	2	P T
hsa-miR-128b	POU3F2	2	P T
hsa-miR-29b	CA3	2	P T
hsa-miR-34a	PPP1R16B	2	P T
hsa-miR-569	SALL1	2	M T
hsa-miR-211	C1orf144	2	P T
hsa-miR-20b	LIMA1	2	P T
hsa-miR-29a	C14orf138	2	P T
hsa-miR-30d	PCDH19	2	M T
hsa-miR-130b	KIAA0831	2	P T
hsa-miR-765	LRRC8A	2	M T
hsa-miR-518c	BRUNOL4	2	M T
hsa-miR-29b	TMEM65	2	P T
hsa-miR-634	PIK3AP1	2	M T
hsa-miR-29c	HDAC4	2	P T
hsa-miR-24	FREM2	3	M P T
hsa-miR-15a	PBX3	2	P T
hsa-miR-29c	UBE2Q1	2	P T
hsa-miR-578	ST7	2	M T
hsa-miR-320	SRP19	2	M P
hsa-miR-128a	ISL1	2	P T
hsa-miR-145	RIN2	2	P T
hsa-miR-200c	KIAA0423	2	M T
hsa-miR-1	PIM1	2	P T
hsa-miR-650	KIAA1324	2	M T
hsa-miR-199b	RAD23B	2	P T
hsa-miR-204	KLHL13	2	M T
hsa-miR-320	EYA4	2	P T
hsa-miR-27b	STX5	2	P T
hsa-miR-506	DNAJC1	2	M T
hsa-miR-34b	MYRIP	2	P T
hsa-miR-153	PCDHA10	2	P T
hsa-miR-124	SRPK3	2	M T
hsa-miR-181d	ZNF468	2	M T
hsa-miR-150	MRPS27	2	P T
hsa-miR-19b	NEUROD1	3	M P T
hsa-miR-106b	ETV1	2	P T
hsa-miR-27a	APPBP2	2	P T
hsa-miR-607	PCDH19	2	M T
hsa-miR-103	TAF5	3	M P T
hsa-miR-124	MYLK2	2	M T
hsa-miR-155	COPS3	2	P T
hsa-miR-16	FAM38A	2	M T
hsa-miR-619	SYT9	2	M T
hsa-miR-96	SMAD1	2	P T
hsa-miR-200a	MAP2K4	2	M T
hsa-miR-519a	VLDLR	2	M T
hsa-miR-181a	SMAD7	2	P T
hsa-miR-214	SLC9A3R2	2	M T
hsa-miR-17-5p	ENPP5	2	P T
hsa-miR-1	ARF4	2	P T
hsa-miR-376b	MBD5	2	M T
hsa-miR-23b	HOXA11	2	P T
hsa-miR-26a	FBXO11	2	P T
hsa-miR-183	PNOC	2	P T
hsa-miR-381	KIF11	2	M T
hsa-let-7g	MTPN	2	P T
hsa-miR-302b	SLC2A4	2	P T
hsa-miR-34c	CORO1C	2	P T
hsa-miR-137	RP5-1022P6.2	2	P T
hsa-miR-30b	PTPN21	2	P T
hsa-miR-124	PLXNA3	2	M T
hsa-miR-26b	SYCP3	2	P T
hsa-miR-30a-5p	CDH13	2	P T
hsa-miR-193a	SLCO2A1	2	P T
hsa-miR-22	RAB5B	2	P T
hsa-miR-195	USP25	2	P T
hsa-miR-195	FZD10	2	P T
hsa-miR-1	IQSEC2	2	P T
hsa-miR-148a	MMD	2	P T
hsa-miR-32	CIC	2	M P
hsa-miR-20a	DUSP2	2	P T
hsa-miR-23b	TMED7	2	P T
hsa-miR-30b	IKZF2	3	M P T
hsa-miR-105	SNIP1	2	M T
hsa-miR-27a	SOCS6	3	M P T
hsa-miR-141	CD47	2	P T
hsa-miR-141	CSNK2A1	2	P T
hsa-let-7c	RNF38	2	P T
hsa-miR-17-5p	RGMA	2	P T
hsa-miR-181a	CPEB4	2	P T
hsa-miR-32	HMGA2	2	P T
hsa-miR-200b	ERRFI1	3	M P T
hsa-miR-31	HIP2	2	M T
hsa-miR-23a	TRIM63	3	M P T
hsa-miR-27b	WSB1	2	P T
hsa-miR-181b	ARL5A	2	P T
hsa-miR-646	FXR2	2	M T
hsa-miR-329	EGFLAM	2	M T
hsa-miR-27b	SLC35A3	2	P T
hsa-miR-152	DYRK1A	2	P T
hsa-miR-96	WIPF1	2	P T
hsa-miR-23b	TMEM87A	2	M P
hsa-miR-22	IPO7	3	M P T
hsa-miR-494	PSMA1	2	M T
hsa-miR-302d	ZDHHC17	3	M P T
hsa-miR-15b	PPP1R11	3	M P T
hsa-miR-766	RAD23A	2	M T
hsa-miR-32	RAP1A	2	P T
hsa-miR-30a-5p	CUGBP2	2	P T
hsa-miR-15b	PTPN3	2	P T
hsa-miR-98	TAF5	3	M P T
hsa-miR-326	EPHB3	2	P T
hsa-miR-133b	ADCY6	2	P T
hsa-let-7i	NRK	2	P T
hsa-miR-185	RIC8B	2	P T
hsa-miR-15b	PEX5	2	P T
hsa-miR-7	ARF5	2	P T
hsa-miR-19b	LYCAT	2	P T
hsa-miR-200c	NAP1L5	2	P T
hsa-let-7f	TIMM17B	3	M P T
hsa-miR-106b	HLF	2	P T
hsa-miR-188	ZFP91	2	P T
hsa-let-7g	PAK1	2	P T
hsa-miR-9	RBM9	3	M P T
hsa-miR-125b	GAB2	2	P T
hsa-miR-331	NRP2	2	P T
hsa-miR-199b	FZD6	2	P T
hsa-miR-10b	XRN1	2	P T
hsa-miR-145	ACTG1	3	M P T
hsa-miR-132	MEGF11	2	P T
hsa-miR-224	NCOA6	2	M T
hsa-miR-217	CHD9	2	P T
hsa-miR-133a	LASS2	2	P T
hsa-miR-182	TOX	2	P T
hsa-miR-101	NXPH1	2	P T
hsa-miR-26b	SOCS5	2	P T
hsa-miR-137	PHTF2	2	P T
hsa-miR-181a	ADARB1	2	P T
hsa-miR-494	DNAJA2	2	M T
hsa-miR-324-5p	HOXA9	2	M T
hsa-miR-194	NAT13	2	P T
hsa-miR-424	AP1GBP1	2	M T
hsa-miR-32	CPEB4	2	P T
hsa-let-7b	GOLT1B	2	P T
hsa-miR-1	MEA1	3	M P T
hsa-miR-330	ETF1	2	P T
hsa-miR-216	RNF138	2	P T
hsa-miR-20b	FGD1	3	M P T
hsa-miR-30a-3p	SFRP1	2	P T
hsa-miR-128b	INSR	2	P T
hsa-miR-206	DMRT2	2	M P
hsa-miR-27a	AYTL2	2	M T
hsa-miR-196b	ZNF294	2	P T
hsa-miR-182	SLITRK4	3	M P T
hsa-miR-106b	EGLN3	2	P T
hsa-miR-767-5p	HMBOX1	2	M T
hsa-miR-518e	MCF2L	2	M T
hsa-miR-24	HIC2	2	P T
hsa-miR-381	C14orf121	2	M T
hsa-miR-135a	DLGAP2	2	P T
hsa-miR-98	JMJD1A	2	P T
hsa-miR-182	PDZRN4	2	P T
hsa-miR-138	ARRDC3	2	P T
hsa-miR-20b	MINK1	2	P T
hsa-miR-200c	ULK2	2	P T
hsa-miR-30e-3p	KIAA1324L	2	P T
hsa-miR-214	TAF15	3	M P T
hsa-miR-137	TAF12	2	P T
hsa-miR-186	EPN2	2	P T
hsa-miR-372	ABCA1	2	P T
hsa-let-7g	SYT7	2	P T
hsa-miR-181c	CDKN2AIP	3	M P T
hsa-miR-206	NMT2	2	P T
hsa-miR-130a	TARDBP	2	P T
hsa-miR-146b	FUK	2	P T
hsa-miR-135b	TBL1XR1	2	M T
hsa-let-7g	DIAPH2	2	P T
hsa-miR-143	CEP350	2	P T
hsa-miR-302a	ZNF2	2	P T
hsa-miR-196b	CCND2	2	P T
hsa-miR-599	GPR158	2	M T
hsa-miR-144	UBE2D3	2	M T
hsa-miR-196a	ZNF281	2	P T
hsa-let-7a	SEMA4C	3	M P T
hsa-miR-212	PRKD1	2	P T
hsa-let-7f	ATP2A2	3	M P T
hsa-miR-301	NPTN	2	P T
hsa-let-7b	ZNF354A	3	M P T
hsa-miR-128b	UNC5D	2	P T
hsa-miR-10b	USF2	2	P T
hsa-let-7c	LOXL3	2	P T
hsa-miR-30d	CACNB2	3	M P T
hsa-miR-302b	BCL2L11	2	P T
hsa-miR-410	PCDH8	2	M T
hsa-miR-637	KPNB1	2	M T
hsa-miR-195	NEBL	2	P T
hsa-miR-154	COPS2	2	M T
hsa-miR-203	NFIB	2	M T
hsa-miR-92b	LMBR1L	2	M T
hsa-miR-150	ZDHHC18	2	P T
hsa-miR-642	CHST11	2	M T
hsa-miR-133a	SEMA5B	2	M T
hsa-miR-520b	FAM57A	2	M T
hsa-miR-186	GABRA4	2	P T
hsa-miR-200b	TUBB3	2	P T
hsa-miR-215	LRRFIP1	3	M P T
hsa-miR-29b	ZMIZ1	2	P T
hsa-miR-101	SNF1LK2	2	P T
hsa-miR-302a	ASXL2	2	P T
hsa-miR-205	TMSL3	2	P T
hsa-miR-30d	OSBPL8	2	P T
hsa-miR-93	RABGAP1	2	P T
hsa-miR-106b	KLHL2	2	P T
hsa-miR-29a	ANK3	2	P T
hsa-miR-106b	PLAGL2	2	P T
hsa-let-7f	RGAG1	2	P T
hsa-miR-18b	ADD3	2	P T
hsa-miR-29a	MAT2A	2	P T
hsa-miR-381	ZFPM2	2	M T
hsa-miR-135a	PHTF2	2	P T
hsa-miR-557	TMEM16D	2	M T
hsa-miR-125a	PLXNA1	2	P T
hsa-miR-128b	FOXQ1	2	P T
hsa-miR-302b	JAZF1	2	P T
hsa-let-7e	IKZF2	2	M T
hsa-miR-34b	RAB10	2	P T
hsa-miR-302c	MEF2C	2	P T
hsa-miR-34a	PRKACB	2	P T
hsa-miR-106b	TLE4	3	M P T
hsa-miR-29a	SETD8	2	P T
hsa-miR-181c	GPBP1	3	M P T
hsa-miR-183	PIM1	2	P T
hsa-miR-301	ESR1	2	P T
hsa-miR-125a	RAB6B	2	P T
hsa-miR-153	GFPT2	3	M P T
hsa-miR-122a	MAP3K3	2	P T
hsa-miR-136	GRID1	2	M T
hsa-miR-181c	NIPBL	3	M P T
hsa-miR-125a	IER3IP1	2	P T
hsa-miR-181b	C11orf56	2	M T
hsa-miR-135a	PTK2	3	M P T
hsa-miR-27b	XPO1	2	P T
hsa-miR-331	NKIRAS2	2	P T
hsa-miR-30a-5p	HLF	2	P T
hsa-miR-30b	TBC1D15	2	P T
hsa-miR-21	KCNA3	3	M P T
hsa-miR-30a-5p	DNAJC13	2	P T
hsa-miR-135b	ORC5L	3	M P T
hsa-miR-132	ZNF238	3	M P T
hsa-miR-181b	RNF145	2	M P
hsa-miR-302a	OPCML	2	P T
hsa-miR-211	DULLARD	3	M P T
hsa-let-7g	SLC6A1	2	P T
hsa-miR-30c	RAPGEF4	2	P T
hsa-miR-107	BAZ2A	3	M P T
hsa-miR-22	NUDT4	2	P T
hsa-let-7g	TTLL4	3	M P T
hsa-miR-182	CUL5	2	P T
hsa-miR-204	C1orf144	2	P T
hsa-miR-16	LRRFIP2	2	P T
hsa-miR-20b	MTMR3	2	P T
hsa-miR-133b	CSNK1G3	3	M P T
hsa-miR-20a	PEX5L	2	P T
hsa-miR-200b	KCND2	3	M P T
hsa-miR-29c	LARP5	2	M T
hsa-let-7a	ABCC5	3	M P T
hsa-miR-29c	HECW1	2	P T
hsa-miR-30c	RAI14	2	P T
hsa-miR-29a	PARG	2	M T
hsa-miR-29b	SPRY1	2	P T
hsa-miR-301	E2F7	2	P T
hsa-miR-221	ATXN1	2	P T
hsa-miR-101	PPP2R2A	2	P T
hsa-miR-34a	VEZT	2	P T
hsa-miR-211	ROBO1	2	P T
hsa-miR-302b	PCDHA7	2	P T
hsa-miR-148a	SYT1	2	P T
hsa-miR-183	ENAH	2	P T
hsa-miR-183	IDH2	3	M P T
hsa-miR-194	LPHN2	3	M P T
hsa-miR-323	NDEL1	2	P T
hsa-miR-30b	CNTN4	2	P T
hsa-miR-16	ZBTB9	2	P T
hsa-miR-301	SPEN	2	P T
hsa-miR-30c	FOXA1	2	P T
hsa-miR-325	KLHDC8B	2	M P
hsa-miR-27b	SOCS6	3	M P T
hsa-miR-137	SLC6A6	2	P T
hsa-miR-128a	CDC42	2	P T
hsa-miR-181b	PCDHAC1	2	P T
hsa-miR-128b	RARA	2	P T
hsa-miR-106a	APP	2	M T
hsa-miR-19b	TMEM159	2	M P
hsa-miR-30c	KCNJ3	2	P T
hsa-miR-30c	VAT1	2	P T
hsa-miR-106b	PURB	2	P T
hsa-miR-196a	PPP1R16B	2	P T
hsa-miR-29c	ATRN	2	P T
hsa-miR-302c	RGL1	2	P T
hsa-miR-580	SUMO4	2	M T
hsa-miR-153	ABHD13	2	P T
hsa-miR-106b	SSH2	2	P T
hsa-miR-30b	MATR3	2	P T
hsa-miR-612	SMAD6	2	M T
hsa-miR-16	PCBP4	2	M T
hsa-miR-565	YBX2	2	M T
hsa-miR-98	ZNF341	2	M P
hsa-miR-20a	RGL1	2	P T
hsa-miR-211	LSM5	2	P T
hsa-miR-30b	TAOK1	2	P T
hsa-miR-129-3p	NUP98	2	M T
hsa-miR-596	NDUFA4L2	2	M T
hsa-miR-23b	SFRS15	3	M P T
hsa-miR-98	EIF2C3	2	P T
hsa-miR-9	EXTL3	2	P T
hsa-miR-32	TEF	2	P T
hsa-miR-27a	PATZ1	2	P T
hsa-miR-106b	MED12L	2	P T
hsa-miR-34a	AKAP6	2	P T
hsa-miR-330	GTF2H1	2	P T
hsa-miR-15b	KRTAP4-4	2	P T
hsa-miR-34c	PPP1R16B	2	P T
hsa-miR-128a	STK39	2	P T
hsa-miR-34a	TCF12	2	P T
hsa-miR-16	SNX16	2	P T
hsa-let-7g	EIF2C4	2	P T
hsa-miR-30c	ERC2	2	P T
hsa-miR-142-5p	PAPPA	2	P T
hsa-miR-137	JARID1B	2	M T
hsa-miR-433	SESN3	2	M T
hsa-let-7c	POGZ	2	P T
hsa-miR-372	RAB11A	2	P T
hsa-miR-146b	MPPE1	2	P T
hsa-miR-219	TNPO3	2	P T
hsa-miR-26a	PHTF2	2	P T
hsa-let-7i	NME6	2	P T
hsa-miR-562	RSBN1	2	M T
hsa-miR-128b	NGFR	2	P T
hsa-miR-520e	VLDLR	2	M T
hsa-miR-195	LRRFIP2	2	P T
hsa-miR-211	CENTD1	2	P T
hsa-miR-135a	TBK1	3	M P T
hsa-miR-106a	TSHZ3	2	M T
hsa-miR-526b	C9orf9	2	M T
hsa-miR-32	RNF4	2	P T
hsa-miR-182	WIPF1	2	P T
hsa-miR-30e-5p	STAC	2	P T
hsa-miR-125b	BAI1	3	M P T
hsa-miR-96	PCGF5	2	P T
hsa-miR-30d	ZEB2	2	P T
hsa-miR-145	FLNB	2	P T
hsa-miR-144	ARHGAP26	2	P T
hsa-miR-29a	PPP2CA	2	P T
hsa-miR-150	MAP3K12	2	P T
hsa-miR-15a	LTB	2	P T
hsa-miR-17-5p	SLC2A4RG	2	P T
hsa-miR-1	ATP6V0C	2	P T
hsa-miR-148a	OXSR1	2	P T
hsa-miR-101	EED	2	P T
hsa-miR-200b	ARIH2	3	M P T
hsa-miR-125b	ABHD6	2	P T
hsa-miR-200c	RHOA	2	P T
hsa-miR-92	PCTK1	2	P T
hsa-miR-26b	CLTC	2	P T
hsa-miR-29b	SESTD1	3	M P T
hsa-let-7b	LRIG2	3	M P T
hsa-miR-182	STC1	2	P T
hsa-miR-106b	FAM60A	2	P T
hsa-miR-9	CCNE1	2	P T
hsa-miR-330	FNBP4	2	P T
hsa-miR-193a	CD47	2	P T
hsa-miR-768-3p	YTHDC1	2	M T
hsa-miR-125a	PRDM1	2	P T
hsa-miR-138	FOXC1	2	M T
hsa-miR-29a	GOLGA7	2	P T
hsa-miR-30a-5p	SYNGR3	2	P T
hsa-miR-30c	2012-09-07	2	P T
hsa-miR-34a	SATB1	2	P T
hsa-miR-200c	SFRS2	2	P T
hsa-miR-181a	TCERG1	3	M P T
hsa-let-7i	MAP3K3	2	P T
hsa-miR-9	PLEKHA1	2	P T
hsa-miR-181b	LRBA	2	P T
hsa-miR-28	IQSEC2	2	P T
hsa-miR-302a	CXCR4	2	P T
hsa-miR-579	GPBP1	2	M T
hsa-let-7c	PLD3	3	M P T
hsa-miR-142-3p	ROCK2	2	P T
hsa-miR-15b	CTDSPL	2	P T
hsa-miR-148a	CAND1	3	M P T
hsa-miR-32	PTK2	2	P T
hsa-miR-570	CRKL	2	M T
hsa-miR-133a	NUMA1	2	P T
hsa-miR-30d	ELL2	2	P T
hsa-miR-26b	TRPS1	2	P T
hsa-miR-148b	ADCY2	2	P T
hsa-miR-302c	PCDHA7	2	P T
hsa-miR-330	TRIM44	2	P T
hsa-miR-433	CLYBL	2	M T
hsa-miR-203	MEF2C	2	P T
hsa-miR-193a	C14orf4	2	P T
hsa-miR-144	RREB1	2	P T
hsa-miR-26a	TMCC1	2	P T
hsa-miR-124a	ANTXR2	2	P T
hsa-miR-133a	SLC19A2	2	P T
hsa-miR-200c	SAPS3	2	P T
hsa-miR-124a	BCL2L11	2	P T
hsa-miR-194	CHD9	2	P T
hsa-miR-9	TNFRSF21	3	M P T
hsa-miR-507	LHX8	2	M T
hsa-miR-204	PAX2	2	P T
hsa-miR-19b	NLK	2	P T
hsa-miR-181a	EPC2	2	P T
hsa-miR-27b	GTF2I	2	P T
hsa-miR-326	GNAO1	2	P T
hsa-miR-145	ACTR3	3	M P T
hsa-miR-135b	MYEF2	2	P T
hsa-miR-184	CBX6	2	P T
hsa-miR-214	SLC7A8	2	P T
hsa-miR-212	ADAMTS5	2	P T
hsa-miR-23a	CCAR1	2	M T
hsa-miR-219	SLC30A4	2	P T
hsa-miR-217	HIVEP3	2	P T
hsa-miR-302d	UBE2W	2	P T
hsa-miR-196a	USP15	2	P T
hsa-miR-522	FAM114A1	2	M T
hsa-miR-153	SLC44A1	2	P T
hsa-let-7a	SYT7	2	P T
hsa-miR-647	CCDC126	2	M T
hsa-miR-181d	MAMDC2	2	M T
hsa-let-7g	CPEB2	2	P T
hsa-miR-324-3p	EDNRA	2	P T
hsa-miR-365	PKD2L2	2	M T
hsa-miR-15a	RASSF5	2	P T
hsa-miR-515-5p	SPEN	2	M T
hsa-miR-492	ODZ2	2	M T
hsa-miR-19a	CGN	2	P T
hsa-miR-26a	CDH11	2	P T
hsa-miR-34a	SAR1A	2	P T
hsa-miR-635	NDUFA4L2	2	M T
hsa-miR-575	HSD11B2	2	M T
hsa-miR-369-3p	TMEM117	2	P T
hsa-miR-107	KPNA4	2	P T
hsa-miR-103	RAB10	2	P T
hsa-miR-125b	KCNS3	3	M P T
hsa-miR-204	CHN2	2	P T
hsa-miR-93	SNX21	2	P T
hsa-miR-205	KLF12	2	P T
hsa-miR-32	LUZP1	2	P T
hsa-miR-187	TBPL1	2	M P
hsa-miR-106b	CAMK2N1	2	P T
hsa-miR-335	FAM84B	2	P T
hsa-let-7e	ARID3B	2	P T
hsa-miR-183	B3GNT2	2	P T
hsa-miR-543	LRRN1	2	M T
hsa-miR-218	ZNF236	2	P T
hsa-miR-17-5p	ZNF512B	2	P T
hsa-miR-9	PPAPDC2	2	P T
hsa-miR-30a-5p	NRXN3	2	P T
hsa-miR-143	MYO6	2	P T
hsa-miR-153	TP53INP2	2	P T
hsa-miR-25	TRIO	3	M P T
hsa-miR-15b	ZBTB9	2	P T
hsa-miR-92	NARG1	2	P T
hsa-miR-106b	IL17RD	2	P T
hsa-miR-27a	PDE3A	3	M P T
hsa-miR-15a	CUL2	3	M P T
hsa-miR-302a	WEE1	2	P T
hsa-miR-27a	CCDC71	3	M P T
hsa-miR-181b	ZFP36L1	2	P T
hsa-miR-196a	SDCBP	2	P T
hsa-miR-655	DYRK4	2	M T
hsa-miR-302d	TP53INP1	2	P T
hsa-miR-323	SPSB4	2	P T
hsa-miR-30b	USP48	3	M P T
hsa-let-7c	STK40	2	P T
hsa-miR-30e-5p	CCDC97	2	P T
hsa-let-7g	CCR7	2	P T
hsa-miR-600	UCHL1	2	M T
hsa-miR-219	DAZAP1	2	P T
hsa-miR-526b	NRBF2	2	M T
hsa-miR-20b	TMUB2	3	M P T
hsa-miR-34a	EFNB3	2	P T
hsa-miR-367	ZNF287	3	M P T
hsa-miR-488	RAI1	2	M T
hsa-miR-326	CCDC21	2	P T
hsa-miR-32	CPSF6	2	P T
hsa-miR-133b	CCDC117	2	P T
hsa-miR-96	DSCAM	2	P T
hsa-miR-124a	KLC2	2	P T
hsa-let-7a	LRIG3	3	M P T
hsa-miR-30c	NRXN3	2	P T
hsa-miR-142-5p	ZCCHC11	2	M T
hsa-miR-9	FBN2	2	P T
hsa-let-7b	XKR8	3	M P T
hsa-miR-149	FAM104A	2	P T
hsa-miR-211	SLITRK4	2	P T
hsa-miR-30a-5p	C20orf108	2	P T
hsa-miR-101	KCNH7	3	M P T
hsa-miR-34a	CNTNAP1	2	P T
hsa-miR-125a	MFN1	2	P T
hsa-miR-302a	FLT1	2	P T
hsa-let-7a	DIAPH2	2	P T
hsa-miR-148b	SESTD1	2	P T
hsa-miR-135a	SUB1	2	P T
hsa-miR-96	LASS2	2	P T
hsa-miR-103	LRRC55	2	P T
hsa-let-7b	RGS16	2	P T
hsa-miR-152	ARL8B	2	P T
hsa-miR-31	TBXA2R	2	M P
hsa-miR-302d	RSBN1L	3	M P T
hsa-miR-182	TAOK1	2	P T
hsa-miR-383	GABRB3	2	M T
hsa-miR-19b	MYCN	2	P T
hsa-miR-612	PTOV1	2	M T
hsa-miR-103	ECOP	2	P T
hsa-miR-30b	KIAA1370	2	M T
hsa-miR-96	MEF2D	2	P T
hsa-miR-324-3p	PLAG1	2	P T
hsa-miR-375	CTGF	2	P T
hsa-let-7e	OLFM4	2	M P
hsa-miR-224	ZDHHC20	2	M T
hsa-miR-101	MGRN1	2	P T
hsa-miR-200c	CASKIN1	2	P T
hsa-miR-34a	MAPT	2	P T
hsa-miR-181a	CCBL2	2	M P
hsa-miR-369-3p	PCDHA7	2	P T
hsa-miR-26b	SERP1	2	P T
hsa-miR-27a	AFAP1	2	P T
hsa-miR-645	SAE2	2	M T
hsa-miR-182	ARRDC3	2	P T
hsa-miR-302b	CC2D1A	3	M P T
hsa-miR-650	NAB2	2	M T
hsa-miR-30e-3p	CDC40	2	P T
hsa-miR-330	ARMC1	2	P T
hsa-miR-326	RASL10B	2	P T
hsa-miR-106b	TXNIP	2	P T
hsa-miR-138	PFN2	2	P T
hsa-miR-15b	EPHA1	3	M P T
hsa-miR-200a	MYH10	2	M T
hsa-miR-369-3p	WSB1	3	M P T
hsa-miR-1	PAX3	2	P T
hsa-miR-182	NUAK1	3	M P T
hsa-miR-125b	CPSF6	2	P T
hsa-miR-191	TLX3	2	M T
hsa-miR-29a	SHROOM2	2	P T
hsa-miR-342	ARID1B	2	P T
hsa-miR-181c	SLC2A3	2	P T
hsa-miR-335	KLHL28	3	M P T
hsa-miR-301	TNRC6A	2	P T
hsa-miR-587	SLC35F1	2	M T
hsa-miR-302c	UBE2J1	2	P T
hsa-miR-98	MDFI	3	M P T
hsa-miR-23a	CHST7	2	M T
hsa-let-7b	USP21	3	M P T
hsa-miR-342	KLF2	2	P T
hsa-miR-129	TBC1D15	2	P T
hsa-miR-148b	WDR20	2	P T
hsa-miR-214	CRTC2	2	M P
hsa-miR-487a	SEMA3C	2	M T
hsa-miR-20a	CCNJ	2	P T
hsa-miR-29c	COL4A1	3	M P T
hsa-miR-561	ARHGEF3	2	M T
hsa-miR-125b	KIF1B	2	P T
hsa-miR-18b	C5orf30	2	P T
hsa-miR-512-3p	MLL3	2	M T
hsa-miR-30c	TMEM47	2	P T
hsa-miR-433	PCDH11X	2	M T
hsa-miR-10a	BCL6	3	M P T
hsa-miR-137	C7orf28A	3	M P T
hsa-miR-153	TESK2	3	M P T
hsa-miR-647	NRP2	2	M T
hsa-miR-106b	EZH1	2	P T
hsa-miR-193b	CELSR2	2	P T
hsa-miR-302a	GATAD2B	2	P T
hsa-miR-449b	CUEDC1	2	M T
hsa-miR-367	ITGA5	3	M P T
hsa-miR-148a	SNPH	2	P T
hsa-miR-15b	WDTC1	2	P T
hsa-miR-133a	TRAM2	2	P T
hsa-miR-144	CADM2	2	P T
hsa-miR-216	BTBD14B	2	P T
hsa-miR-34b	STRBP	2	P T
hsa-miR-148b	BCL11A	2	P T
hsa-miR-135b	HPS5	2	P T
hsa-miR-302c	FOXJ3	2	P T
hsa-miR-34a	OXSR1	2	P T
hsa-miR-302a	SYNC1	2	P T
hsa-miR-128a	CSF1	3	M P T
hsa-miR-205	ADAMTS9	3	M P T
hsa-miR-181c	FNDC3B	2	P T
hsa-miR-30e-5p	XPO1	2	P T
hsa-miR-429	ASF1A	2	M T
hsa-let-7c	LCOR	2	P T
hsa-miR-185	NFATC3	3	M P T
hsa-let-7g	MGAT4A	3	M P T
hsa-miR-199a	CCNJ	2	P T
hsa-miR-138	GATS	2	P T
hsa-let-7a	CTDSPL2	2	P T
hsa-miR-30a-5p	BCL6	2	P T
hsa-miR-125b	C1orf144	2	P T
hsa-miR-9	HIC2	2	P T
hsa-miR-32	GPR85	2	P T
hsa-miR-26b	SGMS1	2	P T
hsa-miR-96	STX5	2	P T
hsa-miR-96	ANUBL1	2	P T
hsa-miR-30b	SCN2A	3	M P T
hsa-miR-103	LCOR	2	P T
hsa-miR-31	CALCR	2	P T
hsa-miR-137	SLC24A3	3	M P T
hsa-miR-195	PHF20	2	P T
hsa-let-7b	MECP2	2	P T
hsa-miR-302d	SYDE1	2	P T
hsa-miR-409-5p	RNF139	2	M T
hsa-miR-27b	STX16	2	P T
hsa-miR-372	MED12L	3	M P T
hsa-miR-142-3p	MGAT4A	3	M P T
hsa-miR-124	PTPRZ1	2	M T
hsa-miR-20a	PSD	2	P T
hsa-miR-124a	SYNC1	2	P T
hsa-miR-29c	STAG2	2	P T
[truncated: 46,941 more rows]
