# Supplementary material for: Important miRs of Pathways in Different Tumor Types
Source: PLoS Comput Biol. 2013 Jan 24;9(1):e1002883. doi: 10.1371/journal.pcbi.1002883 (PMC3554575; doi:10.1371/journal.pcbi.1002883)
Supplement: Table S3 — Pairs of significantly associated miRs and pathways in ovarian cancer. 322 pathways that were significantly associated to miRs in ovarian cancer. Each pathway is annotated with its leading edge genes and important miRs. P-Values are indicated in parentheses Furthermore, we indicate if a pathway is differentially expressed (DE) with FDR<0.01). (XLS) [file pcbi.1002883.s010.xls]

## Sheet: TableS1.txt
Table S3: 322 pathways that are significantly associated to miRs in ovarian cancer. Each pathway is annotated with its leading edge genes and important miRs. P-Values are indicated in parentheses Furthermore, we indicate if a pathway is differentially expressed (DE) with FDR < 0.01).
pathway	leading edges	DE	important miRs
REACTOME_PHASE_1_FUNCTIONALIZATION	FMO3 CYP3A4 PTGIS PTGS2 MAOA MAOB TBXAS1		hsa-miR-101 (1.8e-18) hsa-miR-144 (1.7e-06) hsa-miR-143 (0.0059)
REACTOME_ACTIVATION_OF_THE_AP1_FAMILY_OF_TRANSCRIPTION_FACTORS	MAPK3 FOS MAPK11 MAPK10		hsa-miR-101 (0.00013)
REACTOME_TRKA_SIGNALLING_FROM_THE_PLASMA_MEMBRANE	CDKN1A PTEN PDPK1 FOXO1 SHC3 SHC2 PIK3R1 PDE1C IRS1 PRKAR1A ADCY2 ADCY8 ITPR1 ITPR2 ADCY9 CALM2 CALM1 AKT3		hsa-miR-130b (1.5e-32) hsa-miR-181b (8.2e-10) hsa-miR-130a (1.3e-09) hsa-miR-203 (2e-09) hsa-miR-301 (7.1e-08) hsa-miR-19a (6.5e-07) hsa-miR-19b (2.5e-06) hsa-miR-183 (0.0007) hsa-miR-32 (0.00091) hsa-miR-367 (0.0088)
REACTOME_MRNA_3_END_PROCESSING	SFRS11 THOC4 NCBP2 NCBP1 PABPN1 UPF3B CPSF3 CPSF1 RBM8A SFRS9 U2AF1 SFRS1 SFRS2 PCF11 CSTF2 RNPS1 CSTF1	*	hsa-miR-802 (8.3e-121) hsa-miR-132 (1.4e-63) hsa-miR-507 (3.5e-51) hsa-miR-134 (1.6e-49) hsa-miR-212 (2.6e-43) hsa-miR-10b (1.4e-34) hsa-miR-10a (6.1e-34) hsa-miR-217 (2.3e-23) hsa-miR-432 (3.8e-14) hsa-miR-190 (4e-08) hsa-miR-133a (0.0038)
REACTOME_SIGNAL_AMPLIFICATION	GNA14 GNA11 PLA2G4A GNG2 GNG7 GNAI1 GNB5 GNG11 P2RY12		hsa-miR-485-3p (4.6e-28) hsa-miR-106a (1.8e-23) hsa-miR-302c (1.5e-18) hsa-miR-106b (2.1e-11) hsa-miR-19a (3.1e-10) hsa-miR-19b (7.6e-09) hsa-miR-20b (4.4e-07) hsa-miR-372 (0.00024) hsa-miR-17-5p (0.0003) hsa-miR-93 (0.0011)
REACTOME_THROMBIN_SIGNALLING_THROUGH_PROTEINASE_ACTIVATED_RECEPTORS	GNA14 GNA11 GNG2 GNG7 GNB5 GNG11		hsa-miR-106a (8e-07) hsa-miR-20b (7.3e-06) hsa-miR-17-5p (0.00029) hsa-miR-372 (0.00092) hsa-miR-106b (0.004)
REACTOME_DOWNSTREAM_EVENTS_IN_GPCR_SIGNALING	AGTR1 AGTR2 PIK3CG SSTR1 RAC1 ARHGEF12 C3 C5 FPR1 MC4R GNA14 GNA11 GNA12 CXCL12 GALR1 NET1 C3AR1 CYSLTR2 CCL5 PTGER2 PTGER4 HRH1 EDN1 C5AR1 CCR6 PPBP CCR2 BDKRB2 ABR GRK5 MCF2L PDPK1 PTGDR AGT PTGFR VIPR2 ADCYAP1R1 TRH CXCR6 FSHR PIK3R1 GNG2 GNG7 ROCK1 GNAI1 ADRB3 NPY5R PENK AVPR1A ARHGEF4 ARHGEF3 ARHGEF6 PDE10A GNB5 GPR65 GNG11 GNG12 DGKB CCL23 CCL21 DGKG PDE1A SOS2 CCL19 NPY1R P2RY12 P2RY13 P2R…		hsa-miR-101 (1.3e-16) hsa-miR-203 (2.3e-09) hsa-miR-23b (2.2e-07) hsa-miR-301 (2.4e-07) hsa-miR-181b (6.7e-07) hsa-miR-92 (8.4e-07) hsa-miR-19b (1.8e-06) hsa-miR-148a (3.2e-06) hsa-miR-130b (1e-05) hsa-miR-506 (9.1e-05) hsa-miR-485-3p (0.0001) hsa-miR-130a (0.00011) hsa-miR-142-5p (0.00074) hsa-miR-96 (0.0017) hsa-miR-375 (0.0053)
REACTOME_ACTIVATION_OF_THE_PRE_REPLICATIVE_COMPLEX	DBF4 ORC1L CDC7 CDC6 POLA2 POLE2 ORC6L CDK2 ORC2L PRIM1 PRIM2 POLE CDT1 MCM10 MCM8 MCM7 MCM2 MCM3 MCM4 MCM5 MCM6	*	hsa-miR-515-5p (1.8e-30) hsa-miR-30b (6.2e-15) hsa-miR-519a (1.1e-07) hsa-miR-30c (5.4e-06) hsa-miR-643 (7.6e-06)
REACTOME_FORMATION_OF_FIBRIN_CLOT_CLOTTING_CASCADE	F8 F9 SERPING1 F5 F3 TFPI KLKB1 PRCP F13A1 PROS1 VWF A2M THBD FGG FGA FGB PF4 F10		hsa-miR-182 (5.6e-28) hsa-miR-101 (1.6e-16) hsa-miR-17-5p (2.3e-09) hsa-miR-20b (2.4e-08) hsa-miR-106b (1.8e-05) hsa-miR-128b (2.7e-05) hsa-miR-19a (0.00011) hsa-miR-335 (0.0003) hsa-miR-144 (0.00044) hsa-miR-20a (0.0014)
REACTOME_PI3K_CASCADE	FGF7 FGF2 KL PIK3R1 INSR IRS1		hsa-miR-27b (2.5e-12) hsa-miR-183 (0.00056) hsa-miR-199a (0.0014) hsa-miR-155 (0.0015) hsa-miR-199b (0.0017)
REACTOME_CHOLESTEROL_BIOSYNTHESIS	PMVK DHCR7 GGPS1 EBP MVK HMGCS1 SQLE TM7SF2 DHCR24 LSS		hsa-miR-133a (0.0064)
REACTOME_THE_ROLE_OF_NEF_IN_HIV1_REPLICATION_AND_DISEASE_PATHOGENESIS	RAC1 AP2B1 AP2A2 FYN AP1S2 AP1G1 DOCK2 HCK AP1B1 CD247		hsa-miR-130b (1.4e-13) hsa-miR-130a (3.4e-06) hsa-miR-101 (0.00015) hsa-miR-485-3p (0.00042)
REACTOME_EFFECTS_OF_PIP2_HYDROLYSIS	DGKB ITPR1 ITPR2 MGLL		hsa-miR-19b (2.1e-11) hsa-miR-92 (2.5e-11) hsa-miR-142-5p (1.3e-07) hsa-miR-203 (1.9e-07) hsa-miR-130a (2.6e-07) hsa-miR-367 (2.7e-05) hsa-miR-32 (4.2e-05) hsa-miR-106b (5.2e-05) hsa-miR-20a (0.00031) hsa-miR-130b (0.00046) hsa-miR-16 (0.0014) hsa-miR-19a (0.0051) hsa-miR-301 (0.0082)
REACTOME_PLATELET_ACTIVATION_TRIGGERS	GNA14 GNA11 PLA2G4A PDPK1 FYN PIK3R1 GNG2 GNG7 GNAI1 GNB5 GNG11 P2RY12 AKT3		hsa-miR-203 (7.1e-12) hsa-miR-15a (2.1e-08) hsa-miR-583 (4.4e-06) hsa-miR-106b (1.7e-05) hsa-miR-375 (3.7e-05) hsa-miR-485-3p (4e-05) hsa-miR-106a (0.00019) hsa-miR-302a (0.00032) hsa-miR-302c (0.00036) hsa-miR-19a (0.0017) hsa-miR-181b (0.0028) hsa-miR-19b (0.0032) hsa-miR-16 (0.0042) hsa-miR-20a (0.0051) hsa-miR-372 (0.0055)
REACTOME_VIRAL_MRNA_TRANSLATION	RPLP0 DNAJC3 RPS27A RPL10A GRSF1 RPL13A RPL18 RPL19 RPL14 RPL13 RPL15 RPL10 RPL11 RPL12 RPS14 RPS15 RPS13 RPS25 RPS27 RPS23 RPS24 RPS9 RPS6 RPS5 RPS8 RPL41 RPL3L RPL36 RPL34 RPL26 RPL27 RPL28 RPL23 RPL21 RPL6 RPL9 RPL3 RPL5 RPL4 RPL7A RPL23A RPS3A RPS4X RPS15A		hsa-miR-142-5p (7.6e-13) hsa-miR-137 (9e-09) hsa-miR-376a (7.4e-08) hsa-miR-376b (0.0002)
REACTOME_PROSTANOID_HORMONES	DPEP2 PTGES3 PTGIS LTA4H PTGS2 LTC4S TBXAS1		hsa-miR-101 (3.3e-23) hsa-miR-144 (8.3e-05) hsa-miR-143 (0.01)
REACTOME_TRANSPORT_OF_MATURE_MRNA_DERIVED_FROM_AN_INTRON_CONTAINING_TRANSCRIPT	RAE1 SFRS11 THOC4 NUP107 NCBP2 NCBP1 SEH1L TPR NUP160 NUP155 AAAS UPF3B NUP205 NUP214 NUP210 NUP85 NUP98 NUP93 U2AF2 SFRS6 SFRS5 RBM8A SFRS9 U2AF1 NUP35 SFRS1 SFRS3 SFRS2 NUP43 NUP62 MAGOH NUPL2 RNPS1 POM121	*	hsa-miR-132 (1.7e-37) hsa-miR-802 (4.1e-36) hsa-miR-212 (6e-25) hsa-miR-10a (7.7e-19) hsa-miR-134 (8.8e-16) hsa-let-7b (2.1e-08) hsa-miR-216 (3.9e-07) hsa-miR-432 (4.2e-07) hsa-miR-21 (4.8e-07) hsa-miR-10b (9.6e-06) hsa-miR-342 (0.00015) hsa-miR-217 (0.0002) hsa-miR-193a (0.0008) hsa-let-7g (0.00098) hsa-miR-381 (0.0044) hsa-miR-190 (0.0091)
REACTOME_AMINO_ACID_TRANSPORT_ACROSS_THE_PLASMA_MEMBRANE	SLC7A9 SLC38A1 SLC38A2		hsa-miR-30c (5.2e-05)
REACTOME_REGULATION_OF_BETA_CELL_DEVELOPMENT	FOXA2 RPS27A RPL10A RPL13A FOXO1 RPL18 RPL19 RPL13 RPL15 RPL10 RPL11 RPL12 RPS15 RPS13 RPS25 RPS23 RPS6 RPS5 HNF1B HNF1A RPL36 RPL34 RPL26 RPL27 RPL23 RPL21 NR5A2 RPL3 RPL5 RPL7A RPL23A RPS3A RPS4X FGF10 AKT3		hsa-miR-375 (1.1e-13) hsa-miR-142-5p (3.1e-10) hsa-miR-203 (7e-06) hsa-miR-106b (7.3e-06) hsa-miR-376a (1.2e-05) hsa-miR-16 (0.00062) hsa-miR-17-5p (0.00066) hsa-miR-137 (0.00072) hsa-miR-101 (0.001) hsa-miR-27b (0.001) hsa-miR-124a (0.0011) hsa-miR-20b (0.0017) hsa-miR-181b (0.0034)
REACTOME_INSULIN_SYNTHESIS_AND_SECRETION	RPLP0 SRP14 RPS27A VAMP2 RPL10A SEC11C SEC11A STXBP1 RPL13A SPCS1 RPL18 RPL19 RPL14 RPL13 RPL15 RPL10 RPL11 RPL12 RPS14 RPS15 RPS13 GNAI2 GNAI1 RPS25 RPS27 RPS23 RPS24 RPS9 RPS6 RPS5 RPS8 RPL41 RPL3L RPL36 PCSK2 RPL34 RPL26 RPL27 RPL28 RPL23 RPL21 SSR3 RPL6 RPL9 RPL3 RPL5 RPL4 RPL7A RPL23A RPS3A RPS4X RPS15A GNAO1 CPE SLC30A5		hsa-miR-19a (1.4e-12) hsa-miR-485-3p (9.7e-11) hsa-miR-16 (5.8e-06) hsa-miR-142-5p (6.4e-06) hsa-miR-203 (1.2e-05) hsa-miR-19b (1.3e-05) hsa-miR-9 (4.5e-05) hsa-miR-137 (0.00035) hsa-miR-32 (0.0009) hsa-miR-376a (0.0013) hsa-miR-214 (0.0075)
REACTOME_GLYCOGEN_BREAKDOWN_GLYCOGENOLYSIS	PHKB PGM2 PYGM CALM2 CALM1		hsa-miR-130b (3.6e-13) hsa-miR-301 (9.7e-08) hsa-miR-130a (2.9e-05) hsa-miR-770-5p (0.0048)
REACTOME_CAM_PATHWAY	PRKACB PDE1C PDE1A PRKAR1A ADCY4 ADCY2 ADCY8 ADCY9 CALM2 CALM1		hsa-miR-130a (1.6e-50) hsa-miR-19a (7.6e-29) hsa-miR-130b (3.2e-11) hsa-miR-301 (3.4e-11) hsa-miR-206 (1.6e-08) hsa-miR-19b (2.1e-08) hsa-miR-182 (5.6e-07) hsa-miR-181b (6.6e-07) hsa-miR-96 (0.0005)
REACTOME_GLYCOLYSIS	PGAM2 PKM2 PFKP PFKM GAPDH PFKFB4 PFKFB1 TPI1 PGK1 ENO2 ENO3 ENO1 GPI	*	hsa-miR-133a (0.00021)
REACTOME_AKT_PHOSPHORYLATES_TARGETS_IN_THE_CYTOSOL	CDKN1A PDPK1 AKT3		hsa-miR-203 (0.00026) hsa-miR-375 (0.0011)
REACTOME_RETROGRADE_NEUROTROPHIN_SIGNALLING	SH3GL2 AP2B1 AP2A2 DNAL4		hsa-miR-203 (1.1e-12) hsa-miR-16 (6.7e-05)
REACTOME_BILE_SALT_AND_ORGANIC_ANION_SLC_TRANSPORTERS	SLC13A5 SLC13A2 SLC13A3 SLC47A1 SLC47A2 SLC16A7 SLC10A6		hsa-miR-16 (0.002)
REACTOME_G_ALPHA_12_13_SIGNALLING_EVENTS	RAC1 ARHGEF12 GNA12 NET1 ABR MCF2L PIK3R1 ROCK1 ARHGEF4 ARHGEF3 ARHGEF6 SOS2 RASGRF1 RHOA AKAP13		hsa-miR-130b (1.2e-14) hsa-miR-101 (0.0001) hsa-miR-19b (0.00018) hsa-miR-301 (0.00031) hsa-miR-218 (0.0078)
REACTOME_SYNTHESIS_AND_INTERCONVERSION_OF_NUCLEOTIDE_DI_AND_TRIPHOSPHATES	AK2 NME4 NME1 RRM2 CTPS2 CTPS DTYMK GUK1		hsa-let-7i (1.1e-07) hsa-miR-124 (0.002)
REACTOME_POST_TRANSLATIONAL_PROTEIN_MODIFICATION	GAS6 PROS1 F10 PIGK PIGH PIGB PIGV PIGS PIGP		hsa-miR-302a (8.3e-12) hsa-miR-587 (0.00026)
REACTOME_EGFR_DOWNREGULATION	SH3GL2 STAM2 SPRY2 SPRY1 AP2B1 AP2A2 EGFR		hsa-miR-203 (4.3e-08) hsa-miR-142-5p (2.2e-05) hsa-miR-23b (0.00023)
REACTOME_GPCR_LIGAND_BINDING	AGTR1 AGTR2 SSTR1 IHH C3 C5 FPR1 MC4R CXCL12 GALR1 C3AR1 CYSLTR2 CCL5 PTGER2 PTGER4 HRH1 EDN1 C5AR1 CCR6 PPBP CCR2 BDKRB2 PTGDR AGT PTGFR PTCH1 VIPR2 WNT2 WNT4 ADCYAP1R1 TRH CXCR6 FSHR GNG2 GNG7 ADRB3 NPY5R PENK AVPR1A GNB5 GPR65 GNG11 GNG12 CCL23 CCL21 CCL19 NPY1R P2RY12 P2RY13 P2RY10 P2RY14 NMBR HTR2B HTR2A GPR44 RLN2 DRD1 XCL1 XCL2 MTNR1A CCRL1 ADRB2 CHRM1 PF4 ANXA1 CX3CR1 POMC EDNRA EDNRB FZD…		hsa-miR-23b (1.8e-10) hsa-miR-203 (1.9e-09) hsa-miR-302a (2.4e-05) hsa-miR-218 (3.1e-05) hsa-miR-130b (4.5e-05) hsa-miR-130a (0.0001) hsa-miR-101 (0.00021) hsa-miR-19b (0.0011) hsa-miR-9 (0.0012) hsa-miR-106b (0.0041) hsa-miR-506 (0.005) hsa-miR-372 (0.0056) hsa-miR-32 (0.0082)
REACTOME_SIGNALING_BY_BMP	BMPR2 GREM2 UBE2D1 BMPR1B FSTL1 CER1 ZFYVE16 BMP2 SMAD9 SMAD4 SMAD1		hsa-miR-106b (1.2e-11) hsa-miR-23b (1.2e-11) hsa-miR-369-3p (1.4e-11) hsa-miR-130b (6.2e-11) hsa-miR-130a (3.8e-10) hsa-miR-142-5p (2.3e-09) hsa-miR-101 (3e-09) hsa-miR-144 (3.2e-06) hsa-miR-301 (2.3e-05) hsa-miR-96 (8.5e-05) hsa-miR-19b (0.0003) hsa-miR-19a (0.00045) hsa-miR-137 (0.0033) hsa-miR-181b (0.0042) hsa-miR-375 (0.005)
REACTOME_INTEGRIN_CELL_SURFACE_INTERACTIONS	BSG ICAM2 AMICA1 ITGAL ITGAE ITGB4 ITGB3 ITGAM ITGAV ITGB6 ITGA2 ITGA4 ITGA6 ITGA8 RAP1A VWF APBB1IP FGG FGA FGB JAM2 JAM3 CDH1 VCAM1 COL4A4 FBN1 COL4A5 RAPGEF4 LAMA2 RASGRP3 RASGRP2		hsa-miR-130b (2.8e-11) hsa-miR-203 (1.3e-10) hsa-miR-130a (1.7e-06) hsa-miR-92 (1.1e-05) hsa-miR-19b (6.4e-05) hsa-miR-301 (0.00016) hsa-miR-16 (0.00037) hsa-miR-19a (0.00093) hsa-miR-30a-5p (0.003) hsa-miR-32 (0.0034) hsa-miR-23b (0.0048) hsa-miR-218 (0.0057)
REACTOME_PEPTIDE_CHAIN_ELONGATION	RPLP0 RPS27A RPL10A RPL13A EEF1A1 RPL18 RPL19 RPL14 RPL13 RPL15 RPL10 RPL11 RPL12 RPS14 RPS15 RPS13 RPS25 RPS27 RPS23 RPS24 RPS9 RPS6 RPS5 RPS8 RPL41 RPL3L RPL36 RPL34 RPL26 RPL27 RPL28 RPL23 RPL21 EEF2 RPL6 RPL9 RPL3 RPL5 RPL4 RPL7A RPL23A RPS3A RPS4X RPS15A		hsa-miR-137 (8.9e-23) hsa-miR-376a (4.3e-13) hsa-miR-142-5p (6.9e-11) hsa-miR-376b (1.2e-07) hsa-miR-542-3p (8.7e-05)
REACTOME_POST_NMDA_RECEPTOR_ACTIVATION_EVENTS	PDPK1 PRKACB CAMK2D NEFL RPS6KA6 RPS6KA2 RASGRF1 ADCY8 CALM2 CALM1		hsa-miR-130b (5.4e-36) hsa-miR-301 (5.5e-17) hsa-miR-130a (6e-11) hsa-miR-31 (7.6e-09) hsa-miR-27b (4.5e-08) hsa-miR-770-5p (5.9e-06) hsa-miR-19a (1.2e-05) hsa-miR-18a (9.7e-05) hsa-miR-25 (0.00014) hsa-miR-96 (0.0002) hsa-miR-136 (0.00099) hsa-miR-375 (0.0021) hsa-miR-200c (0.0033)
REACTOME_ELONGATION_AND_PROCESSING_OF_CAPPED_TRANSCRIPTS	CCAR1 SFRS11 DHX9 YBX1 THOC4 SF3B1 SF3A3 TXNL4A NCBP2 NCBP1 SNRPD3 SNRPD1 SNRPD2 PABPN1 PRPF4 PRPF6 SF3B14 FUS SUPT16H TH1L LSM2 UPF3B GTF2H4 TCEB3 TCEB1 SNRPA1 HNRNPA2B1 SNRPB2 HNRNPL HNRNPC WHSC2 CPSF3 CPSF1 RBM8A SFRS9 U2AF1 SUPT5H SFRS1 SFRS2 PCF11 ELL CCNT1 POLR2H POLR2G POLR2K POLR2J POLR2D SF4 SNRPB SNRPF SNRPE SNRPG CSTF2 RNPS1 CSTF1	*	hsa-miR-802 (7.9e-96) hsa-miR-134 (3.3e-70) hsa-miR-132 (1.5e-68) hsa-miR-212 (4.2e-35) hsa-miR-507 (5.8e-22) hsa-miR-10a (5.5e-19) hsa-miR-495 (3.6e-18) hsa-miR-190 (3.4e-14) hsa-miR-10b (8.2e-12) hsa-miR-432 (1.2e-10) hsa-miR-15a (3.9e-10) hsa-miR-200a (3.3e-08) hsa-miR-217 (7.7e-08) hsa-miR-193a (3.7e-07) hsa-miR-133a (1.4e-05) hsa-miR-30b (0.00049) hsa-miR-216 (0.00076) hsa-miR-338 (0.0034) h…
REACTOME_METABOLISM_OF_NITRIC_OXIDE	NOSTRIN CAV1 CALM2 CALM1 HSP90AA1		hsa-miR-130b (4.8e-21) hsa-miR-130a (1.9e-07) hsa-miR-770-5p (2.7e-07) hsa-miR-106b (6.5e-06) hsa-miR-301 (8.4e-06) hsa-miR-199b (2.3e-05) hsa-miR-199a (9.2e-05) hsa-miR-561 (0.0004) hsa-miR-96 (0.005)
REACTOME_SLC_MEDIATED_TRANSMEMBRANE_TRANSPORT	SLC20A2 SLC8A1 SLC13A5 SLC1A7 SLC1A1 SLC43A2 SLC7A11 SLC41A1 SLC47A1 SLC47A2 SLC26A2 SLC24A4 SLC24A3 SLC24A1 SLC26A4 SLC16A7 SLC39A8 SLC39A6 SLC44A1 SLC44A3 SLC44A4 SLC7A8 SLC2A7 SLC2A4 SLC40A1 SLC6A14 SLC7A2 SLC12A4 SLC2A13 SLC32A1 SLC15A2 SLC6A1 SLC6A2 SLC30A5 SLC17A8		hsa-miR-23b (1.2e-08) hsa-miR-375 (4.5e-08) hsa-miR-130a (2e-05) hsa-miR-301 (0.00015) hsa-miR-218 (0.00026) hsa-miR-96 (0.0076) hsa-miR-137 (0.0094)
REACTOME_P53_INDEPENDENT_DNA_DAMAGE_RESPONSE	CDC25A PSMD14 PSMD12 PSMA6 PSMA5 PSMA4 PSMA7 PSMB5 PSMB4 PSMB2 PSMC4 PSMC2 PSMD1 PSMD2 PSMD4 PSME2	*	hsa-miR-132 (4.9e-63) hsa-miR-802 (3.3e-16) hsa-miR-212 (5.8e-13) hsa-let-7i (1e-10) hsa-miR-765 (3.8e-07) hsa-miR-21 (1e-06) hsa-let-7c (9.9e-06) hsa-miR-507 (0.00013) hsa-let-7e (0.00013) hsa-let-7f (0.00021) hsa-miR-620 (0.00051) hsa-miR-98 (0.0011) hsa-let-7g (0.0048)
REACTOME_NEP_NS2_INTERACTS_WITH_THE_CELLULAR_EXPORT_MACHINERY	RAE1 NUP107 RAN SEH1L TPR NUP160 NUP155 AAAS NUP205 NUP214 NUP210 XPO1 NUP85 NUP98 NUP93 NUP35 NUP43 NUP62 NUPL2 POM121		hsa-miR-212 (1.4e-33) hsa-miR-132 (7.6e-25) hsa-miR-342 (1.7e-13) hsa-miR-216 (3e-09) hsa-miR-21 (4.8e-08) hsa-let-7g (2.7e-07) hsa-let-7c (3.5e-07) hsa-miR-514 (7.8e-07) hsa-let-7b (2.8e-06) hsa-miR-320 (8.6e-06) hsa-miR-30b (4.3e-05) hsa-let-7f (4.7e-05) hsa-let-7i (5.2e-05) hsa-let-7e (0.002)
REACTOME_TRANSLOCATION_OF_ZAP70_TO_IMMUNOLOGICAL_SYNAPSE	HLA-DQA2 HLA-DQA1 HLA-DRA HLA-DOA HLA-DQB1 TRA@ HLA-DMB HLA-DMA CD3G CD3D HLA-DPA1 HLA-DRB5 HLA-DPB1 LCK CD247		hsa-miR-214 (4.8e-29)
REACTOME_NUCLEOTIDE_EXCISION_REPAIR	LIG1 ERCC6 PCNA GTF2H4 POLE2 POLD1 POLE RFC5 RFC3 RFC4 RFC2 POLR2H POLR2G POLR2K POLR2J POLR2D		hsa-miR-134 (1.1e-31) hsa-miR-154 (7.2e-14) hsa-miR-217 (0.00014) hsa-let-7b (0.0006) hsa-let-7g (0.006) hsa-let-7f (0.0075)
REACTOME_THROMBOXANE_SIGNALLING_THROUGH_TP_RECEPTOR	GNA14 GNA11 GNG2 GNG7 GNB5 GNG11		hsa-miR-17-5p (2.9e-14) hsa-miR-106a (3.5e-14) hsa-miR-106b (4.3e-07) hsa-miR-372 (4.8e-06) hsa-miR-20b (7e-05) hsa-miR-20a (0.0035)
REACTOME_METABOLISM_OF_LIPIDS_AND_LIPOPROTEINS	SGMS2 SGMS1 HSD11B1 HACL1 CYP7B1 GK MTTP FDFT1 ME1 CUBN FABP4 FABP6 SC4MOL ACADM ACADL CD36 ACAT1 NR1H3 IDI1 NCOR1 PPARA CYP39A1 AGPAT5 GNPAT AGPAT4 CYP27A1 AGT HSPG2 PRKACB CSNK1G2 CAV1 SLC25A17 OSBP SGPP1 SGPP2 PPAP2C PRKD1 PPAP2A PPAP2B SCP2 A2M CH25H RXRA HADHA HADHB GPD2 HSD17B3 HSD17B4 HADH HMGCL SPTLC1 APOC2 CRAT ACOX2 AKR1C4 NCOA1 CHD9 TBL1X VAPA COL4A3BP SLC27A1 SLC27A2 SLC27A5 MED1 STAR…		hsa-miR-203 (5.9e-16) hsa-miR-19b (2.1e-11) hsa-miR-182 (3.4e-09) hsa-miR-9 (2.3e-08) hsa-miR-206 (4.2e-07) hsa-miR-301 (5.4e-07) hsa-miR-130a (2.2e-06) hsa-miR-137 (7.2e-06) hsa-miR-367 (3.9e-05) hsa-miR-424 (0.0003) hsa-miR-23b (0.0003) hsa-miR-218 (0.0005) hsa-miR-19a (0.00096) hsa-miR-130b (0.0018) hsa-miR-96 (0.0066) hsa-miR-181b (0.007)
REACTOME_CRMPS_IN_SEMA3A_SIGNALING	NRP1 FYN FES DPYSL2		hsa-miR-130b (2.5e-14) hsa-miR-130a (5.7e-05) hsa-miR-301 (0.00011) hsa-miR-142-5p (0.0025)
REACTOME_MRNA_SPLICING	CCAR1 SFRS11 DHX9 YBX1 THOC4 SF3B1 SF3A3 TXNL4A NCBP2 NCBP1 SNRPD3 SNRPD1 SNRPD2 PABPN1 PRPF4 PRPF6 SF3B14 FUS LSM2 UPF3B SNRPA1 HNRNPA2B1 SNRPB2 HNRNPL HNRNPC CPSF3 CPSF1 RBM8A SFRS9 U2AF1 SFRS1 SFRS2 PCF11 POLR2H POLR2G POLR2F POLR2K POLR2J POLR2D SF4 SNRPB SNRPA SNRPF SNRPE SNRPG CSTF2 RNPS1 CSTF1	*	hsa-miR-802 (5.8e-42) hsa-miR-134 (1.1e-37) hsa-miR-132 (4.2e-35) hsa-miR-212 (1.8e-31) hsa-miR-507 (2.7e-17) hsa-miR-216 (1.7e-14) hsa-miR-10b (2.3e-14) hsa-miR-217 (6.7e-13) hsa-miR-10a (4e-12) hsa-miR-190 (3.6e-09) hsa-miR-495 (0.00011) hsa-miR-331 (0.00079)
REACTOME_POLYMERASE_SWITCHING	PCNA POLA1 POLA2 POLD1 PRIM1 PRIM2 RFC5 RFC3 RFC4 RFC2	*	hsa-miR-154 (1.4e-57) hsa-miR-134 (2.2e-43) hsa-miR-515-5p (1.9e-42) hsa-miR-217 (1.5e-18)
REACTOME_COLLAGEN_MEDIATED_ACTIVATION_CASCADE	LYN PDPK1 FYN PIK3R1 AKT3		hsa-miR-203 (3.5e-08) hsa-miR-106b (0.0016) hsa-miR-200c (0.0058) hsa-miR-181b (0.006) hsa-miR-375 (0.0066) hsa-miR-17-5p (0.0068)
REACTOME_G_ALPHA_I_SIGNALLING_EVENTS	AGTR2 SSTR1 C5 CXCL12 GALR1 C3AR1 C5AR1 CCR6 CCR2 AGT CXCR6 GNG2 GNG7 GNAI1 NPY5R PENK GNB5 GNG11 CCL23 CCL21 NPY1R P2RY12 P2RY13 P2RY14 GPR44 MTNR1A ANXA1 ADCY4 ADCY2 ADCY8 POMC ADCY9 CNR1		hsa-miR-130b (4e-21) hsa-miR-19a (8.1e-09) hsa-miR-301 (4.1e-08) hsa-miR-130a (6.1e-06) hsa-miR-181b (2.5e-05) hsa-miR-32 (3e-05) hsa-miR-182 (0.00016) hsa-miR-106a (0.00049) hsa-miR-302a (0.00071) hsa-miR-19b (0.0019) hsa-miR-485-3p (0.0026) hsa-miR-367 (0.003) hsa-miR-218 (0.0035) hsa-miR-106b (0.0077) hsa-miR-200c (0.0081) hsa-miR-23b (0.0098)
REACTOME_GLUCOSE_REGULATION_OF_INSULIN_SECRETION	PGAM1 PGAM2 PDHA1 FH NDUFB11 PDHX CS SDHA SDHC CYC1 UQCRQ CYCS UQCRH PKM2 GCK ATP5C1 MDH2 IDH2 ATP5E ATP5I ATP5H ATP5J STX1A COX5A COX5B PRKACG PRKACA COX6C COX7B COX8A UQCRFS1 PFKP PFKM GAPDH DLAT NDUFA13 SLC2A1 ATP5J2 IDH3B CACNA2D2 NDUFV3 NDUFV1 CACNA1A NDUFS6 NDUFS5 NDUFS8 NDUFS3 NDUFS1 ATP5G1 RAPGEF3 PFKFB4 PFKFB1 TPI1 COX6B1 COX6A1 SLC25A5 COX7A2L PGK1 NDUFC2 NDUFB3 NDUFB4 NDUFB5 NDUFB7 NDU…	*	hsa-miR-217 (2.5e-30) hsa-miR-134 (1.6e-18) hsa-let-7b (1.1e-13) hsa-miR-503 (2.3e-12) hsa-let-7e (1e-11) hsa-let-7c (1.8e-11) hsa-miR-320 (1.1e-10) hsa-let-7i (1.2e-07) hsa-miR-148b (9.7e-07) hsa-miR-98 (0.00037) hsa-miR-122a (0.0004) hsa-miR-29b (0.00058) hsa-miR-133a (0.0015) hsa-miR-633 (0.0034)
REACTOME_CENTROSOME_MATURATION	CSNK1D MAPRE1 TUBA4A NEK2 YWHAG CEP72 PCNT OFD1 CCNB1 AZI1 TUBB PLK4 PLK1 CEP152 CEP164 CKAP5 CENPJ		hsa-miR-132 (8e-15) hsa-miR-212 (0.00044) hsa-miR-216 (0.0011) hsa-miR-21 (0.0049) hsa-miR-10a (0.0076)
REACTOME_ACTIVATION_OF_CHAPERONES_BY_IRE1_ALPHA	DNAJC3 DNAJB9 SERP1 XBP1		hsa-miR-200c (7.4e-05) hsa-miR-367 (0.002) hsa-miR-183 (0.0079) hsa-miR-92 (0.009) hsa-miR-106b (0.0098)
REACTOME_CD28_CO_STIMULATION	LYN PDPK1 FYN PIK3R1 AKT3		hsa-miR-203 (4.6e-11) hsa-miR-106b (5.6e-05)
REACTOME_GLOBAL_GENOMIC_NER	LIG1 PCNA GTF2H4 POLE2 POLD1 POLE RFC5 RFC3 RFC4 RFC2		hsa-miR-154 (8.6e-08) hsa-miR-134 (6.8e-06)
REACTOME_REGULATION_OF_INSULIN_SECRETION	PGAM1 PGAM2 PDHA1 FH GNGT1 NDUFB11 PDHX CS SDHA SDHC CYC1 UQCRQ CYCS UQCRH PKM2 GCK ATP5C1 MDH2 IDH2 ATP5E ATP5I ATP5H ATP5J STX1A COX5A COX5B PRKACG PRKACA COX6C COX7B COX8A UQCRFS1 PFKP PFKM GAPDH GNG3 GNG5 DLAT NDUFA13 GNAS SLC2A1 ATP5J2 IDH3B CACNA2D2 NDUFV3 NDUFV1 PRKAR1B CACNA1A NDUFS6 NDUFS5 NDUFS8 NDUFS3 NDUFS1 CHRM3 ATP5G1 ADCY5 ADCY6 RAPGEF3 PFKFB4 PFKFB1 TPI1 COX6B1 COX6A1 SLC25A5 COX7…		hsa-miR-503 (7.1e-12) hsa-let-7b (9.5e-12) hsa-miR-134 (5.4e-07) hsa-miR-217 (4.2e-06) hsa-miR-98 (0.00018) hsa-miR-26a (0.00031) hsa-miR-320 (0.00032) hsa-let-7f (0.00053) hsa-let-7i (0.00078) hsa-miR-122a (0.0015) hsa-let-7e (0.0018)
REACTOME_REMOVAL_OF_THE_FLAP_INTERMEDIATE	FEN1 PCNA POLA1 POLA2 POLD1 PRIM1 PRIM2		hsa-miR-154 (3.6e-64) hsa-miR-610 (2.7e-20) hsa-miR-515-5p (2.7e-19) hsa-miR-217 (2.7e-12)
REACTOME_G_PROTEIN_ACTIVATION	GNG2 GNG7 GNAI1 GNB5 GNG11		hsa-miR-485-3p (7.1e-12) hsa-miR-17-5p (8e-05) hsa-miR-20b (0.00011) hsa-miR-302a (0.00095) hsa-miR-19a (0.0049)
REACTOME_RESOLUTION_OF_AP_SITES_VIA_THE_SINGLE_NUCLEOTIDE_REPLACEMENT_PATHWAY	MBD4 TDG SMUG1 POLB MUTYH APEX1		hsa-let-7b (6.1e-06) hsa-miR-30b (0.00023) hsa-let-7i (0.0018) hsa-let-7f (0.0034)
REACTOME_ELECTRON_TRANSPORT_CHAIN	NDUFB11 SDHC CYC1 UQCRQ CYCS UQCRH COX5A COX5B COX6C COX7B COX8A UQCRFS1 NDUFA13 NDUFV3 NDUFV1 NDUFS6 NDUFS5 NDUFS8 NDUFS3 NDUFS1 COX6B1 COX6A1 COX7A2L NDUFC2 NDUFB3 NDUFB4 NDUFB5 NDUFB7 NDUFB9 NDUFB2 NDUFA2 NDUFA3 NDUFA8 NDUFA9 NDUFA6 NDUFA1	*	hsa-miR-133a (3.2e-11) hsa-miR-34c (3.9e-10) hsa-miR-607 (1.6e-05) hsa-miR-133b (0.0001) hsa-miR-34a (0.0016)
REACTOME_BIOLOGICAL_OXIDATIONS	CYP1B1 CYP7B1 UGDH FMO2 FMO3 ACSM1 UGP2 CYP2U1 ADH6 GSTA2 GSTA3 GSTA5 CYP3A4 CYP3A5 CYP3A7 CYP39A1 CYP27A1 PTGIS UGT2B7 PTGS2 MAOA MAOB MAT2B ADH1C ADH1B ADH1A UGT2B28 UGT2B11 UGT2B10 ALDH1A1 TBXAS1 NAT1 GSTM5 GCLC GCLM MGST2		hsa-miR-130a (6.4e-40) hsa-miR-301 (2.2e-12) hsa-miR-142-5p (2e-11) hsa-miR-130b (4e-11) hsa-miR-485-3p (5.3e-11) hsa-miR-17-5p (1.2e-10) hsa-miR-92 (2.1e-09) hsa-miR-200c (5.6e-08) hsa-miR-101 (1.2e-06) hsa-miR-1 (3.6e-06) hsa-miR-367 (3.8e-06) hsa-miR-92b (0.00018) hsa-miR-20a (0.00021) hsa-miR-32 (0.00045) hsa-miR-106b (0.0017)
REACTOME_AMINE_LIGAND_BINDING_RECEPTORS	ADRA2A HRH1 ADRB3 HTR2B HTR2A DRD1 ADRB2 CHRM1 HTR4 HTR7 TAAR1		hsa-miR-302d (0.0023)
REACTOME_PHOSPHORYLATION_OF_CD3_AND_TCR_ZETA_CHAINS	HLA-DQA2 HLA-DQA1 HLA-DRA HLA-DOA HLA-DQB1 TRA@ HLA-DMB HLA-DMA CD3G CD3D HLA-DPA1 HLA-DRB5 HLA-DPB1 LCK PAG1 CD247 PTPRC		hsa-miR-214 (1.1e-09)
REACTOME_ASSOCIATION_OF_LICENSING_FACTORS_WITH_THE_PREREPLICATIVE_COMPLEX	E2F1 E2F2 E2F3 ORC1L CDC6 ORC2L CDT1	*	hsa-miR-10b (8.5e-25) hsa-miR-10a (4.2e-23) hsa-miR-643 (8.8e-19) hsa-miR-200a (9.5e-17) hsa-miR-34a (2.2e-15) hsa-miR-342 (4e-11) hsa-miR-205 (5.4e-09) hsa-miR-34c (3.9e-08) hsa-miR-433 (1.2e-06) hsa-miR-148b (2.2e-05) hsa-miR-124 (2.7e-05) hsa-miR-140 (6.6e-05) hsa-miR-30c (0.00018) hsa-miR-210 (0.00026) hsa-miR-200b (0.0017) hsa-miR-30b (0.0092)
REACTOME_ACTIVATION_OF_RAC	RAC1 SOS2 SLIT2 PAK3		hsa-miR-101 (0.002)
REACTOME_P75NTR_RECRUITS_SIGNALLING_COMPLEXES	IRAK1 PRKCI RIPK2		hsa-miR-134 (2.6e-16)
REACTOME_BETACATENIN_PHOSPHORYLATION_CASCADE	APC PPP2CB		hsa-miR-203 (9e-06)
REACTOME_TAT_MEDIATED_HIV1_ELONGATION_ARREST_AND_RECOVERY	SUPT16H TH1L TCEB3 TCEB1 WHSC2 SUPT5H ELL CCNT1 POLR2H POLR2G POLR2F POLR2K POLR2J POLR2D		hsa-miR-132 (7.2e-128) hsa-miR-212 (9.8e-09) hsa-miR-24 (2.5e-08) hsa-miR-495 (2.2e-07) hsa-miR-30b (3.7e-06) hsa-miR-30d (0.00018)
REACTOME_BASE_FREE_SUGAR_PHOSPHATE_REMOVAL_VIA_THE_SINGLE_NUCLEOTIDE_REPLACEMENT_PATHWAY	MBD4 TDG SMUG1 POLB MUTYH APEX1		hsa-miR-30b (9e-06) hsa-let-7i (0.00057) hsa-let-7f (0.0034) hsa-miR-320 (0.0058) hsa-let-7a (0.0076)
REACTOME_ABORTIVE_ELONGATION_OF_HIV1_TRANSCRIPT_IN_THE_ABSENCE_OF_TAT	NCBP2 NCBP1 TH1L WHSC2 SUPT5H POLR2H POLR2G POLR2F POLR2K POLR2J POLR2D		hsa-miR-133b (0.0018)
REACTOME_HIV1_TRANSCRIPTION_INITIATION	TAF11 TAF13 GTF2H4 GTF2E1 TAF4 TAF5 POLR2H POLR2G POLR2K POLR2J POLR2D		hsa-miR-212 (3.3e-48) hsa-miR-132 (4.4e-27) hsa-miR-320 (5.3e-07) hsa-miR-21 (1.1e-05) hsa-let-7b (6.3e-05) hsa-let-7g (0.0025) hsa-let-7e (0.0037) hsa-let-7i (0.0066)
REACTOME_G_PROTEIN_BETA_GAMMA_SIGNALLING	PDPK1 GNG2 GNG7 GNB5 GNG11 AKT3		hsa-miR-203 (3.6e-30) hsa-miR-200c (7.3e-07) hsa-miR-106b (2.4e-06) hsa-miR-375 (3.5e-06) hsa-miR-372 (0.00036) hsa-miR-106a (0.00091) hsa-miR-15a (0.0029) hsa-miR-17-5p (0.0083)
REACTOME_CDC20_PHOSPHO_APC_MEDIATED_DEGRADATION_OF_CYCLIN_A	ANAPC1 UBE2C CCNA2 BUB3 MAD2L1 CDC23 CDC20 PSMD14 PSMD12 PSMA6 PSMA5 PSMA4 ANAPC11 PSMA7 PSMB5 PSMB4 PSMB2 PSMC2 PSMD2 PSMD4 PSME2 BUB1B	*	hsa-miR-132 (5.5e-64) hsa-miR-802 (6.5e-60) hsa-miR-212 (3.2e-45) hsa-miR-507 (9e-22) hsa-miR-765 (8.9e-09) hsa-miR-766 (1.9e-08) hsa-miR-381 (4e-07) hsa-miR-495 (6.4e-07)
REACTOME_TOLL_RECEPTOR_CASCADES	MEF2C MEF2A PIK3C3 MAPK3 DUSP4 PPP2R1A LY96 SIGIRR CD14 IRAK4 FOS CHUK MAP3K1 MAP2K7 MAP2K3 MAP2K4 PPP2CB RPS6KA5 RPS6KA3 RPS6KA2 TLR10 ZFYVE20 NFKB1 MAPK11 MAPK10 TLR1 TLR2 TLR3 TLR4 TLR5 TLR6 TLR7 TLR8 RIPK3		hsa-miR-203 (5.5e-33) hsa-miR-130b (6.2e-12) hsa-miR-19a (6.7e-10) hsa-miR-23b (1.6e-06) hsa-miR-130a (2.2e-06) hsa-miR-181b (1.4e-05) hsa-miR-372 (1.6e-05) hsa-miR-106a (4.5e-05) hsa-miR-214 (6.2e-05) hsa-miR-142-5p (9.3e-05) hsa-miR-302a (0.00026) hsa-miR-19b (0.00092) hsa-miR-367 (0.002) hsa-miR-9 (0.0034) hsa-miR-137 (0.0061)
REACTOME_RAS_ACTIVATION_UOPN_CA2_INFUX_THROUGH_NMDA_RECEPTOR	CAMK2D NEFL RASGRF1 CALM2 CALM1		hsa-miR-130b (5.7e-26) hsa-miR-130a (9.7e-15) hsa-miR-27b (1.3e-07) hsa-miR-32 (4.7e-06) hsa-miR-301 (1.7e-05) hsa-miR-23b (1.8e-05) hsa-miR-770-5p (0.0023) hsa-miR-92b (0.0025) hsa-miR-27a (0.0047) hsa-miR-561 (0.0054)
REACTOME_PROCESSING_OF_CAPPED_INTRON_CONTAINING_PRE_MRNA	RAE1 CCAR1 SFRS11 DHX9 YBX1 THOC4 NUP107 SF3B1 SF3A3 TXNL4A NCBP2 NCBP1 SNRPD3 SNRPD1 SNRPD2 PABPN1 PRPF4 PRPF6 SF3B14 FUS SEH1L NUP155 LSM2 AAAS UPF3B NUP205 NUP214 NUP210 SNRPA1 HNRNPA2B1 SNRPB2 HNRNPL HNRNPC NUP85 CPSF3 CPSF1 RBM8A SFRS9 U2AF1 SFRS1 SFRS2 PCF11 NUP43 NUP62 POLR2H POLR2G POLR2F POLR2K POLR2J POLR2D SF4 SNRPB SNRPA SNRPF SNRPE SNRPG CSTF2 RNPS1 CSTF1	*	hsa-miR-802 (2.8e-169) hsa-miR-132 (7.9e-62) hsa-miR-212 (6.4e-53) hsa-miR-507 (2.3e-49) hsa-miR-10a (5.8e-22) hsa-miR-134 (7.1e-20) hsa-miR-495 (3.4e-09) hsa-miR-432 (1.1e-05) hsa-miR-10b (1.8e-05) hsa-miR-190 (0.00081) hsa-miR-200a (0.001) hsa-miR-216 (0.0023) hsa-miR-217 (0.0025) hsa-miR-133a (0.0042) hsa-miR-326 (0.0052)
REACTOME_FORMATION_OF_A_POOL_OF_FREE_40S_SUBUNITS	RPLP0 RPS27A RPL10A RPL13A EIF1AX EIF3D EIF3E EIF3F RPL18 RPL19 RPL14 RPL13 RPL15 RPL10 RPL11 RPL12 RPS14 RPS15 RPS13 RPS25 RPS27 RPS23 RPS24 RPS9 RPS6 RPS5 RPS8 RPL41 RPL3L RPL36 RPL34 RPL26 RPL27 RPL28 RPL23 RPL21 RPL6 RPL9 RPL3 RPL5 RPL4 RPL7A RPL23A RPS3A RPS4X RPS15A		hsa-miR-137 (4.4e-13) hsa-miR-142-5p (5.1e-12) hsa-miR-376b (9.3e-05)
REACTOME_NCAM1_INTERACTIONS	CNTN2 COL9A1 COL9A2 COL9A3 COL5A2 COL5A1 ARTN COL1A1 NCAN COL4A2 COL4A1 AGRN COL2A1		hsa-let-7b (0.0022)
REACTOME_TELOMERE_MAINTENANCE	LIG1 FEN1 HIST1H4K HIST1H4A HIST1H4F HIST1H4I HIST1H4J HIST1H4H DKC1 H2BFS HIST3H2BB HIST2H2AA3 HIST1H2BO HIST1H2BM HIST1H2BN HIST1H2BK HIST1H2BL HIST1H2BI HIST1H2BJ PCNA HIST2H2AC HIST2H2BE HIST1H2AB HIST1H2AC HIST1H2AD HIST1H2AE POLA2 HIST1H2BB HIST1H2BD HIST1H2BE HIST1H2BF HIST1H2BG HIST1H2BH HIST1H2AK POLE2 POLD1 PRIM1 PRIM2 H2AFZ H2AFX POLE RFC5 RFC3 RFC4 RFC2 HIST4H4	*	hsa-miR-802 (6.5e-257) hsa-miR-132 (1.4e-105) hsa-miR-154 (5.4e-75) hsa-miR-212 (3e-69) hsa-miR-134 (1.8e-61) hsa-miR-610 (6.9e-46) hsa-miR-515-5p (1.6e-26) hsa-miR-217 (1.9e-18) hsa-miR-24 (1.4e-16) hsa-miR-584 (1.4e-05) hsa-miR-328 (0.00017) hsa-miR-200a (0.00024) hsa-miR-659 (0.0062)
REACTOME_SIGNALLING_TO_P38_VIA_RIT_AND_RIN	HRAS BRAF NRAS KRAS RIT1 YWHAB		hsa-miR-134 (1.8e-22) hsa-miR-217 (1.2e-21) hsa-let-7e (1.5e-10) hsa-miR-30b (3.3e-09) hsa-miR-98 (7.2e-08) hsa-let-7a (8.6e-06) hsa-miR-216 (0.0001) hsa-let-7b (0.00013) hsa-let-7c (0.00046) hsa-miR-190 (0.00063) hsa-let-7g (0.0026)
REACTOME_GLUCAGON_TYPE_LIGAND_RECEPTORS	VIPR2 GNG2 GNG7 GNB5 GNG11		hsa-miR-20b (0.0022)
REACTOME_RHO_GTPASE_CYCLE	RAC1 ARHGEF12 NET1 ARHGDIA ARHGDIB ABR MCF2L CHN2 TAGAP RHOBTB1 ARHGAP18 ARHGAP15 ARHGAP20 G3BP2 ARHGAP24 DLC1 A2M RICH2 ARHGEF4 ARHGEF3 ARHGEF6 SOS2 RASGRF1 RHOJ RHOU RHOA RHOH AKAP13 STARD13 STARD8 RHOT1 ARHGAP6 ARHGAP5 ARHGAP1 ARHGAP9		hsa-miR-130b (8.3e-06) hsa-miR-101 (9e-06) hsa-miR-181b (2.7e-05) hsa-miR-130a (4.2e-05) hsa-miR-301 (0.00012) hsa-miR-218 (0.00026) hsa-miR-137 (0.00055) hsa-miR-9 (0.0037) hsa-miR-23b (0.0041) hsa-miR-19a (0.0059) hsa-miR-485-3p (0.0071)
REACTOME_NUCLEAR_IMPORT_OF_REV_PROTEIN	RAE1 NUP107 RAN SEH1L TPR NUP160 NUP155 AAAS NUP205 NUP214 NUP210 NUP85 NUP98 NUP93 NUP35 NUP43 NUP62 NUPL2 KPNB1 POM121		hsa-miR-132 (5.1e-46) hsa-miR-212 (1.7e-20) hsa-miR-21 (2.6e-10) hsa-miR-216 (2e-09) hsa-let-7b (3.7e-09) hsa-let-7c (1.3e-05) hsa-let-7e (1.4e-05) hsa-let-7i (0.00016) hsa-let-7g (0.00017) hsa-miR-342 (0.00085) hsa-miR-98 (0.0012)
REACTOME_REGULATION_OF_GLUCOKINASE_BY_GLUCOKINASE_REGULATORY_PROTEIN	RAE1 NUP107 GCK SEH1L TPR NUP160 NUP155 AAAS NUP205 NUP214 NUP210 NUP85 NUP98 NUP93 NUP35 NUP43 NUP62 NUPL2 POM121		hsa-miR-212 (1.5e-33) hsa-miR-132 (5.2e-22) hsa-miR-93 (1.9e-16) hsa-let-7b (4.2e-08) hsa-let-7g (1.8e-07) hsa-miR-216 (3.8e-07) hsa-miR-21 (4.6e-05) hsa-miR-514 (0.00011) hsa-let-7i (0.00061) hsa-miR-381 (0.0019) hsa-miR-342 (0.0028) hsa-let-7c (0.0046)
REACTOME_SEROTONIN_NEUROTRANSMITTER_RELEASE_CYCLE	RIMS1 STX1A RAB3A DDC SYN2		hsa-miR-217 (7e-05)
REACTOME_TRAFFICKING_OF_GLUR2_CONTAINING_AMPA_RECEPTORS	AP2B1 GRIA3 AP2A2 GRIA2 NSF		hsa-miR-203 (2.8e-09) hsa-miR-92 (2.4e-05) hsa-miR-32 (0.0001) hsa-miR-335 (0.00012) hsa-miR-218 (0.00013) hsa-miR-23b (0.00014) hsa-miR-181b (0.00022) hsa-miR-330 (0.006) hsa-miR-506 (0.0073) hsa-miR-92b (0.0097)
REACTOME_CLASS_A1_RHODOPSIN_LIKE_RECEPTORS	AGTR1 AGTR2 SSTR1 C3 C5 FPR1 MC4R CXCL12 GALR1 C3AR1 CYSLTR2 CCL5 P2RY1 PTGER2 PTGER4 HRH1 EDN1 C5AR1 CCR6 PPBP CCR5 CCR2 BDKRB2 PTGDR AGT PTGFR TRH CXCR6 FSHR ADRB3 NPY5R PENK AVPR1A GPR65 CCL23 CCL21 CCL19 NPY1R P2RY12 P2RY13 P2RY10 P2RY14 NMBR HTR2B HTR2A GPR44 RLN2 DRD1 XCL1 XCL2 MTNR1A CCRL1 ADRB2 CHRM1 PF4 ANXA1 CX3CR1 POMC EDNRA EDNRB DARC CNR1 TAAR1 NTS		hsa-miR-203 (3e-14) hsa-miR-182 (5.8e-05) hsa-miR-23b (0.0017) hsa-miR-367 (0.0033) hsa-miR-92 (0.0049) hsa-miR-302a (0.0062)
REACTOME_G_BETA_GAMMA_SIGNALLING_THROUGH_PI3KGAMMA	PDPK1 GNG2 GNG7 GNB5 GNG11 AKT3		hsa-miR-203 (4.2e-48) hsa-miR-106a (2.7e-05) hsa-miR-375 (3.6e-05) hsa-miR-15a (0.00014) hsa-miR-372 (0.00022) hsa-miR-181b (0.00024) hsa-miR-200c (0.00047) hsa-miR-106b (0.00074) hsa-miR-17-5p (0.006)
REACTOME_PLC_GAMMA1_SIGNALLING	PRKACB PDE1C PRKAR1A ADCY4 ADCY2 ADCY8 ITPR1 ITPR2 ADCY9 CALM2 CALM1		hsa-miR-301 (1.1e-24) hsa-miR-19a (5.8e-13) hsa-miR-130a (1.7e-09) hsa-miR-130b (1.8e-08) hsa-miR-96 (1.1e-07) hsa-miR-92 (3.6e-07) hsa-miR-206 (6.5e-07) hsa-miR-203 (2.4e-06) hsa-miR-181b (1.2e-05) hsa-miR-16 (0.00012) hsa-miR-32 (0.00044) hsa-miR-367 (0.004) hsa-miR-19b (0.0042) hsa-miR-136 (0.0049)
REACTOME_CTLA4_INHIBITORY_SIGNALING	LYN PPP2R1A PDPK1 FYN PPP2CB AKT3		hsa-miR-203 (1.4e-24) hsa-miR-106b (1.9e-13) hsa-miR-214 (2.9e-13) hsa-miR-17-5p (1.9e-05) hsa-miR-181b (8.2e-05) hsa-miR-27b (0.00038) hsa-miR-375 (0.002) hsa-miR-200c (0.0085)
REACTOME_SIGNALING_BY_NOTCH	JAG1 DLL1 APH1B		hsa-miR-130b (2.1e-08) hsa-miR-301 (6.8e-07) hsa-miR-130a (0.00029) hsa-miR-16 (0.0041)
REACTOME_PURINE_SALVAGE_REACTIONS	GMPR2 GMPR AMPD3		hsa-miR-130b (1.2e-25) hsa-miR-301 (1.1e-07) hsa-miR-130a (0.0025)
REACTOME_NUCLEAR_RECEPTOR_TRANSCRIPTION_PATHWAY	RORC RORA ESRRG AR NR4A2 PPARG PGR RXRA ESR1 NR3C2 NR3C1 RARB NR2F1 THRA		hsa-miR-181b (1.2e-19) hsa-miR-130a (7.7e-12) hsa-miR-301 (1.5e-11) hsa-miR-19b (5.8e-09) hsa-miR-203 (3.7e-06) hsa-miR-9 (2.3e-05) hsa-miR-130b (3.4e-05) hsa-miR-372 (5.8e-05) hsa-miR-182 (7.3e-05) hsa-miR-19a (0.00015) hsa-miR-20a (0.0014)
REACTOME_S_PHASE	LIG1 FEN1 CKS1B CCNA2 SKP2 ORC1L PCNA CCNE2 CCNE1 CDC6 POLA2 POLE2 ORC6L GINS1 GINS2 GINS4 POLD1 CDK4 CDK2 ORC2L CDC25A CDC25B PRIM1 PRIM2 POLE RFC5 RFC3 RFC4 RFC2 CDT1 PSMD14 PSMD12 PSMA6 PSMA5 PSMA4 PSMA7 PSMB5 PSMB4 PSMB2 PSMC2 MCM8 MCM7 PSMD2 PSMD4 MCM2 MCM3 MCM4 MCM5 MCM6 PSME2	*	hsa-miR-212 (1.3e-79) hsa-miR-802 (1.6e-64) hsa-miR-154 (1e-47) hsa-miR-132 (7.2e-38) hsa-let-7i (8.1e-31) hsa-miR-610 (1.5e-29) hsa-miR-134 (2.4e-28) hsa-miR-507 (6.6e-28) hsa-miR-519a (7.7e-16) hsa-miR-765 (2.2e-15) hsa-let-7g (3.4e-14) hsa-miR-217 (2.1e-13) hsa-miR-503 (4.2e-13) hsa-miR-21 (7.8e-13) hsa-let-7b (8.2e-13) hsa-miR-515-5p (1e-10) hsa-miR-34a (1.3e-10) hsa-miR-138 (2.3e-09) hsa-let…
REACTOME_METABOLISM_OF_VITAMINS_AND_COFACTORS	DHFR SLC25A16 PANK4 SLC5A6 ACP5 MTHFD1 NADK SLC2A1 FLAD1 NAPRT1 SLC19A1 FASN		hsa-miR-30b (0.0062)
REACTOME_E2F_TRANSCRIPTIONAL_TARGETS_AT_G1_S	E2F1 E2F2 E2F3 DHFR TYMS ORC1L PCNA CCNE1 CDC6 RRM2 CDC25A CDT1	*	hsa-miR-217 (6.7e-21) hsa-let-7b (3.4e-15) hsa-miR-21 (3.4e-14) hsa-miR-34c (5.4e-14) hsa-miR-154 (1e-10) hsa-let-7i (1.3e-10) hsa-miR-30b (4.8e-08) hsa-miR-10b (5.6e-08) hsa-miR-503 (5.8e-08) hsa-miR-10a (1e-07) hsa-miR-34a (2.2e-06) hsa-miR-148b (1.6e-05) hsa-miR-30c (2.7e-05) hsa-miR-205 (4.2e-05) hsa-let-7c (4.8e-05) hsa-miR-342 (6e-05) hsa-let-7a (7.3e-05) hsa-let-7e (0.00028) hsa-let-7f (0.…
REACTOME_SIGNAL_ATTENUATION	INSR IRS1		hsa-miR-145 (4.1e-06) hsa-miR-15a (0.00011) hsa-miR-27b (0.0066)
REACTOME_GRB2_EVENTS_IN_EGFR_SIGNALING	HRAS NRAS KRAS YWHAB SOS1		hsa-miR-134 (4.5e-11) hsa-let-7b (2.7e-05) hsa-miR-30b (0.00051) hsa-let-7a (0.00072) hsa-miR-98 (0.0019) hsa-miR-217 (0.0023) hsa-let-7i (0.0039) hsa-miR-216 (0.0082) hsa-miR-30d (0.0094)
REACTOME_PHASE_II_CONJUGATION	UGDH ACSM1 UGP2 GSTA2 GSTA3 GSTA4 GSTA5 SULT1A1 SULT1A2 ACSM2B SULT1B1 UGT2B7 MAT2B UGT2B28 UGT2B11 UGT2B10 NAT1 GSTM5 GCLC GCLM GSTO2 GSTO1 MGST1 MGST2		hsa-miR-130b (6.2e-20) hsa-miR-485-3p (7.3e-14) hsa-miR-367 (7.1e-13) hsa-miR-130a (2.4e-12) hsa-miR-18a (2.4e-12) hsa-miR-142-5p (2.8e-08) hsa-miR-92 (2.7e-06) hsa-miR-301 (1.7e-05) hsa-miR-25 (0.00022) hsa-miR-32 (0.0017) hsa-miR-20b (0.002)
REACTOME_PHOSPHORYLATION_OF_THE_APC	ANAPC1 UBE2C CCNB1 PLK1 CDC23 ANAPC11		hsa-miR-495 (2.9e-14) hsa-miR-766 (5.5e-08)
REACTOME_TRANSCRIPTION_OF_THE_HIV_GENOME	TAF11 TAF13 NCBP2 NCBP1 SUPT16H GTF2H4 TCEB3 TCEB1 GTF2E1 TAF4 TAF5 WHSC2 SUPT5H ELL CCNT1 POLR2H POLR2G POLR2K POLR2J POLR2D		hsa-miR-132 (1.6e-46) hsa-miR-21 (1.1e-13) hsa-miR-212 (1.5e-12) hsa-miR-320 (3.5e-08) hsa-miR-495 (1.4e-06) hsa-miR-30b (1.5e-06) hsa-miR-34c (1.6e-05) hsa-let-7i (2.7e-05) hsa-let-7g (9e-05) hsa-let-7b (0.00018) hsa-let-7e (0.00025) hsa-miR-30c (0.0012) hsa-let-7a (0.003)
REACTOME_TRANSCRIPTION	SFRS11 LZTS1 TAF1A BRF1 TAF11 TAF13 THOC4 NCBP2 NCBP1 PABPN1 HIST1H4K HIST1H4A HIST1H4F HIST1H4I HIST1H4J HIST1H4H HIST1H3J EHMT2 HIST1H3A HIST1H3B HIST1H3F HIST1H3H GTF3C2 GTF3C4 GTF3C3 SUPT16H H2BFS HIST3H2BB ERCC6 HIST2H2AA3 HIST1H2BO HIST1H2BM HIST1H2BN HIST1H2BK HIST1H2BL HIST1H2BI HIST1H2BJ UPF3B HIST2H2AC GTF2H4 HIST2H2BE HIST1H2AB HIST1H2AC HIST1H2AD HIST1H2AE HIST1H2BB HIST1H2BD HIST1H2B…	*	hsa-miR-212 (1.4e-165) hsa-miR-802 (2.4e-95) hsa-miR-132 (5.5e-51) hsa-miR-134 (3.2e-36) hsa-miR-10a (9.6e-24) hsa-miR-495 (9.9e-19) hsa-miR-507 (2.1e-18) hsa-miR-10b (4.6e-17) hsa-miR-21 (5.8e-14) hsa-miR-200a (3.5e-13) hsa-miR-432 (1.9e-11) hsa-miR-34c (9.7e-09) hsa-miR-193a (9.6e-08) hsa-miR-152 (3.5e-07) hsa-miR-320 (3.9e-06) hsa-miR-217 (1.1e-05) hsa-miR-24 (1.8e-05) hsa-miR-377 (2.5e-05) hs…
REACTOME_DOWN_STREAM_SIGNAL_TRANSDUCTION	MAPK3 STAT5A PDGFA PIK3R1 RASA1 RAPGEF1 PDGFRA PDGFRB STAT3 CRKL		hsa-miR-130a (6.2e-06) hsa-miR-130b (0.001) hsa-miR-301 (0.0024) hsa-miR-1 (0.0043) hsa-miR-181b (0.0088)
REACTOME_REGULATION_OF_INSULIN_SECRETION_BY_ACETYLCHOLINE	GNA14 GNA11 STXBP1 GNAI1 MARCKS ITPR1 ITPR2		hsa-miR-130a (2.8e-14) hsa-miR-130b (3.3e-07) hsa-miR-19a (3.6e-06) hsa-miR-23b (4.5e-06) hsa-miR-203 (8.5e-05) hsa-miR-32 (0.00061) hsa-miR-96 (0.0011) hsa-miR-218 (0.0029) hsa-miR-200c (0.0036) hsa-miR-182 (0.0044) hsa-miR-485-3p (0.0076)
REACTOME_ORC1_REMOVAL_FROM_CHROMATIN	CCNA2 ORC1L CDC6 ORC6L CDK2 ORC2L CDT1 PSMD14 PSMD12 PSMA6 PSMA5 PSMA4 PSMA7 PSMB5 PSMB4 PSMB2 PSMC2 MCM8 MCM7 PSMD2 PSMD4 MCM2 MCM3 MCM4 MCM5 MCM6 PSME2	*	hsa-miR-212 (2.9e-103) hsa-miR-507 (8.6e-92) hsa-miR-802 (7e-75) hsa-miR-132 (6.4e-62) hsa-miR-765 (4e-14) hsa-miR-519a (7.4e-12) hsa-miR-30b (1.1e-11) hsa-miR-30c (4.6e-07) hsa-miR-643 (1.1e-05) hsa-miR-381 (0.0091)
REACTOME_NEF_MEDIATES_DOWN_MODULATION_OF_CELL_SURFACE_RECEPTORS_BY_RECRUITING_THEM_TO_CLATHRIN_ADAPTERS	AP2B1 AP2A2 AP1S2 AP1G1		hsa-miR-101 (3.4e-07) hsa-miR-130b (4.3e-05) hsa-miR-142-5p (0.0029) hsa-miR-200c (0.0037) hsa-miR-301 (0.0059) hsa-miR-130a (0.0085)
REACTOME_ADP_SIGNALLING_THROUGH_P2Y_PURINOCEPTOR_12	GNG2 GNG7 GNAI1 GNB5 GNG11 P2RY12		hsa-miR-17-5p (4e-11) hsa-miR-485-3p (9.1e-09) hsa-miR-19a (3.6e-05) hsa-miR-106a (0.00041) hsa-miR-19b (0.001) hsa-miR-302b (0.0012) hsa-miR-372 (0.0031) hsa-miR-20a (0.0041) hsa-miR-20b (0.0053)
REACTOME_REGULATION_OF_INSULIN_SECRETION_BY_FREE_FATTY_ACIDS	GNA14 GNA11 STXBP1 GNAI1 ITPR1 ITPR2		hsa-miR-130b (1.8e-21) hsa-miR-19a (6.1e-18) hsa-miR-19b (4.8e-11) hsa-miR-130a (4.9e-11) hsa-miR-485-3p (4.9e-07) hsa-miR-218 (2e-06) hsa-miR-96 (2.1e-06) hsa-miR-203 (6.3e-06) hsa-miR-301 (5.3e-05) hsa-miR-92 (0.00013)
REACTOME_G1_PHASE	E2F1 E2F2 E2F3 CDK4		hsa-miR-10b (2.2e-08) hsa-miR-10a (5.3e-06) hsa-miR-148b (0.001) hsa-miR-34c (0.0018) hsa-miR-34a (0.003) hsa-miR-152 (0.004) hsa-miR-124 (0.006)
REACTOME_ACTIVATION_OF_NMDA_RECEPTOR_UPON_GLUTAMATE_BINDING_AND_POSTSYNAPTIC_EVENTS	PDPK1 GRIA3 GRIA2 PRKACB CAMK2D NEFL RPS6KA6 RPS6KA2 RASGRF1 ADCY8 CALM2 CALM1		hsa-miR-130b (2.9e-63) hsa-miR-130a (7.8e-34) hsa-miR-19b (8.8e-13) hsa-miR-335 (2.3e-10) hsa-miR-770-5p (2.8e-10) hsa-miR-19a (4.4e-10) hsa-miR-301 (2.5e-09) hsa-miR-32 (3.3e-07) hsa-miR-92b (6e-07) hsa-miR-579 (8e-06) hsa-miR-31 (8.8e-06) hsa-miR-218 (3.1e-05) hsa-miR-330 (3.8e-05) hsa-miR-181b (0.0001) hsa-miR-23b (0.00012) hsa-miR-25 (0.00068) hsa-miR-206 (0.0017) hsa-miR-181a (0.0042) hsa-mi…
REACTOME_FRS2MEDIATED_CASCADE	FGF7 FGF2 KL		hsa-miR-199b (0.00051)
REACTOME_ACTIVATION_OF_ATR_IN_RESPONSE_TO_REPLICATION_STRESS	RAD1 DBF4 HUS1 CLSPN ORC1L CDC7 CDC6 ORC6L CDK2 ORC2L CDC25C CDC25A RFC5 RFC4 RFC2 CHEK1 MCM10 MCM8 MCM7 MCM2 MCM3 MCM4 MCM6	*	hsa-miR-134 (5.5e-104) hsa-let-7e (2.3e-35) hsa-let-7b (3.8e-32) hsa-let-7i (2.6e-31) hsa-miR-503 (9e-31) hsa-miR-643 (3.5e-21) hsa-let-7c (1.2e-17) hsa-miR-34a (2.4e-13) hsa-miR-21 (3.9e-12) hsa-let-7g (1.1e-09) hsa-miR-519a (2.5e-09) hsa-miR-30c (1.7e-08) hsa-miR-30b (1.9e-08) hsa-let-7a (1.5e-07) hsa-let-7f (3.3e-07) hsa-miR-98 (1e-05) hsa-miR-452 (0.00067)
REACTOME_SNRNP_ASSEMBLY	RAE1 NUP107 NCBP2 NCBP1 SNRPD3 SNRPD1 SNRPD2 SEH1L TPR GEMIN6 GEMIN7 GEMIN5 NUP155 AAAS NUP205 NUP214 NUP210 DDX20 NUP85 NUP35 CLNS1A NUP43 NUP62 SNRPB SNRPF SNRPE SNRPG POM121	*	hsa-miR-212 (7.5e-116) hsa-miR-132 (8.2e-93) hsa-let-7i (6.1e-28) hsa-miR-216 (2.7e-20) hsa-let-7b (4.4e-13) hsa-miR-495 (8.2e-12) hsa-let-7c (1.1e-09) hsa-let-7g (4.2e-09) hsa-miR-342 (2e-06) hsa-let-7e (2.2e-05) hsa-miR-21 (8.2e-05) hsa-miR-98 (0.00012) hsa-miR-93 (0.0038)
REACTOME_INFLUENZA_VIRAL_RNA_TRANSCRIPTION_AND_REPLICATION	RPLP0 DNAJC3 RPS27A RPL10A GRSF1 RPL13A RPL18 RPL19 RPL14 RPL13 RPL15 RPL10 RPL11 RPL12 RPS14 RPS15 RPS13 RPS25 RPS27 RPS23 RPS24 RPS9 RPS6 RPS5 RPS8 RPL41 RPL3L RPL36 RPL34 RPL26 RPL27 RPL28 RPL23 RPL21 RPL6 RPL9 RPL3 RPL5 RPL4 RPL7A RPL23A GTF2F1 GTF2F2 RPS3A RPS4X RPS15A POLR2E POLR2C POLR2B POLR2A HSP90AA1		hsa-miR-142-5p (6e-17) hsa-miR-137 (1.5e-15) hsa-miR-376a (0.00034) hsa-miR-376b (0.0015) hsa-miR-506 (0.0016)
REACTOME_E2F_ENABLED_INHIBITION_OF_PRE_REPLICATION_COMPLEX_FORMATION	ORC1L CCNB1 ORC6L ORC2L CDC25A MCM8	*	hsa-let-7c (7.4e-37) hsa-let-7i (2e-14) hsa-let-7e (2.2e-09) hsa-let-7g (1.3e-08) hsa-miR-503 (6.8e-07) hsa-let-7b (3.9e-06) hsa-miR-30b (6.4e-06) hsa-miR-643 (7.9e-05) hsa-let-7a (0.00014) hsa-let-7f (0.00095) hsa-miR-21 (0.0011) hsa-miR-34a (0.0083)
REACTOME_G_ALPHA_Z_SIGNALLING_EVENTS	GNAI1 ADCY2 ADCY8 ADCY9		hsa-miR-130b (6.8e-23) hsa-miR-19a (5.9e-14) hsa-miR-130a (1.2e-09) hsa-miR-301 (1.3e-09) hsa-miR-19b (2.6e-09) hsa-miR-181b (1e-07) hsa-miR-485-3p (8.9e-07) hsa-miR-182 (2e-05) hsa-miR-181a (0.0081)
REACTOME_APCDC20_MEDIATED_DEGRADATION_OF_CYCLIN_B	ANAPC1 UBE2C CCNB1 CDC23 CDC20 ANAPC11		hsa-miR-495 (2.2e-14) hsa-miR-766 (0.0003)
REACTOME_REGULATION_OF_ORNITHINE_DECARBOXYLASE	ODC1 PSMD14 PSMD12 PSMA6 PSMA5 PSMA4 PSMA7 PSMB5 PSMB4 PSMB2 PSMC4 PSMC2 PSMD1 PSMD2 PSMD4 PSME2		hsa-miR-132 (1.5e-32) hsa-miR-212 (3.8e-31) hsa-miR-802 (2.8e-22) hsa-miR-507 (1.2e-05) hsa-miR-620 (1.6e-05) hsa-miR-765 (6.1e-05)
REACTOME_EXTENSION_OF_TELOMERES	LIG1 FEN1 DKC1 PCNA POLA1 POLA2 POLE2 POLD1 PRIM1 PRIM2 POLE RFC5 RFC3 RFC4 RFC2	*	hsa-miR-154 (3.3e-102) hsa-miR-610 (3.1e-46) hsa-miR-134 (6.5e-44) hsa-miR-515-5p (4.3e-21) hsa-miR-217 (5.6e-13)
REACTOME_HEMOSTASIS	APP PIK3CG BSG F5 F3 TFPI KLKB1 GAS6 LYN IGF1 GNA14 GNA11 GNA12 TGFB3 PRCP STXBP3 SLC7A11 CD2 SELPLG FIGF MAG CD48 VEGFC CD36 PPBP PLAT PLA2G4A PDPK1 AMICA1 FYN PDGFA F13A1 MMRN1 ITGAL CAV1 ITGAV ITGA2 ITGA6 PROS1 PIK3R1 A2M GNG2 GNG7 SIRPA GNAI1 HGF GNB5 GNG11 APBB1IP DGKB DGKG SELP PLG P2RY12 SLC7A8 THBD FGA FGB TEK JAM2 JAM3 LCP2 PSAP RAPGEF4 CFD F10 ITPR1 ITPR2 CALM2 CALM1 CLU SRGN MGLL ESAM …		hsa-miR-19a (9.5e-18) hsa-miR-301 (8.9e-11) hsa-miR-101 (1.5e-10) hsa-miR-130a (3.5e-09) hsa-miR-96 (3.8e-09) hsa-miR-203 (1.8e-07) hsa-miR-181b (3.5e-06) hsa-miR-142-5p (3.5e-06) hsa-miR-9 (3.8e-06) hsa-miR-372 (5.7e-06) hsa-miR-19b (2.8e-05) hsa-miR-206 (5.2e-05) hsa-miR-485-3p (0.00031) hsa-miR-106b (0.00053) hsa-miR-23b (0.0007) hsa-miR-218 (0.00094) hsa-miR-27b (0.0021) hsa-miR-130b (0.0029)…
REACTOME_INTEGRIN_ALPHAIIBBETA3_SIGNALING	ITGB3 RAP1A RAP1B VWF APBB1IP FGG FGA FGB RAPGEF4 RASGRP3 RASGRP2 CRK		hsa-miR-301 (8.9e-08) hsa-miR-142-5p (4.5e-05) hsa-miR-130a (0.00028) hsa-miR-19a (0.0028) hsa-miR-130b (0.0029) hsa-miR-101 (0.0042)
REACTOME_RNA_POLYMERASE_I_PROMOTER_OPENING	HIST1H4K HIST1H4A HIST1H4F HIST1H4I HIST1H4J HIST1H4H HIST1H3J HIST1H3A HIST1H3B HIST1H3F HIST1H3H H2BFS HIST3H2BB HIST2H2AA3 HIST1H2BO HIST1H2BM HIST1H2BN HIST1H2BK HIST1H2BL HIST1H2BI HIST1H2BJ HIST2H2AC HIST2H2BE HIST1H2AB HIST1H2AC HIST1H2AD HIST1H2AE HIST1H2BB HIST1H2BD HIST1H2BE HIST1H2BF HIST1H2BG HIST1H2BH HIST1H2AK H2AFZ H2AFX HIST4H4	*	hsa-miR-212 (1.2e-177) hsa-miR-802 (1.5e-146) hsa-miR-132 (7.2e-128) hsa-miR-24 (2.1e-10) hsa-miR-328 (1.3e-09) hsa-miR-584 (6.4e-07) hsa-miR-200a (0.00014) hsa-miR-659 (0.0028)
REACTOME_VIF_MEDIATED_DEGRADATION_OF_APOBEC3G	TCEB1 PSMD14 PSMD12 PSMA6 PSMA5 PSMA4 PSMA7 PSMB5 PSMB4 PSMB2 PSMC4 PSMC2 PSMD1 PSMD2 PSMD4 PSME2		hsa-miR-212 (2e-51) hsa-miR-802 (5.6e-38) hsa-miR-132 (2.9e-18) hsa-miR-507 (1.1e-08) hsa-miR-765 (0.00027) hsa-miR-620 (0.00042) hsa-miR-555 (0.0045)
REACTOME_SOS_MEDIATED_SIGNALLING	IRS1		hsa-miR-145 (0.0035)
REACTOME_EICOSANOID_LIGAND_BINDING_RECEPTORS	CYSLTR1 CYSLTR2 TBXA2R PTGER2 PTGER4 PTGDR PTGFR GPR44		hsa-miR-23b (2e-08) hsa-miR-367 (0.0011) hsa-miR-145 (0.0017)
REACTOME_TRANSCRIPTION_COUPLED_NER	LIG1 ERCC6 PCNA GTF2H4 POLE2 POLD1 POLE RFC5 RFC3 RFC4 RFC2 POLR2H POLR2G POLR2K POLR2J POLR2D	*	hsa-miR-154 (7e-40) hsa-miR-134 (2.1e-24) hsa-miR-217 (2.3e-18) hsa-let-7c (0.00023) hsa-let-7g (0.00027) hsa-let-7i (0.00043) hsa-let-7f (0.00074)
REACTOME_G1_S_TRANSITION	DBF4 E2F1 E2F2 E2F3 FBXO5 DHFR CKS1B TYMS CCNA2 SKP2 ORC1L PCNA CCNE2 CCNE1 CDC7 CDC6 RRM2 POLA2 CCNB1 POLE2 ORC6L CDK2 ORC2L CDC25A PRIM1 PRIM2 POLE CDT1 PSMD14 PSMD12 MCM10 PSMA6 PSMA5 PSMA4 PSMA7 PSMB5 PSMB4 PSMB2 PSMC2 MCM8 MCM7 PSMD2 PSMD4 MCM2 MCM3 MCM4 MCM5 MCM6 PSME2	*	hsa-miR-802 (5.1e-80) hsa-miR-132 (1.4e-38) hsa-miR-154 (1.5e-36) hsa-miR-503 (4.2e-29) hsa-miR-212 (2.5e-27) hsa-miR-507 (2.3e-24) hsa-miR-643 (1.4e-17) hsa-miR-765 (1.1e-16) hsa-miR-519a (1.8e-16) hsa-miR-21 (5.5e-15) hsa-let-7a (7.3e-12) hsa-miR-34a (8.2e-12) hsa-miR-10a (1.6e-10) hsa-miR-210 (4e-10) hsa-miR-138 (4.1e-10) hsa-miR-205 (1.7e-06) hsa-miR-140 (2.1e-06) hsa-let-7g (2.2e-06) hsa-miR…
REACTOME_SIGNALING_IN_IMMUNE_SYSTEM	MEF2C MEF2A PIK3C3 KLRD1 BSG CRTAM MAPK3 KLRC1 HLA-DRA RAC1 HLA-DOA GAS6 LYN C8A C7 C3 C6 C5 DUSP4 ENAH BCL10 TRA@ HLA-DMB HLA-DMA RAET1E PPP2R1A SLC7A11 CD2 SELPLG MAG CD48 CD3G CD3D CD34 CD58 PTEN PDPK1 LY96 ICAM2 CD160 SIGIRR MAP3K14 AMICA1 FYB FYN CD14 ITGAL CAV1 ITGB3 IRAK4 ITGAV ITGA6 FOS CD96 CHUK CD84 UBE2N PRKCQ CD81 PROS1 MAP3K1 PIK3R1 MASP1 MAP2K7 SIRPA PDCD1LG2 HLA-DPA1 CD226 HLA-DPB1…		hsa-miR-203 (1e-30) hsa-miR-19a (1.7e-16) hsa-miR-96 (1.7e-14) hsa-miR-367 (7.9e-08) hsa-miR-130a (1.8e-07) hsa-miR-301 (2.9e-07) hsa-miR-206 (6.2e-06) hsa-miR-144 (0.00011) hsa-miR-9 (0.00033) hsa-miR-142-5p (0.00049) hsa-miR-181b (0.00053) hsa-miR-302a (0.00065) hsa-miR-130b (0.0011) hsa-miR-424 (0.0011) hsa-miR-302d (0.0015) hsa-miR-485-3p (0.0015) hsa-miR-302b (0.0018) hsa-miR-372 (0.0033)
REACTOME_NA_CL_DEPENDENT_NEUROTRANSMITTER_TRANSPORTERS	SLC22A2 SLC18A2 SLC18A1 SLC6A20 SLC6A11 SLC6A12 SLC6A13 SLC6A14 SLC6A15 SLC6A18 SLC6A1 SLC6A2 SLC6A3 SLC6A9 SLC6A7 SLC6A5 SLC6A6		hsa-miR-218 (1.3e-07) hsa-miR-137 (0.00021) hsa-miR-183 (0.00052) hsa-miR-200c (0.0028) hsa-miR-32 (0.0032) hsa-miR-142-5p (0.0034)
REACTOME_CASPASE_MEDIATED_CLEAVAGE_OF_CYTOSKELETAL_PROTEINS	GAS2 CASP7 DBNL VIM ADD1 GSN		hsa-miR-506 (2.2e-05) hsa-miR-23b (0.004)
REACTOME_CONVERSION_FROM_APC_CDC20_TO_APC_CDH1_IN_LATE_ANAPHASE	ANAPC1 UBE2C CDC23 CDC20 ANAPC11		hsa-miR-495 (0.0001) hsa-miR-766 (0.0046)
REACTOME_AMINO_ACID_SYNTHESIS_AND_INTERCONVERSION	GPT2 PYCR1 ASNS GOT1		hsa-miR-30c (0.0079)
REACTOME_HORMONE_SENSITIVE_LIPASE_HSL_MEDIATED_TRIACYLGLYCEROL_HYDROLYSIS	FABP4 PRKACB CAV1 PPP1CB MGLL		hsa-miR-142-5p (4e-19) hsa-miR-23b (5e-17) hsa-miR-203 (1.9e-15) hsa-miR-92 (2.8e-09) hsa-miR-181b (4.2e-09) hsa-miR-106b (5.9e-06) hsa-miR-324-3p (1.3e-05) hsa-miR-96 (6.2e-05) hsa-miR-218 (8.5e-05) hsa-miR-19b (0.00012) hsa-miR-32 (0.00026) hsa-miR-182 (0.00043) hsa-miR-19a (0.001) hsa-miR-206 (0.0088)
REACTOME_MRNA_DECAY_BY_5_TO_3_EXORIBONUCLEASE	EDC3 LSM5 LSM4 LSM3 LSM2 XRN1		hsa-miR-10b (5.5e-09) hsa-miR-342 (0.00074) hsa-miR-30b (0.0023)
REACTOME_GLUCONEOGENESIS	PGAM1 PGAM2 PC MDH2 MDH1 ALDOA SLC25A12 SLC25A13 SLC25A10 GAPDH PCK2 GOT1 PFKFB4 PFKFB2 PFKFB1 TPI1 PGK1 ENO2 ENO3 ENO1 GPI		hsa-miR-34c (2.2e-07) hsa-miR-122a (0.0047)
REACTOME_CDT1_ASSOCIATION_WITH_THE_CDC6_ORC_ORIGIN_COMPLEX	ORC1L CDC6 ORC6L ORC2L CDT1 PSMD14 PSMD12 PSMA6 PSMA5 PSMA4 PSMA7 PSMB5 PSMB4 PSMB2 PSMC4 PSMC2 MCM8 PSMD1 PSMD2 PSMD4 PSME2	*	hsa-miR-802 (4.6e-69) hsa-miR-212 (1.6e-52) hsa-miR-132 (5.5e-47) hsa-miR-507 (8.4e-18) hsa-miR-765 (1.2e-11) hsa-miR-620 (2.2e-09) hsa-miR-30c (6.6e-08) hsa-miR-643 (1.2e-05) hsa-miR-555 (0.00087)
REACTOME_SPHINGOLIPID_METABOLISM	SGMS1 CSNK1G2 SGPP1 PPAP2C PRKD1 PPAP2A PPAP2B SPTLC1 VAPA		hsa-miR-142-5p (6.6e-11) hsa-miR-106b (7.5e-06) hsa-miR-375 (7e-05) hsa-miR-32 (0.00091) hsa-miR-17-5p (0.003)
REACTOME_NUCLEAR_EVENTS_KINASE_AND_TRANSCRIPTION_FACTOR_ACTIVATION	MEF2C MEF2A MAPK3 PPP2R1A PPP2CB RPS6KA5 RPS6KA3 RPS6KA2 MAPK11		hsa-miR-214 (6.4e-12) hsa-miR-130b (1.3e-11) hsa-miR-203 (1e-07) hsa-miR-19b (3.7e-06) hsa-miR-130a (1.4e-05) hsa-miR-142-5p (0.00036) hsa-miR-19a (0.0014) hsa-miR-30e-3p (0.0036) hsa-miR-302a (0.0053) hsa-miR-211 (0.0099)
REACTOME_REGULATION_OF_GENE_EXPRESSION_IN_BETA_CELLS	RPLP0 FOXA2 RPS27A RPL10A RPL13A FOXO1 RPL18 RPL19 RPL14 RPL13 RPL15 RPL10 RPL11 RPL12 HNF4G RPS14 RPS15 RPS13 RPS25 RPS27 RPS23 RPS24 RPS9 RPS6 RPS5 RPS8 HNF1A RPL41 RPL3L RPL36 RPL34 RPL26 RPL27 RPL28 RPL23 RPL21 RPL6 RPL9 RPL3 RPL5 RPL4 RPL7A RPL23A RPS3A RPS4X RPS15A AKT3		hsa-miR-142-5p (2.7e-34) hsa-miR-203 (2.3e-24) hsa-miR-106b (8.9e-17) hsa-miR-17-5p (0.00022) hsa-miR-376a (0.002) hsa-miR-20b (0.0039)
REACTOME_FORMATION_AND_MATURATION_OF_MRNA_TRANSCRIPT	CCAR1 SFRS11 DHX9 YBX1 TAF11 TAF13 THOC4 SF3B1 SF3A3 TXNL4A NCBP2 NCBP1 SNRPD3 SNRPD1 SNRPD2 PABPN1 PRPF4 PRPF6 SF3B14 FUS SUPT16H TH1L LSM2 UPF3B GTF2H4 TCEB3 TCEB1 GTF2E1 SNRPA1 HNRNPA2B1 SNRPB2 HNRNPL HNRNPC TAF4 TAF5 WHSC2 CPSF3 CPSF1 RBM8A SFRS9 U2AF1 SUPT5H SFRS1 SFRS2 PCF11 ELL CCNT1 POLR2H POLR2G POLR2K POLR2J POLR2D SF4 SNRPB SNRPF SNRPE SNRPG CSTF2 RNPS1 CSTF1	*	hsa-miR-212 (8.6e-54) hsa-miR-132 (6.2e-49) hsa-miR-10a (4.2e-47) hsa-miR-802 (7.2e-46) hsa-miR-320 (1.2e-22) hsa-miR-495 (4e-21) hsa-miR-507 (3.2e-20) hsa-miR-432 (5.9e-19) hsa-miR-134 (1.9e-17) hsa-miR-10b (7.8e-16) hsa-miR-190 (2.4e-14) hsa-miR-217 (4.3e-07) hsa-miR-216 (8.1e-07) hsa-miR-34c (1.6e-06) hsa-miR-133a (2.3e-06) hsa-let-7e (3.4e-06) hsa-miR-194 (1.3e-05) hsa-miR-338 (3.4e-05) hsa-m…
REACTOME_CD28_DEPENDENT_PI3K_AKT_SIGNALING	PDPK1 FYN PIK3R1 AKT3		hsa-miR-203 (1.4e-15) hsa-miR-106b (5.5e-15) hsa-miR-17-5p (2.4e-06) hsa-miR-375 (0.00084)
REACTOME_GLUCOSE_AND_OTHER_SUGAR_SLC_TRANSPORTERS	SLC13A5 SLC13A2 SLC13A3 SLC41A1 SLC47A1 SLC47A2 SLC16A7 SLC39A8 SLC39A6 SLC44A1 SLC44A3 SLC44A4 SLC6A20 SLC2A7 SLC2A5 SLC2A4 SLC40A1 SLC6A13 SLC6A14 SLC2A9 SLC2A12 SLC2A13 SLC2A10 SLC2A11 SLC6A1 SLC6A2 SLC30A1 SLC30A5 SLC10A6		hsa-miR-301 (5.2e-14) hsa-miR-130a (1.2e-05) hsa-miR-32 (3.6e-05) hsa-miR-206 (0.00038) hsa-miR-16 (0.00068) hsa-miR-130b (0.00096) hsa-miR-372 (0.0023) hsa-miR-218 (0.0046) hsa-miR-106a (0.0047) hsa-miR-183 (0.0056) hsa-miR-200c (0.0088)
REACTOME_ENDOGENOUS_STEROLS	CYP1B1 CYP7B1 CYP39A1 CYP27A1		hsa-miR-27b (0.00011)
REACTOME_RNA_POLYMERASE_III_TRANSCRIPTION_INITIATION_FROM_TYPE_2_PROMOTER	LZTS1 BRF1 GTF3C2 GTF3C4 GTF3C3 POLR2H POLR2F POLR2K POLR3A POLR3E		hsa-miR-504 (1e-16) hsa-miR-580 (0.00011)
REACTOME_G_ALPHA_S_SIGNALLING_EVENTS	MC4R PTGER2 PTGER4 PTGDR VIPR2 FSHR GNG2 GNG7 GNAI1 PDE10A GNB5 GNG11 PDE1A PDE2A PDE4A RLN2 PDE4D DRD1 PDE8B ADRB2 ADCY4 ADCY2 ADCY8 POMC ADCY9 TAAR1 CALCRL RAMP1 RAMP2		hsa-miR-301 (2.5e-16) hsa-miR-203 (2.7e-15) hsa-miR-19a (7.1e-08) hsa-miR-101 (3.7e-07) hsa-miR-23b (7e-07) hsa-miR-20b (1.1e-06) hsa-miR-130a (2.6e-06) hsa-miR-106b (9e-06) hsa-miR-485-3p (2.2e-05) hsa-miR-19b (2.6e-05) hsa-miR-32 (0.00011) hsa-miR-302a (0.00015) hsa-miR-367 (0.00026) hsa-miR-375 (0.00035) hsa-miR-137 (0.00043) hsa-miR-130b (0.0026)
REACTOME_MITOCHONDRIAL_TRNA_AMINOACYLATION	SARS2 GARS AARS2 PARS2 MARS2 VARS2 TARS2 DARS2 YARS2 NARS2		hsa-miR-205 (2.3e-12)
REACTOME_DARPP32_EVENTS	PPP3CB PPP3CC PPP3CA PPP2R1A PRKACB PPP1R1B PPP2CB PDE4A PDE4D PRKAR1A CALM2 CALM1 PPP3R1		hsa-miR-19b (5.8e-59) hsa-miR-203 (7.1e-18) hsa-miR-96 (5.2e-08) hsa-miR-101 (1.1e-07) hsa-miR-130b (2.3e-07) hsa-miR-375 (1.3e-06) hsa-miR-32 (3.6e-06) hsa-miR-106a (6e-06) hsa-miR-372 (2.4e-05) hsa-miR-301 (2.8e-05) hsa-miR-15a (2.9e-05) hsa-miR-144 (8.5e-05) hsa-miR-19a (0.0001) hsa-miR-145 (0.0005) hsa-miR-137 (0.00076) hsa-miR-181b (0.00083) hsa-miR-130a (0.00087) hsa-miR-214 (0.0013) hsa-mi…
REACTOME_P75NTR_SIGNALS_VIA_NFKB	IRAK1 PRKCI RIPK2		hsa-miR-134 (2e-07)
REACTOME_REPAIR_SYNTHESIS_OF_PATCH_27_30_BASES_LONG_BY_DNA_POLYMERASE	PCNA POLE2 POLD1 POLE RFC5 RFC3 RFC4 RFC2	*	hsa-miR-134 (2.2e-95) hsa-miR-154 (1.6e-72) hsa-miR-217 (2.5e-28)
REACTOME_LOSS_OF_NLP_FROM_MITOTIC_CENTROSOMES	CSNK1D MAPRE1 TUBA4A NEK2 YWHAG CEP72 CEP78 PCNT OFD1 AZI1 TUBB PLK4 PLK1 CEP152 CEP164 CKAP5 CENPJ		hsa-miR-212 (2.8e-10) hsa-miR-132 (1.1e-07) hsa-miR-216 (0.0016) hsa-let-7g (0.0033) hsa-let-7a (0.008)
REACTOME_METABOLISM_OF_AMINO_ACIDS	HSD17B10 ALDH4A1 GPT2 MCCC2 MCCC1 PYCR1 AGMAT SLC25A15 ODC1 SHMT1 FTCD SLC7A9 HAL ASNS SLC36A2 GOT1 GCDH SLC16A10 SLC25A2 CKM BCAT1 PSMD14 PSMD12 PSMA6 PSMA5 PSMA4 SLC38A1 SLC38A3 SLC38A2 PSMA7 PSMB5 PSMB4 PSMB2 PSMC4 PSMC2 TDO2 PSMD1 PSMD2 PSMD4 ALDH7A1 PSME2 SMS		hsa-miR-212 (8.2e-11) hsa-miR-132 (1.6e-07) hsa-miR-765 (0.0006) hsa-miR-802 (0.00076)
REACTOME_GLUCURONIDATION	UGDH UGP2 UGT2B7 UGT2B28 UGT2B11 UGT2B10		hsa-miR-137 (2.1e-08) hsa-miR-367 (9.2e-05) hsa-miR-92 (0.0012) hsa-miR-32 (0.0033) hsa-miR-92b (0.0038)
REACTOME_CREB_PHOPHORYLATION_THROUGH_THE_ACTIVATION_OF_RAS	PDPK1 CAMK2D NEFL RPS6KA6 RPS6KA2 RASGRF1 CALM2 CALM1		hsa-miR-130b (6.4e-38) hsa-miR-301 (1.2e-37) hsa-miR-130a (7e-26) hsa-miR-23b (2.7e-09) hsa-miR-27b (1.5e-06) hsa-miR-31 (2.4e-06) hsa-miR-32 (5.3e-06) hsa-miR-200c (1.6e-05) hsa-miR-92b (6.2e-05) hsa-miR-561 (6.3e-05) hsa-miR-770-5p (0.00036) hsa-miR-375 (0.0015)
REACTOME_RNA_POLYMERASE_III_TRANSCRIPTION_INITIATION	LZTS1 BRF1 GTF3C2 GTF3C4 GTF3C3 POU2F1 POLR2H POLR2F POLR2K POLR3A POLR3E		hsa-miR-515-5p (7.4e-19) hsa-miR-504 (4.9e-06) hsa-miR-205 (0.00062) hsa-miR-580 (0.0039)
REACTOME_G_ALPHA_Q_SIGNALLING_EVENTS	AGTR1 GNA14 GNA11 CYSLTR2 P2RY1 HRH1 EDN1 BDKRB2 GRK5 AGT PTGFR TRH PIK3R1 GNG2 GNG7 AVPR1A GNB5 GPR65 GNG11 GNG12 DGKB CCL23 DGKG P2RY10 NMBR HTR2B HTR2A XCL1 XCL2 CHRM1 ANXA1 EDNRA EDNRB ITPR1 ITPR2 PLCB4 MGLL NTS		hsa-miR-301 (1.7e-10) hsa-miR-130b (2.8e-10) hsa-miR-203 (8.2e-10) hsa-miR-19a (1.7e-08) hsa-miR-130a (4.1e-08) hsa-miR-106b (8.3e-08) hsa-miR-32 (1.1e-06) hsa-miR-23b (4.4e-06) hsa-miR-206 (1.3e-05) hsa-miR-9 (9.7e-05) hsa-miR-19b (0.00091) hsa-miR-106a (0.00099) hsa-miR-302a (0.001) hsa-miR-142-5p (0.0022) hsa-miR-183 (0.0045)
REACTOME_NCAM_SIGNALING_FOR_NEURITE_OUT_GROWTH	HRAS NRAS SPTB PTK2 CNTN2 COL9A1 COL9A2 COL9A3 COL5A2 COL5A1 KRAS ARTN YWHAB SPTBN5 SPTBN2 SOS1 COL1A1 NCAN COL4A1 AGRN COL2A1		hsa-let-7b (1.2e-05) hsa-miR-134 (0.00032) hsa-let-7c (0.0011) hsa-let-7i (0.0016) hsa-miR-217 (0.0021)
REACTOME_PECAM1_INTERACTIONS	LYN FYN ITGB3 ITGAV YES1		hsa-miR-145 (2.6e-07) hsa-miR-92 (3.7e-05) hsa-miR-32 (0.0001) hsa-miR-182 (0.00072) hsa-miR-183 (0.0015)
REACTOME_GENE_EXPRESSION	MED20 RAE1 MED26 CCAR1 MED14 MED13 SARS2 SFRS11 DHX9 ESRRA GARS YBX1 TAF11 TAF13 EIF4A1 THOC4 NUP107 AARS2 SF3B1 PARS2 MARS2 SF3A3 TXNL4A NCBP2 NCBP1 SNRPD3 SNRPD1 SNRPD2 EIF4EBP1 PABPN1 NR2C2 VARS2 PRPF4 PRPF6 TARS2 SF3B14 FUS MAML1 NR1I3 NR1I2 RPL18A SUPT16H SEH1L FARSA EIF5B TH1L EIF3B TARS NUP155 LSM2 YARS RXRB AAAS EIF2S2 RPS26 UPF3B GTF2H4 DARS2 NUP205 RPL37 NUP214 NUP210 TCEB3 TCEB1 GTF2E1…		hsa-miR-212 (2.6e-12) hsa-miR-507 (0.0001) hsa-miR-134 (0.00017) hsa-miR-132 (0.0004) hsa-miR-34c (0.0028) hsa-miR-432 (0.0038) hsa-miR-10a (0.0042) hsa-miR-802 (0.0057) hsa-miR-21 (0.0069) hsa-miR-10b (0.0069) hsa-miR-216 (0.0078) hsa-let-7b (0.0082)
REACTOME_SMOOTH_MUSCLE_CONTRACTION	SORBS3 SORBS1 ACTG2 ACTA2 MYH11 LMOD1 CALM2 CALM1 MYL9 MYLK TPM2 TPM1		hsa-miR-130a (1.7e-17) hsa-miR-142-5p (4.4e-13) hsa-miR-301 (8.5e-12) hsa-miR-130b (2.1e-11) hsa-miR-302a (1.1e-09) hsa-miR-302d (8.1e-09) hsa-miR-182 (1.6e-06) hsa-miR-218 (1.7e-06) hsa-miR-770-5p (1e-05) hsa-miR-561 (3.4e-05) hsa-miR-214 (0.00023)
REACTOME_PEPTIDE_LIGAND_BINDING_RECEPTORS	AGTR1 AGTR2 SSTR1 C3 C5 FPR1 MC4R CXCL12 GALR1 C3AR1 CCL5 EDN1 C5AR1 CCR6 PPBP CCR2 BDKRB2 AGT TRH CXCR6 NPY5R PENK AVPR1A CCL23 CCL21 CCL19 NPY1R NMBR RLN2 XCL1 XCL2 CCRL1 PF4 ANXA1 CX3CR1 POMC EDNRA EDNRB DARC NTS		hsa-miR-203 (2.1e-07) hsa-miR-101 (0.00013) hsa-miR-23b (0.0016) hsa-miR-200c (0.0018) hsa-miR-302a (0.0049)
REACTOME_GLUCOSE_TRANSPORT	RAE1 NUP107 GCK SEH1L TPR NUP160 NUP155 AAAS NUP205 NUP214 HK3 NUP210 SLC2A1 NUP85 NUP98 NUP93 NUP35 NUP43 NUP62 NUPL2 POM121		hsa-miR-212 (2.2e-28) hsa-miR-132 (3.6e-14) hsa-miR-216 (3.2e-11) hsa-let-7g (1.8e-09) hsa-miR-21 (5.9e-05) hsa-let-7i (0.00013) hsa-let-7f (0.00022) hsa-let-7b (0.00078) hsa-let-7c (0.0019) hsa-let-7e (0.002) hsa-miR-93 (0.0026) hsa-miR-342 (0.0026) hsa-miR-381 (0.0076)
REACTOME_G2_M_TRANSITION	CSNK1D MAPRE1 TUBA4A NEK2 YWHAG CEP72 CEP78 PKMYT1 CCNA2 PCNT OFD1 CCNB1 CCNB2 XPO1 AZI1 TUBB PLK4 PLK1 CDC25C CDC25A CDC25B CEP152 CEP164 CKAP5 CENPJ		hsa-miR-212 (1.2e-15) hsa-miR-132 (1.6e-08) hsa-miR-217 (6.2e-08) hsa-miR-10a (2.3e-06) hsa-miR-21 (7.8e-06) hsa-miR-216 (0.00078) hsa-let-7g (0.0019) hsa-let-7b (0.0036) hsa-miR-503 (0.0058)
REACTOME_LAGGING_STRAND_SYNTHESIS	LIG1 FEN1 PCNA POLA1 POLA2 POLD1 PRIM1 PRIM2 RFC5 RFC3 RFC4 RFC2	*	hsa-miR-154 (1.7e-187) hsa-miR-134 (3.4e-72) hsa-miR-515-5p (2.6e-36) hsa-miR-217 (1.5e-28) hsa-miR-610 (7.8e-28)
REACTOME_INTEGRATION_OF_ENERGY_METABOLISM	PPP2R5D PGAM1 PGAM2 PDHA1 FH ACACA ACACB NDUFB11 PDHX PDK1 PDK3 CS SDHA SDHC CYC1 UQCRQ CYCS UQCRH PKM2 GCK ATP5C1 MDH2 IDH2 TKT ATP5E ATP5I ATP5H ATP5J AGPAT1 STX1A PRKAA1 COX5A COX5B PRKACG PRKACA COX6C COX7B COX8A PRKAG1 PRKAG2 UQCRFS1 PFKP PFKM GAPDH GNG3 GNG5 DLAT NDUFA13 GNAS SLC2A1 ATP5J2 IDH3B CACNA2D2 NDUFV3 NDUFV1 PRKAR1B CACNA1A NDUFS6 NDUFS5 NDUFS8 NDUFS3 NDUFS1 ATP5G1 ADCY7 ADCY5 ADC…		hsa-let-7b (1.7e-10) hsa-miR-134 (7.5e-10) hsa-miR-217 (1.8e-07) hsa-miR-320 (2.9e-06) hsa-miR-503 (1.2e-05) hsa-let-7e (0.00068) hsa-miR-29b (0.0019) hsa-miR-34c (0.0031) hsa-miR-133a (0.0046)
REACTOME_FRS2_MEDIATED_ACTIVATION	HRAS BRAF NRAS FRS2 KRAS YWHAB		hsa-miR-134 (5e-20) hsa-let-7b (3.5e-07) hsa-let-7e (0.00025) hsa-let-7i (0.00031) hsa-let-7c (0.0019) hsa-miR-30d (0.0026) hsa-miR-98 (0.0035) hsa-miR-216 (0.0059) hsa-let-7a (0.0099)
REACTOME_GLUTATHIONE_CONJUGATION	GSTA2 GSTA3 GSTA4 GSTA5 GSTM5 GCLC GCLM GSTO2 GSTO1 MGST1 MGST2		hsa-miR-32 (1.1e-17) hsa-miR-18a (4.1e-06) hsa-miR-92 (0.00028) hsa-miR-18b (0.0031)
REACTOME_RNA_POLYMERASE_III_CHAIN_ELONGATION	LZTS1 POLR2H POLR2K POLR3A POLR3E		hsa-miR-504 (1.3e-06) hsa-miR-580 (1.8e-05)
REACTOME_P2Y_RECEPTORS	P2RY1 P2RY12 P2RY13 P2RY10 P2RY14		hsa-miR-367 (0.0014)
REACTOME_E2F_MEDIATED_REGULATION_OF_DNA_REPLICATION	E2F1 E2F2 E2F3 DHFR TYMS ORC1L PCNA CCNE1 CDC6 RRM2 POLA2 CCNB1 ORC6L ORC2L CDC25A PRIM1 CDT1 MCM8	*	hsa-miR-10b (1.2e-17) hsa-miR-154 (4e-16) hsa-miR-21 (4.7e-12) hsa-miR-10a (6.6e-09) hsa-miR-342 (1.2e-08) hsa-miR-503 (1.9e-08) hsa-miR-515-5p (4.9e-08) hsa-miR-30c (5.2e-08) hsa-miR-643 (3.6e-07) hsa-miR-217 (7e-07) hsa-let-7g (1.1e-06) hsa-let-7i (1.5e-05) hsa-let-7a (0.00052) hsa-miR-124 (0.0012) hsa-let-7d (0.0013) hsa-miR-200a (0.0017) hsa-miR-34a (0.0019) hsa-miR-34c (0.003) hsa-miR-194 (0…
REACTOME_CREB_PHOSPHORYLATION_THROUGH_THE_ACTIVATION_OF_CAMKII	CAMK2D NEFL CALM2 CALM1		hsa-miR-130b (2e-27) hsa-miR-130a (7.4e-11) hsa-miR-301 (9.9e-09) hsa-miR-27b (1.3e-05) hsa-miR-23b (5.5e-05) hsa-miR-27a (8e-05) hsa-miR-23a (0.0011) hsa-miR-32 (0.0069) hsa-miR-31 (0.0082) hsa-miR-770-5p (0.0096)
REACTOME_G_BETA_GAMMA_SIGNALLING_THROUGH_PLC_BETA	GNG2 GNG7 GNB5 GNG11		hsa-miR-106a (0.00027) hsa-miR-17-5p (0.0013) hsa-miR-372 (0.0016)
REACTOME_PD1_SIGNALING	HLA-DQA2 HLA-DQA1 HLA-DRA HLA-DOA HLA-DQB1 TRA@ HLA-DMB HLA-DMA CD3G CD3D PDCD1LG2 HLA-DPA1 HLA-DRB5 HLA-DPB1 LCK CD247		hsa-miR-214 (1.6e-16)
REACTOME_SIGNALLING_BY_NGF	MEF2C SH3GL2 CDKN1A MAG ABR PTEN MCF2L PDPK1 AP2A2 FOXO1 SHC3 SHC2 PIK3R1 RTN4 ARHGEF4 ARHGEF6 PDE1C SOS2 PPP2CB RPS6KA5 RPS6KA2 IRS1 RASGRF1 PRKAR1A APH1B SMPD2 ADCY2 ADCY8 ITPR1 ITPR2 ADCY9 CALM2 CALM1 AKT3		hsa-miR-203 (7.4e-26) hsa-miR-301 (5.1e-13) hsa-miR-130b (7.4e-11) hsa-miR-19a (5.6e-08) hsa-miR-23b (1.6e-07) hsa-miR-19b (7.7e-07) hsa-miR-9 (1.5e-06) hsa-miR-367 (1.7e-06) hsa-miR-130a (3e-06) hsa-miR-142-5p (0.00022) hsa-miR-181b (0.00085) hsa-miR-424 (0.0021) hsa-miR-372 (0.0023) hsa-miR-770-5p (0.005) hsa-miR-153 (0.006)
REACTOME_MUSCLE_CONTRACTION	DMD ACTG2 ACTA2 MYH11 DES VIM LMOD1 CALM2 CALM1 TNNT3 MYLK TPM2		hsa-miR-130b (1e-64) hsa-miR-200c (1.9e-11) hsa-miR-101 (1.1e-10) hsa-miR-301 (3.3e-08) hsa-miR-214 (4.7e-05) hsa-miR-130a (0.00019) hsa-miR-144 (0.00026) hsa-miR-136 (0.00045) hsa-miR-182 (0.0015) hsa-miR-506 (0.0053)
REACTOME_HOST_INTERACTIONS_OF_HIV_FACTORS	RAE1 NUP107 AP2M1 RAN SEH1L PPIA RANBP1 TPR NUP155 AAAS AP1S1 NUP205 NUP214 NUP210 TCEB1 XPO1 ATP6V1H NUP85 HMGA1 NUP35 NUP43 NUP62 CCNT1 SLC25A5 PSMD14 PSMD12 PSMD11 PSMA6 PSMA5 PSMA4 PSMA7 PSMB5 PSMB4 PSMB2 PSMC4 PSMC2 PSMD1 PSMD2 PSMD4 PSME2 POM121		hsa-miR-132 (8.3e-42) hsa-miR-212 (1.1e-08) hsa-miR-134 (4e-07) hsa-miR-216 (4.3e-07) hsa-miR-802 (3.5e-06) hsa-let-7e (0.0037) hsa-miR-507 (0.0039) hsa-let-7i (0.0055)
REACTOME_DOUBLE_STRAND_BREAK_REPAIR	LIG1 ATM RAD52 RAD51 BRCA2 PRKDC H2AFX TDP1		hsa-miR-24 (2e-06) hsa-miR-328 (0.0016)
REACTOME_CYCLIN_E_ASSOCIATED_EVENTS_DURING_G1_S_TRANSITION_	CKS1B CCNA2 SKP2 CCNE2 CCNE1 CDK2 CDC25A PSMD14 PSMD12 PSMA6 PSMA5 PSMA4 PSMA7 PSMB5 PSMB4 PSMB2 PSMC2 PSMD2 PSMD4 PSME2	*	hsa-miR-132 (1e-45) hsa-miR-802 (3.6e-43) hsa-miR-503 (8.2e-20) hsa-let-7e (2.9e-13) hsa-miR-507 (7.1e-13) hsa-miR-21 (3.1e-11) hsa-let-7c (5.4e-09) hsa-miR-212 (5.2e-07) hsa-miR-765 (1.6e-06) hsa-miR-138 (6.1e-06) hsa-let-7b (1.1e-05) hsa-miR-34a (0.00085) hsa-let-7g (0.0025) hsa-miR-449b (0.0026) hsa-let-7a (0.0028)
REACTOME_SIGNALING_BY_VEGF	FIGF VEGFC KDR NRP1 PDGFC PGF FLT4		hsa-miR-142-5p (4.4e-09) hsa-miR-130a (7e-08) hsa-miR-130b (1.7e-07) hsa-miR-301 (4.5e-06) hsa-miR-214 (0.00012) hsa-miR-579 (0.00013) hsa-miR-376b (0.00082) hsa-miR-376a (0.0016)
REACTOME_REGULATION_OF_INSULIN_LIKE_GROWTH_FACTOR_ACTIVITY_BY_INSULIN_LIKE_GROWTH_FACTOR_BINDING_PROTEINS	IGF1 MMP2 PAPPA IGFBP6 IGFBP1 IGFBP4 IGFBP5 PAPPA2 PLG CTSL1		hsa-miR-101 (9.4e-20) hsa-miR-203 (4.7e-13) hsa-miR-142-5p (2.2e-10) hsa-miR-214 (7.8e-06) hsa-miR-15b (0.00015) hsa-miR-96 (0.0013) hsa-miR-137 (0.0083)
REACTOME_SIGNALING_BY_WNT	PPP2R5B GSK3B PSMD14 PSMD12 PSMA6 PSMA5 PSMA4 PSMA7 PSMB5 PSMB4 PSMB2 AXIN1 PSMC4 PSMC2 PSMD1 PSMD2 PSMD4 PSME2		hsa-miR-802 (6.9e-24) hsa-miR-212 (2.6e-21) hsa-miR-132 (1.9e-15) hsa-miR-620 (0.00095) hsa-miR-507 (0.0022)
REACTOME_SIGNALLING_TO_ERKS	HRAS BRAF NRAS RALA FRS2 MAPKAPK3 MAPKAPK2 KRAS NTRK1 RIT1 YWHAB GRB2 SHC1 SOS1 MAPK13 MAPK14		hsa-miR-217 (3.7e-05) hsa-let-7b (0.00025) hsa-miR-134 (0.0013) hsa-miR-10b (0.003) hsa-let-7e (0.0035) hsa-miR-216 (0.0052)
REACTOME_COMPLEMENT_CASCADE	C7 C6 C5 MASP1 CFD		hsa-miR-125b (0.009)
REACTOME_CLATHRIN_DERIVED_VESICLE_BUDDING	SH3GL2 SNAP23 ARRB1 VAMP2 GBF1 RAB5C PLDN SNX9 SNX2 YIPF6 CLTC CLINT1 TGOLN2 AP3S1 AP1S2 AP1G1 PUM1 HSPA8 TBC1D8B AP1B1 AP3B1 CPD NAPA SH3D19		hsa-miR-203 (1.2e-14) hsa-miR-19b (3.8e-13) hsa-miR-19a (1e-07) hsa-miR-130b (3e-07) hsa-miR-301 (1.2e-06) hsa-miR-101 (0.00038) hsa-miR-9 (0.0023) hsa-miR-96 (0.0031) hsa-miR-130a (0.0039) hsa-miR-92 (0.0081)
REACTOME_TRNA_AMINOACYLATION	SARS2 WARS2 GARS AARS2 PARS2 MARS2 VARS2 WARS TARS2 FARSB FARSA EEF1E1 CARS TARS YARS DARS2 MARS YARS2 NARS2 VARS AARS EPRS LARS	*	hsa-miR-30b (8e-05)
REACTOME_MAP_KINASES_ACTIVATION_IN_TLR_CASCADE	MEF2C MEF2A MAPK3 PPP2R1A MAP2K7 MAP2K4 PPP2CB RPS6KA5 RPS6KA3 RPS6KA2 MAPK11 MAPK10 TLR3		hsa-miR-142-5p (1.8e-08) hsa-miR-23b (1.9e-08) hsa-miR-203 (7.6e-07) hsa-miR-130b (2.8e-06) hsa-miR-130a (5.1e-06) hsa-miR-19b (0.00016) hsa-miR-372 (0.00036) hsa-miR-9 (0.0061) hsa-miR-182 (0.0067)
REACTOME_METABOLISM_OF_CARBOHYDRATES	PGAM1 PGAM2 RAE1 PHKG2 NUP107 PHKA1 PC TREH PKM2 GCK MDH2 MDH1 ALDOA TKT SEH1L RPIA KHK SLC25A12 SLC25A13 SLC25A10 TPR PFKP PFKM NUP160 GAPDH NUP155 PGD AAAS RPE NUP205 NUP214 HK3 NUP210 PCK2 SLC2A1 NUP85 LCT NUP98 NUP93 GOT1 NUP35 PGM1 NUP43 PFKFB4 PFKFB2 PFKFB1 TPI1 NUP62 GALK1 PGK1 PYGB NUPL2 GALE GALT POM121 ENO2 ENO3 ENO1 GPI		hsa-miR-212 (2e-18) hsa-miR-132 (1.9e-10) hsa-miR-21 (1e-09) hsa-let-7b (2.4e-06) hsa-miR-216 (4.1e-06) hsa-miR-93 (1.8e-05) hsa-let-7f (0.00028) hsa-miR-342 (0.0028) hsa-miR-34c (0.0035) hsa-let-7g (0.006) hsa-let-7c (0.0093)
REACTOME_FURTHER_PLATELET_RELEASATE	TUBA4A CALU PPIA BRPF3 VCL APOA1		hsa-miR-132 (9.3e-15) hsa-miR-212 (0.0026)
REACTOME_OPIOID_SIGNALLING	PPP3CB PPP3CC PPP3CA GNA14 GNA11 PPP2R1A PLA2G4A PRKACB GNG2 GNG7 GNAI1 GNB5 GNG11 PDE1C PDE1A PPP2CB PDE4A PDE4D PRKAR1A ADCY4 ADCY2 ADCY8 POMC ITPR1 ITPR2 ADCY9 CALM2 CALM1 PLCB4 PPP3R1		hsa-miR-301 (2.7e-23) hsa-miR-19b (1.6e-22) hsa-miR-181b (6.5e-14) hsa-miR-32 (2.3e-11) hsa-miR-19a (2.6e-11) hsa-miR-144 (2.9e-08) hsa-miR-23b (1.1e-07) hsa-miR-130a (3.6e-07) hsa-miR-203 (4.6e-06) hsa-miR-367 (3.1e-05) hsa-miR-101 (0.00015) hsa-miR-214 (0.00031) hsa-miR-218 (0.00048) hsa-miR-372 (0.0009) hsa-miR-302b (0.0012) hsa-miR-130b (0.0012) hsa-miR-206 (0.0014) hsa-miR-96 (0.0015) hsa-mi…
REACTOME_TRANSPORT_OF_THE_SLBP_INDEPENDENT_MATURE_MRNA	RAE1 THOC4 NUP107 NCBP2 NCBP1 SEH1L TPR NUP155 AAAS NUP205 NUP214 NUP210 NUP85 NUP35 NUP43 NUP62 POM121		hsa-miR-212 (2.1e-44) hsa-miR-132 (2.9e-25) hsa-miR-216 (1.3e-17) hsa-let-7g (3.4e-09) hsa-miR-342 (3.3e-08) hsa-let-7c (5.8e-08) hsa-miR-514 (1.9e-06) hsa-let-7e (3.7e-06) hsa-miR-21 (2.9e-05) hsa-let-7b (3.2e-05) hsa-miR-93 (8.9e-05) hsa-let-7i (0.00063) hsa-let-7f (0.0045) hsa-miR-371 (0.008)
REACTOME_HIV1_TRANSCRIPTION_ELONGATION	NCBP2 NCBP1 SUPT16H GTF2H4 TCEB3 TCEB1 WHSC2 SUPT5H ELL CCNT1 POLR2H POLR2G POLR2K POLR2J POLR2D		hsa-miR-212 (5.9e-36) hsa-miR-132 (1.1e-32) hsa-miR-495 (1.6e-11) hsa-miR-30b (1e-08) hsa-miR-24 (4.1e-07) hsa-miR-30d (0.00057) hsa-miR-133b (0.0031)
REACTOME_COSTIMULATION_BY_THE_CD28_FAMILY	RAC1 LYN TRA@ HLA-DMA PPP2R1A CD3G CD3D PDPK1 MAP3K14 FYN PIK3R1 HLA-DPA1 HLA-DPB1 PPP2CB TNFRSF14 AKT3 CD247		hsa-miR-203 (5.7e-08) hsa-miR-485-3p (7.8e-07) hsa-miR-27b (3e-05) hsa-miR-301 (0.00086) hsa-miR-369-3p (0.00098) hsa-miR-214 (0.0013) hsa-miR-15a (0.0066)
REACTOME_UNWINDING_OF_DNA	GINS1 GINS2 GINS4 MCM8 MCM7 MCM2 MCM3 MCM4 MCM6	*	hsa-miR-519a (3.1e-08)
REACTOME_INHIBITION_OF_INSULIN_SECRETION_BY_ADRENALINE_NORADRENALINE	CACNB2 GNG2 GNG7 GNAI1 GNB5 GNG11 CACNA1D		hsa-miR-485-3p (1.2e-09) hsa-miR-19a (1.7e-06) hsa-miR-181b (3.6e-06) hsa-miR-302a (6.1e-06) hsa-miR-182 (9.3e-06) hsa-miR-19b (2.5e-05) hsa-miR-20b (0.0068)
REACTOME_FANCONI_ANEMIA_PATHWAY	FANCD2 PALB2 FANCM FANCI FANCE FANCG FANCA FANCB FANCC BRCA2 UBE2T	*	hsa-miR-503 (1.4e-09)
REACTOME_IONOTROPIC_ACTIVITY_OF_KAINATE_RECEPTORS	NCALD CALM2 CALM1		hsa-miR-130b (3.2e-19) hsa-miR-130a (1.1e-17) hsa-miR-19a (2.2e-10) hsa-miR-301 (9e-06) hsa-miR-19b (0.00013) hsa-miR-770-5p (0.0011) hsa-miR-136 (0.0041) hsa-miR-182 (0.0078) hsa-miR-181c (0.0092)
REACTOME_SEMAPHORIN_INTERACTIONS	ARHGEF12 SEMA6A NRP1 FYN ROCK1 RRAS MYH11 FES DPYSL2 HSP90AA1 PTPRC		hsa-miR-130a (3.5e-29) hsa-miR-130b (3e-06) hsa-miR-301 (0.00017) hsa-miR-96 (0.0015) hsa-miR-376a (0.0063)
REACTOME_METABOLISM_OF_RNA	RAE1 PABPC1 EIF4A1 NUP107 NCBP2 NCBP1 SNRPD3 SNRPD1 SNRPD2 EDC3 SEH1L TPR GEMIN6 GEMIN7 GEMIN5 NUP155 LSM5 LSM4 LSM3 LSM2 AAAS EXOSC9 EXOSC4 EXOSC5 EXOSC3 NUP205 NUP214 NUP210 CNOT3 CNOT2 CNOT6 DDX20 XRN1 NUP85 DCPS NUP35 CLNS1A NUP43 NUP62 PARN NUPL2 SNRPB SNRPF SNRPE SNRPG EIF4G1 POM121	*	hsa-miR-132 (3e-45) hsa-miR-212 (7.3e-20) hsa-miR-21 (3.7e-16) hsa-miR-495 (2.2e-11) hsa-miR-10a (2.5e-11) hsa-miR-216 (7.6e-10) hsa-let-7f (4.6e-06) hsa-miR-34a (2e-05) hsa-miR-342 (2.3e-05) hsa-let-7b (8.7e-05) hsa-miR-503 (0.00017) hsa-let-7c (0.00025) hsa-miR-34c (0.0017)
REACTOME_COMMON_PATHWAY	F5 F13A1 PROS1 THBD FGA FGB PF4 F10		hsa-miR-101 (9.8e-12) hsa-miR-586 (8.5e-05) hsa-miR-335 (0.00054) hsa-miR-182 (0.00056) hsa-miR-144 (0.0054)
REACTOME_INACTIVATION_OF_APC_VIA_DIRECT_INHIBITION_OF_THE_APCOMPLEX	ANAPC1 UBE2C BUB3 MAD2L1 CDC23 CDC20 ANAPC11 BUB1B		hsa-miR-495 (4.3e-13) hsa-miR-766 (4.8e-08)
REACTOME_PYRUVATE_METABOLISM_AND_TCA_CYCLE	LDHB PDHA1 FH PDHX PDK1 PDK3 CS SDHA SDHC MDH2 IDH2 SLC16A3 SLC16A1 DLAT IDH3B		hsa-let-7b (0.00065) hsa-miR-320 (0.00073) hsa-let-7c (0.0026) hsa-let-7i (0.0033) hsa-miR-34c (0.0035) hsa-let-7g (0.0048)
REACTOME_PI3K_AKT_SIGNALLING	CDKN1A PTEN PDPK1 FOXO1 PIK3R1 IRS1 AKT3		hsa-miR-203 (7.6e-38) hsa-miR-375 (1.8e-13) hsa-miR-181b (6.5e-09) hsa-miR-183 (8.2e-06) hsa-miR-17-5p (0.0051) hsa-miR-20a (0.0066) hsa-miR-106b (0.0067)
REACTOME_INTRINSIC_PATHWAY_FOR_APOPTOSIS	E2F1 CASP8 CYCS BCL2L11 APAF1 BAK1		hsa-miR-24 (1.1e-08)
REACTOME_PLC_BETA_MEDIATED_EVENTS	GNA14 GNA11 PLA2G4A PDE1C PRKAR1A ADCY2 ADCY8 ITPR1 ITPR2 ADCY9 CALM2 CALM1 PLCB4		hsa-miR-19b (1.1e-33) hsa-miR-92 (2e-27) hsa-miR-130b (3.1e-23) hsa-miR-130a (3.1e-21) hsa-miR-367 (5.7e-21) hsa-miR-203 (6e-18) hsa-miR-301 (3e-14) hsa-miR-181b (1.2e-10) hsa-miR-19a (8.1e-10) hsa-miR-214 (5.9e-09) hsa-miR-206 (1.8e-07) hsa-miR-9 (4.9e-07) hsa-miR-96 (7.3e-07) hsa-miR-183 (2.5e-06) hsa-miR-16 (2.1e-05) hsa-miR-103 (0.00015) hsa-miR-32 (0.0004) hsa-miR-23b (0.0012) hsa-miR-770-5p…
REACTOME_MITOTIC_PROMETAPHASE	PPP2R5B INCENP STAG1 RCC2 ZWINT NDC80 NUP107 KNTC1 ERCC6L KIF2C MAPRE1 AURKB DSN1 BIRC5 RAD21 SPC25 ZW10 MLF1IP CDCA8 CCDC99 NUF2 BUB1 BUB3 XPO1 PLK1 NUP85 MAD2L1 CDC20 PMF1 SGOL2 SGOL1 CKAP5 CASC5 BUB1B CENPA CENPO CENPN CENPL CENPP KIF18A CENPF CENPE CENPK CENPI CENPH	*	hsa-miR-21 (4.8e-72) hsa-miR-519a (5.3e-69) hsa-miR-216 (2.8e-46) hsa-miR-190 (5.8e-18) hsa-miR-10b (1.5e-17) hsa-miR-10a (1.1e-16) hsa-miR-122a (2.7e-10) hsa-miR-320 (3e-09) hsa-miR-128a (5.1e-05) hsa-miR-569 (0.0022) hsa-miR-195 (0.0053) hsa-miR-20b (0.0099)
REACTOME_ADENYLATE_CYCLASE_ACTIVATING_PATHWAY	ADCY2 ADCY8 ADCY9		hsa-miR-130b (2.8e-18) hsa-miR-19b (3.9e-10) hsa-miR-301 (1e-08) hsa-miR-181b (2.4e-06) hsa-miR-182 (3.4e-05) hsa-miR-130a (0.00011) hsa-miR-128b (0.0007)
REACTOME_TCR_SIGNALING	HLA-DRA HLA-DOA ENAH BCL10 TRA@ HLA-DMB HLA-DMA CD3G CD3D PTEN PDPK1 FYB CHUK UBE2N PRKCQ PIK3R1 HLA-DPA1 HLA-DPB1 LCP2 NFKB1 PAG1 ITK CD247 PTPRC		hsa-miR-214 (1.1e-07) hsa-miR-106b (0.00021) hsa-miR-375 (0.0032) hsa-miR-16 (0.0056)
REACTOME_SEMA4D_IN_SEMAPHORIN_SIGNALING	MYH9 RAC2 RAC1 ARHGEF12 MET ROCK1 ROCK2 RRAS MYH11 RHOA MYL9 PTPRC		hsa-miR-101 (8e-18) hsa-miR-301 (1e-08) hsa-miR-96 (2.1e-08) hsa-miR-130a (3.9e-07) hsa-miR-130b (1.8e-06) hsa-miR-23b (1e-05) hsa-miR-142-5p (1.1e-05) hsa-miR-182 (9.2e-05) hsa-miR-25 (0.00012) hsa-miR-485-3p (0.00046) hsa-miR-542-3p (0.00058) hsa-miR-19b (0.00083) hsa-miR-30c (0.0043) hsa-miR-144 (0.0055) hsa-miR-218 (0.0058) hsa-miR-124a (0.0083)
REACTOME_REGULATION_OF_INSULIN_SECRETION_BY_GLUCAGON_LIKE_PEPTIDE_1	CACNB2 VAMP2 STXBP1 PRKACB GNG2 GNG7 GNAI1 GNB5 GNG11 IQGAP1 KCNB1 PRKAR1A CACNA1D ADCY8 RAPGEF4 ITPR1 ITPR2		hsa-miR-203 (2e-20) hsa-miR-19b (6.8e-14) hsa-miR-19a (3.4e-13) hsa-miR-301 (4.7e-10) hsa-miR-101 (2.1e-08) hsa-miR-218 (1.1e-07) hsa-miR-181b (1.5e-07) hsa-miR-130b (2.3e-07) hsa-miR-92 (1.1e-06) hsa-miR-302a (3.1e-05) hsa-miR-130a (0.0003) hsa-miR-206 (0.0014) hsa-miR-18b (0.0024) hsa-miR-96 (0.0026) hsa-miR-372 (0.0057)
REACTOME_RNA_POLYMERASE_I_III_AND_MITOCHONDRIAL_TRANSCRIPTION	LZTS1 TAF1A BRF1 HIST1H4K HIST1H4A HIST1H4B HIST1H4F HIST1H4I HIST1H4J HIST1H4H HIST1H3J EHMT2 HIST1H3A HIST1H3B HIST1H3E HIST1H3F HIST1H3H GTF3C2 GTF3C4 GTF3C3 H2BFS HIST3H2BB ERCC6 POU2F1 HIST2H2AA3 HIST1H2BO HIST1H2BM HIST1H2BN HIST1H2BK HIST1H2BL HIST1H2BI HIST1H2BJ RRN3 HIST2H2AC GTF2H4 HIST2H2BE HIST1H2AB HIST1H2AC HIST1H2AD HIST1H2AE HIST1H2BB HIST1H2BD HIST1H2BE HIST1H2BF HIST1H2BG HIST1H…	*	hsa-miR-132 (8.3e-108) hsa-miR-212 (2.8e-58) hsa-miR-802 (4.2e-50) hsa-miR-584 (1.2e-26) hsa-let-7i (4.2e-18) hsa-miR-24 (1e-16) hsa-miR-515-5p (2.6e-10) hsa-miR-200a (9e-09) hsa-let-7e (3.3e-07) hsa-miR-504 (3.7e-07) hsa-miR-659 (5.3e-06) hsa-miR-580 (2.7e-05) hsa-miR-98 (5.9e-05) hsa-let-7b (8.4e-05) hsa-miR-544 (0.00013) hsa-let-7c (0.0003) hsa-let-7a (0.00058) hsa-miR-328 (0.0021) hsa-let-7d …
REACTOME_CELL_CYCLE_MITOTIC	PPP2R5B INCENP STAG1 LIG1 RCC2 ZWINT AHCTF1 NDC80 NUP107 FEN1 CSNK1D DBF4 KNTC1 ERCC6L KIF23 E2F1 E2F2 E2F3 KIF2C MAPRE1 AURKA AURKB ANAPC1 TUBA4A NEK2 FBXO5 DHFR DSN1 BIRC5 YWHAG KIF20A CEP72 CEP78 PKMYT1 RAD21 SPC25 ZW10 UBE2C CKS1B TYMS MLF1IP CDCA8 CCNA2 SKP2 ORC1L CCDC99 PCNT NUF2 PCNA CCNE2 OFD1 CCNE1 CDC7 CDC6 RRM2 POLA2 BUB1 BUB3 CCNB1 CCNB2 XPO1 AZI1 TUBB POLE2 ORC6L GINS1 GINS2 GINS4 PL…	*	hsa-miR-212 (1.5e-120) hsa-miR-21 (9.8e-57) hsa-miR-802 (3.6e-48) hsa-miR-132 (9.1e-30) hsa-miR-134 (1.3e-29) hsa-miR-154 (1.2e-25) hsa-miR-610 (4.2e-23) hsa-miR-503 (2.4e-17) hsa-miR-10a (8.9e-15) hsa-miR-507 (2.6e-13) hsa-miR-495 (2.8e-12) hsa-miR-643 (1.4e-11) hsa-let-7b (3.2e-10) hsa-miR-515-5p (3.4e-10) hsa-miR-10b (7.5e-10) hsa-miR-338 (1.7e-08) hsa-miR-190 (6.7e-08) hsa-miR-148b (1.4e-07) …
REACTOME_PHOSPHOLIPASE_CMEDIATED_CASCADE	FGF7 FGF2 KL		hsa-miR-199a (2.4e-06) hsa-miR-199b (0.0087)
REACTOME_MEMBRANE_TRAFFICKING	SH3GL2 SNX9 SNX2 AP1S2 COPB1 AP1G1 SEC24B HSPA8 TBC1D8B AP3B1 CPD SH3D19		hsa-miR-203 (2.6e-08) hsa-miR-142-5p (2.4e-06) hsa-miR-19a (6.1e-06) hsa-miR-200c (0.00032) hsa-miR-19b (0.00034) hsa-miR-130a (0.00048) hsa-miR-301 (0.00051) hsa-miR-101 (0.0031) hsa-miR-145 (0.004) hsa-miR-130b (0.006) hsa-miR-106a (0.0072)
REACTOME_CYTOCHROME_P450_ARRANGED_BY_SUBSTRATE_TYPE	CYP1B1 CYP7B1 CYP2U1 CYP3A4 CYP3A5 CYP3A7 CYP39A1 CYP27A1 PTGIS TBXAS1		hsa-miR-27b (0.0054)
REACTOME_TRANSPORT_OF_RIBONUCLEOPROTEINS_INTO_THE_HOST_NUCLEUS	RAE1 NUP107 SEH1L TPR NUP160 NUP155 AAAS NUP205 NUP214 NUP210 NUP85 NUP98 NUP93 NUP35 NUP43 NUP62 NUPL2 KPNB1 POM121		hsa-miR-132 (2e-41) hsa-miR-212 (2.6e-34) hsa-miR-216 (1.5e-13) hsa-miR-21 (5e-10) hsa-let-7c (5.3e-09) hsa-let-7b (2.5e-05) hsa-let-7i (2.7e-05) hsa-miR-342 (0.00017) hsa-let-7g (0.00032) hsa-let-7a (0.0016)
REACTOME_METABOLISM_OF_PROTEINS	GAS6 RPS27A FBXW9 FBXW7 RPL10A TBCA RPL13A EIF1AX FBXL5 FBXL3 EEF1B2 EIF3D EIF3E EIF3F EEF1A1 EIF4B EIF4E PROS1 TUBA3D TCP1 GSPT2 RPL18 RPL19 RPL13 RPL15 TUBB2C RPL10 RPL12 EIF2S3 RPS15 RPS13 RPS25 RPS23 RPS5 PFDN5 RPL36 RPL34 RPL26 RPL23 RPL21 EIF5 EEF2 RPL3 RPL5 RPL7A RPL23A RPS3A RPS4X EIF2B2 F10 PIGK PIGM PIGF PIGH PIGB PIGV PIGS PIGP		hsa-miR-203 (1.1e-14) hsa-miR-101 (4.1e-05) hsa-miR-1 (0.00013) hsa-miR-137 (0.0007) hsa-miR-142-5p (0.0012) hsa-miR-17-5p (0.0017) hsa-miR-20b (0.0025)
REACTOME_NEURORANSMITTER_RECEPTOR_BINDING_AND_DOWNSTREAM_TRANSMISSION_IN_THE_POSTSYNAPTIC_CELL	PDPK1 AP2B1 GRIA3 AP2A2 GRIA2 PRKACB CAMK2D NEFL GNG2 GNG7 GNB5 GNG11 RPS6KA6 RPS6KA2 NCALD RASGRF1 ADCY8 CALM2 CALM1 NSF		hsa-miR-130a (2e-09) hsa-miR-19a (1.1e-08) hsa-miR-181b (1.2e-08) hsa-miR-32 (1.3e-08) hsa-miR-130b (3.3e-08) hsa-miR-200c (3.8e-06) hsa-miR-96 (5.6e-06) hsa-miR-203 (9.7e-06) hsa-miR-18b (4.9e-05) hsa-miR-301 (5.4e-05) hsa-miR-18a (5.9e-05) hsa-miR-106a (0.0004) hsa-miR-302a (0.0021) hsa-miR-25 (0.006)
REACTOME_IMMUNOREGULATORY_INTERACTIONS_BETWEEN_A_LYMPHOID_AND_A_NON_LYMPHOID_CELL	KLRD1 KLRC1 C3 TRA@ RAET1E CD3G CD3D CD34 ICAM2 CD160 AMICA1 ITGAL CD96 CD81 CD226 CD200 KIR3DL2 ULBP3 CDH1 LILRA1 LILRB5 CD247		hsa-miR-214 (4.1e-06) hsa-miR-128b (8.7e-05)
REACTOME_RNA_POLYMERASE_III_TRANSCRIPTION_TERMINATION	LZTS1 POLR2H POLR2K POLR3A POLR3E		hsa-miR-504 (0.0051)
REACTOME_GAP_JUNCTION_DEGRADATION	GJA1 DNM1 DAB2 MYO6		hsa-miR-130a (0.0004) hsa-miR-23b (0.0029) hsa-miR-101 (0.0033)
REACTOME_TRANSLATION	EIF4A2 RPS27A RPL10A RPL13A EIF1AX EEF1B2 EIF3D EIF3E EIF3F EEF1A1 EIF4B EIF4E GSPT2 RPL18 RPL19 RPL13 RPL15 RPL10 RPL11 RPL12 EIF2S3 RPS15 RPS13 RPS25 RPS23 RPS6 RPS5 RPL36 RPL34 RPL26 RPL27 RPL23 RPL21 EIF5 EEF2 RPL3 RPL5 RPL7A RPL23A RPS3A RPS4X EIF2B2		hsa-miR-101 (1.2e-17) hsa-miR-19b (8.2e-16) hsa-miR-19a (4.2e-15) hsa-miR-145 (1.9e-12) hsa-miR-182 (3.9e-12) hsa-miR-203 (1e-09) hsa-miR-16 (1.1e-06) hsa-miR-142-5p (3.2e-05) hsa-miR-137 (0.002) hsa-miR-1 (0.0027) hsa-miR-15a (0.0051) hsa-miR-183 (0.0051)
REACTOME_TOLL_LIKE_RECEPTOR_3_CASCADE	MEF2C PPP2R1A MAP2K7 MAP2K4 PPP2CB RPS6KA5 RPS6KA2 NFKB1 MAPK11 MAPK10 TLR3		hsa-miR-23b (1.2e-17) hsa-miR-19a (1e-10) hsa-miR-130a (9.1e-10) hsa-miR-19b (6.4e-06) hsa-miR-130b (8.3e-06) hsa-miR-182 (2.7e-05) hsa-miR-302a (0.0003) hsa-miR-372 (0.00033) hsa-miR-92 (0.0017) hsa-miR-106b (0.0019) hsa-miR-27b (0.0035) hsa-miR-142-5p (0.0037) hsa-miR-203 (0.004)
REACTOME_GS_ALPHA_MEDIATED_EVENTS_IN_GLUCAGON_SIGNALLING	GNG2 GNG7 GNG11 ADCY2 ADCY8 ADCY9		hsa-miR-301 (6.7e-32) hsa-miR-181b (2e-25) hsa-miR-130b (2.9e-19) hsa-miR-130a (4e-07) hsa-miR-19b (0.00016) hsa-miR-182 (0.00018) hsa-miR-19a (0.00067) hsa-miR-128a (0.0054)
REACTOME_M_G1_TRANSITION	E2F1 E2F2 E2F3 ORC1L CDC6 ORC6L ORC2L CDT1 PSMD14 PSMD12 PSMA6 PSMA5 PSMA4 PSMA7 PSMB5 PSMB4 PSMB2 PSMC2 MCM8 MCM7 PSMD2 PSMD4 MCM2 MCM3 MCM4 MCM5 MCM6 PSME2	*	hsa-miR-802 (2.2e-191) hsa-miR-212 (6.6e-93) hsa-miR-132 (8.7e-60) hsa-miR-643 (1.1e-48) hsa-miR-507 (1.2e-39) hsa-miR-205 (5.2e-36) hsa-miR-10a (1.7e-26) hsa-miR-34c (3.5e-21) hsa-miR-34a (1.6e-20) hsa-miR-519a (2.4e-19) hsa-miR-10b (3.4e-19) hsa-miR-765 (1.6e-13) hsa-miR-200a (8.3e-12) hsa-miR-148b (6.9e-10) hsa-miR-21 (1e-06) hsa-miR-210 (0.00051) hsa-miR-124 (0.00064) hsa-miR-342 (0.0014) hsa…
REACTOME_VPR_MEDIATED_NUCLEAR_IMPORT_OF_PICS	RAE1 NUP107 SEH1L TPR NUP160 NUP155 AAAS NUP205 NUP214 NUP210 PSIP1 NUP85 HMGA1 NUP98 NUP93 NUP35 NUP43 NUP62 NUPL2 POM121		hsa-miR-212 (4.3e-91) hsa-miR-132 (2.8e-56) hsa-miR-216 (1.3e-18) hsa-let-7g (6.1e-15) hsa-miR-93 (6.9e-13) hsa-let-7b (7e-13) hsa-miR-21 (2.7e-11) hsa-miR-342 (3e-07) hsa-miR-217 (4e-07) hsa-let-7e (5.1e-06) hsa-miR-514 (6.1e-05) hsa-let-7f (0.00017) hsa-let-7a (0.00069) hsa-miR-371 (0.003) hsa-let-7c (0.0047) hsa-miR-26a (0.0061)
REACTOME_PROTEOLYTIC_CLEAVAGE_OF_SNARE_COMPLEX_PROTEINS	STX16 STX10 STX1A STX6 STX3		hsa-let-7b (7.8e-05) hsa-miR-132 (0.0022)
REACTOME_PACKAGING_OF_TELOMERE_ENDS	HIST1H4K HIST1H4A HIST1H4F HIST1H4I HIST1H4J HIST1H4H H2BFS HIST3H2BB HIST2H2AA3 HIST1H2BO HIST1H2BM HIST1H2BN HIST1H2BK HIST1H2BL HIST1H2BI HIST1H2BJ HIST2H2AC HIST2H2BE HIST1H2AB HIST1H2AC HIST1H2AD HIST1H2AE HIST1H2BB HIST1H2BD HIST1H2BE HIST1H2BF HIST1H2BG HIST1H2BH HIST1H2AK H2AFZ H2AFX HIST4H4	*	hsa-miR-802 (1.8e-193) hsa-miR-212 (3.4e-78) hsa-miR-132 (6.5e-60) hsa-miR-328 (3.6e-15) hsa-miR-24 (1.1e-08) hsa-miR-584 (3.9e-08) hsa-miR-200a (0.00011) hsa-miR-544 (0.00024)
REACTOME_SHC_RELATED_EVENTS	HRAS INS NRAS KRAS YWHAB GRB2 SHC1 SOS1		hsa-miR-134 (5.4e-15) hsa-miR-217 (3.3e-09) hsa-let-7b (1.6e-06) hsa-let-7e (4.2e-05) hsa-miR-190 (0.0011)
REACTOME_CDC6_ASSOCIATION_WITH_THE_ORC:ORIGIN_COMPLEX	E2F1 E2F2 E2F3 ORC1L CDC6 ORC6L ORC2L MCM8	*	hsa-miR-34c (5.5e-33) hsa-miR-10b (7.3e-16) hsa-miR-200a (5.7e-13) hsa-miR-10a (3.9e-12) hsa-miR-34a (3e-11) hsa-miR-643 (6.8e-09) hsa-miR-124 (4e-08) hsa-miR-210 (2.3e-07) hsa-miR-200b (2.9e-07) hsa-miR-205 (1.3e-06) hsa-miR-342 (1.4e-06) hsa-miR-148b (2.4e-06) hsa-miR-152 (3.4e-05) hsa-miR-30d (0.00033) hsa-miR-433 (0.00043) hsa-miR-21 (0.0037) hsa-miR-15b (0.0058) hsa-miR-30b (0.0098) hsa-miR-…
REACTOME_IRS_RELATED_EVENTS	CAB39 FGF7 FGF2 KL PDPK1 EIF4B PIK3R1 INSR IRS1 CAB39L		hsa-miR-203 (1.1e-05) hsa-miR-19b (0.00054) hsa-miR-199b (0.0009) hsa-miR-155 (0.0057) hsa-miR-19a (0.0066) hsa-miR-145 (0.0087)
REACTOME_GLUCAGON_SIGNALING_IN_METABOLIC_REGULATION	GNG2 GNG7 GNG11 PRKAR1A ADCY2 ADCY8 ADCY9		hsa-miR-301 (1.4e-23) hsa-miR-181b (5.3e-22) hsa-miR-130b (1.4e-15) hsa-miR-130a (9.2e-09) hsa-miR-182 (1.8e-08) hsa-miR-19a (1e-06) hsa-miR-96 (5.1e-05) hsa-miR-19b (0.0043) hsa-miR-200c (0.0056)
REACTOME_HORMONE_BIOSYNTHESIS	DPEP2 CUBN PTGES3 PTGIS LTA4H PTGS2 LTC4S POMC TBXAS1 STARD5 DIO2 DIO3 DIO1		hsa-miR-142-5p (1.1e-12) hsa-miR-101 (1.2e-06)
REACTOME_RNA_POLYMERASE_III_TRANSCRIPTION	LZTS1 BRF1 GTF3C2 GTF3C4 GTF3C3 POU2F1 POLR2H POLR2F POLR2K POLR3A POLR3E		hsa-miR-504 (2.4e-07) hsa-miR-515-5p (0.0011)
REACTOME_DNA_REPLICATION_PRE_INITIATION	DBF4 E2F1 E2F2 E2F3 ORC1L CDC7 CDC6 POLA2 POLE2 ORC6L CDK2 ORC2L PRIM1 PRIM2 POLE CDT1 PSMD14 PSMD12 MCM10 PSMA6 PSMA5 PSMA4 PSMA7 PSMB5 PSMB4 PSMB2 PSMC2 MCM8 MCM7 PSMD2 PSMD4 MCM2 MCM3 MCM4 MCM5 MCM6 PSME2	*	hsa-miR-802 (1.6e-101) hsa-miR-132 (7.8e-66) hsa-miR-507 (3.3e-54) hsa-miR-10b (1.1e-45) hsa-miR-200a (3.6e-30) hsa-miR-643 (2.3e-25) hsa-miR-765 (2.4e-21) hsa-miR-124 (2.9e-20) hsa-miR-34a (2.4e-19) hsa-miR-212 (9.7e-19) hsa-miR-21 (1.1e-16) hsa-miR-519a (6.9e-16) hsa-miR-10a (1.6e-14) hsa-miR-34c (1.8e-11) hsa-miR-148b (1.3e-10) hsa-miR-205 (2.2e-09) hsa-miR-210 (1.7e-08) hsa-miR-342 (1.6e-05) …
REACTOME_PKA_ACTIVATION	PRKACB PRKAR1A ADCY4 ADCY2 ADCY8 ADCY9		hsa-miR-130a (4.4e-30) hsa-miR-130b (1.2e-21) hsa-miR-301 (1.4e-14) hsa-miR-181b (8.3e-09) hsa-miR-19b (2.4e-08) hsa-miR-182 (2.8e-07) hsa-miR-19a (1.5e-06) hsa-miR-200c (0.0001) hsa-miR-96 (0.00087) hsa-miR-18a (0.0052)
REACTOME_DOWNSTREAM_SIGNALING_OF_ACTIVATED_FGFR	FGF7 FGF2 KL PIK3R1 INSR IRS1		hsa-miR-27b (1.3e-09) hsa-miR-199b (1.6e-05) hsa-miR-145 (0.0002) hsa-miR-183 (0.00065) hsa-miR-199a (0.006)
REACTOME_BASE_EXCISION_REPAIR	LIG1 FEN1 MBD4 POLD1 TDG SMUG1 POLB MUTYH APEX1	*	hsa-miR-610 (7.9e-18) hsa-let-7i (1.4e-09) hsa-let-7b (3.5e-06) hsa-miR-30d (5.3e-05) hsa-let-7f (0.00034) hsa-miR-320 (0.005)
REACTOME_NRAGE_SIGNALS_DEATH_THROUGH_JNK	ARHGEF16 ARHGEF11 FGD1 FGD3 OBSCN NGEF BCL2L11 ARHGEF2 ARHGEF7 ARHGEF9 PLEKHG2 SOS1 VAV3 VAV2 VAV1 TRIO ARHGAP4 ECT2		hsa-miR-132 (0.0017)
REACTOME_RNA_POLYMERASE_I_PROMOTER_CLEARANCE	TAF1A HIST1H4K HIST1H4A HIST1H4B HIST1H4F HIST1H4I HIST1H4J HIST1H4H HIST1H3J EHMT2 HIST1H3A HIST1H3B HIST1H3E HIST1H3F HIST1H3H H2BFS HIST3H2BB ERCC6 HIST2H2AA3 HIST1H2BO HIST1H2BM HIST1H2BN HIST1H2BK HIST1H2BL HIST1H2BI HIST1H2BJ RRN3 HIST2H2AC GTF2H4 HIST2H2BE HIST1H2AB HIST1H2AC HIST1H2AD HIST1H2AE HIST1H2BB HIST1H2BD HIST1H2BE HIST1H2BF HIST1H2BG HIST1H2BH HIST1H2AK H2AFZ H2AFX POLR1B POLR2H…	*	hsa-miR-802 (3.6e-148) hsa-miR-212 (4.2e-129) hsa-miR-132 (9.4e-75) hsa-let-7a (2.6e-17) hsa-let-7d (1.6e-14) hsa-let-7b (3e-11) hsa-let-7i (5.9e-11) hsa-miR-200a (4.2e-10) hsa-miR-24 (2.7e-09) hsa-miR-544 (1.5e-08) hsa-miR-328 (2.6e-08) hsa-let-7g (4.1e-08) hsa-miR-584 (4.8e-07) hsa-let-7f (5.1e-06) hsa-let-7c (0.00023) hsa-let-7e (0.002)
REACTOME_REMOVAL_OF_DNA_PATCH_CONTAINING_ABASIC_RESIDUE	FEN1 MBD4 POLD1 TDG SMUG1 POLB MUTYH APEX1		hsa-miR-30b (7.4e-16) hsa-miR-610 (1.6e-13) hsa-let-7b (1.2e-05) hsa-let-7f (0.0015) hsa-miR-320 (0.0087)
REACTOME_TRANSLATION_INITIATION_COMPLEX_FORMATION	EIF4A2 RPS27A EIF1AX EIF3D EIF3E EIF3F EIF4B EIF4E EIF4H EIF2S3 RPS14 RPS15 RPS13 RPS25 RPS27 RPS23 RPS24 RPS9 RPS6 RPS5 RPS8 RPS3A RPS4X RPS15A		hsa-miR-19b (1.7e-08) hsa-miR-19a (4.6e-08) hsa-miR-203 (1.3e-07) hsa-miR-16 (6.9e-06) hsa-miR-20b (0.00071) hsa-miR-145 (0.00084) hsa-miR-181b (0.0039) hsa-miR-20a (0.0092)
REACTOME_STRIATED_MUSCLE_CONTRACTION	DMD DES VIM TNNT3		hsa-miR-101 (1.8e-05) hsa-miR-200c (0.00073) hsa-miR-369-3p (0.0097)
REACTOME_BOTULINUM_NEUROTOXICITY	STX16 STX10 STX1A STX6 STX3		hsa-let-7e (0.0036)
REACTOME_SIGNALING_BY_PDGF	HRAS PIK3CA NRAS COL9A1 COL9A2 COL9A3 COL5A2 COL5A1 KRAS YWHAB SOS1 COL1A1 COL4A2 COL4A1 COL2A1 THBS3 STAT1 PLCG1		hsa-let-7i (0.00097)
REACTOME_CELL_SURFACE_INTERACTIONS_AT_THE_VASCULAR_WALL	GAS6 LYN SLC7A11 CD2 SELPLG MAG CD48 AMICA1 FYN ITGAL CAV1 ITGA6 PROS1 PIK3R1 SELP SLC7A8 THBD TEK JAM2 JAM3		hsa-miR-214 (1.4e-05) hsa-miR-199a (0.0039) hsa-miR-19a (0.0046) hsa-miR-106b (0.005) hsa-miR-375 (0.0085)
REACTOME_PLATELET_DEGRANULATION	APP F8 SERPING1 F5 SERPINF2 GAS6 IGF1 TGFB3 TGFB1 FIGF VEGFC CD36 PPBP PDGFA F13A1 TTN MMRN1 ITGB3 PROS1 VWF A2M HGF FLNA SELP PLG ACTN1 TIMP1 FGG FGA FGB PF4 PSAP CFD THBS4 CALM2 CALM1 CLU SRGN HABP4		hsa-miR-130b (1.1e-11) hsa-miR-130a (3.3e-11) hsa-miR-19a (1.1e-10) hsa-miR-206 (2.6e-09) hsa-miR-19b (3.7e-08) hsa-miR-301 (2.7e-06) hsa-miR-181b (1.2e-05) hsa-miR-106a (9.2e-05) hsa-miR-153 (0.00015) hsa-miR-182 (0.00016) hsa-miR-106b (0.001) hsa-miR-587 (0.0017) hsa-miR-101 (0.0017) hsa-miR-15a (0.0031) hsa-miR-218 (0.0054)
REACTOME_GTP_HYDROLYSIS_AND_JOINING_OF_THE_60S_RIBOSOMAL_SUBUNIT	RPLP0 EIF4A2 RPS27A RPL10A RPL13A EIF1AX EIF3D EIF3E EIF3F EIF4B EIF4E EIF4H RPL18 RPL19 RPL14 RPL13 RPL15 RPL10 RPL11 RPL12 EIF2S3 RPS14 RPS15 RPS13 RPS25 RPS27 RPS23 RPS24 RPS9 RPS6 RPS5 RPS8 RPL41 RPL3L RPL36 RPL34 RPL26 RPL27 RPL28 RPL23 RPL21 EIF5 RPL6 RPL9 RPL3 RPL5 RPL4 RPL7A RPL23A RPS3A RPS4X RPS15A		hsa-miR-203 (6.4e-16) hsa-miR-145 (8.6e-15) hsa-miR-16 (9.4e-13) hsa-miR-101 (2.9e-11) hsa-miR-19a (5.2e-07) hsa-miR-137 (3.8e-06) hsa-miR-19b (1.8e-05) hsa-miR-15a (2.2e-05) hsa-miR-181b (8.2e-05) hsa-miR-142-5p (0.00025) hsa-miR-182 (0.00044) hsa-miR-20a (0.00091) hsa-miR-31 (0.0036) hsa-miR-376a (0.0085)
REACTOME_FGFR_LIGAND_BINDING_AND_ACTIVATION	FGF7 FGF2 SDC2 KL		hsa-miR-200c (2.5e-08) hsa-miR-182 (0.00015)
REACTOME_SCF_BETA_TRCP_MEDIATED_DEGRADATION_OF_EMI1	FBXO5 CDC20 PSMD14 PSMD12 PSMA6 PSMA5 PSMA4 PSMA7 PSMB5 PSMB4 PSMB2 PSMC4 PSMC2 PSMD1 PSMD2 PSMD4 PSME2		hsa-miR-132 (1.8e-43) hsa-miR-507 (5.8e-33) hsa-miR-802 (1.3e-26) hsa-miR-212 (2.2e-17) hsa-miR-765 (1.6e-10) hsa-miR-555 (0.00051) hsa-miR-620 (0.00069)
REACTOME_GOLGI_ASSOCIATED_VESICLE_BIOGENESIS	SH3GL2 ARRB1 VAMP2 RAB5C PLDN SNX9 SNX2 YIPF6 AP3S1 AP1S2 AP1G1 PUM1 HSPA8 TBC1D8B AP1B1 AP3B1 CPD SH3D19		hsa-miR-19a (8.3e-50) hsa-miR-301 (9.6e-27) hsa-miR-203 (1.6e-09) hsa-miR-101 (2.7e-09) hsa-miR-181b (3.5e-06) hsa-miR-130a (1.9e-05) hsa-miR-142-5p (4.8e-05) hsa-miR-1 (0.00012) hsa-miR-92 (0.00035) hsa-miR-206 (0.00081) hsa-miR-218 (0.0015) hsa-miR-330 (0.0019) hsa-miR-200c (0.0025) hsa-miR-19b (0.0031) hsa-miR-130b (0.0032)
REACTOME_NOREPINEPHRINE_NEUROTRANSMITTER_RELEASE_CYCLE	STXBP1 MAOA		hsa-miR-16 (0.00023)
REACTOME_SIGNALLING_TO_RAS	HRAS NRAS RALA MAPKAPK3 MAPKAPK2 KRAS NTRK1 YWHAB GRB2 SHC1 SOS1 MAPK13 MAPK14		hsa-let-7e (0.0038) hsa-miR-217 (0.0058) hsa-miR-134 (0.0093)
REACTOME_UNFOLDED_PROTEIN_RESPONSE	DNAJC3 DNAJB9 SERP1 XBP1 HERPUD1 MBTPS1		hsa-miR-218 (8.6e-06) hsa-miR-142-5p (1.3e-05) hsa-miR-183 (0.00013)
REACTOME_CELLEXTRACELLULAR_MATRIX_INTERACTIONS	ILK PARVB PARVA LIMS1 LIMS2 ARHGEF6 FBLIM1 FLNC FLNA ACTN1 PXN RSU1		hsa-miR-19a (7e-12) hsa-miR-145 (2.1e-09) hsa-miR-19b (3.9e-08) hsa-miR-199b (7.5e-06) hsa-miR-542-3p (0.00031)
REACTOME_AUTODEGRADATION_OF_CDH1_BY_CDH1_APC	ANAPC1 UBE2C CDC23 PSMD14 PSMD12 PSMA6 PSMA5 PSMA4 ANAPC11 PSMA7 PSMB5 PSMB4 PSMB2 PSMC4 PSMC2 PSMD1 PSMD2 PSMD4 PSME2		hsa-miR-802 (1.8e-88) hsa-miR-132 (3e-50) hsa-miR-212 (1.1e-39) hsa-miR-507 (1.2e-11) hsa-miR-765 (1.2e-07) hsa-miR-495 (8.9e-06) hsa-miR-620 (2.5e-05) hsa-miR-766 (0.00013)
REACTOME_SYNTHESIS_OF_DNA	LIG1 FEN1 CCNA2 ORC1L PCNA CDC6 POLA2 POLE2 ORC6L GINS1 GINS2 GINS4 POLD1 CDK2 ORC2L PRIM1 PRIM2 POLE RFC5 RFC3 RFC4 RFC2 CDT1 PSMD14 PSMD12 PSMA6 PSMA5 PSMA4 PSMA7 PSMB5 PSMB4 PSMB2 PSMC2 MCM8 MCM7 PSMD2 PSMD4 MCM2 MCM3 MCM4 MCM5 MCM6 PSME2	*	hsa-miR-154 (0) hsa-miR-132 (1e-218) hsa-miR-802 (1.1e-208) hsa-miR-765 (4.8e-97) hsa-miR-134 (5e-96) hsa-miR-515-5p (3.3e-50) hsa-miR-212 (5.7e-46) hsa-miR-610 (7.7e-30) hsa-miR-507 (9.1e-28) hsa-miR-519a (1.6e-20) hsa-miR-381 (2.5e-16) hsa-miR-217 (2.1e-13) hsa-miR-30c (1.2e-10) hsa-miR-643 (6.8e-06) hsa-miR-30b (0.00014)
REACTOME_SIGNALING_BY_EGFR	HRAS PIK3CA AP2S1 NRAS AP2M1 CBL KRAS YWHAB GRB2 SHC1 HGS ARHGEF7 SOS1 CDC42 ADAM10 SH3KBP1 ADAM17 ADAM12 PLCG1 EPS15L1 CSK		hsa-let-7b (3.4e-05) hsa-miR-134 (0.0052)
REACTOME_PHASE_1_FUNCTIONALIZATION_OF_COMPOUNDS	CYP1B1 CYP7B1 FMO2 FMO3 CYP2U1 ADH6 CYP3A4 CYP3A5 CYP3A7 CYP39A1 CYP27A1 PTGIS PTGS2 MAOA MAOB ADH1C ADH1B ADH1A ALDH1A1 TBXAS1		hsa-miR-101 (4.7e-31) hsa-miR-27b (4.6e-20) hsa-miR-144 (2.1e-07) hsa-miR-27a (0.00016) hsa-miR-758 (0.00048)
REACTOME_NEF_MEDIATED_DOWNREGULATION_OF_MHC_CLASS_I_COMPLEX_CELL_SURFACE_EXPRESSION	AP1S2 AP1G1 AP1B1		hsa-miR-130b (7.6e-06) hsa-miR-130a (4.4e-05) hsa-miR-101 (0.0026) hsa-miR-203 (0.0042) hsa-miR-142-5p (0.0082)
REACTOME_DNA_STRAND_ELONGATION	LIG1 FEN1 PCNA POLA2 GINS1 GINS2 GINS4 POLD1 PRIM1 PRIM2 RFC5 RFC3 RFC4 RFC2 MCM8 MCM7 MCM2 MCM3 MCM4 MCM5 MCM6	*	hsa-miR-154 (8.5e-301) hsa-miR-610 (2.2e-128) hsa-miR-515-5p (6.4e-105) hsa-miR-134 (3.5e-72) hsa-miR-217 (2.8e-41) hsa-miR-519a (1.5e-05)
REACTOME_RNA_POLYMERASE_I_TRANSCRIPTION_INITIATION	TAF1A EHMT2 ERCC6 RRN3 GTF2H4 POLR1B POLR2H POLR2K		hsa-let-7i (0.0022)
REACTOME_TRIACYLGLYCERIDE_BIOSYNTHESIS	GK AGPAT4 PPAP2C PPAP2A PPAP2B		hsa-miR-218 (1.4e-05) hsa-miR-203 (0.00011)
REACTOME_PLATELET_ACTIVATION	APP PIK3CG F8 SERPING1 F5 SERPINF2 GAS6 LYN IGF1 GNA14 GNA11 GNA12 TGFB3 P2RY1 STXBP3 FIGF VEGFC CD36 PPBP PLA2G4A PDPK1 FYN PDGFA F13A1 TTN MMRN1 PROS1 PIK3R1 A2M GNG2 GNG7 GNAI1 HGF GNB5 GNG11 GNG12 DGKB DGKG SELP PLG P2RY12 FGA FGB LCP2 PF4 PSAP CFD ITPR1 ITPR2 CALM2 CALM1 CLU SRGN MGLL AKT3		hsa-miR-203 (1.3e-22) hsa-miR-181b (6.2e-17) hsa-miR-130a (1.8e-15) hsa-miR-19a (6.1e-13) hsa-miR-96 (1.9e-10) hsa-miR-101 (2.1e-08) hsa-miR-19b (1e-07) hsa-miR-485-3p (1.1e-07) hsa-miR-142-5p (1.2e-07) hsa-miR-302a (2.9e-07) hsa-miR-32 (8.9e-07) hsa-miR-92 (1.3e-06) hsa-miR-372 (1.7e-06) hsa-miR-367 (2.2e-06) hsa-miR-301 (1.7e-05) hsa-miR-206 (2.3e-05) hsa-miR-302b (3.2e-05) hsa-miR-130b (0.0002…
REACTOME_CELL_JUNCTION_ORGANIZATION	ILK PARVA CDH12 CDH13 CLDN5 CLDN1 CADM2 LIMS2 MLLT4 DST ITGA6 ARHGEF6 FLNC CDH1 CDH5 CLDN10 CLDN12 CTNND1		hsa-miR-19a (3.5e-07) hsa-miR-218 (5.5e-06) hsa-miR-137 (2.2e-05) hsa-miR-19b (0.00013) hsa-miR-182 (0.0012) hsa-miR-23b (0.0076)
REACTOME_SHC_MEDIATED_SIGNALLING	HRAS NRAS KRAS YWHAB GRB2 SHC1 SOS1		hsa-miR-134 (2.6e-18) hsa-miR-217 (1.1e-11) hsa-let-7e (6.7e-06) hsa-let-7c (1.5e-05) hsa-miR-30b (3.7e-05) hsa-miR-190 (0.00033) hsa-let-7i (0.0042) hsa-let-7f (0.0085)
REACTOME_HIV_INFECTION	RAE1 LIG1 TAF11 TAF13 NUP107 FEN1 NCBP2 NCBP1 SUPT16H SEH1L TH1L PPIA RANBP1 NUP155 AAAS AP1S1 GTF2H4 NUP205 NUP214 NUP210 TCEB3 TCEB1 XPO1 GTF2E1 TAF4 TAF5 WHSC2 ATP6V1H NUP85 HMGA1 SUPT5H NUP43 ELL NUP62 CCNT1 SLC25A5 POLR2H POLR2G POLR2F POLR2K POLR2J POLR2D PSMD14 PSMD12 PSMA6 PSMA5 PSMA4 PSMA7 PSMB5 PSMB4 PSMB2 PSMC4 PSMC2 PSMD1 PSMD2 PSMD4 PSME2		hsa-miR-212 (1.2e-46) hsa-miR-132 (4.1e-32) hsa-miR-802 (9.9e-14) hsa-miR-134 (1.9e-13) hsa-miR-320 (2.1e-08) hsa-miR-21 (4.9e-07) hsa-miR-610 (2.6e-05) hsa-miR-765 (0.00023) hsa-miR-495 (0.0017) hsa-miR-26a (0.0045) hsa-miR-34c (0.0047) hsa-miR-507 (0.0054) hsa-let-7a (0.0071) hsa-miR-190 (0.0084) hsa-let-7g (0.0096)
REACTOME_CELL_CYCLE_CHECKPOINTS	RAD1 ATM DBF4 ANAPC1 HUS1 CLSPN UBE2C ORC1L CCNE2 CCNE1 CDC7 CDC6 BUB3 CCNB1 CCNB2 ORC6L CDK2 ORC2L CDC25C CDC25A RFC5 RFC3 MAD2L1 RFC4 RFC2 CHEK1 CHEK2 CDC23 CDC20 PSMD14 PSMD12 MCM10 PSMA6 PSMA5 PSMA4 ANAPC11 PSMA7 PSMB5 PSMB4 PSMB2 PSMC2 MCM8 MCM7 PSMD2 PSMD4 MCM2 MCM3 MCM4 MCM5 MCM6 PSME2 BUB1B	*	hsa-miR-802 (6.3e-93) hsa-miR-132 (2e-82) hsa-miR-495 (4.2e-40) hsa-miR-134 (1.6e-39) hsa-miR-212 (8.6e-30) hsa-miR-507 (6.2e-27) hsa-let-7g (5.4e-23) hsa-miR-503 (5.7e-17) hsa-miR-643 (1.4e-16) hsa-miR-765 (7.2e-15) hsa-miR-138 (1.5e-14) hsa-miR-21 (1.5e-14) hsa-miR-519a (3.2e-12) hsa-miR-34a (7.4e-08) hsa-let-7b (1.8e-06) hsa-miR-452 (7.9e-06) hsa-let-7c (1.9e-05) hsa-miR-141 (5.5e-05) hsa-let-…
REACTOME_P38MAPK_EVENTS	HRAS NRAS RALA MAPKAPK3 MAPKAPK2 KRAS MAPK14		hsa-miR-134 (1.6e-18) hsa-let-7b (1.5e-08) hsa-miR-190 (1.6e-08) hsa-miR-216 (3.5e-06) hsa-let-7i (1e-05) hsa-miR-217 (3.4e-05) hsa-miR-98 (0.00051) hsa-let-7f (0.0025) hsa-miR-30b (0.0053)
REACTOME_ADHERENS_JUNCTIONS_INTERACTIONS	CDH12 CDH13 CADM2 MLLT4 CDH1 CDH5 CTNND1		hsa-miR-137 (0.0012)
REACTOME_SEMA3A_PLEXIN_REPULSION_SIGNALING_BY_INHIBITING_INTEGRIN_ADHESION	NRP1 FYN RRAS FES		hsa-miR-130b (7.8e-24) hsa-miR-130a (1.2e-17) hsa-miR-301 (3.3e-13) hsa-miR-142-5p (9.8e-07) hsa-miR-376b (5.2e-05) hsa-miR-376a (0.0001) hsa-miR-27b (0.00082) hsa-miR-214 (0.005) hsa-miR-369-3p (0.0093)
REACTOME_TRANSMISSION_ACROSS_CHEMICAL_SYNAPSES	UNC13B CACNB2 VAMP2 SLC1A1 STXBP1 PDPK1 AP2B1 GRIA3 AP2A2 GRIA2 PRKACB CAMK2D NEFL GNG2 GNG7 MAOA GNB5 GNG11 RPS6KA6 RPS6KA2 NCALD RASGRF1 ADCY8 CALM2 CALM1 NSF		hsa-miR-203 (1.2e-11) hsa-miR-19b (8.4e-11) hsa-miR-130a (1.7e-08) hsa-miR-301 (4.9e-06) hsa-miR-23b (7.7e-06) hsa-miR-96 (3.3e-05) hsa-miR-101 (8.8e-05) hsa-miR-18a (0.00014) hsa-miR-770-5p (0.00035) hsa-miR-32 (0.00036) hsa-miR-15a (0.00096) hsa-miR-9 (0.0082) hsa-miR-20a (0.0082) hsa-miR-375 (0.0084) hsa-miR-206 (0.0094)
REACTOME_DNA_REPAIR	LIG1 ATM FANCD2 FEN1 PALB2 ALKBH2 ZBTB32 FANCM FANCI FANCE FANCG FANCA FANCB FANCC RAD52 RAD51 BRCA2 UBE2T PRKDC ERCC6 PCNA GTF2H4 POLE2 POLD1 TDG SMUG1 H2AFX POLE POLB RFC5 RFC3 RFC4 RFC2 POLR2H POLR2G POLR2K POLR2J POLR2D MUTYH TDP1	*	hsa-let-7b (4e-42) hsa-miR-134 (4.7e-36) hsa-miR-154 (2.9e-19) hsa-miR-217 (7.8e-12) hsa-miR-30d (2e-10) hsa-miR-30b (8.1e-10) hsa-let-7i (4.4e-09) hsa-miR-610 (5.3e-09) hsa-let-7f (2.6e-07) hsa-miR-30c (3.1e-05) hsa-miR-503 (8.5e-05) hsa-miR-29a (0.00023) hsa-let-7a (0.00057)
REACTOME_BRANCHED_CHAIN_AMINO_ACID_CATABOLISM	AUH HIBADH ACAT1 BCKDHB ALDH6A1 ACADSB		hsa-miR-19a (3.2e-05) hsa-miR-323 (0.0011)
REACTOME_ADP_SIGNALLING_THROUGH_P2Y_PURINOCEPTOR_1	GNA14 GNA11 PLA2G4A GNG2 GNG7 GNB5 GNG11		hsa-miR-372 (2.4e-12) hsa-miR-17-5p (7.8e-07) hsa-miR-106a (2.2e-05) hsa-miR-302b (3.1e-05) hsa-miR-106b (8.2e-05) hsa-miR-20b (0.00025) hsa-miR-93 (0.0081)
REACTOME_METABLISM_OF_NUCLEOTIDES	DGUOK CAD IMPDH1 UPP1 ATIC PPAT TK1 AK2 DUT TYMS NME4 NME1 RRM2 XDH CTPS2 NT5M GMPS PAICS CTPS DTYMK GUK1 UMPS UCK2		hsa-let-7b (3.9e-15) hsa-let-7i (1.7e-07) hsa-miR-29c (0.00069)
REACTOME_LYSOSOME_VESICLE_BIOGENESIS	SH3GL2 VAMP2 AP1S2 AP1G1 HSPA8		hsa-miR-203 (3.1e-07) hsa-miR-130a (5.6e-05) hsa-miR-101 (7.1e-05) hsa-miR-130b (0.00042) hsa-miR-16 (0.0049)
REACTOME_JNK_PHOSPHORYLATION_AND_ACTIVATION_MEDIATED_BY_ACTIVATED_HUMAN_TAK1	MAP2K7 MAP2K4 MAPK10 TLR3		hsa-miR-25 (3.3e-06) hsa-miR-367 (0.001) hsa-miR-27b (0.0014)
REACTOME_FORMATION_OF_THE_TERNARY_COMPLEX_AND_SUBSEQUENTLY_THE_43S_COMPLEX	RPS27A EIF1AX EIF3D EIF3E EIF3F EIF2S3 RPS14 RPS15 RPS13 RPS25 RPS27 RPS23 RPS24 RPS9 RPS6 RPS5 RPS8 RPS3A RPS4X RPS15A		hsa-miR-142-5p (6.4e-07) hsa-miR-137 (0.00097)
REACTOME_MICRORNA_BIOGENESIS	RAN RNASEN XPO5 TARBP2 POLR2H POLR2G POLR2F POLR2K POLR2J POLR2D		hsa-let-7b (0.00013) hsa-let-7f (0.00025) hsa-let-7a (0.00026) hsa-miR-34a (0.0012) hsa-let-7e (0.0097)
REACTOME_METABOLISM_OF_MRNA	PABPC1 EIF4A1 EDC3 LSM5 LSM4 LSM3 LSM2 LSM1 EXOSC9 EXOSC4 EXOSC5 EXOSC3 EXOSC1 CNOT3 CNOT2 CNOT6 XRN1 DCPS PARN EIF4G1		hsa-miR-34c (0.0018) hsa-miR-10b (0.0019) hsa-miR-21 (0.0028)
REACTOME_CYCLIN_A1_ASSOCIATED_EVENTS_DURING_G2_M_TRANSITION	CCNA2 CCNB1 CCNB2 XPO1 PLK1 CDC25C CDC25A CDC25B	*	hsa-let-7i (8.4e-07) hsa-let-7b (1.1e-05) hsa-let-7e (1.6e-05) hsa-let-7f (4.4e-05) hsa-let-7g (6.7e-05) hsa-let-7c (0.00013) hsa-miR-30b (0.00041) hsa-miR-503 (0.0014) hsa-miR-320 (0.0017) hsa-let-7a (0.0026) hsa-miR-34a (0.0036) hsa-miR-98 (0.0053)
REACTOME_G2_M_CHECKPOINTS	RAD1 ATM DBF4 HUS1 CLSPN ORC1L CDC7 CDC6 CCNB1 CCNB2 ORC6L CDK2 ORC2L CDC25C CDC25A RFC5 RFC4 RFC2 CHEK1 CHEK2 MCM10 MCM8 MCM7 MCM2 MCM3 MCM4 MCM6	*	hsa-miR-134 (2.7e-83) hsa-miR-643 (1.4e-41) hsa-let-7b (3.3e-31) hsa-miR-503 (2.5e-30) hsa-let-7c (1.4e-29) hsa-miR-452 (2.8e-17) hsa-miR-34a (7.2e-15) hsa-let-7g (8.2e-15) hsa-miR-30b (6.9e-13) hsa-miR-519a (3.7e-11) hsa-let-7f (5.1e-11) hsa-let-7i (1.1e-10) hsa-let-7e (2.4e-10) hsa-miR-30c (1e-09) hsa-let-7a (2.2e-06) hsa-miR-21 (0.0014)
REACTOME_REGULATED_PROTEOLYSIS_OF_P75NTR	APH1B NFKB1		hsa-miR-323 (0.00046)
REACTOME_APOPTOSIS	HIST1H1E HIST1H1D HIST1H1B HIST1H1A DFFA DFFB PTK2 E2F1 CASP8 CYCS LMNB1 CLSPN BCAP31 DSP BMF BCL2L11 DIABLO TRAF2 APAF1 BAK1 PSMD14 PSMD12 PSMA6 PSMA5 PSMA4 PSMA7 PSMB5 PSMB4 PSMB2 PSMC2 PSMD2 PSMD4 PSME2		hsa-miR-802 (4.9e-38) hsa-miR-132 (7.7e-25) hsa-miR-212 (8.8e-10) hsa-miR-765 (2.7e-08) hsa-miR-507 (2.1e-06) hsa-miR-24 (2.1e-06) hsa-miR-30b (0.00013) hsa-miR-30c (0.00015) hsa-miR-148b (0.00039)
REACTOME_ENERGY_DEPENDENT_REGULATION_OF_MTOR_BY_LKB1_AMPK	CAB39 PRKAA2 TSC1 PPM1A CAB39L		hsa-miR-203 (2.1e-16)
REACTOME_DIABETES_PATHWAYS	PGAM2 PDHA1 KIF5B GNGT1 PDHX SDHC ATF4 CYC1 PAX6 UQCRQ CYCS UQCRH MDH2 IDH2 RPL18A ATP5E ATP5I ATP5H ATP5J STX1A COX5A COX5B MMP1 COX6C SEC61G COX7B COX8A PFKP PFKM GAPDH IGFBP2 RPS26 NDUFA13 RPL37 SSR2 SLC2A1 RPN1 RPN2 DDIT3 UBA52 RPL8 SEC61A2 ATP5J2 IDH3B CACNA2D2 NDUFV3 PRKAR1B NDUFS6 NDUFS5 NDUFS8 NDUFS3 NDUFS1 CHRM3 NFYA ADCY5 ADCY6 PFKFB4 TPI1 COX6B1 COX6A1 SLC25A5 PGK1 SLC30A6 PLCB3 NDUFC2…		hsa-miR-217 (3.7e-06) hsa-miR-132 (0.0002) hsa-miR-134 (0.00056) hsa-miR-212 (0.0017)
REACTOME_GENERATION_OF_SECOND_MESSENGER_MOLECULES	HLA-DQA2 HLA-DQA1 HLA-DRA HLA-DOA HLA-DQB1 ENAH TRA@ HLA-DMB HLA-DMA CD3G CD3D FYB HLA-DPA1 GRAP2 HLA-DRB5 HLA-DPB1 LCK LCP2 ITK CD247		hsa-miR-214 (2.9e-13) hsa-miR-15a (0.0092)
REACTOME_INFLUENZA_LIFE_CYCLE	RPLP0 DNAJC3 RPS27A RPL10A GRSF1 RPL13A CANX NUP133 CLTC RANBP2 RPL18 RPL19 RPL14 RPL13 RPL15 RPL10 RPL11 RPL12 RPS14 RPS15 RPS13 HSPA1A RPS25 RPS27 RPS23 RPS24 RPS9 RPS6 RPS5 RPS8 RPL41 RPL3L RPL36 RPL34 RPL26 RPL27 RPL28 RPL23 RPL21 RPL6 RPL9 RPL3 RPL5 RPL4 RPL7A RPL23A GTF2F1 GTF2F2 RPS3A RPS4X RPS15A NUP50 NUP54 POLR2E POLR2C POLR2B POLR2A HSP90AA1		hsa-miR-130b (1e-13) hsa-miR-130a (2.6e-13) hsa-miR-301 (2.4e-06) hsa-miR-142-5p (8.4e-06) hsa-miR-137 (1e-05) hsa-miR-1 (0.00091) hsa-miR-19b (0.0016) hsa-miR-19a (0.006)
REACTOME_ERK_MAPK_TARGETS	MEF2C MEF2A MAPK3 PPP2R1A PPP2CB RPS6KA5 RPS6KA3 RPS6KA2 MAPK11		hsa-miR-130b (3.2e-20) hsa-miR-203 (8.4e-15) hsa-miR-214 (7.4e-12) hsa-miR-130a (9.2e-09) hsa-miR-19b (1.7e-08) hsa-miR-19a (6.1e-06) hsa-miR-182 (2.9e-05) hsa-miR-27b (0.00059) hsa-miR-9 (0.0023) hsa-miR-372 (0.0025) hsa-miR-106b (0.01)
REACTOME_ACTIVATED_AMPK_STIMULATES_FATTY_ACID_OXIDATION_IN_MUSCLE	CAB39 PRKAA2 CAB39L		hsa-miR-203 (0.00037)
REACTOME_PP2A_MEDIATED_DEPHOSPHORYLATION_OF_KEY_METABOLIC_FACTORS	PPP2CB		hsa-miR-214 (0.0025)
REACTOME_CHEMOKINE_RECEPTORS_BIND_CHEMOKINES	CXCL12 CCL5 CCR6 PPBP CCR5 CCR2 CXCR6 CCL21 CCL19 XCL1 XCL2 CCRL1 PF4 CX3CR1		hsa-miR-23b (5.9e-05) hsa-miR-101 (0.0002)
REACTOME_FORMATION_OF_PLATELET_PLUG	APP PIK3CG F8 SERPING1 F5 SERPINF2 GAS6 LYN IGF1 GNA14 GNA11 GNA12 TGFB3 P2RY1 STXBP3 FIGF VEGFC CD36 PPBP PLA2G4A PDPK1 FYN PDGFA F13A1 TTN MMRN1 ITGA2 PROS1 PIK3R1 A2M GNG2 GNG7 GNAI1 HGF GNB5 GNG11 GNG12 APBB1IP DGKB DGKG SELP PLG P2RY12 FGA FGB LCP2 PF4 PSAP RAPGEF4 CFD ITPR1 ITPR2 CALM2 CALM1 CLU SRGN MGLL AKT3 RASGRP3 RASGRP2		hsa-miR-203 (2.6e-19) hsa-miR-130a (2.8e-17) hsa-miR-101 (1.8e-14) hsa-miR-181b (2.5e-13) hsa-miR-372 (9e-13) hsa-miR-302a (2.8e-11) hsa-miR-19b (1.1e-10) hsa-miR-301 (1.7e-09) hsa-miR-485-3p (1e-08) hsa-miR-19a (1.6e-08) hsa-miR-130b (1.7e-08) hsa-miR-96 (4.9e-08) hsa-miR-142-5p (3.1e-05) hsa-miR-106a (7.3e-05) hsa-miR-32 (0.00011) hsa-miR-424 (0.00032) hsa-miR-106b (0.0014) hsa-miR-218 (0.0014)…
REACTOME_ERKS_ARE_INACTIVATED	MAPK3 DUSP4 PPP2R1A PPP2CB		hsa-miR-214 (6.4e-06) hsa-miR-137 (0.0061)
REACTOME_CYTOSOLIC_TRNA_AMINOACYLATION	GARS WARS FARSB FARSA EEF1E1 CARS TARS YARS MARS VARS AARS EPRS LARS		hsa-miR-30b (6.4e-07) hsa-miR-24 (0.00026) hsa-miR-30c (0.0049)
REACTOME_PLATELET_ADHESION_TO_EXPOSED_COLLAGEN	LYN CD36 FYN ITGA2		hsa-miR-27a (4.5e-06)
REACTOME_REGULATION_OF_AMPK_ACTIVITY_VIA_LKB1	CAB39 PRKAA2 PPM1A CAB39L		hsa-miR-203 (1.8e-14) hsa-miR-214 (0.00023) hsa-miR-200c (0.00028) hsa-miR-19a (0.0026)
REACTOME_DOWNSTREAM_TCR_SIGNALING	HLA-DQA2 HLA-DRA HLA-DOA BCL10 TRA@ HLA-DMB HLA-DMA CD3G CD3D PTEN PDPK1 CHUK UBE2N PRKCQ PIK3R1 HLA-DPA1 HLA-DPB1 TRAF6 NFKB1 CD247		hsa-miR-214 (5.3e-11) hsa-miR-27a (4.4e-06) hsa-miR-375 (0.0029) hsa-miR-20b (0.0034) hsa-miR-106b (0.0039)
REACTOME_AXON_GUIDANCE	HRAS NRAS GSK3B SPTB PTK2 ABL2 CNTN2 COL9A1 COL9A2 COL9A3 COL5A2 COL5A1 SEMA7A KRAS ARTN YWHAB PLXNA1 ROBO2 SPTBN5 SPTBN2 SRGAP1 SOS1 COL1A1 GPC1 CDK5 VASP NCAN COL4A1 AGRN COL2A1 PAK1		hsa-let-7b (0.0026)
REACTOME_REGULATION_OF_APC_ACTIVATORS_BETWEEN_G1_S_AND_EARLY_ANAPHASE	ANAPC1 FBXO5 UBE2C CCNA2 BUB3 CCNB1 PLK1 CDK2 MAD2L1 CDC23 CDC20 PSMD14 PSMD12 PSMA6 PSMA5 PSMA4 ANAPC11 PSMA7 PSMB5 PSMB4 PSMB2 PSMC2 PSMD2 PSMD4 PSME2 BUB1B	*	hsa-miR-802 (2.9e-118) hsa-miR-212 (2.3e-64) hsa-miR-765 (4.4e-27) hsa-miR-495 (1.8e-21) hsa-miR-132 (8.9e-18) hsa-miR-381 (3.4e-11) hsa-miR-507 (2.9e-10) hsa-miR-766 (1.2e-09)
REACTOME_TRAF6_MEDIATED_INDUCTION_OF_THE_ANTIVIRAL_CYTOKINE_IFN_ALPHA_BETA_CASCADE	MEF2C PPP2R1A MAP2K7 MAP2K4 PPP2CB RPS6KA5 RPS6KA2 NFKB1 MAPK11 MAPK10 TLR3		hsa-miR-130a (2.8e-37) hsa-miR-142-5p (7.1e-17) hsa-miR-23b (2.6e-14) hsa-miR-203 (9.9e-09) hsa-miR-19b (5e-08) hsa-miR-130b (2.6e-05) hsa-miR-20b (0.00071) hsa-miR-23a (0.00086) hsa-miR-19a (0.003) hsa-miR-25 (0.0073) hsa-miR-106b (0.0079)
REACTOME_MITOTIC_M_M_G1_PHASES	PPP2R5B INCENP STAG1 RCC2 ZWINT AHCTF1 NDC80 NUP107 KNTC1 ERCC6L KIF23 E2F1 E2F2 E2F3 KIF2C MAPRE1 AURKB FBXO5 DSN1 BIRC5 KIF20A RAD21 SPC25 ZW10 MLF1IP CDCA8 ORC1L CCDC99 NUF2 CDC6 BUB1 BUB3 XPO1 ORC6L PLK1 NUP85 ORC2L MAD2L1 CDC20 PMF1 CDT1 PSMD14 PSMD12 SGOL2 SGOL1 PSMA6 PSMA5 PSMA4 PSMA7 PSMB5 PSMB4 PSMB2 CKAP5 CASC5 PSMC2 MCM8 MCM7 PSMD2 PSMD4 MCM2 MCM3 MCM4 MCM5 MCM6 PSME2 BUB1B CENPA CENPO…	*	hsa-miR-802 (9.1e-241) hsa-miR-212 (2.5e-173) hsa-miR-507 (1.2e-80) hsa-miR-21 (2e-51) hsa-miR-132 (5.7e-47) hsa-miR-643 (1.3e-39) hsa-miR-10a (4e-38) hsa-miR-765 (1.1e-20) hsa-miR-519a (6e-19) hsa-miR-10b (1.6e-17) hsa-miR-433 (8.7e-17) hsa-miR-122a (9.1e-17) hsa-miR-34c (1.3e-15) hsa-miR-342 (1.6e-15) hsa-miR-30b (1.1e-11) hsa-miR-34a (1.6e-10) hsa-miR-124 (3.4e-09) hsa-miR-216 (2.8e-08) hsa-mi…
REACTOME_SIGNALING_BY_TGF_BETA	TGFB1 UBE2D3 UBE2D1 TGFBR1 TGFBR2 SMAD4 SMAD3 SMAD2		hsa-miR-301 (8.9e-11) hsa-miR-130a (4.1e-09) hsa-miR-93 (0.00028) hsa-miR-200c (0.00054) hsa-miR-130b (0.00066) hsa-miR-18a (0.0025) hsa-miR-23b (0.0037) hsa-miR-142-5p (0.0048) hsa-miR-16 (0.0078) hsa-miR-372 (0.0083) hsa-miR-145 (0.0097)
REACTOME_REV_MEDIATED_NUCLEAR_EXPORT_OF_HIV1_RNA	RAE1 NUP107 RAN SEH1L RANBP1 TPR NUP160 NUP155 AAAS NUP205 NUP214 NUP210 XPO1 NUP85 NUP98 NUP93 NUP35 NUP43 NUP62 NUPL2 POM121		hsa-miR-132 (2.4e-48) hsa-miR-212 (3.9e-41) hsa-miR-216 (2.1e-09) hsa-let-7b (2.6e-07) hsa-miR-30b (1e-06) hsa-miR-342 (1e-05) hsa-miR-21 (2.5e-05) hsa-miR-514 (0.00012) hsa-let-7c (0.00093) hsa-miR-98 (0.006) hsa-let-7g (0.0068) hsa-miR-320 (0.0076)
REACTOME_INNATE_IMMUNITY_SIGNALING	MEF2C MEF2A PIK3C3 MAPK3 IGKC C8A RIPK1 C7 C3 C6 C5 DUSP4 PPP2R1A C1QC C1QB LY86 LY96 SIGIRR CD180 CD14 IRAK4 FOS CHUK C1S MAP3K1 MASP1 MAP2K7 MAP2K1 MAP2K2 MAP2K3 MAP2K4 EEA1 PPP2CB RPS6KA5 RPS6KA3 RPS6KA1 RPS6KA2 TRAF6 TLR10 ZFYVE20 CFD NFKB1 MAPK11 MAPK10 TLR1 TLR2 TLR3 TLR4 TLR5 TLR6 TLR7 TLR8 RIPK3		hsa-miR-19a (2.6e-17) hsa-miR-424 (1.9e-16) hsa-miR-130a (3.1e-16) hsa-miR-203 (2.7e-12) hsa-miR-302a (7.2e-07) hsa-miR-19b (7.6e-07) hsa-miR-181b (1.1e-06) hsa-miR-106b (1.6e-06) hsa-miR-367 (1.5e-05) hsa-miR-372 (3.1e-05) hsa-miR-32 (0.00011) hsa-miR-182 (0.00021) hsa-miR-23b (0.00021) hsa-miR-130b (0.00023) hsa-miR-142-5p (0.00081) hsa-miR-106a (0.00082) hsa-miR-181a (0.0014) hsa-miR-96 (0.001…
REACTOME_SEMA4D_INDUCED_CELL_MIGRATION_AND_GROWTH_CONE_COLLAPSE	MYH9 RAC2 RAC1 ARHGEF12 ROCK1 ROCK2 MYH11 RHOA MYL9		hsa-miR-130a (6.6e-14) hsa-miR-301 (3.6e-10) hsa-miR-130b (1.2e-07) hsa-miR-101 (5.7e-05) hsa-miR-19b (0.00013) hsa-miR-485-3p (0.0011) hsa-miR-199b (0.0015) hsa-miR-218 (0.0018) hsa-miR-182 (0.003) hsa-miR-542-3p (0.0036) hsa-miR-142-5p (0.0049)
REACTOME_SEMA3A_PAK_DEPENDENT_AXON_REPULSION	NRP1 FYN FES HSP90AA1		hsa-miR-130b (3.5e-12) hsa-miR-142-5p (1e-08) hsa-miR-130a (8.7e-07) hsa-miR-301 (0.0004) hsa-miR-27b (0.0048)
REACTOME_MRNA_SPLICING_MINOR_PATHWAY	SF3B1 TXNL4A NCBP2 NCBP1 SNRPD3 SNRPD1 SNRPD2 PRPF6 SF3B14 LSM2 SFRS1 SFRS2 POLR2H POLR2G POLR2F POLR2K POLR2J POLR2D SNRPB SNRPF SNRPE SNRPG	*	hsa-miR-132 (2e-71) hsa-miR-212 (4.9e-53) hsa-miR-134 (3.1e-31) hsa-miR-10a (1.4e-24) hsa-miR-432 (3.4e-10) hsa-miR-10b (1.1e-08) hsa-miR-622 (7.8e-06) hsa-miR-495 (2.2e-05) hsa-miR-190 (0.0012) hsa-miR-133b (0.0063)
REACTOME_REMOVAL_OF_THE_FLAP_INTERMEDIATE_FROM_THE_C_STRAND	FEN1 PCNA POLD1		hsa-miR-154 (6.7e-28) hsa-miR-610 (7.5e-12) hsa-miR-217 (3.5e-08)
REACTOME_TRAFFICKING_OF_AMPA_RECEPTORS	AP2B1 GRIA3 AP2A2 GRIA2 CAMK2D NSF		hsa-miR-203 (1.1e-12) hsa-miR-23b (0.00036) hsa-miR-335 (0.00067) hsa-miR-181b (0.0032) hsa-miR-770-5p (0.0033) hsa-miR-31 (0.0048) hsa-miR-32 (0.005) hsa-miR-27b (0.0091)
REACTOME_RNA_POLYMERASE_II_TRANSCRIPTION	SFRS11 TAF11 TAF13 THOC4 NCBP2 NCBP1 PABPN1 SUPT16H UPF3B GTF2H4 TCEB3 TCEB1 GTF2E1 TAF4 TAF5 WHSC2 CPSF3 CPSF1 RBM8A SFRS9 U2AF1 SUPT5H SFRS1 SFRS2 PCF11 ELL CCNT1 POLR2H POLR2G POLR2K POLR2J POLR2D CSTF2 RNPS1 CSTF1	*	hsa-miR-802 (4.3e-48) hsa-miR-132 (3.4e-44) hsa-miR-212 (2.7e-43) hsa-miR-134 (2.4e-38) hsa-miR-10a (1.3e-29) hsa-miR-21 (4.1e-13) hsa-let-7g (9.3e-13) hsa-miR-320 (2.9e-10) hsa-miR-190 (5.7e-09) hsa-miR-507 (9.2e-09) hsa-miR-217 (7.3e-07) hsa-miR-432 (2.7e-06) hsa-miR-495 (8.4e-06) hsa-let-7b (2.3e-05) hsa-miR-34c (2.6e-05) hsa-miR-148a (0.00052) hsa-miR-133a (0.0007) hsa-miR-10b (0.002) hsa-miR…
REACTOME_DEADENYLATION_OF_MRNA	EIF4A2 EIF4B EIF4E CNOT1 CNOT7 CNOT6L		hsa-miR-19a (4.1e-08) hsa-miR-203 (4e-06) hsa-miR-181b (5.9e-06) hsa-miR-200c (0.00031) hsa-miR-130a (0.0026) hsa-miR-145 (0.0097)
REACTOME_LATE_PHASE_OF_HIV_LIFE_CYCLE	RAE1 TAF11 TAF13 NUP107 NCBP2 NCBP1 RAN SUPT16H SEH1L TH1L RANBP1 TPR NUP155 AAAS GTF2H4 NUP205 NUP214 NUP210 TCEB3 TCEB1 XPO1 GTF2E1 GTF2E2 TAF4 TAF5 WHSC2 NUP85 SUPT5H NUP35 NUP43 ELL NUP62 CCNT1 POLR2H POLR2G POLR2F POLR2K POLR2J POLR2D POM121	*	hsa-miR-212 (7.6e-55) hsa-miR-132 (1.2e-45) hsa-miR-21 (2.1e-19) hsa-miR-320 (1e-13) hsa-miR-34c (1.3e-11) hsa-miR-495 (1.8e-07) hsa-let-7b (3.7e-07) hsa-miR-148b (0.00063) hsa-miR-342 (0.00084) hsa-let-7e (0.00098) hsa-miR-216 (0.0034) hsa-miR-29b (0.0049)
REACTOME_MAPK_TARGETS_NUCLEAR_EVENTS_MEDIATED_BY_MAP_KINASES	MEF2C PPP2CB RPS6KA5 MAPK10		hsa-miR-20b (9.7e-08) hsa-miR-130a (2.8e-06) hsa-miR-19b (4.3e-06) hsa-miR-182 (6e-06) hsa-miR-203 (1.1e-05) hsa-miR-130b (1.4e-05) hsa-miR-142-5p (6.1e-05) hsa-miR-23b (0.00081) hsa-miR-372 (0.0011) hsa-miR-106b (0.0013)
REACTOME_RNA_POLYMERASE_III_TRANSCRIPTION_INITIATION_FROM_TYPE_3_PROMOTER	LZTS1 POLR2H POLR2K POLR3A POLR3E		hsa-miR-504 (2.6e-11) hsa-miR-580 (0.0012)
REACTOME_TIE2_SIGNALING	HRAS PIK3CA NRAS KRAS GRB2 GRB7 SHC1 PIK3R2 GRB14 SOS1		hsa-miR-134 (3.5e-15) hsa-let-7e (6.8e-07) hsa-miR-217 (1.1e-05) hsa-let-7i (4.7e-05) hsa-let-7b (4.9e-05) hsa-miR-216 (7.2e-05) hsa-let-7a (0.0012) hsa-miR-10a (0.0018) hsa-let-7d (0.0023) hsa-miR-28 (0.0033) hsa-miR-190 (0.0053) hsa-let-7c (0.0095)
REACTOME_P75_NTR_RECEPTOR_MEDIATED_SIGNALLING	ARHGEF16 ARHGEF11 FGD1 FGD3 HDAC1 IKBKB CASP3 CASP2 NCSTN OBSCN IRAK1 PRKCI NGEF BCL2L11 ARHGEF2 ARHGEF7 ARHGEF9 PLEKHG2 SOS1 VAV3 VAV2 VAV1 TRIO ADAM17 RIPK2 ARHGAP4 ECT2		hsa-miR-132 (0.0024)
REACTOME_DOPAMINE_NEUROTRANSMITTER_RELEASE_CYCLE	RIMS1 STX1A RAB3A TH DDC SYT1 SYN2		hsa-let-7b (0.00032) hsa-let-7g (0.00085) hsa-miR-98 (0.0019)
REACTOME_SCF_SKP2_MEDIATED_DEGRADATION_OF_P27_P21	CKS1B CCNA2 SKP2 CCNE2 CCNE1 CDK2 PSMD14 PSMD12 PSMA6 PSMA5 PSMA4 PSMA7 PSMB5 PSMB4 PSMB2 PSMC2 PSMD2 PSMD4 PSME2	*	hsa-miR-802 (8.1e-81) hsa-miR-507 (2.6e-78) hsa-miR-132 (1.5e-53) hsa-miR-212 (8.2e-15) hsa-miR-503 (1.4e-11) hsa-miR-765 (4.6e-10) hsa-miR-34a (0.00054) hsa-miR-34c (0.00055) hsa-miR-26a (0.0019) hsa-miR-449b (0.003) hsa-miR-30c (0.0082)
REACTOME_EARLY_PHASE_OF_HIV_LIFE_CYCLE	LIG1 FEN1 PPIA HMGA1		hsa-miR-610 (0.001)
REACTOME_ACTIVATION_OF_KAINATE_RECEPTORS_UPON_GLUTAMATE_BINDING	GNG2 GNG7 GNB5 GNG11 NCALD CALM2 CALM1		hsa-miR-19a (9e-10) hsa-miR-130a (1.4e-08) hsa-miR-181b (1.9e-08) hsa-miR-770-5p (1.6e-07) hsa-miR-20b (5.4e-06) hsa-miR-19b (1.9e-05) hsa-miR-301 (2.5e-05) hsa-miR-302a (0.00011) hsa-miR-372 (0.00023) hsa-miR-106a (0.00053) hsa-miR-302b (0.00085) hsa-miR-130b (0.0024) hsa-miR-17-5p (0.009)
REACTOME_P130CAS_LINKAGE_TO_MAPK_SIGNALING_FOR_INTEGRINS	ITGB3 RAP1A RAP1B VWF APBB1IP FGG FGA FGB TLN1 CRK		hsa-miR-203 (2.2e-06) hsa-miR-32 (0.001) hsa-miR-142-5p (0.0053) hsa-miR-101 (0.0067)
REACTOME_STABILIZATION_OF_P53	ATM PSMD14 PSMD12 PSMA6 PSMA5 PSMA4 PSMA7 PSMB5 PSMB4 PSMB2 PSMC4 PSMC2 PSMD1 PSMD2 PSMD4 PSME2		hsa-miR-802 (5.8e-66) hsa-miR-212 (1.7e-34) hsa-miR-132 (3.2e-22) hsa-miR-507 (3.2e-20) hsa-miR-765 (1.3e-08) hsa-miR-620 (1.6e-05)
REACTOME_HIV_LIFE_CYCLE	RAE1 LIG1 TAF11 TAF13 NUP107 FEN1 NCBP2 NCBP1 SUPT16H SEH1L TH1L PPIA RANBP1 NUP155 AAAS GTF2H4 NUP205 NUP214 NUP210 TCEB3 TCEB1 XPO1 GTF2E1 TAF4 TAF5 WHSC2 NUP85 HMGA1 SUPT5H NUP43 ELL NUP62 CCNT1 POLR2H POLR2G POLR2F POLR2K POLR2J POLR2D	*	hsa-miR-212 (2.7e-65) hsa-miR-132 (8.8e-63) hsa-miR-21 (1.1e-11) hsa-let-7e (1.9e-11) hsa-miR-34c (1e-09) hsa-miR-495 (7.7e-09) hsa-miR-610 (7e-07) hsa-miR-320 (1.9e-05) hsa-let-7b (2e-05) hsa-let-7g (0.00012) hsa-miR-24 (0.00025) hsa-miR-190 (0.00043) hsa-miR-26a (0.0022) hsa-let-7a (0.0025) hsa-let-7c (0.0026) hsa-miR-34a (0.0037)
