# Supplementary material for: Important miRs of Pathways in Different Tumor Types
Source: PLoS Comput Biol. 2013 Jan 24;9(1):e1002883. doi: 10.1371/journal.pcbi.1002883 (PMC3554575; doi:10.1371/journal.pcbi.1002883)
Supplement: Table S4 — Pairs of significantly associated miRs and pathways in breast cancer. 309 pathways that were significantly associated to miRs in breast cancer. Each pathway is annotated with its leading edge genes and important miRs. P-Values are indicated in parentheses. Furthermore, we indicate if a pathway is differentially expressed (DE) with FDR<0.01. (XLS) [file pcbi.1002883.s011.xls]

## Sheet: TableS1.txt
Table S4: 309 pathways that are significantly associated to miRs in breast cancer. Each pathway is annotated with its leading edge genes and important miRs. P-Values are indicated in parentheses. Furthermore, we indicate if a pathway is differentially expressed (DE) with FDR < 0.01.
pathway	leading edges	DE	important miRs
REACTOME_PHASE_1_FUNCTIONALIZATION	PTGS2 CYP1A1 CYP1A2 MAOA MAOB FMO3 CYP2A6 CYP4A11 CYP3A4 PTGIS		hsa-miR-149 (7.4e-10) hsa-miR-101 (6.4e-08) hsa-miR-144 (0.0055)
REACTOME_ACTIVATION_OF_THE_AP1_FAMILY_OF_TRANSCRIPTION_FACTORS	JUN FOS		hsa-miR-92 (1.3e-09) hsa-miR-144 (0.0017) hsa-miR-101 (0.0019) hsa-miR-181b (0.0039)
REACTOME_TRKA_SIGNALLING_FROM_THE_PLASMA_MEMBRANE	HRAS BRAF MAPK1 THEM4 NRAS GSK3A GSK3B RALA FRS2 MAPKAPK3 MAPKAPK2 BAD CAMK4 KRAS RIT1 PDPK1 YWHAB GRB2 SHC1 PRKCD MDM2 TRIB3 PIK3R2 MAP2K2 RPS6KB2 PRKAR2A AKT1S1 PRKAR1B TSC2 ADCY1 ADCY7 ADRBK1 ITPR3 STAT3 MAPK12 ADCY9 MAPK13 SRC AKT1		hsa-miR-148a (6.5e-09) hsa-miR-320 (2.1e-05) hsa-let-7f (0.00015) hsa-miR-152 (0.00041)
REACTOME_GLUCOSE_REGULATION_OF_INSULIN_SECRETION	CACNB3 FH NDUFB11 NDUFB10 SDHC NDUFAB1 CYC1 UQCRQ UQCRH GCK MDH2 ALDOA IDH2 ATP5D ATP5E KCNJ11 ATP5H ATP5J STX1A COX5A COX5B COX6C COX8A UQCRC1 PFKL GAPDH NDUFA13 NDUFA11 IDH3G SLC2A1 ATP5J2 NDUFV3 NDUFV1 NDUFV2 CACNA1D NDUFS6 NDUFS8 NDUFS3 NDUFS2 ATP5G1 PFKFB4 PFKFB2 TPI1 COX6B1 COX6A1 SLC25A5 PGK1 NDUFC2 NDUFC1 NDUFB4 NDUFB9 NDUFB1 NDUFB2 ENO2 NDUFA2 NDUFA3 NDUFA8 NDUFA6 NDUFA7 NDUFA1 GPI		hsa-miR-148b (0.0071)
REACTOME_MRNA_3_END_PROCESSING	NCBP2 NCBP1 NFX1 CPSF3 CPSF2 CPSF1 U2AF2 RBM8A SFRS9 PAPOLA CSTF3 CSTF2 RNPS1 CSTF1		hsa-miR-125a (0.00011) hsa-miR-125b (0.00093) hsa-miR-1 (0.0036)
REACTOME_SIGNAL_AMPLIFICATION	GNG2 GNG7 GNAI1 GNG13 GNG11 P2RY12 PLA2G4A		hsa-miR-485-3p (2.2e-29) hsa-miR-19b (2e-09) hsa-miR-218 (0.00017) hsa-miR-19a (0.0023) hsa-miR-543 (0.0025)
REACTOME_NCAM_SIGNALING_FOR_NEURITE_OUT_GROWTH	HRAS MAPK1 CACNB3 NRAS PTK2 COL5A2 COL5A1 KRAS ARTN YWHAB GRB2 SPTBN2 MAP2K2 COL1A2 COL1A1 CACNA1D AGRN		hsa-miR-148a (0.0035) hsa-miR-30b (0.0068) hsa-miR-155 (0.0091)
REACTOME_TRANSMEMBRANE_TRANSPORT_OF_SMALL_MOLECULES	RAE1 SLC20A1 ABCA7 SLC13A2 SLC1A4 SLC1A1 SLC43A2 SLC7A11 GCK SLC11A1 SEH1L SLC24A2 SLC24A6 SLC39A10 SLC16A3 NUP188 TPR SLC39A7 SLC39A3 SLC39A1 NUP155 SLC9A8 SLC9A7 SLC9A1 NUP205 HK1 NUP214 NUP210 HK3 SLC4A8 SLC44A4 SLC2A1 NUP85 NUP98 NUP93 SLC12A7 SLC2A10 NUP50 NUP62 ABCD1 SLC4A2 SLC4A1 NUPL1 SLC38A5 SLC30A1 SLC30A6 SLC30A7 SLC6A9 SLC6A5 SLC6A6		hsa-miR-217 (0.0016) hsa-miR-148a (0.0024)
REACTOME_CENTROSOME_MATURATION	TSGA14 CSNK1D SSNA1 TUBG1 TUBG2 NDE1 TUBA4A NEK2 ALMS1 CEP250 CETN2 YWHAG CEP72 CEP78 CEP70 FGFR1OP TUBGCP2 TUBB2C PCNT NUMA1 CCNB1 AZI1 TUBB PLK4 PLK1 ODF2 CEP164 CKAP5	*	hsa-miR-185 (1.2e-18) hsa-miR-155 (7.6e-12) hsa-miR-125a (1.3e-09) hsa-miR-186 (1.3e-05) hsa-let-7g (9.5e-05) hsa-miR-217 (0.00032) hsa-miR-28 (0.00098) hsa-miR-132 (0.001) hsa-miR-212 (0.0013) hsa-miR-30c (0.0031)
REACTOME_ACTIVATION_OF_THE_PRE_REPLICATIVE_COMPLEX	DBF4 RPA3 ORC1L CDC7 CDC6 POLA1 POLA2 POLE2 ORC6L ORC5L ORC2L PRIM2 POLE CDT1 MCM10 MCM8 MCM2 MCM3 MCM4 MCM5 MCM6	*	hsa-miR-185 (4.7e-10) hsa-miR-30b (8.4e-06) hsa-miR-643 (8.9e-05) hsa-miR-206 (0.0007) hsa-miR-30e-3p (0.002) hsa-miR-515-5p (0.0031)
REACTOME_MRNA_PROCESSING	NCBP2 NCBP1 ERCC3 ERCC2 GTF2H4 GTF2H3 RNMT CDK7 ADAR RNGTT POLR2H POLR2G POLR2K POLR2J POLR2I POLR2D		hsa-miR-496 (1.5e-18) hsa-miR-1 (0.0017)
REACTOME_PI3K_CASCADE	FGF7 FGF9 FGF2 IRS2 IRS1 KL FGF10 FGFR1 PIK3R1		hsa-miR-181c (8.9e-18) hsa-miR-181b (1.5e-14) hsa-miR-181a (4.8e-14) hsa-miR-145 (1.9e-09) hsa-miR-33 (1.8e-07) hsa-miR-424 (6.4e-07) hsa-miR-16 (4.4e-05) hsa-miR-15b (0.00012) hsa-miR-92 (0.00064) hsa-miR-183 (0.0018) hsa-miR-96 (0.0091)
REACTOME_A_THIRD_PROTEOLYTIC_CLEAVAGE_RELEASES_NICD	PSENEN APH1A PSEN1 PSEN2		hsa-miR-205 (0.00014)
REACTOME_THE_ROLE_OF_NEF_IN_HIV1_REPLICATION_AND_DISEASE_PATHOGENESIS	RAC1 ARF1 AP2S1 AP2M1 AP2B1 AP2A2 AP2A1 PACS1 AP1S3 AP1S1 AP1G1 DOCK2 ATP6V1H AP1M1 AP1M2 HCK AP1B1 PAK2		hsa-miR-9 (5.7e-08) hsa-miR-299-3p (9.9e-08) hsa-miR-148a (2.4e-07) hsa-let-7b (3.6e-07) hsa-miR-34b (4.5e-06) hsa-miR-30e-5p (2.5e-05) hsa-miR-206 (4.3e-05) hsa-miR-1 (0.00015) hsa-miR-138 (0.0011) hsa-miR-148b (0.0016) hsa-miR-152 (0.0023) hsa-miR-30c (0.0044)
REACTOME_BASE_FREE_SUGAR_PHOSPHATE_REMOVAL_VIA_THE_SINGLE_NUCLEOTIDE_REPLACEMENT_PATHWAY	NTHL1 OGG1 CCNO MPG TDG SMUG1 POLB		hsa-miR-30b (3.4e-06) hsa-let-7b (2.6e-05) hsa-miR-1 (4.3e-05) hsa-miR-320 (0.0092)
REACTOME_PHASE_II_CONJUGATION	MAT2B UGT2B28 UGT2B11 UGT2B10 UGP2 GSTA2 GSTA3 GSTA4 GSTA5 GLYAT ACSM2B SULT1C4 GSTM5 GCLC GSTP1 UGT1A8 UGT2A1 UGT2B4 UGT2B7 MGST1 MGST2		hsa-miR-92 (1.4e-44) hsa-miR-142-5p (2.4e-30) hsa-miR-92b (3.2e-23) hsa-miR-367 (1.5e-16) hsa-miR-106b (1.7e-11) hsa-miR-485-3p (8.1e-09) hsa-miR-32 (2.6e-06) hsa-miR-25 (1.1e-05) hsa-miR-137 (5.8e-05) hsa-miR-20a (0.00093) hsa-miR-301 (0.0096)
REACTOME_VIRAL_MRNA_TRANSLATION	RPL18 RPL14 RPL13 RPL15 RPLP2 RPL10 FAU RPL11 RPL12 RPS18 RPS17 RPS14 RPS15 RPS13 RPS10 RPS11 RPS25 RPS27 RPS29 RPS20 RPS21 RPS23 RPS24 RPS9 RPS6 RPS5 RPS8 RPS7 RPL41 RPL35 RPL37 RPL38 RPL39 RPL30 RPL32 RPL31 RPL34 RPL26 RPL27 RPL24 RPL29 RPL23 RPL22 RPL21 RPS27A RPL35A RPL6 RPL9 RPL3 RPL5 RPL10A RPL7A RPL4 RPL37A RPS3 RPS3A RPS4X RPS15A RPL13A RPL27A	*	hsa-miR-142-5p (7.5e-133) hsa-miR-376b (3e-51) hsa-miR-218 (6.3e-28) hsa-miR-376a (1.7e-15) hsa-miR-137 (2e-08) hsa-miR-21 (8.1e-06) hsa-miR-135a (0.00052)
REACTOME_TRANSPORT_OF_MATURE_MRNA_DERIVED_FROM_AN_INTRON_CONTAINING_TRANSCRIPT	RAE1 NCBP2 NCBP1 SEH1L NUP188 TPR NUP155 NUP205 NUP214 NUP210 NUP85 NUP98 NUP93 U2AF2 SFRS9 NUP50 NUP62 NUPL1 RNPS1		hsa-miR-125a (5.2e-13) hsa-miR-185 (5.2e-07) hsa-miR-514 (2.6e-05) hsa-miR-1 (0.00013) hsa-miR-129-3p (0.0022)
REACTOME_REGULATION_OF_LIPID_METABOLISM_BY_PEROXISOME_PROLIFERATOR_ACTIVATED_RECEPTOR_ALPHA	EHHADH ACSL1 SMARCD3 ME1 ABCA1 ANGPTL4 FABP4 ACADM CHD9 CYP4A11 CD36 NR1H3 SLC27A1 PPARA LPL UCP1 UGT2B4 SCP2		hsa-miR-130a (2.1e-23) hsa-miR-142-5p (1.6e-18) hsa-miR-181c (3.7e-11) hsa-miR-19a (1.7e-06) hsa-miR-181a (7.8e-06) hsa-miR-25 (1.3e-05) hsa-miR-145 (5.3e-05) hsa-miR-20a (0.00019) hsa-miR-101 (0.00055) hsa-miR-183 (0.00057) hsa-miR-20b (0.0008) hsa-miR-218 (0.0023) hsa-miR-301 (0.0027) hsa-miR-181b (0.004)
REACTOME_METABOLISM_OF_NITRIC_OXIDE	NOSTRIN CALM1 CAV1		hsa-miR-770-5p (0.00029)
REACTOME_BIOLOGICAL_OXIDATIONS	PTGS2 CYP1A1 CYP2B6 MAOA MAOB CYP17A1 CYP2C18 FMO2 FMO3 MAT2B ADH1C ADH1B ADH1A UGT2B28 UGT2B11 CYP2A6 UGT2B10 UGP2 CYP2U1 ALDH1A1 ADH4 GSTA2 GSTA3 GSTA4 GSTA5 CYP4A11 GLYAT CYP3A4 CYP3A5 CYP3A7 ACSM2B CYP4B1 CYP39A1 SULT1C4 ACSS2 GSTM5 PTGIS GCLC ALDH2 CYP11A1 GSTP1 UGT1A8 CYP26B1 UGT2A1 UGT2B4 UGT2B7 MGST1 MGST2	*	hsa-miR-142-5p (8.9e-37) hsa-miR-25 (4e-23) hsa-miR-149 (3.6e-21) hsa-miR-20a (6.2e-20) hsa-miR-144 (7e-18) hsa-miR-485-3p (7.9e-18) hsa-miR-15b (2.2e-12) hsa-miR-92 (1.1e-09) hsa-miR-367 (1.6e-09) hsa-miR-137 (3e-08) hsa-miR-130a (3.1e-08) hsa-miR-130b (2e-05) hsa-miR-15a (2e-05) hsa-miR-92b (4e-05) hsa-miR-101 (0.00027) hsa-miR-106b (0.00049) hsa-miR-575 (0.002) hsa-miR-769-5p (0.0026) hsa-miR-…
REACTOME_MYD88_CASCADE	MYD88 SIGIRR IRAK4 IRAK1 TIRAP		hsa-miR-142-3p (0.00011)
REACTOME_GLYCOLYSIS	PFKFB3 ALDOC PFKFB1 PFKM		hsa-miR-19b (0.0015) hsa-miR-19a (0.0042)
REACTOME_AKT_PHOSPHORYLATES_TARGETS_IN_THE_CYTOSOL	GSK3A GSK3B BAD PDPK1 MDM2 AKT1S1 TSC2 AKT1		hsa-miR-142-3p (3.9e-05)
REACTOME_RNA_POL_II_CTD_PHOSPHORYLATION_AND_INTERACTION_WITH_CE	ERCC3 ERCC2 GTF2H4 GTF2H3 RNMT CDK7 RNGTT POLR2H POLR2G POLR2K POLR2J POLR2I POLR2D		hsa-miR-496 (1.7e-05)
REACTOME_RETROGRADE_NEUROTROPHIN_SIGNALLING	AP2S1 AP2M1 NTRK1 AP2B1 AP2A2 AP2A1 DNAL4 CLTC		hsa-miR-125b (8e-06) hsa-miR-205 (0.00051) hsa-miR-125a (0.006)
REACTOME_AMINE_LIGAND_BINDING_RECEPTORS	HTR1B HTR5A HTR2A DRD2 DRD5 ADRA2A ADRA2C ADRA2B ADRA1B ADRA1A ADRB2 ADRB1 CHRM3 HRH2 HTR7 TAAR9		hsa-miR-23b (9.8e-12) hsa-miR-101 (1.1e-08) hsa-miR-218 (4.3e-08) hsa-miR-32 (8.4e-05) hsa-miR-424 (0.001)
REACTOME_M_G1_TRANSITION	E2F2 E2F3 ORC1L CDC6 ORC6L ORC5L ORC2L CDT1 PSMD14 PSMD13 PSMD11 PSMA6 PSMA4 PSMA3 PSMA7 PSMB4 PSMB3 PSMB2 PSMC4 PSMC3 PSMC2 MCM8 PSMD1 PSMD2 PSMD3 PSMD4 PSMD8 MCM2 MCM3 MCM4 MCM5 MCM6 PSME1 PSME2 PSME3	*	hsa-miR-186 (1.1e-42) hsa-miR-125b (1.4e-12) hsa-miR-802 (1.5e-12) hsa-miR-125a (3e-12) hsa-miR-146a (5.3e-12) hsa-miR-185 (2.1e-08) hsa-miR-200a (3.3e-07) hsa-miR-146b (4.5e-07) hsa-miR-30b (2.5e-06) hsa-miR-767-3p (8.4e-06) hsa-miR-555 (1.7e-05) hsa-miR-643 (2.8e-05) hsa-miR-30d (0.0002) hsa-miR-30c (0.00022) hsa-miR-515-5p (0.00039) hsa-miR-27b (0.0083)
REACTOME_LOSS_OF_NLP_FROM_MITOTIC_CENTROSOMES	TSGA14 CSNK1D SSNA1 TUBG1 NDE1 TUBA4A NEK2 ALMS1 CEP250 CETN2 YWHAG CEP72 CEP78 CEP70 FGFR1OP TUBB2C PCNT AZI1 TUBB PLK4 PLK1 ODF2 CEP164 CKAP5	*	hsa-miR-28 (4.3e-08) hsa-miR-185 (1.7e-07) hsa-miR-217 (2.3e-06) hsa-miR-125a (5.1e-05) hsa-miR-155 (0.00074) hsa-miR-30c (0.0034) hsa-miR-186 (0.0039) hsa-let-7g (0.007)
REACTOME_SYNTHESIS_AND_INTERCONVERSION_OF_NUCLEOTIDE_DI_AND_TRIPHOSPHATES	TXN TXNRD1 AK2 NME4 NME1 RRM2 CTPS2 CTPS DTYMK GUK1 GSR	*	hsa-miR-372 (0.0043)
REACTOME_ASSOCIATION_OF_TRIC_CCT_WITH_TARGET_PROTEINS_DURING_BIOSYNTHESIS	ARFGEF2 CCT6A SKIV2L FBXW9 CCT2 CCT3 FBXO6 CCT5		hsa-miR-24 (0.0012)
REACTOME_HORMONE_BIOSYNTHESIS	PTGS2 HSD11B1 CYP17A1 DPEP2 HSD3B1 HSD17B3 LRP2 DDC TSHB STAR POMC PTGIS CYP11B1 TPO CYP11A1 LTA4H		hsa-miR-19a (2.6e-10) hsa-miR-19b (4.5e-09) hsa-miR-101 (3.3e-08) hsa-miR-149 (7.7e-07) hsa-miR-144 (3.9e-05) hsa-miR-142-5p (0.00042)
REACTOME_EGFR_DOWNREGULATION	EGFR SPRY2 SPRY1		hsa-miR-142-5p (1.3e-07) hsa-miR-23b (4.7e-07) hsa-miR-323 (0.0053)
REACTOME_ELONGATION_AND_PROCESSING_OF_CAPPED_TRANSCRIPTS	CCAR1 PTBP1 DHX9 SF3B4 SF3B3 SF3B2 SSRP1 TXNL4A NCBP2 NCBP1 SNRPD3 SNRPD1 PRPF4 PRPF6 FUS SUPT16H CTDP1 TH1L ERCC3 ERCC2 LSM2 RDBP GTF2H4 GTF2H3 SUPT4H1 TCEB2 TCEB3 TCEB1 DDX23 SNRPA1 HNRNPU HNRNPL WHSC2 NFX1 CDK7 CPSF3 CPSF2 CPSF1 U2AF2 RBM8A SFRS9 SFRS2 ELL POLR2H POLR2G POLR2K POLR2J POLR2I POLR2D SF4 CD2BP2 PAPOLA EFTUD2 SNRPB SNRPF SNRPE SNRPG CSTF3 CSTF2 RNPS1 SMC1A CSTF1	*	hsa-miR-30b (6.1e-12) hsa-miR-496 (1.2e-08) hsa-miR-302b (5.7e-07) hsa-miR-302a (1.2e-05) hsa-miR-212 (0.0026) hsa-miR-24 (0.006) hsa-miR-372 (0.0076)
REACTOME_PP2A_MEDIATED_DEPHOSPHORYLATION_OF_KEY_METABOLIC_FACTORS	PPP2CB PPP2R1B PFKFB3 PFKFB1 MLXIPL		hsa-miR-183 (1.7e-15) hsa-miR-130b (9.9e-15) hsa-miR-19a (6.2e-13) hsa-miR-301 (8.3e-06) hsa-miR-19b (1.9e-05) hsa-miR-130a (0.0029)
REACTOME_INTEGRIN_CELL_SURFACE_INTERACTIONS	MADCAM1 APBB1IP SOS1 FGA FGB JAM2 JAM3 VCAM1 COL4A3 RAPGEF3 LAMC3 LAMC1 LAMB2 LAMB1 LAMA2 LAMA1 ICAM2 COL2A1 AMICA1 VTN ITGAE ITGB4 ITGB1 ITGB8 ITGA3 ITGA9 ITGA6 ITGA7 RAP1A RAP1B TLN1 RASGRP2 VWF		hsa-miR-181a (2.3e-06) hsa-miR-145 (5.5e-05) hsa-miR-92 (0.00013) hsa-miR-25 (0.00057) hsa-miR-367 (0.0012) hsa-miR-181c (0.0022) hsa-miR-20a (0.0039)
REACTOME_PEPTIDE_CHAIN_ELONGATION	RPL18 RPL14 RPL13 RPL15 RPLP2 RPL10 FAU RPL11 RPL12 RPS18 RPS17 RPS14 RPS15 RPS13 RPS10 RPS11 RPS25 RPS27 RPS29 RPS20 RPS21 RPS23 RPS24 RPS9 RPS6 RPS5 RPS8 RPS7 RPL41 RPL35 RPL37 RPL38 RPL39 RPL30 RPL32 RPL31 RPL34 RPL26 RPL27 RPL24 RPL29 RPL23 RPL22 RPL21 RPS27A RPL35A RPL6 RPL9 RPL3 RPL5 RPL10A RPL7A RPL4 RPL37A RPS3 RPS3A RPS4X RPS15A RPL13A RPL27A EEF1A1	*	hsa-miR-142-5p (1.4e-84) hsa-miR-218 (7.7e-74) hsa-miR-376b (1e-35) hsa-miR-21 (3.8e-29) hsa-miR-376a (4.8e-27) hsa-miR-137 (3.2e-13) hsa-miR-543 (4.4e-12) hsa-miR-33 (2.6e-07) hsa-miR-135b (9.3e-06) hsa-miR-135a (4.8e-05) hsa-miR-33b (0.00096) hsa-miR-586 (0.0066)
REACTOME_POST_NMDA_RECEPTOR_ACTIVATION_EVENTS	HRAS GRIN2D MAPK1 CAMK4 PDPK1 CAMK2A RPS6KA1 ACTN2 RASGRF1 ADCY1 CAMKK1		hsa-miR-125b (3.9e-05) hsa-miR-125a (0.00099) hsa-miR-152 (0.004)
REACTOME_REMOVAL_OF_THE_FLAP_INTERMEDIATE_FROM_THE_C_STRAND	FEN1 RPA3 PCNA POLD4 POLD1 POLD2		hsa-miR-154 (2.1e-05)
REACTOME_COMPLEMENT_CASCADE	MASP1 MASP2 IGKV1-5 IGKC C8B C7 C9 C3 C6 C5 CFD MBL2 C1S		hsa-let-7e (0.00016)
REACTOME_SLC_MEDIATED_TRANSMEMBRANE_TRANSPORT	SLC20A1 SLC3A2 SLC13A2 SLC5A11 SLC1A4 SLC1A5 SLC1A2 SLC1A1 SLC43A2 SLC7A11 SLC41A2 SLC11A1 SLC31A1 SLC24A2 SLC24A6 SLC26A6 SLC39A10 SLC16A3 SLC5A3 SLC39A7 SLC39A6 SLC39A4 SLC39A3 SLC39A1 SLC9A8 SLC9A7 SLC9A4 SLC9A1 SLC4A8 SLC44A2 SLC44A4 SLC7A9 SLC7A5 SLC7A7 SLC2A8 SLC2A6 SLC2A1 SLC6A13 SLC12A1 SLC36A1 SLC12A6 SLC12A7 SLC2A13 SLC2A10 SLC16A10 SLC15A3 SLC6A1 SLC4A2 SLC4A1 SLC38A1 SLC38A5 SLC30A1 S…		hsa-miR-148a (0.001)
REACTOME_GPCR_LIGAND_BINDING	AGTR1 AGTR2 GNG2 GNG7 WNT10B GPER SSTR1 PTH2R NPY5R PENK AVPR1A HTR5A GIP C3 NPY2R C5 GNG13 GNG11 CCL28 CCL27 CCL23 CCL21 CCBP2 CCL19 NPY1R CCL16 P2RY12 P2RY14 GNG10 NMBR HTR2A CXCL12 GALR1 GPR44 RGR NTSR2 CCL2 ADORA2B DRD2 DRD5 CX3CL1 ADRA2A ADRA2C ADRA1B XCL2 RHO GPR109B GABBR1 CCRL1 PTGER2 PTGER3 PTGER4 ADRB2 ADRB1 CHRM3 GPR17 VIP CCK TAC1 OXTR PF4 ANXA1 FZD10 EDN3 EDN1 GPR120 GPBAR1 PPBP HTR7…		hsa-miR-25 (2.8e-10) hsa-miR-20a (1.2e-07) hsa-miR-145 (9.8e-07) hsa-miR-92b (1.1e-06) hsa-miR-92 (0.00019) hsa-miR-181a (0.00023) hsa-miR-130b (0.00044) hsa-miR-144 (0.0012) hsa-miR-586 (0.0013) hsa-miR-424 (0.0019) hsa-miR-323 (0.0025) hsa-miR-19a (0.0026) hsa-miR-367 (0.0066) hsa-miR-27a (0.0069)
REACTOME_P53_INDEPENDENT_DNA_DAMAGE_RESPONSE	CDC25A PSMD14 PSMD13 PSMD11 PSMA6 PSMA4 PSMA3 PSMA7 PSMB4 PSMB3 PSMB2 PSMC4 PSMC2 PSMD1 PSMD2 PSMD3 PSMD4 PSMD8 PSME1 PSME2 PSME3	*	hsa-miR-186 (1.8e-13) hsa-miR-802 (2.3e-13) hsa-miR-146b (2.4e-10) hsa-miR-146a (9.4e-09) hsa-miR-515-5p (0.00058) hsa-miR-765 (0.00072) hsa-miR-620 (0.00097) hsa-miR-555 (0.0029) hsa-miR-30d (0.0054) hsa-let-7c (0.0098)
REACTOME_NEP_NS2_INTERACTS_WITH_THE_CELLULAR_EXPORT_MACHINERY	RAE1 SEH1L NUP188 TPR NUP155 NUP205 NUP214 NUP210 XPO1 NUP85 NUP98 NUP93 NUP50 NUP62 NUPL1	*	hsa-miR-185 (1.2e-06) hsa-miR-514 (2.8e-05) hsa-miR-129-3p (0.00017) hsa-miR-125a (0.00033) hsa-miR-142-3p (0.0018) hsa-miR-186 (0.0052) hsa-miR-125b (0.0099)
REACTOME_NUCLEOTIDE_EXCISION_REPAIR	LIG1 RAD23B XAB2 DDB1 RPA3 ERCC3 ERCC4 ERCC1 ERCC2 PCNA GTF2H4 GTF2H3 POLE2 POLD4 POLD1 POLD2 CDK7 POLE RFC5 RFC3 RFC4 RFC2 POLR2H POLR2G POLR2K POLR2J POLR2I POLR2D		hsa-miR-496 (6.1e-06) hsa-miR-217 (0.00025) hsa-miR-302b (0.0023) hsa-miR-93 (0.0027)
REACTOME_METABOLISM_OF_LIPIDS_AND_LIPOPROTEINS	A2M SGMS2 EHHADH CH25H HSD11B1 HACL1 GPD1 ACACB HMGCS2 HSD3B1 ACSL1 HSD17B3 PHYH APOA4 SMARCD3 HADH ME1 ABCA1 ANGPTL4 FABP4 ACOX2 ACADM ACADS ACADL ACADVL GPAM CHD9 SLCO1A2 CYP4A11 SLCO1B1 STAR APOB LCAT CD36 ACAT1 IDH1 NR1H3 SCD ABCG5 SLC27A1 PPARA CYP39A1 AGPAT4 HSPG2 PPP1CC CAV1 ALB LPL UCP1 SGPP1 MGLL CYP11A1 PRKD1 SC5DL OXCT1 PPAP2A PPAP2B UGT2B4 LIPC SCP2 LIPE		hsa-miR-183 (8.6e-09) hsa-miR-33 (7.1e-08) hsa-miR-181b (2.8e-07) hsa-miR-218 (6.3e-07) hsa-miR-20a (1.9e-06) hsa-miR-130a (1.9e-06) hsa-miR-142-5p (1.2e-05) hsa-miR-25 (0.00021) hsa-miR-181c (0.00026) hsa-miR-145 (0.00028) hsa-miR-424 (0.00034) hsa-miR-181a (0.00082) hsa-miR-19b (0.00092) hsa-miR-19a (0.0029)
REACTOME_CRMPS_IN_SEMA3A_SIGNALING	FES DPYSL2 SEMA3A FYN		hsa-miR-145 (3.3e-17) hsa-miR-181c (7.6e-09) hsa-miR-181b (2.7e-07) hsa-miR-92 (2.3e-06) hsa-miR-32 (0.0025) hsa-miR-586 (0.004)
REACTOME_MRNA_SPLICING	CCAR1 PTBP1 DHX9 SF3B4 SF3B2 TXNL4A NCBP2 NCBP1 SNRPD3 SNRPD1 PRPF6 FUS LSM2 DDX23 SNRPA1 HNRNPU CPSF2 CPSF1 U2AF2 SFRS9 POLR2H POLR2G POLR2K POLR2J POLR2I POLR2D SF4 PAPOLA EFTUD2 SNRPB SNRPF SNRPE SNRPG CSTF3 CSTF2 RNPS1	*	hsa-miR-200a (8.3e-06) hsa-miR-302a (0.00011) hsa-miR-30b (0.00033) hsa-miR-1 (0.00039) hsa-miR-212 (0.00055) hsa-miR-331 (0.00057) hsa-miR-302b (0.00059) hsa-miR-206 (0.002) hsa-miR-194 (0.005) hsa-miR-125a (0.0056)
REACTOME_GLUCOSE_METABOLISM	PCK1 PC UGP2 GYG2 PGM1 PFKFB3 ALDOC PFKFB1 GYS2 GBE1 PHKB PYGM PYGL CALM1 PFKM		hsa-miR-19b (9.8e-13) hsa-miR-367 (4.1e-09) hsa-miR-92 (2e-06) hsa-miR-133a (4.5e-05) hsa-miR-25 (0.00062) hsa-miR-130b (0.0012) hsa-miR-32 (0.0018) hsa-miR-19a (0.0021) hsa-miR-770-5p (0.0027) hsa-miR-92b (0.0044)
REACTOME_MICRORNA_BIOGENESIS	XPO5 DICER1 TARBP2 POLR2H POLR2G POLR2K POLR2J POLR2I POLR2D	*	hsa-let-7b (6.8e-18) hsa-miR-125b (3.5e-08) hsa-miR-148b (1.3e-07) hsa-miR-122a (0.00012) hsa-miR-148a (0.00032) hsa-miR-152 (0.0038)
REACTOME_G_ALPHA_I_SIGNALLING_EVENTS	AGTR2 GNG2 GNG7 GPER SSTR1 GNAI1 NPY5R PENK GNAZ HTR5A C3 NPY2R C5 GNG13 GNG11 CCL28 CCL27 CCL23 CCL21 CCL19 NPY1R CCL16 P2RY12 P2RY14 GNG10 CXCL12 GALR1 GPR44 RGR DRD2 ADRA2A ADRA2C RHO GPR109B GABBR1 PTGER3 GPR17 PF4 ANXA1 ADCY3 ADCY4 ADCY8 ADCY5 ADCY6 PPBP POMC NPY CXCL1 OPN1LW CXCL3 CXCL2 CXCL6 CNR1 CXCR7		hsa-miR-335 (1.6e-29) hsa-miR-181c (1.3e-06) hsa-miR-19b (3.9e-06) hsa-miR-25 (5.8e-06) hsa-miR-142-5p (2.3e-05) hsa-miR-92b (6.1e-05) hsa-miR-375 (0.00012) hsa-miR-367 (0.00014) hsa-miR-181b (0.00014) hsa-miR-218 (0.00016) hsa-miR-101 (0.0015) hsa-miR-144 (0.0017) hsa-miR-135b (0.0017) hsa-miR-19a (0.0019) hsa-miR-485-3p (0.0078) hsa-miR-23b (0.0081)
REACTOME_BILE_SALT_AND_ORGANIC_ANION_SLC_TRANSPORTERS	SLC47A1 SLC47A2 SLC16A7		hsa-miR-29b (0.0068)
REACTOME_DOWNSTREAM_EVENTS_IN_GPCR_SIGNALING	AGTR1 AGTR2 GNG2 GNG7 ROCK1 GPER SSTR1 GNAI1 PTH2R NPY5R PENK AVPR1A GNAZ PDE11A HTR5A ARHGEF4 GIP ARHGEF6 ARHGEF17 C3 NPY2R C5 GNG13 GNG11 CCL28 CCL27 CCL23 DGKB CCL21 SOS1 PDE1A PLEKHG5 SOS2 CCL19 NPY1R DGKI CCL16 P2RY12 PDE2A P2RY14 GNG10 NMBR HTR2A PDE3B CXCL12 GALR1 GPR44 RGR PDE4C NTSR2 RASGRF2 ADORA2B DRD2 DRD5 ADRA2A ADRA2C PDE7B ADRA1B XCL2 RHO GPR109B GABBR1 RHOA PDE8B PDE8A PTGER2 PTGE…		hsa-miR-145 (2.3e-14) hsa-miR-335 (5.4e-06) hsa-miR-181c (1.1e-05) hsa-miR-19a (5e-05) hsa-miR-181a (0.00012) hsa-miR-27a (0.0017) hsa-miR-32 (0.0017) hsa-miR-25 (0.0023) hsa-miR-424 (0.0073) hsa-miR-144 (0.0073) hsa-miR-106a (0.0083) hsa-miR-92b (0.0085) hsa-miR-20a (0.0097)
REACTOME_ACTIVATION_OF_CHAPERONES_BY_IRE1_ALPHA	DNAJC3 DNAJB11 PDIA6 NFYA HSPA5		hsa-miR-30b (0.00029)
REACTOME_CD28_CO_STIMULATION	THEM4 PDPK1 GRB2 CD80 TRIB3 CDC42 SRC AKT1 PAK2 PAK1		hsa-miR-1 (0.00072) hsa-let-7b (0.0035)
REACTOME_CLASS_B2_SECRETIN_FAMILY_RECEPTORS	GNG2 GNG7 WNT10B PTH2R GIP GNG13 GNG11 GNG10 VIP FZD10 ADM FZD9 FZD8 FZD1 FZD5 FZD4 FZD7 PTCH1 VIPR2 SCTR PTHLH RAMP3 RAMP2 SMO WNT11 CALCR CRH		hsa-miR-145 (1.9e-09) hsa-miR-32 (0.00015) hsa-miR-20a (0.00067) hsa-miR-218 (0.0017) hsa-miR-144 (0.0025) hsa-miR-181c (0.0028) hsa-miR-367 (0.0052) hsa-miR-181a (0.0052)
REACTOME_REGULATION_OF_INSULIN_SECRETION	CACNB3 FH GNGT1 GNGT2 NDUFB11 NDUFB10 SDHC GNA15 NDUFAB1 CYC1 UQCRQ GCK MDH2 ALDOA IDH2 ATP5E KCNJ11 ATP5H ATP5J STX1A COX5A COX6C COX8A UQCRC1 PFKL GAPDH GNG5 NDUFA13 NDUFA11 GNB2 GNB1 GNAS GNB3 PRKAR2A IDH3G SLC2A1 ATP5J2 PRKAR1B NDUFV1 NDUFV2 CACNA1D NDUFS6 NDUFS8 NDUFS3 NDUFS2 ATP5G1 PFKFB4 PFKFB2 TPI1 COX6B1 COX6A1 ITPR3 PGK1 KCNS3 PLCB3 PLCB2 NDUFC2 NDUFC1 NDUFB4 NDUFB9 NDUFB1 NDUFB2 ENO2 N…		hsa-miR-185 (0.0015)
REACTOME_REGULATION_OF_RHEB_GTPASE_ACTIVITY_BY_AMPK	TSC1		hsa-miR-92 (0.00023) hsa-miR-32 (0.002)
REACTOME_G_PROTEIN_ACTIVATION	GNG2 GNG7 GNAI1 GNAZ GNG13 GNG11 POMC		hsa-miR-19b (2.3e-11) hsa-miR-19a (9.1e-09) hsa-miR-485-3p (5.7e-08) hsa-miR-218 (3.7e-06)
REACTOME_MTORC1_MEDIATED_SIGNALLING	RPS6 EIF4B		hsa-miR-145 (1e-05)
REACTOME_RESOLUTION_OF_AP_SITES_VIA_THE_SINGLE_NUCLEOTIDE_REPLACEMENT_PATHWAY	LIG3 NTHL1 OGG1 CCNO MPG XRCC1 TDG SMUG1 POLB	*	hsa-miR-1 (1.9e-09) hsa-miR-125a (0.00017) hsa-miR-30d (0.0081)
REACTOME_PROSTANOID_HORMONES	PTGS2 PTGIS		hsa-miR-101 (1.9e-06) hsa-miR-149 (7e-05)
REACTOME_INSULIN_SYNTHESIS_AND_SECRETION	RPL18 RPL14 RPL13 RPL15 RPLP2 RPL10 FAU RPL11 RPL12 RPS18 RPS17 RPS14 RPS15 RPS13 RPS11 GNAI1 RPS25 RPS27 RPS29 RPS21 RPS23 RPS24 RPS9 RPS6 RPS5 RPS8 RPS7 RPL41 RPL37 RPL32 RPL31 RPL34 SNAP25 RPL26 RPL27 RPL24 RPL29 RPL22 RPL21 RPS27A RPL35A VAMP2 RPL6 RPL9 RPL3 RPL5 RPL10A RPL7A RPL4 SEC11A RPL37A RPS3 RPS3A STXBP1 RPS4X RPS15A RPL13A SYT5 RPL27A CPE		hsa-miR-485-3p (6e-21) hsa-miR-218 (1.8e-19) hsa-miR-142-5p (1.7e-18) hsa-miR-92 (6.5e-17) hsa-miR-19a (9.7e-09) hsa-miR-376b (2.7e-08) hsa-miR-15b (6.7e-08) hsa-miR-130a (3.3e-07) hsa-miR-19b (1.2e-05) hsa-miR-137 (1.6e-05) hsa-miR-376a (0.00058) hsa-miR-21 (0.0016)
REACTOME_CELL_SURFACE_INTERACTIONS_AT_THE_VASCULAR_WALL	HRAS NRAS PPIL2 OLR1 F11R KRAS SLC16A3 MMP1 ITGAL GRB2 ITGAX FN1 SHC1 PIK3R2 COL1A1 TREM1 PTPN6		hsa-let-7f (0.0031) hsa-miR-217 (0.0096)
REACTOME_ASSOCIATION_OF_LICENSING_FACTORS_WITH_THE_PREREPLICATIVE_COMPLEX	E2F2 E2F3 ORC1L CDC6 ORC5L ORC2L CDT1		hsa-miR-148a (1.3e-11) hsa-miR-185 (4.5e-08) hsa-miR-194 (0.0022) hsa-miR-30b (0.0023) hsa-miR-34a (0.0051)
REACTOME_TAT_MEDIATED_HIV1_ELONGATION_ARREST_AND_RECOVERY	CTDP1 TH1L RDBP TCEB2 TCEB3 TCEB1 ELL POLR2H POLR2G POLR2K POLR2J POLR2I POLR2D	*	hsa-miR-30b (2.9e-06) hsa-miR-24 (0.00016) hsa-miR-9 (0.0077)
REACTOME_PURINE_RIBONUCLEOSIDE_MONOPHOSPHATE_BIOSYNTHESIS	ADSS GART IMPDH1 ATIC PPAT GMPS		hsa-miR-125b (0.0059)
REACTOME_GLUTAMATE_NEUROTRANSMITTER_RELEASE_CYCLE	SNAP25 VAMP2 SLC1A7 STXBP1 GLS SLC17A7		hsa-miR-181c (1.1e-07) hsa-miR-23b (2.6e-07) hsa-miR-218 (0.00028) hsa-miR-20a (0.00091)
REACTOME_HIV1_TRANSCRIPTION_INITIATION	TAF10 TAF13 TAF12 ERCC2 GTF2H4 GTF2H3 GTF2E1 TAF1 TAF4 TAF5 GTF2A1 CDK7 POLR2H POLR2G POLR2K POLR2J POLR2I POLR2D		hsa-miR-148a (1.3e-12) hsa-miR-496 (6.2e-10) hsa-miR-148b (2.5e-05) hsa-let-7f (0.00031) hsa-let-7b (0.0013) hsa-miR-128a (0.0022) hsa-miR-200a (0.0025) hsa-miR-132 (0.003) hsa-miR-320 (0.0059)
REACTOME_G_PROTEIN_BETA_GAMMA_SIGNALLING	GNGT1 GNGT2 PDPK1 PIK3R5 GNG5 GNB2 GNB1 GNB3 AKT1 PLCB3 PLCB2		hsa-let-7b (0.0003)
REACTOME_SIGNAL_ATTENUATION	IRS2 IRS1		hsa-miR-92 (9.1e-15) hsa-miR-145 (2.2e-11) hsa-miR-181c (5.2e-11) hsa-miR-183 (0.00017) hsa-miR-181b (0.00091)
REACTOME_TOLL_RECEPTOR_CASCADES	MAPK1 NFKBIB MAPKAPK3 MAPKAPK2 IKBKE IKBKG IKBKB MYD88 SIGIRR IRAK4 IRAK1 IRF7 IRF3 MAP2K7 MAP2K2 RPS6KA1 NFKB2 TIRAP ELK1		hsa-miR-132 (0.0001)
REACTOME_PROCESSING_OF_CAPPED_INTRON_CONTAINING_PRE_MRNA	RAE1 CCAR1 PTBP1 DHX9 SF3B4 SF3B2 TXNL4A NCBP2 NCBP1 SNRPD3 SNRPD1 PRPF6 FUS SEH1L NUP188 TPR NUP155 LSM2 NUP205 NUP214 NUP210 DDX23 SNRPA1 HNRNPU NUP85 CPSF2 CPSF1 NUP98 NUP93 U2AF2 SFRS9 NUP50 NUP62 POLR2H POLR2G POLR2K POLR2J POLR2I POLR2D SF4 CD2BP2 PAPOLA EFTUD2 NUPL1 SNRPB SNRPF SNRPE SNRPG CSTF3 CSTF2 RNPS1 CSTF1	*	hsa-miR-125a (1.4e-11) hsa-miR-30a-5p (9.6e-05) hsa-miR-155 (0.00012) hsa-miR-30b (0.00015) hsa-miR-302b (0.00016) hsa-miR-302a (0.0013) hsa-miR-125b (0.0034) hsa-miR-93 (0.006) hsa-miR-331 (0.0069) hsa-miR-129-3p (0.0073) hsa-miR-206 (0.0088)
REACTOME_METAL_ION_SLC_TRANSPORTERS	SLC41A2 SLC11A1 SLC31A1 SLC39A10 SLC39A7 SLC39A6 SLC39A4 SLC39A3 SLC39A1 SLC30A1 SLC30A8 SLC30A6 SLC30A7		hsa-miR-1 (1.6e-09) hsa-miR-217 (2e-06)
REACTOME_GLUCOSE_TRANSPORT	RAE1 GCK SEH1L NUP188 TPR NUP155 NUP205 HK1 NUP214 NUP210 HK3 SLC2A1 NUP85 NUP98 NUP93 NUP50 NUP62 NUPL1		hsa-miR-185 (3.4e-07) hsa-miR-514 (3.4e-06) hsa-miR-148b (6.9e-05) hsa-miR-125a (6.9e-05) hsa-miR-125b (0.00032) hsa-miR-148a (0.00047) hsa-miR-34a (0.0069)
REACTOME_TELOMERE_MAINTENANCE	LIG1 FEN1 HIST1H4K HIST1H4A HIST1H4B HIST1H4E HIST1H4F HIST1H4I HIST1H4J HIST1H4H H2BFS HIST3H2BB HIST3H3 RPA3 HIST2H2AA3 HIST1H2BO HIST1H2BM HIST1H2BN HIST1H2BK HIST1H2BL HIST1H2BI HIST1H2BJ PCNA HIST2H2AC HIST2H2BE RUVBL2 RUVBL1 HIST1H2AB HIST1H2AC HIST1H2AD HIST1H2AE POLA1 POLA2 HIST1H2BB HIST1H2BD HIST1H2BE HIST1H2BF HIST1H2BG HIST1H2BH HIST1H2AK POLE2 PRIM2 H2AFZ H2AFX POLE RFC4 RFC2	*	hsa-miR-802 (1.1e-35) hsa-miR-154 (1e-29) hsa-miR-1 (9e-28) hsa-miR-24 (4.8e-20) hsa-miR-610 (1e-12) hsa-miR-212 (7.2e-10) hsa-miR-217 (4e-08) hsa-miR-515-5p (5.7e-06) hsa-miR-9 (1e-05) hsa-miR-544 (0.00012) hsa-miR-659 (0.00073) hsa-miR-584 (0.0016)
REACTOME_SIGNALLING_TO_P38_VIA_RIT_AND_RIN	HRAS BRAF MAPK1 NRAS KRAS YWHAB MAP2K2		hsa-let-7f (9.2e-06) hsa-miR-28 (5.9e-05) hsa-miR-148b (0.00011) hsa-miR-217 (0.00052) hsa-let-7g (0.00062) hsa-miR-148a (0.0016) hsa-miR-30b (0.0017) hsa-let-7b (0.0055) hsa-miR-155 (0.0067)
REACTOME_CYTOSOLIC_SULFONATION_OF_SMALL_MOLECULES	SULT4A1 SULT1A1 SULT1A2 SULT1B1 SULT1E1 SULT1C4 SULT1C2 SULT2B1 SULT2A1		hsa-miR-101 (0.0015)
REACTOME_NOTCH_HLH_TRANSCRIPTION_PATHWAY	MAML3 MAML2 NOTCH2 NOTCH4 RBPJ SNW1		hsa-miR-21 (0.0014) hsa-miR-34c (0.0022)
REACTOME_RHO_GTPASE_CYCLE	HMHA1 RAC2 RAC3 RAC1 ARHGEF18 ARHGEF16 ARHGEF11 FGD3 ARHGDIA PREX1 BCR MYO9B MCF2L GDI1 RHOBTB1 G3BP2 ARHGAP30 PIK3R2 SYDE2 ARHGAP11A ARHGEF2 RASGRF1 VAV3 VAV2 CDC42 RHOC RHOD RHOF RHOG INPP5B DEPDC1B DEPDC7 DEPDC1 TRIO GMIP RHOT2 ECT2 RACGAP1 GRLF1		hsa-miR-186 (0.0047) hsa-miR-185 (0.0066)
REACTOME_STEROID_HORMONES	HSD11B1 GC CYP17A1 HSD3B1 HSD17B3 LRP2 CUBN CYP24A1 STAR LGMN STARD6 CYP19A1 CYP11B1 CYP11A1		hsa-miR-19a (0.0007) hsa-miR-101 (0.0013) hsa-miR-19b (0.0081)
REACTOME_NUCLEAR_IMPORT_OF_REV_PROTEIN	RAE1 SEH1L NUP188 TPR NUP155 NUP205 NUP214 NUP210 NUP85 NUP98 NUP93 NUP50 NUP62 NUPL1 KPNB1	*	hsa-miR-185 (3.3e-12) hsa-miR-148b (3.1e-11) hsa-miR-125a (3.4e-10) hsa-miR-125b (9.3e-07) hsa-miR-148a (1.3e-05) hsa-miR-129-3p (0.00078) hsa-miR-514 (0.0021)
REACTOME_REGULATION_OF_GLUCOKINASE_BY_GLUCOKINASE_REGULATORY_PROTEIN	RAE1 GCK SEH1L NUP188 TPR NUP155 NUP205 NUP214 NUP210 NUP85 NUP98 NUP93 NUP50 NUP62 NUPL1	*	hsa-miR-185 (8.9e-10) hsa-miR-129-3p (5.8e-07) hsa-miR-125a (2.2e-05) hsa-miR-514 (0.0015)
REACTOME_HOST_INTERACTIONS_OF_HIV_FACTORS	RAE1 RAC1 ARF1 AP2S1 AP2M1 BANF1 AP2B1 SEH1L AP2A2 PACS1 PPIA NUP188 RANBP1 TPR NUP155 RANGAP1 AP1S3 AP1S1 NUP205 NUP214 NUP210 TCEB2 TCEB1 XPO1 AP1G1 BTRC DOCK2 ATP6V1H NUP85 AP1M1 NUP98 AP1M2 NUP93 HCK NUP50 NUP62 AP1B1 PSMD14 PSMD13 PSMD12 PSMD11 NUPL1 PSMA6 PSMA4 PSMA3 PSMA7 PSMB4 PSMB3 PSMB2 PSMC4 PSMC3 PSMC2 PAK2 PSMD1 PSMD2 PSMD3 PSMD4 KPNB1 PSMD8 PSME1 PSME2 PSME3 KPNA1 PSMB10	*	hsa-miR-186 (6.4e-33) hsa-miR-802 (1.8e-20) hsa-miR-148a (4.1e-14) hsa-miR-152 (1.4e-12) hsa-miR-34a (1.4e-09) hsa-miR-146b (7.5e-08) hsa-miR-132 (1.3e-06) hsa-miR-328 (5.7e-06) hsa-miR-93 (8.1e-06) hsa-miR-155 (1.2e-05) hsa-miR-30b (0.00011) hsa-miR-148b (0.00021) hsa-let-7e (0.00076) hsa-miR-620 (0.0013) hsa-miR-30c (0.002) hsa-let-7f (0.0021) hsa-miR-125b (0.0026) hsa-miR-146a (0.0029) hsa-miR…
REACTOME_MEMBRANE_TRAFFICKING	ARF1 TFRC VAMP8 ARFGAP1 DNASE2 GAK TPD52 RAB5C PREB COPA CLTC COPG COPE TGOLN2 AP1S3 COPB2 AP1S1 COPB1 STX4 DNM2 AP1G1 SEC13 SEC24C SEC24D M6PR IGF2R AP1M1 AP1M2 AP1B1 AP3B1 COPZ1 NAPA CTSZ	*	hsa-miR-148a (1.6e-17) hsa-miR-152 (2e-16) hsa-miR-320 (2.2e-07) hsa-miR-185 (5.7e-07) hsa-miR-299-3p (8.5e-05) hsa-miR-204 (0.00011) hsa-miR-125b (0.0002) hsa-miR-9 (0.00059) hsa-miR-30c (0.00079) hsa-miR-138 (0.0016) hsa-miR-98 (0.0036) hsa-miR-194 (0.0059)
REACTOME_CLASS_A1_RHODOPSIN_LIKE_RECEPTORS	AGTR1 AGTR2 GPER SSTR1 NPY5R PENK AVPR1A HTR5A C3 NPY2R C5 CCL28 CCL27 CCL23 CCL21 CCBP2 CCL19 NPY1R CCL16 P2RY12 P2RY14 NMBR HTR2A CXCL12 GALR1 GPR44 RGR NTSR2 CCL2 ADORA2B DRD2 DRD5 CX3CL1 ADRA2A ADRA2C ADRA1B XCL2 RHO GPR109B CCRL1 PTGER2 PTGER3 PTGER4 ADRB2 ADRB1 CHRM3 GPR17 CCK TAC1 OXTR PF4 ANXA1 EDN3 EDN1 GPR120 GPBAR1 PPBP HTR7 CX3CR1 PRLHR POMC NPY EDNRB PROK2 PROK1 PTGDR CXCL1 AVPR2 OPN…		hsa-miR-367 (2.4e-29) hsa-miR-218 (8.1e-24) hsa-miR-145 (3.6e-22) hsa-miR-23b (1.2e-10) hsa-miR-181c (2.1e-10) hsa-miR-181a (2.3e-09) hsa-miR-32 (3.2e-09) hsa-miR-23a (1.9e-08) hsa-miR-375 (1.8e-06) hsa-miR-25 (8.9e-05) hsa-miR-142-5p (0.00011) hsa-miR-19a (0.00038) hsa-miR-323 (0.00046) hsa-miR-33 (0.00068) hsa-miR-424 (0.0023) hsa-miR-16 (0.0062) hsa-miR-92 (0.007)
REACTOME_PLC_GAMMA1_SIGNALLING	PDE1C PDE1A PRKAR2B ADCY3 ADCY4 ADCY8 ITPR1 ITPR2 CALM1		hsa-miR-19b (8.3e-12) hsa-miR-92 (8e-11) hsa-miR-770-5p (5.3e-05) hsa-miR-32 (0.00026) hsa-miR-19a (0.00039) hsa-miR-218 (0.00041) hsa-miR-92b (0.0013) hsa-miR-335 (0.0069) hsa-miR-25 (0.009)
REACTOME_G1_S_TRANSITION	DBF4 TFDP1 E2F2 E2F3 FBXO5 RPA3 TYMS ORC1L PCNA CCNE2 CCNE1 CDC7 CDC6 RRM2 POLA1 POLA2 CCNB1 POLE2 ORC6L CDK7 ORC5L ORC2L CDC25A PRIM2 POLE CDT1 PSMD14 PSMD13 PSMD11 MCM10 PSMA6 PSMA4 PSMA3 PSMA7 PSMB4 PSMB3 PSMB2 PSMC4 PSMC2 MCM8 PSMD1 PSMD2 PSMD3 PSMD4 PSMD8 MCM2 MCM3 MCM4 MCM6 PSME1 PSME2 PSME3	*	hsa-miR-30b (6.1e-25) hsa-miR-148a (1.9e-22) hsa-miR-146b (2.7e-22) hsa-miR-515-5p (6.1e-16) hsa-miR-152 (9.9e-13) hsa-miR-802 (6.8e-12) hsa-miR-186 (3.8e-11) hsa-miR-496 (9e-09) hsa-miR-767-3p (1.9e-08) hsa-miR-328 (7.5e-08) hsa-miR-146a (5.2e-07) hsa-miR-200a (1.9e-06) hsa-miR-34a (5.7e-06) hsa-let-7i (1.2e-05) hsa-miR-555 (1.3e-05) hsa-miR-125a (8e-05) hsa-miR-503 (0.00078) hsa-miR-125b (0.001…
REACTOME_SIGNALING_BY_NOTCH	FURIN PSENEN APH1A PSEN1 PSEN2		hsa-miR-185 (0.00033)
REACTOME_SIGNALLING_TO_RAS	HRAS MAPK1 NRAS RALA MAPKAPK3 MAPKAPK2 KRAS YWHAB GRB2 SHC1 MAP2K2 MAPK12 MAPK13 SRC		hsa-let-7f (3.4e-15) hsa-miR-217 (2.5e-14) hsa-miR-148a (1.1e-13) hsa-miR-148b (6.3e-11) hsa-miR-30b (0.00064) hsa-miR-30e-5p (0.0062)
REACTOME_REPAIR_SYNTHESIS_OF_PATCH_27_30_BASES_LONG_BY_DNA_POLYMERASE	RPA3 PCNA POLE2 POLD4 POLD1 POLD2 POLE RFC5 RFC3 RFC4 RFC2		hsa-miR-154 (4.6e-05) hsa-miR-134 (0.0052) hsa-miR-217 (0.0097)
REACTOME_S_PHASE	LIG1 FEN1 RPA3 CCNA2 ORC1L PCNA CCNE2 CCNE1 CDC6 CCND1 POLA1 POLA2 POLE2 ORC6L GINS1 GINS2 GINS4 POLD4 POLD1 POLD2 CDK7 CDK2 ORC5L ORC2L CDC25A CDC25B PRIM2 POLE RFC5 RFC3 RFC4 RFC2 CDT1 PSMD14 PSMD13 PSMD12 PSMD11 PSMA6 PSMA4 PSMA3 FZR1 PSMA7 PSMB4 PSMB3 PSMB2 PSMC4 PSMC3 PSMC2 MCM8 PSMD1 PSMD2 PSMD3 PSMD4 PSMD8 MCM2 MCM3 MCM4 MCM5 MCM6 PSME1 PSME2 PSME3 PSMB10	*	hsa-miR-30b (4.5e-47) hsa-miR-148a (4e-43) hsa-miR-186 (1.4e-25) hsa-miR-802 (4.7e-25) hsa-miR-146b (2.7e-19) hsa-miR-152 (8.9e-16) hsa-miR-148b (1.7e-12) hsa-let-7a (8.8e-11) hsa-let-7f (1e-08) hsa-miR-555 (3e-08) hsa-miR-30e-3p (1.1e-07) hsa-miR-146a (2.7e-05) hsa-miR-765 (4.4e-05) hsa-miR-328 (5.7e-05) hsa-miR-767-3p (6.5e-05) hsa-miR-93 (8.3e-05) hsa-miR-132 (0.00011) hsa-miR-30c (0.0011) hsa…
REACTOME_OTHER_SEMAPHORIN_INTERACTIONS	SEMA5A SEMA6A SEMA6D		hsa-miR-145 (9.7e-19) hsa-miR-15b (2.3e-09) hsa-miR-19b (2.4e-09) hsa-miR-23b (3e-08) hsa-miR-375 (3.4e-05) hsa-miR-218 (3.9e-05) hsa-miR-19a (0.0001) hsa-miR-183 (0.0077)
REACTOME_E2F_TRANSCRIPTIONAL_TARGETS_AT_G1_S	TFDP1 E2F2 E2F3 FBXO5 TYMS ORC1L PCNA CCNE1 CDC6 RRM2 POLA1 CDC25A CDT1	*	hsa-miR-1 (9.1e-16) hsa-miR-148a (4.4e-15) hsa-miR-30d (3.1e-07) hsa-miR-152 (2.3e-05) hsa-let-7i (3.9e-05) hsa-miR-30b (9.5e-05) hsa-let-7b (0.0012) hsa-miR-342 (0.0022) hsa-let-7f (0.0037) hsa-let-7e (0.0051)
REACTOME_CDC20_PHOSPHO_APC_MEDIATED_DEGRADATION_OF_CYCLIN_A	ANAPC2 ANAPC7 UBE2C BUB3 MAD2L1 CDC20 PSMD14 PSMD13 PSMD11 PSMA6 PSMA4 PSMA3 ANAPC11 PSMA7 PSMB4 PSMB3 PSMB2 PSMC4 PSMC2 PSMD1 PSMD2 PSMD3 PSMD4 PSMD8 PSME1 PSME2 BUB1B PSME3	*	hsa-miR-186 (1.5e-14) hsa-miR-146a (1.5e-09) hsa-miR-802 (2.6e-08) hsa-miR-146b (1.9e-05) hsa-miR-620 (0.0003) hsa-miR-555 (0.00041) hsa-miR-515-5p (0.0016) hsa-miR-765 (0.0084)
REACTOME_GRB2_EVENTS_IN_EGFR_SIGNALING	HRAS MAPK1 NRAS KRAS YWHAB GRB2 MAP2K2		hsa-miR-30b (1.1e-18) hsa-miR-148a (2e-06) hsa-miR-152 (2.2e-05) hsa-miR-148b (0.00048) hsa-let-7f (0.0015) hsa-miR-217 (0.0054) hsa-miR-132 (0.0088) hsa-miR-28 (0.0096)
REACTOME_TRANSCRIPTION_OF_THE_HIV_GENOME	TAF10 TAF13 TAF12 SSRP1 NCBP2 NCBP1 SUPT16H CTDP1 TH1L ERCC3 ERCC2 RDBP GTF2H4 GTF2H3 SUPT4H1 TCEB2 TCEB3 TCEB1 RNMT GTF2E1 TAF1 TAF4 TAF5 WHSC2 GTF2A1 CDK7 ELL RNGTT POLR2H POLR2G POLR2K POLR2J POLR2I POLR2D	*	hsa-miR-496 (6.6e-18) hsa-miR-9 (4.2e-11) hsa-miR-132 (1.1e-10) hsa-miR-148b (4e-09) hsa-miR-204 (6.2e-08) hsa-miR-302b (6.6e-06) hsa-miR-320 (1.6e-05) hsa-let-7f (4.9e-05) hsa-miR-299-3p (0.00041) hsa-miR-302c (0.00041) hsa-miR-152 (0.00051) hsa-miR-148a (0.0006) hsa-miR-302a (0.0019) hsa-let-7b (0.0035) hsa-miR-30b (0.0036) hsa-miR-34a (0.0042) hsa-miR-24 (0.0043)
REACTOME_TRANSCRIPTION	TAF10 TAF13 TAF12 SSRP1 NCBP2 NCBP1 HIST1H4L HIST1H4K HIST1H4A HIST1H4B HIST1H4E HIST1H4F HIST1H4C HIST1H4D HIST1H4I HIST1H4J HIST1H4H HIST1H3J EHMT2 HIST1H3A HIST1H3B HIST1H3E HIST1H3F HIST1H3G HIST1H3H HIST1H3I GTF3C5 GTF3C2 GTF3C1 GTF3C4 POLRMT SUPT16H H2BFS HIST3H2BB CTDP1 UBTF TH1L ERCC2 HIST2H2AA3 HIST1H2BO HIST1H2BM HIST1H2BN HIST1H2BK HIST1H2BL HIST1H2BI HIST1H2BJ RDBP H3F3A RRN3 HIST2H2A…	*	hsa-miR-132 (5.5e-40) hsa-miR-496 (3.8e-29) hsa-miR-148a (1.2e-15) hsa-miR-152 (4.1e-14) hsa-miR-802 (7.7e-10) hsa-miR-133a (5.3e-06) hsa-miR-125b (9.8e-06) hsa-miR-1 (6.2e-05) hsa-miR-34a (8.4e-05) hsa-miR-30c (0.00029) hsa-let-7f (0.00064) hsa-miR-328 (0.00093) hsa-miR-204 (0.0017) hsa-miR-153 (0.003) hsa-miR-125a (0.0085) hsa-miR-372 (0.009)
REACTOME_DOWN_STREAM_SIGNAL_TRANSDUCTION	HRAS MAPK1 NRAS KRAS YWHAB PDGFB GRB2 PIK3R2 MAP2K2 STAT1 STAT3 SRC		hsa-miR-132 (4.2e-05) hsa-miR-152 (0.0017) hsa-miR-217 (0.0057)
REACTOME_REGULATION_OF_INSULIN_SECRETION_BY_ACETYLCHOLINE	GNAI1 SNAP25 VAMP2 STXBP1 CHRM3 ITPR1 ITPR2 PLCB1 PRKCA		hsa-miR-130a (1.4e-18) hsa-miR-25 (1e-14) hsa-miR-218 (1.2e-10) hsa-miR-92 (1.6e-10) hsa-miR-19a (2.8e-05) hsa-miR-19b (3.9e-05) hsa-miR-183 (7.1e-05) hsa-miR-15b (0.00088) hsa-miR-153 (0.0013) hsa-miR-301 (0.0018)
REACTOME_ORC1_REMOVAL_FROM_CHROMATIN	CCNA2 ORC1L CDC6 ORC6L CDK2 ORC5L ORC2L CDT1 PSMD14 PSMD13 PSMD12 PSMD11 PSMA6 PSMA5 PSMA4 PSMA3 FZR1 PSMA7 PSMB4 PSMB3 PSMB2 PSMC4 PSMC3 PSMC2 MCM8 PSMD1 PSMD2 PSMD3 PSMD4 PSMD8 MCM2 MCM3 MCM4 MCM5 MCM6 PSME1 PSME2 PSME3 PSMB10	*	hsa-miR-802 (1.5e-41) hsa-miR-555 (1.3e-13) hsa-miR-30b (8.1e-13) hsa-miR-146b (1.4e-12) hsa-miR-186 (4.2e-10) hsa-miR-185 (1.2e-06) hsa-miR-146a (1e-05) hsa-miR-620 (4.4e-05) hsa-miR-515-5p (4.7e-05) hsa-miR-643 (0.00061) hsa-miR-767-3p (0.00066) hsa-miR-132 (0.00079) hsa-miR-302c (0.0037) hsa-miR-765 (0.0098) hsa-miR-302b (0.0099)
REACTOME_LATE_PHASE_OF_HIV_LIFE_CYCLE	RAE1 TAF10 TAF13 TAF12 SSRP1 NCBP2 NCBP1 SUPT16H SEH1L CTDP1 TH1L NUP188 RANBP1 TPR ERCC2 NUP155 RANGAP1 RDBP GTF2H4 GTF2H3 NUP205 NUP214 NUP210 TCEB2 TCEB3 TCEB1 XPO1 RNMT GTF2E1 TAF1 TAF4 TAF5 WHSC2 GTF2A1 NUP85 CDK7 NUP98 NUP93 ELL NUP50 NUP62 RNGTT POLR2H POLR2G POLR2K POLR2J POLR2I POLR2D NUPL1	*	hsa-miR-496 (4.1e-16) hsa-miR-185 (1.2e-14) hsa-let-7f (9.3e-09) hsa-let-7g (1.3e-08) hsa-miR-148a (7.7e-08) hsa-miR-132 (3.5e-05) hsa-miR-200a (8.7e-05) hsa-miR-152 (9.8e-05) hsa-miR-30d (0.00013) hsa-miR-125b (0.0002) hsa-miR-299-3p (0.00022) hsa-let-7b (0.00055) hsa-miR-320 (0.00059) hsa-miR-133a (0.00081) hsa-miR-128a (0.0015) hsa-miR-93 (0.0026) hsa-miR-30e-5p (0.0033) hsa-miR-206 (0.0034) h…
REACTOME_INTRINSIC_PATHWAY_FOR_APOPTOSIS	BCL2L1 TFDP1 CASP3 BAD BID YWHAB PMAIP1 BMF DIABLO BAK1 BBC3 AKT1		hsa-miR-30b (3.5e-08) hsa-miR-148a (1.3e-07) hsa-miR-148b (1.2e-06) hsa-miR-125b (0.0002)
REACTOME_REGULATION_OF_INSULIN_SECRETION_BY_FREE_FATTY_ACIDS	GNAI1 SNAP25 VAMP2 STXBP1 ITPR1 ITPR2 PLCB1		hsa-miR-130a (1.8e-11) hsa-miR-15b (1e-09) hsa-miR-218 (2.2e-07) hsa-miR-19b (9.6e-06) hsa-miR-92 (0.00012) hsa-miR-19a (0.00021) hsa-miR-367 (0.00089) hsa-miR-301 (0.0019) hsa-miR-424 (0.0032) hsa-miR-103 (0.0044) hsa-miR-25 (0.0061) hsa-miR-32 (0.0079)
REACTOME_G1_PHASE	TFDP1 E2F2 E2F3 E2F5 CCND1 CDK7		hsa-miR-1 (0.00031) hsa-miR-496 (0.0071)
REACTOME_FRS2MEDIATED_CASCADE	FGF7 FGF9 FGF1 FGF2 KL FGF10 FGFR2 FGFR1		hsa-miR-218 (1.3e-12) hsa-miR-183 (4.1e-06) hsa-miR-543 (0.00024) hsa-miR-214 (0.0029) hsa-miR-103 (0.003)
REACTOME_SNRNP_ASSEMBLY	RAE1 NCBP2 NCBP1 SNRPD3 SNRPD1 SEH1L NUP188 TPR GEMIN6 GEMIN7 GEMIN5 NUP155 WDR77 NUP205 NUP214 NUP210 NUP85 NUP98 NUP93 CLNS1A NUP50 NUP62 NUPL1 SNRPB SNRPF SNRPE SNRPG	*	hsa-miR-125a (5.8e-21) hsa-miR-129-3p (3.7e-16) hsa-miR-185 (1.1e-10) hsa-miR-514 (2.3e-09) hsa-miR-205 (3.3e-07) hsa-miR-125b (0.003) hsa-miR-568 (0.0084)
REACTOME_DUAL_INCISION_REACTION_IN_TC_NER	XAB2 ERCC3 ERCC4 ERCC1 ERCC2 GTF2H4 GTF2H3 CDK7 POLR2H POLR2G POLR2K POLR2J POLR2I POLR2D		hsa-miR-496 (8.6e-06)
REACTOME_E2F_ENABLED_INHIBITION_OF_PRE_REPLICATION_COMPLEX_FORMATION	ORC1L CCNB1 ORC6L ORC5L ORC2L CDC25A MCM8	*	hsa-miR-185 (1.2e-13) hsa-miR-30b (1.1e-11) hsa-let-7f (0.0015) hsa-miR-30c (0.0041) hsa-let-7b (0.0064)
REACTOME_G_ALPHA_Z_SIGNALLING_EVENTS	GNAI1 GNAZ ADCY3 ADCY4 ADCY8 ADCY5 ADCY6		hsa-miR-19b (3.6e-08) hsa-miR-335 (1.3e-07) hsa-miR-19a (0.00017) hsa-miR-485-3p (0.00039) hsa-miR-25 (0.00061) hsa-miR-218 (0.0014) hsa-miR-92b (0.0016)
REACTOME_ACETYLCHOLINE_NEUROTRANSMITTER_RELEASE_CYCLE	SNAP25 VAMP2 STXBP1		hsa-miR-150 (0.0083)
REACTOME_LAGGING_STRAND_SYNTHESIS	LIG1 FEN1 RPA3 PCNA POLA1 POLA2 POLD4 POLD1 POLD2 PRIM2 RFC5 RFC3 RFC4 RFC2	*	hsa-miR-154 (7.1e-15) hsa-miR-1 (1.2e-10) hsa-miR-610 (4.7e-05) hsa-miR-134 (8.4e-05) hsa-miR-515-5p (0.0083)
REACTOME_RNA_POLYMERASE_I_PROMOTER_CLEARANCE	HIST1H4K HIST1H4A HIST1H4B HIST1H4E HIST1H4F HIST1H4I HIST1H4J HIST1H4H HIST1H3J HIST1H3A HIST1H3B HIST1H3E HIST1H3F HIST1H3G HIST1H3H HIST1H3I H2BFS HIST3H2BB UBTF HIST2H2AA3 HIST1H2BO HIST1H2BM HIST1H2BN HIST1H2BK HIST1H2BL HIST1H2BI HIST1H2BJ H3F3A HIST2H2AC GTF2H3 HIST2H2BE HIST1H2AB HIST1H2AC HIST1H2AD HIST1H2AE HIST1H2BB HIST1H2BD HIST1H2BE HIST1H2BF HIST1H2BG HIST1H2BH HIST1H2AK CDK7 H2AFZ…	*	hsa-miR-496 (1.6e-107) hsa-miR-802 (9.3e-28) hsa-miR-24 (1.7e-11) hsa-miR-328 (1.2e-05) hsa-miR-584 (9.2e-05) hsa-miR-132 (0.00011) hsa-miR-659 (0.0013) hsa-miR-155 (0.0017)
REACTOME_HEMOSTASIS	A2M GNG2 GNG7 F8 SERPING1 SIRPA F3 TFPI GNAI1 KLKB1 GAS6 ANGPT1 GNG13 GNG11 SELP IGF1 P2RY12 TEK ADRA2A ADRA2C P2RX1 MERTK SLC7A10 JAM2 JAM3 PF4 FIGF ATP1B2 APOB RAPGEF3 CFD F10 VEGFC CD36 PLAT PLA2G4A TF ITPR1 ITPR2 FYN CALM1 PDGFA MMRN1 TTN CAV1 CLU ITGB1 ALB PLCG2 RAP1A MGLL PRKCA PROS1 RASGRP2 SCG3 PIK3R1		hsa-miR-92 (1.1e-13) hsa-miR-149 (1.6e-05) hsa-miR-19b (1.6e-05) hsa-miR-32 (3.7e-05) hsa-miR-218 (5.6e-05) hsa-miR-424 (0.00012) hsa-miR-485-3p (0.00023) hsa-miR-142-5p (0.00025) hsa-miR-367 (0.0005) hsa-miR-20b (0.003) hsa-miR-144 (0.0047) hsa-miR-770-5p (0.0072)
REACTOME_INTEGRIN_ALPHAIIBBETA3_SIGNALING	APBB1IP SOS1 FGA RAPGEF3 RAP1A RAP1B TLN1 RASGRP2 VWF		hsa-miR-19b (3.9e-06) hsa-miR-92 (0.00016) hsa-miR-149 (0.00032) hsa-miR-181c (0.0012) hsa-miR-19a (0.0013) hsa-miR-367 (0.0015) hsa-miR-144 (0.0019)
REACTOME_RNA_POLYMERASE_I_PROMOTER_OPENING	HIST1H4K HIST1H4A HIST1H4B HIST1H4E HIST1H4F HIST1H4I HIST1H4J HIST1H4H HIST1H3J HIST1H3A HIST1H3B HIST1H3E HIST1H3F HIST1H3G HIST1H3H HIST1H3I H2BFS HIST3H2BB UBTF HIST2H2AA3 HIST1H2BO HIST1H2BM HIST1H2BN HIST1H2BK HIST1H2BL HIST1H2BI HIST1H2BJ H3F3A HIST2H2AC HIST2H2BE HIST1H2AB HIST1H2AC HIST1H2AD HIST1H2AE HIST1H2BB HIST1H2BD HIST1H2BE HIST1H2BF HIST1H2BG HIST1H2BH HIST1H2AK H2AFZ H2AFX	*	hsa-miR-24 (1.3e-38) hsa-miR-802 (6.7e-36) hsa-miR-9 (8.9e-09) hsa-miR-544 (1.7e-05) hsa-miR-155 (0.00011) hsa-miR-659 (0.00047) hsa-miR-212 (0.00053) hsa-miR-328 (0.0043) hsa-miR-584 (0.0085)
REACTOME_VIF_MEDIATED_DEGRADATION_OF_APOBEC3G	TCEB2 TCEB1 PSMD14 PSMD13 PSMD11 PSMA6 PSMA4 PSMA3 PSMA7 PSMB4 PSMB3 PSMB2 PSMC4 PSMC2 PSMD1 PSMD2 PSMD3 PSMD4 PSMD8 PSME1 PSME2 PSME3	*	hsa-miR-186 (4.4e-28) hsa-miR-802 (1e-22) hsa-miR-146b (1.5e-10) hsa-miR-146a (4.2e-09) hsa-miR-132 (0.00023) hsa-miR-515-5p (0.00026) hsa-miR-30b (0.00057) hsa-miR-765 (0.00072) hsa-miR-555 (0.0023)
REACTOME_SOS_MEDIATED_SIGNALLING	HRAS MAPK1 NRAS KRAS YWHAB GRB2 MAP2K2		hsa-miR-148a (0.00059) hsa-miR-148b (0.0054)
REACTOME_EICOSANOID_LIGAND_BINDING_RECEPTORS	GPR44 PTGER2 PTGER3 PTGER4 GPR17 PTGDR PTGFR		hsa-miR-23b (5.2e-14) hsa-miR-25 (1.8e-10) hsa-miR-92 (1.7e-09) hsa-miR-145 (3.8e-09) hsa-miR-367 (2.4e-08) hsa-miR-32 (0.0027)
REACTOME_TRANSCRIPTION_COUPLED_NER	LIG1 XAB2 RPA3 ERCC4 ERCC1 ERCC2 PCNA GTF2H4 GTF2H3 POLE2 POLD4 POLD1 POLD2 CDK7 POLE RFC5 RFC3 RFC4 RFC2 POLR2H POLR2G POLR2K POLR2J POLR2I POLR2D	*	hsa-miR-154 (5.6e-12) hsa-miR-496 (6.5e-07) hsa-miR-217 (9.3e-06)
REACTOME_ACTIVATION_OF_ATR_IN_RESPONSE_TO_REPLICATION_STRESS	RAD1 DBF4 HUS1 CLSPN ATRIP RPA3 ORC1L CDC7 CDC6 ORC6L CDK2 ORC5L ORC2L CDC25C CDC25A RFC5 RFC3 RFC4 RFC2 CHEK1 MCM10 MCM8 MCM2 MCM3 MCM4 MCM5 MCM6	*	hsa-miR-30c (1.5e-12) hsa-miR-128b (2.6e-07) hsa-miR-30b (2.8e-07) hsa-miR-185 (8.7e-07) hsa-let-7f (2.7e-05) hsa-miR-34a (0.00019) hsa-miR-302a (0.0026) hsa-let-7b (0.0041) hsa-let-7e (0.0049) hsa-miR-643 (0.0065) hsa-miR-302c (0.0095)
REACTOME_REGULATION_OF_BETA_CELL_DEVELOPMENT	RPL18 RPL14 RPL13 RPL15 RPLP2 RPL10 FAU RPL11 RPL12 HNF4G RPS18 HNF4A RPS17 RPS14 RPS15 RPS13 RPS10 RPS11 RPS25 RPS27 RPS29 RPS21 RPS23 RPS24 RPS9 RPS6 RPS5 RPS8 RPS7 HNF1B HNF1A PTF1A RPL41 RPL35 RPL37 RPL38 RPL30 RPL32 RPL31 RPL34 RPL26 RPL27 RPL24 RPL29 RPL23 RPL22 RPL21 NR5A2 SLC2A2 RPS27A RPL35A RPL6 RPL9 RPL3 RPL5 RPL10A RPL7A RPL4 RPL37A PAX6 PAX4 RPS3 RPS3A RPS4X PKLR RPS15A RPL13A RBPJ R…	*	hsa-miR-142-5p (1e-61) hsa-miR-376a (4e-39) hsa-miR-181c (1.3e-38) hsa-miR-376b (9.6e-35) hsa-miR-218 (4.5e-29) hsa-miR-23b (8.6e-25) hsa-miR-144 (4.9e-19) hsa-miR-137 (8e-14) hsa-miR-101 (1.4e-10) hsa-miR-21 (3.8e-10) hsa-miR-150 (2.4e-07) hsa-miR-20a (7.5e-06) hsa-miR-365 (4.2e-05) hsa-miR-181a (0.0001) hsa-miR-557 (0.0002) hsa-miR-15b (0.00084) hsa-miR-181b (0.0076) hsa-miR-375 (0.0092)
REACTOME_HORMONE_SENSITIVE_LIPASE_HSL_MEDIATED_TRIACYLGLYCEROL_HYDROLYSIS	FABP4 PPP1CC CAV1 MGLL LIPE		hsa-miR-218 (8.3e-18) hsa-miR-142-5p (4.7e-09) hsa-miR-32 (7.1e-07) hsa-miR-106b (1.1e-06) hsa-miR-92 (2.2e-05) hsa-miR-137 (0.0018) hsa-miR-20a (0.0023)
REACTOME_MRNA_DECAY_BY_5_TO_3_EXORIBONUCLEASE	EDC4 EDC3 DDX6 LSM5 LSM4 LSM2 LSM1 XRN1 DCP2		hsa-miR-30b (0.0053) hsa-miR-9 (0.0091)
REACTOME_CDT1_ASSOCIATION_WITH_THE_CDC6_ORC_ORIGIN_COMPLEX	ORC1L CDC6 ORC6L ORC5L ORC2L CDT1 PSMD14 PSMD13 PSMD11 PSMA6 PSMA4 PSMA3 PSMA7 PSMB4 PSMB3 PSMB2 PSMC4 PSMC2 MCM8 PSMD1 PSMD2 PSMD3 PSMD4 PSMD8 PSME1 PSME2 PSME3	*	hsa-miR-186 (1.1e-16) hsa-miR-802 (1.7e-16) hsa-miR-185 (6.6e-09) hsa-miR-146b (8.7e-08) hsa-miR-620 (8.8e-08) hsa-miR-146a (0.00022) hsa-miR-643 (0.00041) hsa-miR-767-3p (0.00044) hsa-miR-555 (0.0032)
REACTOME_NUCLEAR_EVENTS_KINASE_AND_TRANSCRIPTION_FACTOR_ACTIVATION	MEF2C MEF2A PPP2CB RPS6KA5 RPS6KA3 DUSP6 ATF1 PPP2R1B		hsa-miR-145 (2.7e-17) hsa-miR-142-5p (1.2e-08) hsa-miR-183 (6.6e-08) hsa-miR-20a (9.5e-06) hsa-miR-23b (0.00016) hsa-miR-130b (0.0002) hsa-miR-19b (0.00063)
REACTOME_FORMATION_AND_MATURATION_OF_MRNA_TRANSCRIPT	CCAR1 PTBP1 DHX9 TAF10 TAF13 TAF12 SF3B4 SF3B2 SSRP1 TXNL4A NCBP2 NCBP1 SNRPD3 SNRPD1 PRPF4 PRPF6 FUS SUPT16H CTDP1 TH1L ERCC2 LSM2 RDBP GTF2H4 GTF2H3 TCEB2 TCEB3 TCEB1 RNMT GTF2E1 DDX23 SNRPA1 HNRNPU HNRNPL TAF1 TAF4 TAF5 WHSC2 GTF2A1 NFX1 CDK7 CPSF3 CPSF2 CPSF1 U2AF2 RBM8A SFRS9 ELL RNGTT POLR2H POLR2G POLR2K POLR2J POLR2I POLR2D SF4 CD2BP2 PAPOLA EFTUD2 SNRPB SNRPF SNRPE SNRPG CSTF3 CSTF2 RNPS…	*	hsa-miR-496 (6.8e-15) hsa-miR-148a (3.9e-10) hsa-miR-30b (7.3e-07) hsa-miR-152 (2.2e-06) hsa-miR-132 (2.2e-06) hsa-miR-212 (3.9e-05) hsa-miR-9 (7.7e-05) hsa-miR-194 (0.00023) hsa-miR-331 (0.00088) hsa-miR-24 (0.0016) hsa-miR-133a (0.0028) hsa-miR-148b (0.005) hsa-miR-125b (0.0052) hsa-miR-204 (0.0056) hsa-let-7b (0.0068) hsa-miR-302a (0.0077) hsa-miR-299-3p (0.0079)
REACTOME_ENDOGENOUS_STEROLS	CYP7A1 CYP1B1 CYP46A1 CYP7B1 CYP17A1 CYP8B1 CYP39A1 CYP19A1 CYP11B1 CYP11A1		hsa-miR-27b (1.7e-07) hsa-miR-758 (0.00091)
REACTOME_LIPOPROTEIN_METABOLISM	A2M APOA4 ABCA1 APOB LCAT HSPG2 ALB LPL LIPC		hsa-miR-145 (9e-13) hsa-miR-142-5p (9.6e-09) hsa-miR-101 (6.7e-08) hsa-miR-183 (3.8e-07) hsa-miR-19b (0.00022) hsa-miR-149 (0.00022) hsa-miR-33 (0.0019) hsa-miR-19a (0.0047) hsa-miR-15b (0.0049) hsa-miR-181b (0.0057) hsa-miR-29b (0.0079)
REACTOME_NUCLEAR_RECEPTOR_TRANSCRIPTION_PATHWAY	RORB RXRG HNF4A ESRRA NR5A2 NR2E1 NR2C1 NR4A2 NR4A1 NR4A3 ESR2 NR3C2 NR3C1 RARB NR1H4 NR1H3 NRBF2 PPARA PPARG NR2F1 NR1D2 THRA THRB NR0B1		hsa-miR-335 (3.4e-31) hsa-miR-181b (1.4e-16) hsa-miR-33 (2.1e-12) hsa-miR-181c (5.9e-07) hsa-miR-149 (6.2e-07) hsa-miR-367 (1.7e-06) hsa-miR-137 (3.6e-05) hsa-miR-323 (4.6e-05) hsa-miR-130b (6.3e-05) hsa-miR-183 (0.00011) hsa-miR-375 (0.00024) hsa-miR-144 (0.0014) hsa-miR-25 (0.0017) hsa-miR-103 (0.0026) hsa-miR-21 (0.0051) hsa-miR-19b (0.0064)
REACTOME_G_ALPHA_S_SIGNALLING_EVENTS	GNG2 GNG7 GNAI1 PTH2R GNAZ PDE11A GIP GNG13 GNG11 PDE1A PDE2A GNG10 PDE3B PDE4C ADORA2B DRD5 PDE7B PDE8B PDE8A PTGER2 PTGER4 ADRB2 VIP ADCY3 ADCY4 ADCY8 ADCY6 GPBAR1 HTR7 POMC ADM PTGDR AVPR2 SCTR PTHLH INSL3 TAAR9 RAMP2 CALCR CRH		hsa-miR-335 (7.8e-18) hsa-miR-92 (5e-15) hsa-miR-181c (6e-08) hsa-miR-101 (5.7e-07) hsa-miR-485-3p (6.3e-05) hsa-miR-23b (0.00021) hsa-miR-23a (0.00033) hsa-miR-19a (0.00067) hsa-miR-19b (0.0011) hsa-miR-424 (0.0016) hsa-miR-32 (0.0024) hsa-miR-181b (0.0039) hsa-miR-181a (0.0085)
REACTOME_DARPP32_EVENTS	PPP1R1B PPP2CB PPP3CB PPP3CC PPP3CA PRKAR2B PDE4C PRKAR1A PPP2R1B CALM1		hsa-miR-183 (5e-05)
REACTOME_NEUROTRANSMITTER_RELEASE_CYCLE	MAOA SNAP25 VAMP2 SLC1A7 DDC STXBP1 GLS SYN2 SLC17A7		hsa-miR-181c (1.5e-12) hsa-miR-25 (8.6e-12) hsa-miR-23b (1.5e-11) hsa-miR-335 (1.8e-09) hsa-miR-367 (9.6e-09) hsa-miR-181a (3.5e-08) hsa-miR-92 (4.3e-08) hsa-miR-218 (1.2e-05) hsa-miR-106b (0.00066) hsa-miR-15b (0.0039) hsa-miR-20a (0.004)
REACTOME_P75NTR_SIGNALS_VIA_NFKB	RELA IKBKB MYD88 IRAK1 PRKCI SQSTM1 RIPK2		hsa-miR-142-3p (0.00016)
REACTOME_HDL_MEDIATED_LIPID_TRANSPORT	A2M ABCA1 LCAT ALB		hsa-miR-142-5p (2.4e-23) hsa-miR-183 (2.5e-12) hsa-miR-19b (8.6e-12) hsa-miR-19a (3.3e-10) hsa-miR-145 (1.2e-07) hsa-miR-101 (0.0047) hsa-miR-181b (0.0074)
REACTOME_NEF_MEDIATED_DOWNREGULATION_OF_MHC_CLASS_I_COMPLEX_CELL_SURFACE_EXPRESSION	PACS1 AP1S3 AP1S1 AP1G1 AP1M1 AP1M2 AP1B1		hsa-miR-148b (1.8e-05) hsa-let-7a (0.0017) hsa-miR-299-3p (0.003)
REACTOME_ERKS_ARE_INACTIVATED	PPP2CB DUSP6 PPP2R1B		hsa-miR-145 (1.1e-13) hsa-miR-92 (6.8e-05) hsa-miR-32 (0.00012) hsa-miR-183 (0.0052)
REACTOME_METABOLISM_OF_AMINO_ACIDS	PCBD1 HSD17B10 ASL ALDH18A1 AZIN1 SLC1A4 SLC43A2 SLC7A11 MCCC2 ADC BCKDHA PYCR1 KMO AGMAT SLC25A15 SLC7A5 SLC7A7 OAZ3 ASNS SLC36A1 GOT2 GOT1 GCDH CKMT1A SLC16A10 SLC25A2 BCAT2 PSMD14 PSMD13 PSMD12 PSMD11 PSMA6 PSMA5 PSMA4 PSMA3 SLC38A5 SRM PSMA7 PSMB4 IVD PSMB3 PSMB2 PSMC4 PSMC3 PSMC2 TDO2 PSMD1 PSMD2 PSMD3 PSMD4 PSMD8 PSME1 PSME2 PSME3 SMS PSMB10 SLC6A6		hsa-miR-802 (0.00064) hsa-miR-320 (0.0047)
REACTOME_GLUCURONIDATION	UGT2B28 UGT2B11 UGT2B10 UGT2B15 UGP2 UGT1A8 UGT2A1 UGT2B4 UGT2B7		hsa-miR-92 (8.6e-23) hsa-miR-367 (3.8e-16) hsa-miR-25 (1.5e-11) hsa-miR-92b (3.1e-09) hsa-miR-32 (1.5e-05) hsa-miR-137 (0.00038)
REACTOME_LYSOSOME_VESICLE_BIOGENESIS	ARF1 VAMP8 DNASE2 CLTC AP1S3 AP1S1 DNM2 AP1G1 M6PR AP1M1 AP1M2 AP1B1 CTSZ	*	hsa-miR-148a (1.1e-11) hsa-miR-148b (1.4e-07) hsa-miR-299-3p (2.7e-06) hsa-miR-125b (3e-06) hsa-miR-1 (1e-05) hsa-miR-152 (0.00012) hsa-miR-125a (0.00012) hsa-miR-205 (0.00056) hsa-miR-204 (0.00093) hsa-let-7e (0.0011) hsa-let-7f (0.0017) hsa-let-7a (0.0071)
REACTOME_G_ALPHA_Q_SIGNALLING_EVENTS	AGTR1 GNG2 GNG7 GNG13 GNG11 CCL23 DGKI HTR2A NTSR2 ADRA1B CHRM3 CCK TAC1 OXTR ANXA1 EDN3 EDN1 GRK5 EDNRB PROK2 PROK1 NMB PTGFR ITPR1 ITPR2 KALRN TACR2 MGLL PLCB1 NPFF PIK3R1 NTS		hsa-miR-145 (3.4e-12) hsa-miR-142-5p (5.7e-12) hsa-miR-19a (4.2e-07) hsa-miR-92 (8e-07) hsa-miR-130a (1.9e-06) hsa-miR-367 (0.0001) hsa-miR-218 (0.00015) hsa-miR-25 (0.00021) hsa-miR-301 (0.00044) hsa-miR-19b (0.0035)
REACTOME_PKA_ACTIVATION	PRKAR2B PRKAR1A ADCY3 ADCY4 ADCY8 ADCY5 ADCY6		hsa-miR-92 (4.6e-09) hsa-miR-335 (7.6e-09) hsa-miR-19b (5.5e-05) hsa-miR-367 (0.0012)
REACTOME_INFLUENZA_VIRAL_RNA_TRANSCRIPTION_AND_REPLICATION	RPL18 RPL14 RPL13 RPL15 RPLP2 RPL10 FAU RPL11 RPL12 RPS18 RPS17 RPS14 RPS15 RPS13 RPS11 RPS25 RPS27 RPS29 RPS21 RPS23 RPS24 RPS9 RPS6 RPS5 RPS8 RPS7 RPL41 RPL37 RPL32 RPL31 RPL34 RPL26 RPL27 RPL24 RPL29 RPL22 RPL21 RPS27A RPL35A RPL6 RPL9 RPL3 RPL5 RPL10A RPL7A RPL4 RPL37A RPS3 RPS3A RPS4X RPS15A RPL13A RPL27A POLR2A	*	hsa-miR-142-5p (1e-77) hsa-miR-376a (6.1e-27) hsa-miR-218 (5.8e-25) hsa-miR-137 (1.2e-15) hsa-miR-376b (1.5e-11) hsa-miR-21 (2.8e-10) hsa-miR-153 (2.7e-05)
REACTOME_GENE_EXPRESSION	MED25 MED24 MED20 RAE1 MED26 CCAR1 PTBP1 MED12 MED14 MED13 SARS2 MED16 PABPC1 DHX9 GARS TAF10 TAF13 AARS2 SF3B4 SF3B2 PARS2 TXNL4A NCBP2 NCBP1 SNRPD3 SNRPD1 NR2C2 PRPF6 TARS2 IARS2 RPL26L1 HARS FUS NR1I3 PPARD SEH1L FARSB FARSA CTDP1 CARS TH1L EIF3I NUP188 TPR TARS NUP155 LSM2 YARS RDBP RPS26 GTF2H3 DARS2 NUP205 NUP214 NUP210 MARS TCEB2 TCEB3 TCEB1 RNMT GTF2E1 DDX23 SNRPA1 HNRNPU EARS2 TAF1 TAF4 …		hsa-miR-152 (8.1e-05) hsa-miR-186 (0.00087) hsa-miR-320 (0.0045) hsa-miR-496 (0.0052)
REACTOME_SMOOTH_MUSCLE_CONTRACTION	ACTG2 ACTA2 SORBS3 SORBS1 PXN LMOD1 CALM1 MYL9 MYLK CALD1 TPM2 TPM1		hsa-miR-145 (1.8e-38) hsa-miR-142-5p (3.7e-28) hsa-miR-770-5p (5.9e-19) hsa-miR-218 (2.1e-18) hsa-miR-20a (5.4e-14) hsa-miR-106b (1.7e-09) hsa-miR-137 (5e-06) hsa-miR-16 (5.7e-06) hsa-miR-199b (9.1e-06) hsa-miR-365 (5.5e-05) hsa-miR-29b (0.00062) hsa-miR-96 (0.0031)
REACTOME_PEPTIDE_LIGAND_BINDING_RECEPTORS	AGTR1 AGTR2 GPER SSTR1 NPY5R PENK C3 NPY2R C5 CCL28 CCL27 CCL23 CCL21 CCBP2 NPY1R CCL16 CXCL12 GALR1 NTSR2 CCL2 CX3CL1 CCRL1 CCK TAC1 OXTR PF4 ANXA1 EDN3 EDN1 PPBP CX3CR1 PRLHR POMC NPY EDNRB PROK2 PROK1 CXCL1 AVPR2 CXCL3 CXCL2 NMB DARC INSL3 TACR2 CXCR7 NPFF NTS		hsa-miR-144 (5e-34) hsa-miR-23b (5.3e-19) hsa-miR-218 (1.5e-16) hsa-miR-142-5p (2.5e-14) hsa-miR-15a (3e-12) hsa-miR-101 (1e-09) hsa-miR-23a (1.9e-09) hsa-miR-15b (5.2e-08) hsa-miR-214 (1.6e-05) hsa-miR-29b (9.1e-05) hsa-miR-29a (0.00024) hsa-miR-33 (0.00076) hsa-miR-323 (0.0017)
REACTOME_CELL_CELL_ADHESION_SYSTEMS	CTNNB1 PVRL3 CDH12 CDH13 CDH10 CLDN8 CLDN5 CLDN2 CDH3 CDH4 CDH6 CDH9 PARD3 CLDN19 CLDN10 CLDN11 CLDN23 PARD6G		hsa-miR-32 (2.3e-09) hsa-miR-15a (4.5e-06) hsa-miR-92 (5.7e-06) hsa-miR-25 (5.7e-06) hsa-miR-181c (1.4e-05) hsa-miR-181b (0.0025) hsa-miR-16 (0.0027) hsa-miR-183 (0.0085)
REACTOME_REGULATION_OF_ORNITHINE_DECARBOXYLASE	AZIN1 OAZ3 OAZ1 PSMD14 PSMD13 PSMD12 PSMD11 PSMA1 PSMA6 PSMA5 PSMA4 PSMA3 PSMA7 PSMB4 PSMB3 PSMB2 PSMC4 PSMC3 PSMC2 PSMD1 PSMD2 PSMD3 PSMD4 PSMD8 PSME1 PSME2 PSME3 PSMB10	*	hsa-miR-802 (1.4e-26) hsa-miR-186 (8e-14) hsa-miR-146a (1.6e-11) hsa-miR-515-5p (3.4e-08) hsa-miR-146b (9.8e-06) hsa-miR-30b (2.4e-05) hsa-miR-620 (0.00025) hsa-miR-603 (0.00028) hsa-miR-765 (0.00037) hsa-miR-555 (0.0012) hsa-miR-212 (0.0019) hsa-miR-132 (0.0045)
REACTOME_G2_M_TRANSITION	TSGA14 CSNK1D SSNA1 TUBG1 TUBG2 NDE1 TUBA4A NEK2 ALMS1 CEP250 CETN2 YWHAG CEP72 CEP78 PKMYT1 CEP70 FGFR1OP TUBGCP2 TUBB2C CCNA2 PCNT NUMA1 CCNB1 CCNB2 XPO1 AZI1 TUBB PLK4 PLK1 CDK7 ODF2 CDC25C CDC25A CDC25B CEP164 CKAP5	*	hsa-miR-148b (2.5e-15) hsa-miR-30b (4.7e-13) hsa-miR-148a (8.3e-08) hsa-let-7a (3.8e-07) hsa-miR-185 (5e-07) hsa-miR-34a (7.8e-07) hsa-miR-496 (2.9e-06) hsa-miR-155 (2.8e-05) hsa-miR-30c (5.6e-05) hsa-miR-125b (0.00017) hsa-miR-320 (0.0014) hsa-miR-186 (0.0017) hsa-let-7f (0.0019) hsa-miR-346 (0.0039)
REACTOME_INTEGRATION_OF_ENERGY_METABOLISM	PPP2R5D CACNB3 NDUFB11 NDUFB10 PDK3 SDHC CYC1 UQCRQ GCK MDH2 ALDOA IDH2 ATP5E KCNJ11 STX1A PRKAA2 COX5A PRKAB1 COX6C COX8A UQCRC1 PFKL GAPDH GNG5 NDUFA13 NDUFA11 GNB2 GNB1 GNB3 PRKAR2A SLC2A1 STK11 ATP5J2 PRKAR1B NDUFV2 CACNA1D NDUFS6 NDUFS8 NDUFS2 ATP5G1 ADCY1 ADCY7 PFKFB4 PFKFB2 COX6B1 COX6A1 ADCY9 PGK1 CPT2 NDUFC2 NDUFB4 NDUFB9 NDUFB2 NDUFA3 NDUFA7		hsa-let-7f (0.0037)
REACTOME_GTP_HYDROLYSIS_AND_JOINING_OF_THE_60S_RIBOSOMAL_SUBUNIT	RPL18 RPL14 RPL13 RPL15 RPLP2 RPL10 FAU RPL11 RPL12 RPS18 RPS17 RPS14 RPS15 RPS13 RPS11 RPS25 RPS27 RPS29 RPS21 RPS23 RPS24 RPS9 RPS6 RPS5 RPS8 RPS7 RPL41 EIF4A2 RPL37 RPL32 RPL31 RPL34 RPL26 RPL27 RPL24 RPL29 RPL22 RPL21 EIF5 RPS27A RPL35A RPL6 RPL9 RPL3 RPL5 RPL10A RPL7A RPL4 RPL37A RPS3 RPS3A RPS4X RPS15A RPL13A RPL27A EIF3D EIF3G EIF3E EIF3F EIF3K EIF4B	*	hsa-miR-376a (1.1e-48) hsa-miR-19b (2.9e-38) hsa-miR-376b (1.1e-29) hsa-miR-183 (1.4e-21) hsa-miR-149 (4e-21) hsa-miR-142-5p (1.7e-15) hsa-miR-15a (4e-15) hsa-miR-101 (1.5e-11) hsa-miR-335 (5.4e-11) hsa-miR-19a (2.9e-08) hsa-miR-181c (3.3e-08) hsa-miR-145 (1.3e-07) hsa-miR-543 (4.3e-07) hsa-miR-16 (3.2e-06) hsa-miR-135a (6.3e-06) hsa-miR-26a (9.4e-06) hsa-miR-181a (1.1e-05) hsa-miR-218 (2.6e-05) …
REACTOME_POLYMERASE_SWITCHING	PCNA POLA1 POLA2 POLD4 POLD1 POLD2 PRIM2 RFC5 RFC3 RFC4 RFC2		hsa-miR-154 (6.2e-16) hsa-miR-1 (1.2e-07) hsa-miR-217 (0.0043) hsa-miR-134 (0.0072)
REACTOME_ZINC_TRANSPORTATION	SLC39A10 SLC39A7 SLC39A3 SLC39A1 SLC30A1 SLC30A6 SLC30A7		hsa-miR-217 (5.8e-05)
REACTOME_E2F_MEDIATED_REGULATION_OF_DNA_REPLICATION	TFDP1 E2F2 E2F3 FBXO5 TYMS ORC1L PCNA CCNE1 CDC6 RRM2 POLA1 POLA2 CCNB1 ORC6L ORC5L ORC2L CDC25A PRIM2 CDT1 MCM8	*	hsa-miR-30b (5.3e-28) hsa-let-7b (3.1e-07) hsa-miR-186 (5.7e-06) hsa-miR-643 (4.2e-05) hsa-miR-200a (0.00016) hsa-let-7i (0.00019) hsa-miR-148a (0.00028) hsa-miR-148b (0.00034) hsa-miR-185 (0.00041) hsa-miR-141 (0.00083) hsa-miR-125b (0.002) hsa-miR-152 (0.0021) hsa-miR-210 (0.0052) hsa-miR-9 (0.0082)
REACTOME_PLATELET_AGGREGATION_PLUG_FORMATION	APBB1IP SOS1 FGA ADRA2A ADRA2C ADRA2B RAPGEF3 RAP1A RAP1B TLN1 RASGRP2 VWF		hsa-miR-181c (1.1e-08) hsa-miR-149 (7e-08) hsa-miR-19b (3.1e-07) hsa-miR-19a (6.3e-05) hsa-miR-96 (0.0013) hsa-miR-144 (0.0026) hsa-miR-32 (0.0064) hsa-miR-181a (0.0097)
REACTOME_CREB_PHOSPHORYLATION_THROUGH_THE_ACTIVATION_OF_CAMKII	GRIN2B GRIN2C GRIN2D GRIN2A ACTN2 GRIN1 DLG4 CREB1 CALM3 CALM2 CALM1 CAMK2G CAMK2D CAMK2B NEFL CAMK2A		hsa-miR-181c (3.3e-08) hsa-miR-23b (0.00011) hsa-miR-367 (0.00073) hsa-miR-130b (0.0023) hsa-miR-25 (0.0085)
REACTOME_ACTIVATION_OF_RAC	NCK1 SOS1 SOS2 SLIT2 PAK7 PAK3		hsa-miR-149 (3e-07) hsa-miR-15a (0.0043)
REACTOME_REGULATION_OF_PYRUVATE_DEHYDROGENASE_COMPLEX	PDHA1 PDK2 PDK4 DLD		hsa-miR-15a (0.00026) hsa-miR-181c (0.0028) hsa-miR-181a (0.0095)
REACTOME_FRS2_MEDIATED_ACTIVATION	HRAS BRAF MAPK1 NRAS FRS2 KRAS YWHAB MAP2K2		hsa-miR-217 (4.2e-07) hsa-miR-30c (0.00053) hsa-miR-148b (0.0012) hsa-miR-148a (0.0041) hsa-miR-152 (0.006) hsa-let-7f (0.0067)
REACTOME_SIGNALLING_BY_NGF	HRAS PPP2R5D BRAF MAPK1 AP2S1 ARHGEF18 ARHGEF16 ARHGEF11 THEM4 NRAS GSK3A GSK3B RALA FRS2 RELA ADORA2A MAPKAPK3 MAPKAPK2 FGD3 ARHGDIA AP2M1 FURIN HDAC1 IKBKB PREX1 CASP3 CASP2 BAD MYD88 PSENEN CAMK4 KRAS AP2B1 PDPK1 YWHAB AP2A2 GRB2 DNAL4 CLTC SHC1 IRAK1 PRKCI PRKCD MDM2 TRIB3 PIK3R2 MAGED1 MAP2K2 ARHGEF2 ARHGEF1 PCSK6 RPS6KA1 PRKAR2A RASGRF1 AKT1S1 VAV3 VAV2 PRKAR1B TSC2 APH1A SMPD2 ADCY1 ADCY7 …		hsa-miR-138 (2.5e-09) hsa-let-7f (0.00012) hsa-miR-132 (0.00012) hsa-miR-148a (0.0072)
REACTOME_MUSCLE_CONTRACTION	ACTG2 MYH3 TNNI1 TNNI2 ACTA2 SORBS3 SORBS1 VIM NEB PXN DMD MYBPC2 MYBPC1 LMOD1 CALM1 TTN TNNT3 MYL2 MYL3 MYL1 MYL9 MYLK TLN1 CALD1 TPM2 TPM1 MYL6B	*	hsa-miR-145 (5.6e-26) hsa-miR-199b (6.5e-21) hsa-miR-20a (1.1e-17) hsa-miR-181c (3e-15) hsa-miR-137 (5.7e-11) hsa-miR-101 (1.4e-10) hsa-miR-770-5p (1.1e-08) hsa-miR-142-5p (1.3e-08) hsa-miR-144 (4.2e-08) hsa-miR-218 (2.3e-05) hsa-miR-214 (0.00071) hsa-miR-365 (0.0012) hsa-miR-208 (0.0022) hsa-miR-153 (0.01)
REACTOME_SEROTONIN_NEUROTRANSMITTER_RELEASE_CYCLE	SNAP25 VAMP2 DDC STXBP1 SYN2		hsa-miR-92 (3.4e-15) hsa-miR-25 (1.2e-13) hsa-miR-335 (1.5e-11) hsa-miR-367 (2.9e-08) hsa-miR-153 (5.6e-06) hsa-miR-130a (0.00022) hsa-miR-15b (0.00088) hsa-miR-218 (0.0019) hsa-miR-429 (0.0079)
REACTOME_DOUBLE_STRAND_BREAK_REPAIR	LIG1 TP53BP1 RAD51 BRCA2 PRKDC RPA3 H2AFX TDP1	*	hsa-miR-24 (9.7e-09)
REACTOME_CYCLIN_E_ASSOCIATED_EVENTS_DURING_G1_S_TRANSITION_	CCNA2 CCNE2 CCNE1 CDK7 CDK2 CDC25A PSMD14 PSMD13 PSMD12 PSMD11 PSMA6 PSMA5 PSMA4 PSMA3 PSMA7 PSMB4 PSMB3 PSMB2 PSMC4 PSMC3 PSMC2 PSMD1 PSMD2 PSMD3 PSMD4 PSMD8 PSME1 PSME2 PSME3 PSMB10	*	hsa-miR-496 (1e-18) hsa-miR-30b (9.9e-14) hsa-miR-186 (1.2e-10) hsa-miR-146b (4.2e-09) hsa-miR-765 (6.2e-09) hsa-miR-802 (2.5e-07) hsa-miR-555 (1.7e-06) hsa-miR-146a (0.00033) hsa-miR-138 (0.00046) hsa-miR-302a (0.00047) hsa-miR-515-5p (0.001) hsa-let-7a (0.0011) hsa-miR-30e-5p (0.0034) hsa-miR-302b (0.0073)
REACTOME_SIGNALING_BY_VEGF	FIGF FLT4 VEGFC PDGFC		hsa-miR-149 (3.2e-16)
REACTOME_CYTOCHROME_P450_ARRANGED_BY_SUBSTRATE_TYPE	CYP7A1 CYP1A1 CYP1A2 CYP1B1 CYP2B6 CYP46A1 CYP7B1 CYP17A1 CYP8B1 CYP2C18 CYP2F1 CYP2A13 CYP2A6 CYP2U1 CYP4A11 CYP3A4 CYP3A5 CYP3A7 CYP26A1 CYP4B1 CYP39A1 PTGIS CYP19A1 CYP11B1 CYP11A1 CYP26B1		hsa-miR-20a (2.1e-26) hsa-miR-149 (1.5e-18) hsa-miR-27b (6.1e-11) hsa-miR-106b (3.1e-08) hsa-let-7d (0.0016) hsa-miR-758 (0.002) hsa-miR-15b (0.0044)
REACTOME_SIGNALING_BY_WNT	PPP2R5D GSK3B BTRC PSMD14 PSMD13 PSMD11 PSMA6 PSMA4 PSMA3 PSMA7 PSMB4 PSMB3 PSMB2 AXIN1 PSMC4 PSMC2 PSMD1 PSMD2 PSMD3 PSMD4 PSMD8 PSME1 PSME2 PSME3	*	hsa-miR-30b (1.3e-24) hsa-miR-802 (6.3e-09) hsa-miR-146a (4.5e-06) hsa-miR-515-5p (1.4e-05) hsa-miR-186 (1.9e-05) hsa-miR-765 (7.3e-05) hsa-miR-30d (9.4e-05) hsa-miR-555 (0.00083) hsa-miR-30c (0.0067) hsa-miR-146b (0.0081)
REACTOME_GLOBAL_GENOMIC_NER	LIG1 RAD23B DDB1 RPA3 ERCC3 ERCC4 ERCC1 ERCC2 PCNA GTF2H4 GTF2H3 POLE2 POLD4 POLD1 POLD2 CDK7 POLE RFC5 RFC3 RFC4 RFC2		hsa-miR-496 (1.9e-05)
REACTOME_SIGNALLING_TO_ERKS	HRAS BRAF MAPK1 NRAS RALA FRS2 MAPKAPK3 MAPKAPK2 KRAS RIT1 YWHAB GRB2 SHC1 RALGDS MAP2K2 MAPK12 MAPK13 SRC		hsa-miR-217 (4.4e-28) hsa-miR-30b (1.1e-07) hsa-miR-148a (2.3e-07) hsa-miR-320 (2.4e-07) hsa-miR-152 (4.7e-05) hsa-miR-132 (5e-05) hsa-let-7a (0.002) hsa-miR-148b (0.0066)
REACTOME_CLATHRIN_DERIVED_VESICLE_BUDDING	ARF1 TFRC VAMP8 DNASE2 GAK TPD52 GBF1 RAB5C CLTC TGOLN2 AP1S3 AP1S1 STX4 DNM2 AP1G1 M6PR IGF2R AP1M1 AP1M2 AP1B1 AP3B1 NAPA CTSZ		hsa-miR-148a (1.1e-19) hsa-miR-185 (4.4e-10) hsa-miR-152 (1.7e-08) hsa-miR-125b (2e-06) hsa-miR-138 (0.00021) hsa-miR-299-3p (0.00078) hsa-miR-320 (0.0015) hsa-miR-194 (0.0044)
REACTOME_TRNA_AMINOACYLATION	SARS2 WARS2 GARS AARS2 PARS2 MARS2 TARS2 IARS2 HARS FARSB FARSA CARS TARS LARS2 YARS DARS2 MARS EARS2 CARS2 NARS2 VARS EPRS NARS LARS	*	hsa-miR-205 (2.9e-11)
REACTOME_MAP_KINASES_ACTIVATION_IN_TLR_CASCADE	MEF2C MEF2A MAP2K6 JUN MAP2K1 PPP2CB RPS6KA5 RPS6KA3 DUSP6 ATF1 PPP2R1B FOS		hsa-miR-181c (1.6e-12) hsa-miR-183 (2.6e-08) hsa-miR-142-5p (3.4e-08) hsa-miR-181a (1.1e-07) hsa-miR-20a (7.9e-06) hsa-miR-23b (1.2e-05) hsa-miR-145 (1.3e-05) hsa-miR-19b (0.0011) hsa-miR-424 (0.0033) hsa-miR-96 (0.0081) hsa-miR-19a (0.0088)
REACTOME_METABOLISM_OF_CARBOHYDRATES	RAE1 PHKG2 PHKA1 GCK ALDOA SEH1L SLC25A13 SLC25A10 NUP188 TPR PFKL GAPDH NUP155 NUP205 HK1 NUP214 NUP210 HK3 SLC2A1 NUP85 NUP98 NUP93 GOT1 PGLS PFKFB4 PFKFB2 NUP50 NUP62 GALK1 PGK1 NUPL1 PRPS2 GALE		hsa-miR-148a (1.7e-06) hsa-miR-185 (0.0055)
REACTOME_FURTHER_PLATELET_RELEASATE	TF CALM1 TTN HABP4 TLN1 SCG3		hsa-miR-101 (6.2e-17) hsa-miR-770-5p (0.004)
REACTOME_OPIOID_SIGNALLING	PPP1R1B GNG2 GNG7 GNAI1 GNAZ GNAL GNG13 GNG11 PDE1C PDE1A PPP2CB PPP3CA PRKAR2B PDE4C PPP2R1B ADCY3 ADCY4 ADCY8 ADCY6 POMC PLA2G4A ITPR1 ITPR2 CALM1 PLCB1		hsa-miR-92 (1.2e-29) hsa-miR-145 (3.4e-14) hsa-miR-218 (1.2e-12) hsa-miR-335 (2e-09) hsa-miR-183 (7.7e-06) hsa-miR-92b (1.2e-05) hsa-miR-19b (1.5e-05) hsa-miR-485-3p (3.7e-05) hsa-miR-130a (4.4e-05) hsa-miR-106b (0.0026) hsa-miR-770-5p (0.0074) hsa-miR-20a (0.0082) hsa-miR-424 (0.0094)
REACTOME_TRANSPORT_OF_THE_SLBP_INDEPENDENT_MATURE_MRNA	RAE1 NCBP2 NCBP1 SEH1L NUP188 TPR NUP155 NUP205 NUP214 NUP210 NUP85 NUP98 NUP93 NUP50 NUP62 NUPL1	*	hsa-miR-185 (7.4e-42) hsa-miR-125a (6e-07) hsa-miR-514 (2.3e-06) hsa-miR-93 (0.00027) hsa-miR-125b (0.0016)
REACTOME_COLLAGEN_MEDIATED_ACTIVATION_CASCADE	PDPK1 PIK3R5 SYK COL1A2 COL1A1 VAV3 VAV2 AKT1		hsa-let-7f (0.0005)
REACTOME_HIV1_TRANSCRIPTION_ELONGATION	SSRP1 NCBP2 NCBP1 SUPT16H CTDP1 TH1L ERCC3 ERCC2 RDBP GTF2H4 GTF2H3 SUPT4H1 TCEB2 TCEB3 TCEB1 WHSC2 CDK7 ELL POLR2H POLR2G POLR2K POLR2J POLR2I POLR2D	*	hsa-miR-496 (2.7e-18) hsa-miR-24 (1.8e-05) hsa-miR-30b (0.00067) hsa-miR-93 (0.0021) hsa-miR-302b (0.0032) hsa-miR-302a (0.0053)
REACTOME_COSTIMULATION_BY_THE_CD28_FAMILY	PPP2R5D HLA-DQA2 RAC1 HLA-DOA THEM4 HLA-DQB1 PDPK1 GRB2 CD80 TRIB3 CTLA4 CDC42 SRC PTPN6 CD274 AKT1 PAK2 PAK1 CSK ICOSLG		hsa-miR-155 (0.00028) hsa-miR-1 (0.0022) hsa-let-7b (0.0022)
REACTOME_CD28_DEPENDENT_VAV1_PATHWAY	GRB2 CD80 CDC42 PAK2 PAK1		hsa-miR-1 (2.5e-05) hsa-miR-185 (0.0011) hsa-let-7a (0.0023)
REACTOME_INHIBITION_OF_INSULIN_SECRETION_BY_ADRENALINE_NORADRENALINE	GNG2 GNG7 GNAI1 CACNB2 GNG13 GNG11 ADRA2A ADRA2C CACNA1C		hsa-miR-19b (1.6e-34) hsa-miR-181c (3.4e-09) hsa-miR-485-3p (8e-08) hsa-miR-92 (3.2e-06) hsa-miR-19a (0.0016) hsa-miR-181b (0.0083)
REACTOME_ACTIVATED_TLR4_SIGNALLING	MYD88 SIGIRR IRAK4 IRAK1 IRF3 TIRAP		hsa-miR-142-3p (0.00015)
REACTOME_IONOTROPIC_ACTIVITY_OF_KAINATE_RECEPTORS	GRIK1 GRIK2 GRIK3 NCALD CALM1		hsa-miR-181c (5.4e-15) hsa-miR-19b (6.8e-07) hsa-miR-218 (1.3e-05) hsa-miR-19a (0.00041)
REACTOME_FORMATION_OF_A_POOL_OF_FREE_40S_SUBUNITS	RPL18 RPL14 RPL13 RPL15 RPLP2 RPL10 FAU RPL11 RPL12 RPS18 RPS17 RPS14 RPS15 RPS13 RPS11 RPS25 RPS27 RPS29 RPS21 RPS23 RPS24 RPS9 RPS6 RPS5 RPS8 RPS7 RPL41 RPL37 RPL32 RPL31 RPL34 RPL26 RPL27 RPL24 RPL29 RPL22 RPL21 RPS27A RPL35A RPL6 RPL9 RPL3 RPL5 RPL10A RPL7A RPL4 RPL37A RPS3 RPS3A RPS4X RPS15A RPL13A RPL27A EIF3D EIF3G EIF3E EIF3F EIF3K	*	hsa-miR-142-5p (3.5e-75) hsa-miR-218 (4.3e-34) hsa-miR-376a (1.1e-26) hsa-miR-376b (1.8e-17) hsa-miR-137 (5.1e-14) hsa-miR-21 (9e-08) hsa-miR-135a (3e-05) hsa-miR-381 (3.6e-05)
REACTOME_METABOLISM_OF_RNA	RAE1 PABPC1 NCBP2 NCBP1 SNRPD3 SNRPD1 DDX6 TNKS1BP1 SEH1L NUP188 TPR GEMIN6 GEMIN7 GEMIN5 NUP155 WDR77 LSM5 LSM4 LSM2 EXOSC4 CNOT10 EXOSC5 EXOSC3 NUP205 NUP214 NUP210 RQCD1 CNOT3 CNOT6 NUP85 NUP98 NUP93 DCPS CLNS1A NUP50 NUP62 PARN NUPL1 SNRPB SNRPF SNRPE SNRPG EIF4G1	*	hsa-miR-125a (3.1e-11) hsa-miR-125b (2.4e-08) hsa-miR-129-3p (1e-07) hsa-miR-148a (1.9e-07) hsa-miR-148b (1.7e-06) hsa-miR-186 (0.00034) hsa-miR-93 (0.0029)
REACTOME_RNA_POLYMERASE_III_TRANSCRIPTION	BRF2 GTF3C5 GTF3C2 GTF3C1 GTF3C4 GTF3A SNAPC2 SNAPC4 SNAPC3 POLR2H POLR2K POLR3H POLR3A POLR3D NFIC		hsa-let-7b (0.00056)
REACTOME_COMMON_PATHWAY	PF4V1 THBD FGA FGB PF4 F10 F13B PROS1		hsa-miR-101 (3.8e-27) hsa-miR-144 (5.5e-16) hsa-miR-29c (1.4e-08) hsa-miR-29a (1.3e-05) hsa-miR-29b (0.00036)
REACTOME_SCF_BETA_TRCP_MEDIATED_DEGRADATION_OF_EMI1	FBXO5 BTRC CDC20 PSMD14 PSMD13 PSMD12 PSMD11 PSMA6 PSMA5 PSMA4 PSMA3 FZR1 PSMA7 PSMB4 PSMB3 PSMB2 PSMC4 PSMC3 PSMC2 PSMD1 PSMD2 PSMD3 PSMD4 PSMD8 PSME1 PSME2 PSME3 PSMB10	*	hsa-miR-802 (8.4e-13) hsa-miR-30b (3.8e-12) hsa-miR-186 (3.6e-11) hsa-miR-146b (9.8e-09) hsa-miR-765 (1.4e-08) hsa-miR-30c (7.8e-06) hsa-miR-620 (0.0009) hsa-miR-30e-5p (0.0012) hsa-miR-555 (0.0026) hsa-miR-146a (0.0036) hsa-miR-212 (0.0047)
REACTOME_PI3K_AKT_SIGNALLING	RICTOR IRS2 IRS1 NR4A1 PTEN FOXO1 PIK3R1		hsa-miR-181c (2.1e-08) hsa-miR-145 (2.6e-08) hsa-miR-181b (2.2e-05) hsa-miR-181a (0.00069) hsa-miR-20a (0.0012)
REACTOME_FGFR_LIGAND_BINDING_AND_ACTIVATION	FGF7 FGF9 FGF2 SDC2 KL FGF10 FGFR1		hsa-miR-367 (6.4e-11) hsa-miR-92 (1.1e-09) hsa-miR-32 (3.4e-06) hsa-miR-218 (6.4e-06) hsa-miR-25 (0.00021) hsa-miR-15b (0.00039) hsa-miR-183 (0.0027) hsa-miR-96 (0.0099)
REACTOME_MITOTIC_PROMETAPHASE	RCC2 ZWINT AHCTF1 NDC80 KNTC1 ERCC6L MAD1L1 KIF2C NDE1 AURKB SEH1L DSN1 BIRC5 SPC25 APITD1 MLF1IP RANGAP1 CDCA8 NUF2 BUB1 BUB3 PLK1 SEC13 NUP98 MAD2L1 CDC20 PMF1 SGOL2 SGOL1 CKAP5 CASC5 BUB1B CENPA CENPO CENPN CENPL CENPP KIF18A CENPF CENPE CENPK CENPI	*	hsa-miR-129-3p (2.4e-09) hsa-miR-28 (0.00094) hsa-miR-603 (0.0072)
REACTOME_SIGNALING_BY_EGFR	HRAS MAPK1 AP2S1 NRAS STAM2 AP2M1 KRAS AP2B1 YWHAB GRB2 CLTC SHC1 MAP2K2 CDC42 STAM ADAM12 SRC EPS15L1 CSK		hsa-miR-185 (2.8e-05) hsa-let-7b (0.00042) hsa-miR-30c (0.0039) hsa-miR-148a (0.0073)
REACTOME_MYOGENESSIS	MEF2C MEF2A CTNNB1 MAP2K6 SPAG9 BNIP2 MYF6 CDH4 MAPK11 CDON BOC MYOG		hsa-miR-142-5p (1.1e-28) hsa-miR-19b (1.6e-15) hsa-miR-183 (5.4e-11) hsa-miR-23b (0.0018) hsa-miR-23a (0.0092) hsa-miR-19a (0.0097)
REACTOME_SEMA4D_IN_SEMAPHORIN_SIGNALING	RAC2 RAC1 ARHGEF11 RND1 CD72 SEMA4D ERBB2 CDC42 RHOC RHOG LIMK1 GRLF1		hsa-miR-185 (0.004)
REACTOME_REGULATION_OF_INSULIN_SECRETION_BY_GLUCAGON_LIKE_PEPTIDE_1	GNG2 GNG7 GNAI1 CACNB2 GNG13 GNG11 SNAP25 GNG10 KCNC2 PRKAR2B VAMP2 KCNB1 PRKAR1A CACNA1C CACNA1A STXBP1 SYT5 ADCY8 ADCY5 ADCY6 RAPGEF3 ITPR1 ITPR2 RAP1A RAP1B		hsa-miR-181c (1.2e-10) hsa-miR-92 (4.4e-10) hsa-miR-367 (7.5e-07) hsa-miR-19b (8.7e-06) hsa-miR-149 (2.2e-05) hsa-miR-92b (0.00024) hsa-miR-130a (0.00029) hsa-miR-33 (0.0013) hsa-miR-19a (0.0019) hsa-miR-545 (0.0066)
REACTOME_RNA_POLYMERASE_I_III_AND_MITOCHONDRIAL_TRANSCRIPTION	HIST1H4K HIST1H4A HIST1H4B HIST1H4E HIST1H4F HIST1H4I HIST1H4J HIST1H4H HIST1H3J HIST1H3A HIST1H3B HIST1H3E HIST1H3F HIST1H3G HIST1H3H HIST1H3I GTF3C1 GTF3C4 H2BFS HIST3H2BB UBTF HIST2H2AA3 HIST1H2BO HIST1H2BM HIST1H2BN HIST1H2BK HIST1H2BL HIST1H2BI HIST1H2BJ H3F3A HIST2H2AC GTF2H3 HIST2H2BE HIST1H2AB HIST1H2AC HIST1H2AD HIST1H2AE HIST1H2BB HIST1H2BD HIST1H2BE HIST1H2BF HIST1H2BG HIST1H2BH HIST1H…	*	hsa-miR-496 (2e-29) hsa-miR-802 (3.5e-17) hsa-miR-24 (2.9e-06) hsa-miR-584 (1.2e-05) hsa-let-7g (1.8e-05) hsa-let-7b (1.8e-05) hsa-miR-132 (0.00065) hsa-miR-659 (0.0052) hsa-miR-9 (0.0094)
REACTOME_TRANSMISSION_ACROSS_CHEMICAL_SYNAPSES	GRIN2B GNG2 GNG7 CACNB2 CACNB4 MAOA CACNG3 GRIP2 GNG13 GNG11 SNAP25 RPS6KA3 GNG10 GRIK1 GRIK2 GRIK3 NCALD RASGRF2 VAMP2 CACNA2D1 CACNA2D3 CACNA1A CACNA1B SLC1A7 DDC STXBP1 ADCY3 ADCY8 GRIA3 GRIA4 GRIA1 CALM1 GLS ALDH2 PLCB1 PRKCA SYN2 SLC17A7		hsa-miR-92 (1.6e-11) hsa-miR-23b (7.1e-09) hsa-miR-92b (1.8e-08) hsa-miR-182 (6.9e-07) hsa-miR-335 (9.1e-07) hsa-miR-218 (5.9e-06) hsa-miR-19b (3.3e-05) hsa-miR-181c (5.6e-05) hsa-miR-301 (0.00022) hsa-miR-130a (0.00029) hsa-miR-130b (0.003) hsa-miR-543 (0.0079)
REACTOME_PHOSPHOLIPASE_CMEDIATED_CASCADE	FGF6 FGF7 FGF9 FGF1 FGF2 KL FGF10 FGFR2 FGFR1		hsa-miR-183 (1.7e-17) hsa-miR-218 (1.1e-14) hsa-miR-543 (6.3e-08) hsa-miR-641 (1.3e-07) hsa-miR-199b (7.1e-07) hsa-miR-133b (0.0014) hsa-miR-338 (0.0048) hsa-miR-214 (0.0087)
REACTOME_SEMAPHORIN_INTERACTIONS	MET FES DPYSL2 SEMA5A SEMA6A SEMA6D SEMA3A FYN MYL9		hsa-miR-145 (0.00016) hsa-miR-183 (0.0017) hsa-miR-23b (0.0019)
REACTOME_TRANSPORT_OF_RIBONUCLEOPROTEINS_INTO_THE_HOST_NUCLEUS	RAE1 SEH1L NUP188 TPR NUP155 NUP205 NUP214 NUP210 NUP85 NUP98 NUP93 NUP50 NUP62 NUPL1 KPNB1 KPNA1	*	hsa-miR-185 (6.3e-35) hsa-miR-125a (1.2e-20) hsa-miR-125b (4.6e-14) hsa-miR-302c (2e-10) hsa-miR-148b (4.1e-08) hsa-miR-514 (1.3e-07) hsa-miR-93 (2e-06)
REACTOME_METABOLISM_OF_PROTEINS	TUBB2B RPL14 TUBB2A RPL13 RPL15 FAU RPL11 RPL12 RPS17 RPS14 RPS13 RPS25 RPS29 RPS6 RPS5 GAS6 RPS8 RPS7 PGAP1 EIF4A2 PFDN5 RPL32 RPL31 RPL34 RPL26 RPL27 RPL29 RPL22 RPL21 EIF5 RPS27A RPL35A FBXW7 RPL9 RPL3 RPL5 RPL10A RPL4 RPS3A RPS4X F10 SEMA6D TUBB6 EEF1B2 EIF3D EIF3F EIF3K EEF1A1 EIF4B PIGB PIGP PROS1 GSPT2		hsa-miR-142-5p (1.4e-15) hsa-miR-367 (3.2e-12) hsa-miR-19b (1.9e-08) hsa-miR-218 (5e-08) hsa-miR-145 (2.9e-07) hsa-miR-23b (9.3e-06) hsa-miR-23a (4.1e-05) hsa-miR-376b (9.6e-05) hsa-miR-335 (0.00056) hsa-miR-19a (0.0018) hsa-miR-181c (0.0028) hsa-miR-101 (0.0044) hsa-miR-26a (0.0095)
REACTOME_SIGNALING_BY_BMP	FSTL1 NOG BMP2 SMAD9 SMAD4 CHRDL1 GREM2 ACVR2A BMPR1A		hsa-miR-181c (8.2e-13) hsa-miR-23b (1.2e-06) hsa-miR-145 (2.7e-06) hsa-miR-429 (6.3e-05) hsa-miR-92 (9.3e-05) hsa-miR-181b (0.0003) hsa-miR-32 (0.00038) hsa-miR-181a (0.00097) hsa-miR-15a (0.0018)
REACTOME_HOMOLOGOUS_RECOMBINATION_REPAIR	LIG1 TP53BP1 RAD51 BRCA2 RPA3 H2AFX		hsa-miR-24 (0.00095)
REACTOME_IMMUNOREGULATORY_INTERACTIONS_BETWEEN_A_LYMPHOID_AND_A_NON_LYMPHOID_CELL	IGKV1-5 KLRC1 IGKC CD200 CD200R1 C3 VCAM1 LILRA1 CD40 LILRB5 CD34 ICAM2 CD160 AMICA1 KIR2DL2 KLRK1 ITGB1		hsa-miR-29a (0.0039)
REACTOME_THROMBIN_SIGNALLING_THROUGH_PROTEINASE_ACTIVATED_RECEPTORS	GNGT1 GNGT2 GNA15 GNA12 F2RL2 GNG5 GNB2 GNB1 GNB3 F2R		hsa-let-7b (0.0093)
REACTOME_TRANSLATION	RPL18 RPL14 RPL13 RPL15 RPLP2 RPL10 FAU RPL11 RPL12 RPS18 RPS17 RPS14 RPS15 RPS13 RPS11 RPS25 RPS27 RPS29 RPS21 RPS23 RPS24 RPS9 RPS6 RPS5 RPS8 RPS7 RPL41 EIF4A2 EEF1G RPL37 RPL32 RPL31 RPL34 RPL26 RPL27 RPL24 ETF1 RPL29 RPL22 RPL21 EIF5 RPS27A RPL35A RPL6 RPL9 RPL3 RPL5 RPL10A RPL7A RPL4 RPL37A RPS3 RPS3A RPS4X RPS15A RPL13A RPL27A EIF2B1 EEF1B2 EIF3D EIF3G EIF3E EIF3F EIF3K EEF1A1 EIF4B GSPT2	*	hsa-miR-19b (3.5e-23) hsa-miR-142-5p (3.7e-20) hsa-miR-181c (1.9e-15) hsa-miR-376a (5.1e-14) hsa-miR-135b (2.2e-13) hsa-miR-149 (1.1e-11) hsa-miR-181a (2.5e-11) hsa-miR-376b (4.2e-07) hsa-miR-183 (6.3e-07) hsa-miR-181b (1.1e-06) hsa-miR-543 (1.6e-05) hsa-miR-335 (1.8e-05) hsa-miR-33 (1.8e-05) hsa-miR-144 (8.1e-05) hsa-miR-218 (8.4e-05) hsa-miR-15b (0.00013) hsa-miR-16 (0.00023) hsa-miR-101 (0.000…
REACTOME_GS_ALPHA_MEDIATED_EVENTS_IN_GLUCAGON_SIGNALLING	GNG2 GNG7 GNG13 GNG11 GNG10 ADCY3 ADCY4 ADCY8 ADCY5 ADCY6		hsa-miR-19b (1.7e-06) hsa-miR-335 (0.00023) hsa-miR-25 (0.0005) hsa-miR-92 (0.00066) hsa-miR-101 (0.00092) hsa-miR-367 (0.00096) hsa-miR-19a (0.0095)
REACTOME_SCF_SKP2_MEDIATED_DEGRADATION_OF_P27_P21	CCNA2 CCNE2 CCNE1 CDK2 PSMD14 PSMD13 PSMD12 PSMD11 PSMA6 PSMA5 PSMA4 PSMA3 PSMA7 PSMB4 PSMB3 PSMB2 PSMC4 PSMC3 PSMC2 PSMD1 PSMD2 PSMD3 PSMD4 PSMD8 PSME1 PSME2 PSME3 PSMB10	*	hsa-miR-186 (8.2e-15) hsa-miR-146a (6.4e-13) hsa-miR-146b (1.6e-12) hsa-miR-802 (1.1e-11) hsa-miR-302a (1.1e-07) hsa-miR-30c (1.9e-07) hsa-miR-515-5p (1.1e-06) hsa-miR-138 (5.6e-06) hsa-miR-30b (5.1e-05) hsa-miR-212 (0.00021) hsa-miR-765 (0.0004) hsa-miR-34a (0.00087) hsa-miR-7 (0.0016) hsa-miR-302b (0.0089)
REACTOME_VPR_MEDIATED_NUCLEAR_IMPORT_OF_PICS	RAE1 SEH1L NUP188 TPR NUP155 NUP205 NUP214 NUP210 NUP85 NUP98 NUP93 NUP50 NUP62 NUPL1 KPNA1	*	hsa-miR-185 (1.8e-29) hsa-miR-514 (1.2e-11) hsa-miR-125a (4.3e-08) hsa-miR-93 (8.6e-07)
REACTOME_DEPOLARIZATION_OF_THE_PRESYNAPTIC_TERMINAL_TRIGGERS_THE_OPENING_OF_CALCIUM_CHANNELS	CACNB1 CACNB2 CACNB4 CACNA2D1 CACNA2D3 CACNA1A CACNA1B		hsa-miR-181c (2.4e-12) hsa-miR-103 (2e-06) hsa-miR-23b (6.8e-06) hsa-miR-183 (8e-06) hsa-miR-543 (5.7e-05) hsa-miR-181b (0.00062) hsa-miR-181a (0.0011) hsa-miR-101 (0.0031)
REACTOME_PACKAGING_OF_TELOMERE_ENDS	HIST1H4K HIST1H4A HIST1H4B HIST1H4E HIST1H4F HIST1H4I HIST1H4J HIST1H4H H2BFS HIST3H2BB HIST3H3 HIST2H2AA3 HIST1H2BO HIST1H2BM HIST1H2BN HIST1H2BK HIST1H2BL HIST1H2BI HIST1H2BJ HIST2H2AC HIST2H2BE HIST1H2AB HIST1H2AC HIST1H2AD HIST1H2AE HIST1H2BB HIST1H2BD HIST1H2BE HIST1H2BF HIST1H2BG HIST1H2BH HIST1H2AK H2AFZ H2AFX	*	hsa-miR-802 (1.3e-52) hsa-miR-24 (3.1e-15) hsa-miR-544 (0.00094) hsa-miR-9 (0.0071) hsa-miR-584 (0.0096)
REACTOME_SHC_RELATED_EVENTS	HRAS MAPK1 NRAS KRAS YWHAB GRB2 SHC1 MAP2K2	*	hsa-miR-346 (1.4e-09) hsa-miR-217 (1.4e-09) hsa-miR-30b (6.4e-09) hsa-let-7g (9.5e-06) hsa-let-7a (1e-05) hsa-miR-148b (9.1e-05) hsa-let-7b (0.00029) hsa-miR-155 (0.00056) hsa-miR-30c (0.001) hsa-miR-28 (0.0015) hsa-miR-152 (0.0022) hsa-miR-132 (0.0023) hsa-let-7f (0.0051) hsa-miR-190 (0.0081)
REACTOME_CDC6_ASSOCIATION_WITH_THE_ORC:ORIGIN_COMPLEX	E2F2 E2F3 ORC1L CDC6 ORC6L ORC5L ORC2L MCM8	*	hsa-miR-148a (1.9e-09) hsa-miR-125a (4.1e-07) hsa-miR-34a (0.00011) hsa-miR-125b (0.00015) hsa-miR-152 (0.00032) hsa-miR-185 (0.00097) hsa-miR-200a (0.0012) hsa-miR-30c (0.0012) hsa-miR-148b (0.0022) hsa-miR-194 (0.0024) hsa-miR-30e-5p (0.0066)
REACTOME_GAP_JUNCTION_TRAFFICKING	AP2M1 GJB2 CLTB CLTC DNM2 MYO6		hsa-miR-206 (0.0066)
REACTOME_IRS_RELATED_EVENTS	RPS6 FGF7 FGF9 FGF2 PDE3B IRS2 IRS1 TSC1 KL FGF10 FGFR1 EIF4B PIK3R1		hsa-miR-92 (5e-10) hsa-miR-145 (5.6e-09) hsa-miR-181c (1e-08) hsa-miR-181a (4.4e-07) hsa-miR-32 (6e-05) hsa-miR-367 (0.00047) hsa-miR-181b (0.0012) hsa-miR-641 (0.0046)
REACTOME_POST_TRANSLATIONAL_PROTEIN_MODIFICATION	FURIN DOHH DHPS PLAUR GPAA1 DPM2 PIGM PIGC PIGX PIGU PIGT PIGQ PIGO PIGN		hsa-miR-185 (0.0094)
REACTOME_MTOR_SIGNALLING	RPS6 TSC1 EIF4B		hsa-miR-145 (9e-06) hsa-miR-367 (0.00095)
REACTOME_GLUCAGON_SIGNALING_IN_METABOLIC_REGULATION	GNG2 GNG7 GNG13 GNG11 GNG10 PRKAR2B PRKAR1A ADCY3 ADCY4 ADCY8 ADCY5 ADCY6		hsa-miR-92 (3.7e-08) hsa-miR-335 (3.4e-07) hsa-miR-19b (0.0022) hsa-miR-367 (0.0036)
REACTOME_TCR_SIGNALING	PIK3CB HLA-DQA2 HLA-DOA WAS CARD11 HLA-DQB1 ENAH RELA IKBKG IKBKB PDPK1 FYB PIK3R2 VASP RIPK2 EVL PAK2 PAK1 CSK		hsa-miR-30b (1.1e-05) hsa-miR-320 (0.0065)
REACTOME_DNA_REPLICATION_PRE_INITIATION	DBF4 E2F2 E2F3 RPA3 ORC1L CDC7 CDC6 POLA1 POLA2 POLE2 ORC6L ORC5L ORC2L PRIM2 POLE CDT1 PSMD14 PSMD13 PSMD11 MCM10 PSMA6 PSMA4 PSMA3 PSMA7 PSMB4 PSMB3 PSMB2 PSMC4 PSMC2 MCM8 PSMD1 PSMD2 PSMD3 PSMD4 PSMD8 MCM2 MCM3 MCM4 MCM6 PSME1 PSME2 PSME3	*	hsa-miR-186 (2.4e-72) hsa-miR-30b (2.8e-23) hsa-miR-328 (1.2e-22) hsa-miR-185 (3.3e-21) hsa-miR-802 (5.9e-19) hsa-miR-125b (3.8e-16) hsa-miR-515-5p (3.7e-14) hsa-miR-146b (4.1e-14) hsa-miR-555 (4.6e-13) hsa-miR-210 (1.5e-11) hsa-miR-1 (6.8e-11) hsa-miR-125a (2.3e-07) hsa-miR-34a (5.1e-07) hsa-miR-146a (6.4e-06) hsa-miR-148b (1.9e-05) hsa-miR-152 (2.3e-05) hsa-miR-30a-3p (0.00033) hsa-miR-128b (0.…
REACTOME_PYRUVATE_METABOLISM_AND_TCA_CYCLE	LDHB PDK4 SDHD SUCLA2 SUCLG2 SUCLG1		hsa-miR-181c (0.00067) hsa-miR-15a (0.00099)
REACTOME_ADP_SIGNALLING_THROUGH_P2Y_PURINOCEPTOR_12	GNG2 GNG7 GNAI1 GNG13 GNG11 P2RY12		hsa-miR-485-3p (1.8e-07) hsa-miR-19b (9.9e-06) hsa-miR-218 (2.2e-05) hsa-miR-19a (0.0001)
REACTOME_BASE_EXCISION_REPAIR	LIG1 LIG3 NTHL1 FEN1 OGG1 CCNO MPG XRCC1 POLD4 POLD1 POLD2 TDG SMUG1 POLB	*	hsa-let-7b (5.3e-09) hsa-miR-125a (1.9e-06) hsa-miR-30b (0.00069) hsa-miR-30d (0.0019) hsa-miR-30c (0.0089)
REACTOME_NRAGE_SIGNALS_DEATH_THROUGH_JNK	ARHGEF18 ARHGEF16 ARHGEF11 FGD3 PREX1 BAD MAGED1 ARHGEF2 RASGRF1 VAV3 VAV2 TRIO AATF ECT2		hsa-miR-1 (0.00031)
REACTOME_EXTENSION_OF_TELOMERES	LIG1 FEN1 DKC1 RPA3 PCNA RUVBL2 RUVBL1 POLA1 POLA2 POLE2 POLD4 POLD1 POLD2 PRIM2 POLE RFC5 RFC3 RFC4 RFC2	*	hsa-miR-154 (2.5e-14) hsa-miR-217 (1e-13) hsa-miR-1 (1.1e-08) hsa-miR-610 (8e-08) hsa-miR-515-5p (2.6e-05)
REACTOME_REMOVAL_OF_DNA_PATCH_CONTAINING_ABASIC_RESIDUE	NTHL1 FEN1 OGG1 CCNO MPG POLD4 POLD1 POLD2 TDG SMUG1 POLB	*	hsa-miR-30b (1.8e-05) hsa-miR-1 (0.0016) hsa-miR-125a (0.0089)
REACTOME_TRANSLATION_INITIATION_COMPLEX_FORMATION	FAU RPS18 RPS17 RPS14 RPS15 RPS13 RPS11 RPS25 RPS27 RPS29 RPS21 RPS23 RPS24 RPS9 RPS6 RPS5 RPS8 RPS7 EIF4A2 RPS27A RPS3 RPS3A RPS4X RPS15A EIF3D EIF3G EIF3E EIF3F EIF3K EIF4B	*	hsa-miR-142-5p (8.4e-40) hsa-miR-19b (3.9e-33) hsa-miR-145 (5.4e-23) hsa-miR-149 (1.6e-17) hsa-miR-181a (9.4e-17) hsa-miR-543 (1.8e-14) hsa-miR-335 (7.1e-11) hsa-miR-15a (2.3e-09) hsa-miR-183 (9.4e-08) hsa-miR-181c (2.7e-06) hsa-miR-218 (3.5e-05) hsa-miR-19a (5.5e-05) hsa-miR-135b (0.00014) hsa-miR-16 (0.00017) hsa-miR-103 (0.0007) hsa-miR-137 (0.00098)
REACTOME_STRIATED_MUSCLE_CONTRACTION	MYH3 TNNI1 TNNI2 VIM NEB DMD MYBPC2 MYBPC1 TTN TNNT3 MYL2 MYL3 MYL1 TPM2 TPM1		hsa-miR-181c (5.8e-14) hsa-miR-101 (1.4e-06) hsa-miR-137 (2.5e-06)
REACTOME_SIGNALING_BY_PDGF	HRAS MAPK1 SPP1 NRAS FURIN COL5A2 COL5A1 KRAS YWHAB PDGFB GRB2 PIK3R2 MAP2K2 COL1A2 COL1A1 THBS1 THBS2 STAT1 STAT3 SRC		hsa-let-7f (0.0007) hsa-miR-320 (0.0015) hsa-miR-148a (0.0027) hsa-let-7a (0.0037)
REACTOME_CELL_CYCLE_CHECKPOINTS	RAD1 DBF4 MAD1L1 ANAPC2 ANAPC7 HUS1 CLSPN ATRIP UBE2C MDM2 RPA3 ORC1L CCNE2 CCNE1 CDC7 CDC6 BUB3 CCNB1 CCNB2 ORC6L RFWD2 ORC5L ORC2L CDC25C CDC25A MAD2L1 RFC4 RFC2 CHEK1 CDC20 PSMD14 PSMD13 PSMD11 MCM10 PSMA6 PSMA4 PSMA3 ANAPC11 PSMA7 PSMB4 PSMB3 PSMB2 PSMC4 PSMC2 MCM8 PSMD1 PSMD2 PSMD3 PSMD4 PSMD8 MCM2 MCM3 MCM4 MCM6 PSME1 PSME2 BUB1B PSME3	*	hsa-miR-30b (6.3e-53) hsa-miR-186 (5.5e-33) hsa-miR-138 (3.1e-20) hsa-miR-146b (5.3e-16) hsa-miR-802 (1.3e-14) hsa-miR-643 (2.1e-10) hsa-miR-30a-3p (6.1e-09) hsa-miR-30e-3p (6e-08) hsa-miR-767-3p (1.1e-06) hsa-miR-146a (1.4e-06) hsa-miR-515-5p (1.8e-06) hsa-miR-555 (2.2e-06) hsa-let-7b (1.4e-05) hsa-let-7a (0.00023) hsa-miR-26b (0.00069) hsa-miR-30e-5p (0.0008) hsa-let-7f (0.00086) hsa-miR-503 (0…
REACTOME_PLATELET_DEGRANULATION	A2M F8 SERPING1 GAS6 SELP IGF1 FGA EGF PF4 FIGF CFD VEGFC CD36 PPBP TF CALM1 PDGFA MMRN1 TTN CLU ALB SRGN HABP4 TLN1 PROS1 SCG3 HRG VWF		hsa-miR-101 (1e-14) hsa-miR-144 (1.7e-13) hsa-miR-106b (2e-07) hsa-miR-770-5p (3.4e-05) hsa-miR-20b (0.0011) hsa-miR-130a (0.0059)
REACTOME_FORMATION_OF_FIBRIN_CLOT_CLOTTING_CASCADE	A2M F8 SERPING1 F7 F3 TFPI PF4V1 KLKB1 THBD PRCP FGA FGB KNG1 PF4 F10 F13B PROS1 VWF		hsa-miR-101 (3.5e-24) hsa-miR-19b (1.2e-17) hsa-miR-19a (1.9e-16) hsa-miR-144 (4.8e-05) hsa-miR-29b (0.0041)
REACTOME_PLC_BETA_MEDIATED_EVENTS	PDE1C PDE1A PRKAR2B ADCY3 ADCY4 ADCY8 PLA2G4A ITPR1 ITPR2 CALM1 PLCB1		hsa-miR-19b (5.5e-15) hsa-miR-92 (2.6e-10) hsa-miR-335 (3e-07) hsa-miR-92b (4.9e-05) hsa-miR-130a (6.1e-05) hsa-miR-32 (7.6e-05) hsa-miR-25 (0.0013) hsa-miR-103 (0.0013) hsa-miR-770-5p (0.0019) hsa-miR-16 (0.0066)
REACTOME_CHYLOMICRON_MEDIATED_LIPID_TRANSPORT	APOA4 APOB HSPG2 LPL LIPC		hsa-miR-149 (0.003)
REACTOME_GOLGI_ASSOCIATED_VESICLE_BIOGENESIS	ARF1 TFRC VAMP8 GAK TPD52 RAB5C CLTC TGOLN2 AP1S3 AP1S1 DNM2 AP1G1 IGF2R AP1M1 AP1M2 AP1B1 AP3B1 NAPA		hsa-miR-148a (5.9e-06) hsa-miR-299-3p (2.8e-05) hsa-miR-30b (3.1e-05) hsa-miR-320 (5.6e-05) hsa-miR-125b (0.00018) hsa-miR-152 (0.00065) hsa-miR-30c (0.0021) hsa-miR-9 (0.0024) hsa-miR-138 (0.0027) hsa-miR-30e-5p (0.0027)
REACTOME_NOREPINEPHRINE_NEUROTRANSMITTER_RELEASE_CYCLE	MAOA SNAP25 VAMP2 STXBP1		hsa-miR-130b (7.6e-06) hsa-miR-218 (2.6e-05) hsa-miR-92 (0.0024) hsa-miR-130a (0.0027)
REACTOME_CELLEXTRACELLULAR_MATRIX_INTERACTIONS	ARHGEF6 FLNC PARVA PXN LIMS2 ITGB1		hsa-miR-145 (6.4e-13) hsa-miR-218 (8.2e-11) hsa-miR-183 (3.8e-09) hsa-miR-19b (1.1e-05) hsa-miR-29b (0.0014) hsa-miR-19a (0.0016)
REACTOME_AUTODEGRADATION_OF_CDH1_BY_CDH1_APC	ANAPC2 ANAPC7 UBE2C PSMD14 PSMD13 PSMD11 PSMA6 PSMA4 PSMA3 FZR1 ANAPC11 PSMA7 PSMB4 PSMB3 PSMB2 PSMC4 PSMC2 PSMD1 PSMD2 PSMD3 PSMD4 PSMD8 PSME1 PSME2 PSME3	*	hsa-miR-802 (7.8e-10) hsa-miR-186 (1.9e-08) hsa-miR-30b (9.9e-08) hsa-miR-146b (2.9e-06) hsa-miR-146a (0.0012) hsa-miR-620 (0.0027) hsa-miR-515-5p (0.0082)
REACTOME_SYNTHESIS_OF_DNA	LIG1 FEN1 RPA3 CCNA2 ORC1L PCNA CDC6 POLA1 POLA2 POLE2 ORC6L GINS1 GINS2 GINS4 POLD4 POLD1 POLD2 CDK2 ORC5L ORC2L PRIM2 POLE RFC5 RFC3 RFC4 RFC2 CDT1 PSMD14 PSMD13 PSMD12 PSMD11 PSMA6 PSMA4 PSMA3 FZR1 PSMA7 PSMB4 PSMB3 PSMB2 PSMC4 PSMC3 PSMC2 MCM8 PSMD1 PSMD2 PSMD3 PSMD4 PSMD8 MCM2 MCM3 MCM4 MCM5 MCM6 PSME1 PSME2 PSME3 PSMB10	*	hsa-miR-802 (1.8e-22) hsa-miR-555 (3.2e-17) hsa-miR-186 (1.1e-16) hsa-miR-146b (1.2e-14) hsa-miR-185 (2.3e-10) hsa-miR-515-5p (1.5e-09) hsa-miR-30b (8.9e-08) hsa-miR-206 (2.6e-06) hsa-miR-30c (7.6e-06) hsa-miR-767-3p (1.4e-05) hsa-miR-1 (4.3e-05) hsa-miR-328 (0.00032) hsa-miR-132 (0.00044) hsa-miR-212 (0.0018) hsa-miR-620 (0.0024) hsa-miR-765 (0.004) hsa-miR-146a (0.0071) hsa-miR-30a-5p (0.0091)
REACTOME_ADENYLATE_CYCLASE_ACTIVATING_PATHWAY	GNAL ADCY3 ADCY4 ADCY8 ADCY5 ADCY6		hsa-miR-335 (2.6e-08) hsa-miR-92 (6.9e-07) hsa-miR-19b (0.00068) hsa-miR-92b (0.0045)
REACTOME_PHASE_1_FUNCTIONALIZATION_OF_COMPOUNDS	PTGS2 MAOA MAOB FMO2 ADH1C ADH1B ADH1A CYP2U1 ALDH1A1 ADH4 CYP3A4 CYP3A5 CYP3A7 CYP39A1 PTGIS ALDH2 CYP11A1 CYP26B1	*	hsa-miR-149 (2.4e-36) hsa-miR-144 (1.5e-31) hsa-miR-101 (9.6e-31) hsa-miR-15b (5.7e-16) hsa-miR-15a (1.1e-08) hsa-miR-20a (1.9e-08) hsa-miR-16 (0.009)
REACTOME_DNA_STRAND_ELONGATION	LIG1 FEN1 RPA3 PCNA POLA1 POLA2 GINS1 GINS2 GINS4 POLD4 POLD1 POLD2 PRIM2 RFC5 RFC3 RFC4 RFC2 MCM8 MCM2 MCM3 MCM4 MCM5 MCM6	*	hsa-miR-154 (3.8e-19) hsa-miR-1 (4.7e-11) hsa-miR-217 (4.6e-09) hsa-miR-206 (0.0015)
REACTOME_RNA_POLYMERASE_I_TRANSCRIPTION_INITIATION	EHMT2 UBTF ERCC3 ERCC2 RRN3 GTF2H4 GTF2H3 CDK7 POLR1A POLR1B POLR2H POLR2K		hsa-miR-496 (0.0076)
REACTOME_G_ALPHA_12_13_SIGNALLING_EVENTS	RAC2 RAC1 ARHGEF18 ARHGEF16 ARHGEF11 GNA12 FGD3 PREX1 MCF2L ARHGEF2 ARHGEF1 RASGRF1 VAV3 VAV2 CDC42 RHOC RHOG TRIO ECT2		hsa-miR-132 (0.0078)
REACTOME_APOPTOSIS_INDUCED_DNA_FRAGMENTATION	HIST1H1E HIST1H1D HIST1H1C HIST1H1B DFFA DFFB CASP3 H1F0 KPNB1 KPNA1		hsa-miR-152 (1.5e-06) hsa-miR-302a (3.4e-06) hsa-miR-155 (2.6e-05) hsa-let-7b (0.00012) hsa-miR-148b (0.00019) hsa-miR-30b (0.0039)
REACTOME_PLATELET_ACTIVATION	A2M GNG2 GNG7 F8 SERPING1 GNAI1 GAS6 GNG13 GNG11 DGKB SELP IGF1 DGKI P2RY12 GNG10 FGA EGF P2RX1 PF4 FIGF CFD VEGFC CD36 PPBP PLA2G4A TF ITPR1 ITPR2 FYN CALM1 PDGFA MMRN1 TTN CLU ALB SRGN PLCG2 HABP4 TLN1 MGLL AKT3 PRKCA PROS1 SCG3 HRG PIK3R1 VWF		hsa-miR-181c (1.1e-14) hsa-miR-144 (7.3e-09) hsa-miR-20a (4.6e-05) hsa-miR-218 (0.00018) hsa-miR-19a (0.00083) hsa-miR-130b (0.0016) hsa-miR-106b (0.0021) hsa-miR-485-3p (0.0039) hsa-miR-130a (0.0043)
REACTOME_CELL_JUNCTION_ORGANIZATION	CTNNB1 PVRL3 ARHGEF6 FLNC PARVA CDH12 CDH13 CDH10 CLDN8 CLDN5 CLDN2 CDH3 CDH4 CDH6 COL17A1 CDH9 LAMC2 PXN LAMB3 LAMA3 PARD3 LIMS2 CLDN19 CLDN10 CLDN11 CLDN23 DST ITGB4 ITGB1 PARD6G		hsa-miR-92 (1.3e-16) hsa-miR-367 (1.2e-15) hsa-miR-32 (1.5e-11) hsa-miR-181a (7.6e-10) hsa-miR-137 (1.3e-08) hsa-miR-145 (3e-08) hsa-miR-183 (2.6e-06) hsa-miR-768-3p (4.5e-06) hsa-miR-218 (0.00014) hsa-miR-424 (0.00057) hsa-miR-181c (0.0014) hsa-miR-106b (0.0018) hsa-miR-20a (0.0078)
REACTOME_P75_NTR_RECEPTOR_MEDIATED_SIGNALLING	RAC1 ARHGEF18 ARHGEF16 ARHGEF11 RELA FGD3 ARHGDIA HDAC1 IKBKB PREX1 CASP3 CASP2 BAD MYD88 PSENEN MCF2L IRAK1 PRKCI MAGED1 SORCS3 ARHGEF2 ARHGEF1 RASGRF1 VAV3 VAV2 APH1A SMPD2 TRIO PSEN1 PSEN2 SQSTM1 AATF RIPK2 ECT2		hsa-miR-9 (1.2e-05) hsa-miR-34a (0.0001) hsa-miR-146b (0.00032) hsa-miR-146a (0.0016) hsa-miR-133b (0.0069) hsa-miR-133a (0.0093)
REACTOME_SHC_MEDIATED_SIGNALLING	HRAS MAPK1 NRAS KRAS YWHAB GRB2 SHC1 MAP2K2	*	hsa-miR-217 (2.1e-12) hsa-let-7f (2.7e-11) hsa-miR-155 (8.2e-06) hsa-miR-148a (1.2e-05) hsa-miR-30b (0.00018) hsa-miR-132 (0.00051) hsa-miR-346 (0.001) hsa-miR-148b (0.0011) hsa-let-7b (0.0026) hsa-miR-30c (0.0077)
REACTOME_APOPTOTIC_EXECUTION_PHASE	HIST1H1D HIST1H1C HIST1H1B PTK2 CASP6 CASP3 DBNL LMNB1 CLSPN OCLN PRKCD STK24 PAK2 KPNB1 KPNA1		hsa-let-7b (0.00023) hsa-miR-30c (0.0069)
REACTOME_HIV_INFECTION	RAE1 LIG1 RAC1 ARF1 AP2S1 TAF10 TAF13 TAF12 FEN1 SSRP1 NCBP2 NCBP1 AP2M1 CCR5 BANF1 SUPT16H AP2B1 SEH1L CTDP1 AP2A2 PACS1 TH1L PPIA NUP188 CXCR4 RANBP1 TPR ERCC2 NUP155 XRCC4 RANGAP1 RDBP AP1S3 AP1S1 GTF2H4 GTF2H3 NUP205 NUP214 NUP210 TCEB2 TCEB3 TCEB1 XPO1 RNMT AP1G1 BTRC GTF2E1 DOCK2 TAF1 TAF4 TAF5 WHSC2 GTF2A1 ATP6V1H NUP85 CDK7 AP1M1 NUP98 AP1M2 NUP93 HCK ELL NUP50 NUP62 AP1B1 RNGTT POLR2H PO…	*	hsa-miR-186 (5.7e-24) hsa-miR-148a (7.8e-19) hsa-miR-132 (8.6e-15) hsa-miR-146a (8.3e-13) hsa-miR-30b (7.7e-12) hsa-miR-146b (2.6e-10) hsa-miR-152 (5e-08) hsa-miR-802 (6.9e-08) hsa-miR-328 (9.4e-07) hsa-miR-320 (2.3e-06) hsa-miR-148b (2e-05) hsa-miR-200a (2.3e-05) hsa-miR-125b (5.1e-05) hsa-miR-496 (8.9e-05) hsa-miR-555 (0.00014) hsa-miR-299-3p (0.00017) hsa-miR-30c (0.00031) hsa-miR-212 (0.00034…
REACTOME_CHOLESTEROL_BIOSYNTHESIS	PMVK DHCR7 GGPS1 NSDHL SQLE HSD17B7 DHCR24		hsa-miR-205 (0.00069)
REACTOME_SEROTONIN_RECEPTORS	HTR1B HTR1E HTR5A HTR2B HTR2C HTR2A HTR4 HTR7		hsa-miR-23b (6.5e-09) hsa-miR-218 (0.0026) hsa-miR-15b (0.0087)
REACTOME_P38MAPK_EVENTS	HRAS NRAS RALA MAPKAPK3 MAPKAPK2 KRAS RALGDS MAPK12 MAPK13 SRC		hsa-miR-1 (5.8e-09) hsa-miR-217 (2.9e-07) hsa-let-7a (2.9e-05) hsa-miR-30b (0.00011) hsa-let-7f (0.00012) hsa-let-7i (0.0091)
REACTOME_ADHERENS_JUNCTIONS_INTERACTIONS	CTNNB1 PVRL3 CDH12 CDH13 CDH10 CDH3 CDH4 CDH6 CDH9		hsa-miR-367 (2.4e-14) hsa-miR-183 (1.8e-06)
REACTOME_SEMA3A_PLEXIN_REPULSION_SIGNALING_BY_INHIBITING_INTEGRIN_ADHESION	FES SEMA3A FYN		hsa-miR-92 (1.7e-16) hsa-miR-145 (1.3e-11) hsa-miR-32 (2.2e-07) hsa-miR-586 (0.0015)
REACTOME_CELL_CYCLE_MITOTIC	PPP2R5D INCENP LIG1 RCC2 ZWINT AHCTF1 NDC80 TSGA14 FEN1 CSNK1D SSNA1 DBF4 KNTC1 TUBG1 ERCC6L TFDP1 KIF23 E2F2 MAD1L1 E2F3 E2F5 KIF2C NDE1 AURKA AURKB ANAPC2 TUBA4A ANAPC7 NEK2 FBXO5 ALMS1 CEP250 SEH1L DSN1 CETN2 BIRC5 YWHAG KIF20A CEP78 PKMYT1 RAD21 FGFR1OP SPC25 UBE2C APITD1 RPA3 TYMS MLF1IP TUBGCP2 TUBB2C RANGAP1 CDCA8 ORC1L PCNT NUF2 PCNA CCNE2 CCNE1 CDC7 CDC6 CCND1 RRM2 POLA1 POLA2 BUB1 BUB3 …	*	hsa-miR-146b (1.1e-19) hsa-miR-186 (1.8e-19) hsa-miR-802 (3.8e-12) hsa-let-7f (3.7e-10) hsa-miR-496 (4e-10) hsa-miR-30b (1.1e-08) hsa-miR-152 (1.9e-08) hsa-miR-148b (5.9e-08) hsa-miR-555 (2e-07) hsa-miR-328 (3.5e-07) hsa-miR-302c (2.5e-06) hsa-let-7b (4.5e-06) hsa-miR-132 (8e-06) hsa-miR-200a (1.2e-05) hsa-miR-185 (1.4e-05) hsa-miR-620 (2.1e-05) hsa-miR-302a (5.9e-05) hsa-miR-146a (9.4e-05) hsa-m…
REACTOME_DNA_REPAIR	LIG1 LIG3 XAB2 NTHL1 FANCD2 FEN1 OGG1 PALB2 DDB1 TP53BP1 ZBTB32 FANCI FANCF FANCG FANCA CCNO FANCB FANCC RAD51 BRCA2 BRCA1 UBE2T PRKDC RPA3 ERCC4 ERCC1 ERCC2 MPG XRCC4 XRCC1 PCNA GTF2H4 GTF2H3 POLE2 POLD4 POLD1 POLD2 TDG NBN CDK7 SMUG1 H2AFX POLE POLB RFC5 RFC3 RFC4 RFC2 MAD2L2 POLR2H POLR2G POLR2K POLR2J POLR2I POLR2D TDP1	*	hsa-miR-496 (4.5e-12) hsa-miR-154 (4.3e-07) hsa-miR-217 (9.1e-07) hsa-miR-30b (9.1e-06) hsa-miR-1 (0.00021) hsa-miR-30d (0.0016) hsa-miR-30c (0.007)
REACTOME_BRANCHED_CHAIN_AMINO_ACID_CATABOLISM	AUH ACAD8 HIBADH ACAT1 MCCC1 BCKDHB HIBCH		hsa-miR-19a (9e-07) hsa-miR-19b (4.6e-06) hsa-miR-23b (1.2e-05)
REACTOME_CAM_PATHWAY	PDE1C PDE1A PRKAR2B PRKAR1A ADCY3 ADCY4 ADCY8 ADCY5 ADCY6 CALM1		hsa-miR-335 (3.8e-10) hsa-miR-92 (7.1e-09) hsa-miR-19b (1.6e-05) hsa-miR-101 (2.1e-05) hsa-miR-367 (0.00017) hsa-miR-25 (0.00041) hsa-miR-218 (0.00068) hsa-miR-92b (0.0022) hsa-miR-133a (0.0041) hsa-miR-770-5p (0.0047)
REACTOME_METABLISM_OF_NUCLEOTIDES	ADSS SLC29A2 GART DGUOK TXN CAD IMPDH1 TXNRD1 ATIC NT5C3 PPAT TK1 APRT AK2 TYMS NME4 NME1 RRM2 RRM1 CTPS2 DCK NT5M GMPS HPRT1 PAICS CTPS DTYMK GUK1 GSR UCK2		hsa-miR-125b (1.7e-10) hsa-miR-148b (1.5e-06) hsa-let-7f (0.00064) hsa-miR-148a (0.0022) hsa-miR-125a (0.0023)
REACTOME_FORMATION_OF_THE_TERNARY_COMPLEX_AND_SUBSEQUENTLY_THE_43S_COMPLEX	FAU RPS18 RPS17 RPS14 RPS15 RPS13 RPS11 RPS25 RPS27 RPS29 RPS21 RPS23 RPS24 RPS9 RPS6 RPS5 RPS8 RPS7 RPS27A RPS3 RPS3A RPS4X RPS15A EIF3D EIF3G EIF3E EIF3F EIF3K	*	hsa-miR-218 (2.2e-29) hsa-miR-142-5p (1.9e-26) hsa-miR-137 (4.2e-15) hsa-miR-135b (4.2e-12)
REACTOME_REMOVAL_OF_THE_FLAP_INTERMEDIATE	FEN1 RPA3 PCNA POLA1 POLA2 POLD4 POLD1 PRIM2		hsa-miR-1 (5.9e-09) hsa-miR-154 (1.2e-08) hsa-miR-610 (0.004) hsa-miR-217 (0.0059)
REACTOME_COPI_MEDIATED_TRANSPORT	ARF1 ARFGAP1 COPA COPG COPE COPB2 COPB1 COPZ1	*	hsa-miR-142-3p (0.00017) hsa-miR-138 (0.0066)
REACTOME_METABOLISM_OF_MRNA	PABPC1 PAIP1 EDC3 DDX6 TNKS1BP1 LSM5 LSM4 LSM2 LSM1 EXOSC4 CNOT10 EXOSC5 EXOSC3 RQCD1 CNOT3 CNOT6 DCPS DCP2 PARN EIF4G1		hsa-miR-802 (2.7e-11) hsa-miR-125a (2.6e-07) hsa-miR-30b (0.00057) hsa-miR-186 (0.00095) hsa-miR-125b (0.0018) hsa-miR-152 (0.0028) hsa-miR-302b (0.0033) hsa-miR-148b (0.0056) hsa-miR-302c (0.0074)
REACTOME_CYCLIN_A1_ASSOCIATED_EVENTS_DURING_G2_M_TRANSITION	PKMYT1 CCNB1 CCNB2 PLK1 CDK7 CDC25C CDC25A CDC25B		hsa-miR-496 (2.2e-06) hsa-miR-148a (0.00023) hsa-miR-152 (0.004)
REACTOME_G2_M_CHECKPOINTS	RAD1 DBF4 HUS1 CLSPN ATRIP RPA3 ORC1L CDC7 CDC6 CCNB1 CCNB2 ORC6L CDK2 ORC5L ORC2L CDC25C CDC25A RFC5 RFC3 RFC4 RFC2 CHEK1 CHEK2 MCM10 MCM8 MCM2 MCM3 MCM4 MCM5 MCM6	*	hsa-miR-185 (2.6e-14) hsa-let-7b (1.6e-11) hsa-let-7f (4.8e-11) hsa-miR-30c (6e-10) hsa-miR-30b (3e-09) hsa-miR-128b (3.2e-08) hsa-miR-643 (9.9e-08) hsa-miR-30e-3p (0.00047) hsa-miR-186 (0.0018) hsa-miR-302b (0.0032)
REACTOME_FORMATION_OF_THE_EARLY_ELONGATION_COMPLEX	NCBP2 NCBP1 CTDP1 TH1L RDBP GTF2H3 CDK7 POLR2H POLR2G POLR2K POLR2J POLR2I POLR2D		hsa-miR-496 (1.9e-09)
REACTOME_APOPTOSIS	BCL2L1 HIST1H1D HIST1H1C HIST1H1B FADD PTK2 TFDP1 CASP6 CASP3 BAD DBNL LMNB1 CLSPN BID YWHAB OCLN PMAIP1 BMF PRKCD DIABLO STK24 TRAF2 BAK1 PSMD14 PSMD13 PSMD11 PSMA6 PSMA4 PSMA3 PSMA7 PSMB4 PSMB3 PSMB2 PSMC4 BBC3 PSMC2 AKT1 PAK2 PSMD1 PSMD2 PSMD3 PSMD4 KPNB1 PSMD8 PSME1 PSME2 PSME3 KPNA1		hsa-miR-148a (2.3e-12) hsa-miR-30b (2e-09) hsa-miR-802 (1.3e-07) hsa-miR-328 (9.1e-07) hsa-miR-186 (1.1e-05) hsa-miR-555 (5.8e-05) hsa-miR-146a (0.00011) hsa-miR-152 (0.00094) hsa-miR-9 (0.0011) hsa-miR-146b (0.0016) hsa-let-7a (0.0016) hsa-let-7b (0.0044) hsa-miR-30c (0.0079)
REACTOME_ENERGY_DEPENDENT_REGULATION_OF_MTOR_BY_LKB1_AMPK	TSC1		hsa-miR-367 (0.004)
REACTOME_TIE2_SIGNALING	HRAS NRAS KRAS GRB2 SHC1 PIK3R2		hsa-let-7b (0.00048)
REACTOME_GAB1_SIGNALOSOME	EGFR PXN PIK3R1		hsa-miR-218 (9.8e-11) hsa-miR-145 (6.3e-09)
REACTOME_DIABETES_PATHWAYS	RPL14 RPL13 RPL15 FAU GNG2 RPL11 RPL12 GNG7 RPS17 RPS14 RPS13 GNAI1 CACNB2 RPS25 RPS29 RPS6 RPS5 RPS8 RPS7 GNG13 GNG11 RPL32 RPL31 RPL34 SNAP25 ETFB EXOC1 ETFA RPL26 IGF1 RPL27 IGF2 RPL29 RPL22 RPL21 SDHD PRKAR2B RPS27A RPL35A VAMP2 RPL9 ADRA2A RPL3 ADRA2C RPL5 RPL10A RPL4 HERPUD1 KCNB1 IDH3A DNAJB9 ATF3 CACNA1C CACNA1A PC NDUFS4 RPS3A SUCLA2 STXBP1 RPS4X CHRM3 PKLR LEP ADCY8 RAPGEF3 SUCLG2 SUCLG…		hsa-miR-424 (9.3e-11) hsa-miR-181c (4.3e-07) hsa-miR-218 (7.4e-06) hsa-miR-20a (8.2e-05) hsa-miR-142-5p (0.00011) hsa-miR-375 (0.0051) hsa-miR-183 (0.0054)
REACTOME_GENERATION_OF_SECOND_MESSENGER_MOLECULES	HLA-DQA2 HLA-DOA WAS HLA-DQB1 ENAH FYB VASP EVL PAK2 PAK1		hsa-miR-9 (0.0091)
REACTOME_INFLUENZA_LIFE_CYCLE	RPL18 RPL14 RPL13 RPL15 RPLP2 RPL10 FAU RPL11 RPL12 RPS18 RPS17 RPS14 RPS15 RPS13 RPS11 RPS25 RPS27 RPS29 RPS21 RPS23 RPS24 RPS9 RPS6 RPS5 RPS8 RPS7 RPL41 RPL37 RPL32 RPL31 RPL34 RPL26 RPL27 RPL24 RPL29 RPL22 RPL21 RPS27A RPL35A RPL6 RPL9 RPL3 RPL5 RPL10A RPL7A RPL4 RPL37A RPS3 RPS3A RPS4X RPS15A RPL13A NUP54 RPL27A POLR2A POM121		hsa-miR-142-5p (7.4e-13) hsa-miR-218 (5.3e-10) hsa-miR-23b (4.4e-09) hsa-miR-181c (4.5e-07) hsa-miR-376a (3e-06) hsa-miR-376b (0.00017) hsa-miR-16 (0.003) hsa-miR-181a (0.006)
REACTOME_ERK_MAPK_TARGETS	MEF2C MEF2A PPP2CB RPS6KA5 RPS6KA3 DUSP6 PPP2R1B		hsa-miR-145 (9.2e-23) hsa-miR-23b (6.4e-09) hsa-miR-20a (1e-05) hsa-miR-183 (4.2e-05) hsa-miR-92 (0.00014) hsa-miR-142-5p (0.00017) hsa-miR-19b (0.0027)
REACTOME_ACTIVATED_AMPK_STIMULATES_FATTY_ACID_OXIDATION_IN_MUSCLE	ACACB ACSL1		hsa-miR-130a (0.00078) hsa-miR-218 (0.0055)
REACTOME_REGULATION_OF_INSULIN_LIKE_GROWTH_FACTOR_ACTIVITY_BY_INSULIN_LIKE_GROWTH_FACTOR_BINDING_PROTEINS	IGF1 IGF2 KLK3 IGFBP6 IGFBP1 IGFBP3		hsa-miR-19b (1.9e-13) hsa-miR-19a (0.00022)
REACTOME_CHEMOKINE_RECEPTORS_BIND_CHEMOKINES	CCL28 CCL27 CCL21 CCBP2 CCL19 CCL16 CXCL12 CCL2 CX3CL1 XCL2 CCRL1 PF4 PPBP CCR3 CX3CR1 XCR1 CXCL1 CXCL3 CXCL2 CXCL6 CXCR7		hsa-miR-142-5p (8e-19) hsa-miR-23b (6.2e-13) hsa-miR-15a (0.00011) hsa-miR-101 (0.00038) hsa-miR-144 (0.00073)
REACTOME_FORMATION_OF_PLATELET_PLUG	A2M GNG2 GNG7 F8 SERPING1 GNAI1 GAS6 GNG13 GNG11 DGKB SOS1 SELP IGF1 DGKI P2RY12 GNG10 FGA ADRA2A ADRA2C EGF P2RX1 PF4 FIGF RAPGEF3 CFD VEGFC CD36 PPBP PLA2G4A TF ITPR1 ITPR2 FYN CALM1 PDGFA MMRN1 TTN CLU ITGB1 ALB SRGN PLCG2 HABP4 RAP1A TLN1 MGLL AKT3 PRKCA PROS1 RASGRP2 SCG3 HRG PIK3R1 VWF		hsa-miR-130a (4.5e-07) hsa-miR-218 (6.4e-06) hsa-miR-144 (1.9e-05) hsa-miR-367 (4.7e-05) hsa-miR-301 (5.8e-05) hsa-miR-181c (7.3e-05) hsa-miR-92 (0.00016) hsa-miR-149 (0.0012) hsa-miR-15b (0.0027) hsa-miR-424 (0.0036) hsa-miR-130b (0.0059) hsa-miR-20a (0.0073) hsa-miR-20b (0.0091)
REACTOME_RNA_POLYMERASE_I_CHAIN_ELONGATION	HIST1H3J HIST1H3A HIST1H3B HIST1H3E HIST1H3F HIST1H3G HIST1H3H HIST1H3I UBTF H3F3A GTF2H3 CDK7 POLR1B POLR2H POLR2K	*	hsa-miR-496 (3e-35)
REACTOME_CYTOSOLIC_TRNA_AMINOACYLATION	GARS HARS FARSB FARSA CARS TARS YARS MARS VARS EPRS NARS LARS		hsa-miR-205 (3.7e-06)
REACTOME_PLATELET_ADHESION_TO_EXPOSED_COLLAGEN	CD36 FYN ITGB1 VWF		hsa-miR-29a (0.00071)
REACTOME_REGULATION_OF_GENE_EXPRESSION_IN_BETA_CELLS	RPL18 RPL14 RPL13 RPL15 RPLP2 RPL10 FAU RPL11 RPL12 HNF4G RPS18 HNF4A RPS17 RPS14 RPS15 RPS13 RPS11 RPS25 RPS27 RPS29 RPS21 RPS23 RPS24 RPS9 RPS6 RPS5 RPS8 RPS7 HNF1A RPL41 RPL35 RPL37 RPL38 RPL32 RPL31 RPL34 RPL26 RPL27 RPL24 RPL29 RPL23 RPL22 RPL21 SLC2A2 RPS27A RPL35A RPL6 RPL9 RPL3 RPL5 RPL10A RPL7A RPL4 RPL37A PAX6 RPS3 RPS3A RPS4X PKLR RPS15A RPL13A RPL27A FOXO1 AKT3	*	hsa-miR-142-5p (1.3e-59) hsa-miR-376b (5.2e-43) hsa-miR-376a (1.6e-37) hsa-miR-181c (2.7e-22) hsa-miR-23b (1.3e-14) hsa-miR-15b (4.4e-09) hsa-miR-218 (6.1e-08) hsa-miR-137 (2.2e-07) hsa-miR-29b (7.9e-06) hsa-miR-16 (1e-05) hsa-miR-20b (2.9e-05) hsa-miR-365 (0.00094) hsa-miR-20a (0.001) hsa-miR-29c (0.001) hsa-miR-23a (0.0018) hsa-miR-106b (0.0057) hsa-miR-15a (0.0067) hsa-miR-150 (0.0094)
REACTOME_AXON_GUIDANCE	HRAS MAPK1 CACNB3 PFN1 PFN2 RAC2 RAC1 ARHGEF11 NRAS GSK3B PTK2 ABL2 COL5A2 COL5A1 SEMA7A FARP2 RND1 CDK5R1 CD72 KRAS CAP1 ARTN SEMA4D YWHAB ROBO2 PLXNC1 GRB2 SPTBN2 CFL1 ERBB2 MAP2K2 COL6A3 COL1A2 COL1A1 CACNA1I CACNA1H CACNA1D CDC42 RHOC GPC1 RHOG LIMK1 CDK5 VASP TREM2 AGRN SRC EVL PAK2 PAK1 GRLF1		hsa-miR-148a (0.0011)
REACTOME_REGULATION_OF_APC_ACTIVATORS_BETWEEN_G1_S_AND_EARLY_ANAPHASE	ANAPC2 ANAPC7 FBXO5 UBE2C BUB3 CCNB1 PLK1 MAD2L1 CDC20 PSMD14 PSMD13 PSMD11 PSMA6 PSMA4 PSMA3 FZR1 ANAPC11 PSMA7 PSMB4 PSMB3 PSMB2 PSMC4 PSMC2 PSMD1 PSMD2 PSMD3 PSMD4 PSMD8 PSME1 PSME2 BUB1B PSME3	*	hsa-miR-802 (1.6e-43) hsa-miR-186 (8.8e-13) hsa-miR-146b (1.3e-08) hsa-miR-146a (2.4e-06) hsa-miR-30b (2.3e-05) hsa-miR-620 (2.9e-05) hsa-miR-603 (0.0016) hsa-miR-515-5p (0.0024) hsa-miR-30d (0.0025) hsa-miR-765 (0.0063)
REACTOME_MITOTIC_M_M_G1_PHASES	PPP2R5D RCC2 ZWINT AHCTF1 NDC80 KNTC1 ERCC6L KIF23 E2F2 MAD1L1 E2F3 KIF2C NDE1 AURKB FBXO5 SEH1L DSN1 BIRC5 KIF20A RAD21 SPC25 APITD1 MLF1IP RANGAP1 CDCA8 ORC1L NUF2 CDC6 BUB1 BUB3 ORC6L PLK1 SEC13 NUP85 ORC5L NUP98 ORC2L MAD2L1 CDC20 PMF1 CDT1 PSMD14 PSMD13 PSMD11 SGOL2 SGOL1 PSMA6 PSMA4 PSMA3 PSMA7 PSMB4 PSMB3 PSMB2 CKAP5 CASC5 PSMC4 PSMC2 MCM8 PSMD1 PSMD2 PSMD3 PSMD4 PSMD8 MCM2 MCM3 MCM4 MCM6 …	*	hsa-miR-186 (4.1e-38) hsa-miR-328 (7.5e-34) hsa-miR-146b (9.1e-22) hsa-miR-30b (8.4e-16) hsa-miR-125b (2.4e-15) hsa-miR-148a (2.1e-13) hsa-miR-767-3p (1.3e-10) hsa-miR-555 (2.5e-10) hsa-miR-146a (1.6e-09) hsa-miR-802 (2e-09) hsa-miR-515-5p (4.4e-07) hsa-miR-34a (6.8e-07) hsa-miR-148b (1.4e-06) hsa-miR-30d (4.8e-06) hsa-miR-185 (9e-06) hsa-miR-643 (9.6e-06) hsa-miR-152 (2.5e-05) hsa-miR-200a (0.00…
REACTOME_RNA_POLYMERASE_I_PROMOTER_ESCAPE	UBTF ERCC3 ERCC2 RRN3 GTF2H4 GTF2H3 CDK7 POLR1A POLR1B POLR2H POLR2K		hsa-miR-496 (0.0073)
REACTOME_SIGNALING_BY_TGF_BETA	TGFBR2 SMAD4 SMAD3 ZFYVE9		hsa-miR-19b (5.3e-06)
REACTOME_REV_MEDIATED_NUCLEAR_EXPORT_OF_HIV1_RNA	RAE1 SEH1L NUP188 TPR NUP155 RANGAP1 NUP205 NUP214 NUP210 XPO1 NUP85 NUP98 NUP93 NUP50 NUP62 NUPL1	*	hsa-miR-142-3p (3.1e-09) hsa-miR-185 (3e-08) hsa-miR-514 (1.1e-07) hsa-miR-125a (5e-07) hsa-miR-30b (0.00053) hsa-miR-129-3p (0.0012) hsa-miR-30c (0.0027)
REACTOME_PYRUVATE_METABOLISM	LDHB PDK4		hsa-miR-15a (0.0083)
REACTOME_SEMA4D_INDUCED_CELL_MIGRATION_AND_GROWTH_CONE_COLLAPSE	RAC2 RAC1 ARHGEF11 RND1 SEMA4D ERBB2 CDC42 RHOC RHOG LIMK1		hsa-miR-206 (0.0066)
REACTOME_SEMA3A_PAK_DEPENDENT_AXON_REPULSION	FES SEMA3A FYN		hsa-miR-145 (4.1e-11) hsa-miR-92 (1.6e-05) hsa-miR-96 (0.0068)
REACTOME_GLYCOGEN_BREAKDOWN_GLYCOGENOLYSIS	GYG2 PGM1 PHKB PYGM PYGL CALM1		hsa-miR-770-5p (6.8e-05)
REACTOME_TRAFFICKING_OF_AMPA_RECEPTORS	AP2S1 CACNG4 AP2M1 AP2B1 AP2A2 AP2A1 PICK1 MDM2 CAMK2A MYO6 NSF		hsa-miR-148a (1.8e-05)
REACTOME_RNA_POLYMERASE_II_TRANSCRIPTION	TAF10 TAF13 TAF12 SSRP1 NCBP2 NCBP1 SUPT16H CTDP1 TH1L ERCC3 ERCC2 RDBP GTF2H4 GTF2H3 SUPT4H1 TCEB2 TCEB3 TCEB1 RNMT GTF2E1 TAF1 TAF4 TAF5 WHSC2 GTF2A1 NFX1 CDK7 CPSF3 CPSF2 CPSF1 U2AF2 RBM8A SFRS9 SFRS2 ELL RNGTT POLR2H POLR2G POLR2K POLR2J POLR2I POLR2D PAPOLA CSTF3 CSTF2 RNPS1 CSTF1	*	hsa-miR-496 (8.2e-11) hsa-let-7f (1.1e-09) hsa-miR-148a (3.5e-09) hsa-miR-30b (1e-06) hsa-miR-132 (1.2e-06) hsa-miR-152 (1.3e-05) hsa-miR-34a (1.4e-05) hsa-miR-1 (5.6e-05) hsa-miR-148b (8.1e-05) hsa-miR-93 (0.0083) hsa-miR-320 (0.0087) hsa-miR-155 (0.0092)
REACTOME_DEADENYLATION_OF_MRNA	PABPC1 CNOT10 RQCD1 CNOT3 CNOT6 PARN EIF4G1		hsa-miR-148a (0.0018) hsa-miR-302c (0.003) hsa-miR-186 (0.0072)
REACTOME_NEF_MEDIATES_DOWN_MODULATION_OF_CELL_SURFACE_RECEPTORS_BY_RECRUITING_THEM_TO_CLATHRIN_ADAPTERS	ARF1 AP2S1 AP2M1 AP2B1 AP2A2 PACS1 AP1S3 AP1S1 AP1G1 ATP6V1H AP1M1 AP1M2 AP1B1	*	hsa-miR-148a (3.2e-09) hsa-miR-299-3p (6.1e-09) hsa-miR-206 (1.3e-08) hsa-miR-1 (9.1e-07) hsa-miR-152 (1.9e-05) hsa-let-7f (4.5e-05) hsa-let-7b (0.00031) hsa-miR-148b (0.00076) hsa-miR-204 (0.0086) hsa-let-7a (0.0093)
REACTOME_NEURORANSMITTER_RECEPTOR_BINDING_AND_DOWNSTREAM_TRANSMISSION_IN_THE_POSTSYNAPTIC_CELL	HRAS MAPK1 GNGT1 GNGT2 AP2S1 AP2M1 CAMK4 AP2B1 PDPK1 AP2A2 PICK1 MDM2 CAMK2A GNG5 GNB2 GNB1 GNB3 RPS6KA1 ACTN2 RASGRF1 DLG3 ADCY1 CAMKK1 MYO6 PLCB3 PLCB2 NSF		hsa-miR-152 (0.0018)
REACTOME_MAPK_TARGETS_NUCLEAR_EVENTS_MEDIATED_BY_MAP_KINASES	MEF2C MEF2A JUN PPP2CB RPS6KA5 RPS6KA3 DUSP6 ATF1 PPP2R1B FOS		hsa-miR-145 (5.9e-30) hsa-miR-181c (9.1e-11) hsa-miR-92 (4.6e-06) hsa-miR-20a (4.1e-05) hsa-miR-142-5p (8.3e-05) hsa-miR-183 (0.00011) hsa-miR-543 (0.00072) hsa-miR-19b (0.00076) hsa-miR-181a (0.0026) hsa-miR-23b (0.0076)
REACTOME_ACTIVATION_OF_BH3_ONLY_PROTEINS	TFDP1 BAD BID YWHAB PMAIP1 BMF BBC3 AKT1		hsa-miR-148b (0.00059)
REACTOME_TRIACYLGLYCERIDE_BIOSYNTHESIS	GPD1 ACACB GPAM PPAP2A PPAP2B		hsa-miR-218 (4.8e-47) hsa-miR-149 (2.7e-16) hsa-miR-16 (0.0036) hsa-miR-27b (0.0048) hsa-miR-29a (0.0076) hsa-miR-15a (0.0077)
REACTOME_DOWNSTREAM_SIGNALING_OF_ACTIVATED_FGFR	FGF7 FGF9 FGF2 IRS2 IRS1 KL FGF10 FGFR1 PIK3R1		hsa-miR-145 (1.1e-22) hsa-miR-181a (2.3e-09) hsa-miR-183 (1.8e-05) hsa-miR-181b (4.4e-05) hsa-miR-16 (6e-05) hsa-miR-181c (0.00059) hsa-miR-424 (0.0012) hsa-miR-33 (0.0012) hsa-miR-92 (0.0018)
REACTOME_DOPAMINE_NEUROTRANSMITTER_RELEASE_CYCLE	SNAP25 VAMP2 DDC STXBP1 SYN2		hsa-miR-335 (1.5e-13) hsa-miR-92 (1.5e-10) hsa-miR-367 (3.9e-10) hsa-miR-25 (1.3e-08) hsa-miR-32 (5.5e-05) hsa-miR-153 (0.0001) hsa-miR-218 (0.00099)
REACTOME_ACTIVATION_OF_KAINATE_RECEPTORS_UPON_GLUTAMATE_BINDING	GNG2 GNG7 GNG13 GNG11 GRIK1 GRIK2 NCALD CALM1 PLCB1		hsa-miR-19b (2.9e-08) hsa-miR-181c (3.2e-05) hsa-miR-181a (0.00087) hsa-miR-137 (0.01)
REACTOME_CELL_DEATH_SIGNALLING_VIA_NRAGE_NRIF_AND_NADE	ARHGEF16 ARHGEF11 FGD3 PREX1 CASP3 CASP2 BAD PSENEN MAGED1 ARHGEF2 VAV2 APH1A TRIO PSEN1 PSEN2 AATF ECT2		hsa-miR-1 (0.00024)
REACTOME_SHCMEDIATED_CASCADE	FGF6 FGF9 FGF1 FGF2 SOS1 FGF10 FGFR1		hsa-miR-15a (0.00075) hsa-miR-183 (0.0029)
REACTOME_STABILIZATION_OF_P53	MDM2 RFWD2 PSMD14 PSMD13 PSMD11 PSMA6 PSMA4 PSMA3 PSMA7 PSMB4 PSMB3 PSMB2 PSMC4 PSMC2 PSMD1 PSMD2 PSMD3 PSMD4 PSMD8 PSME1 PSME2 PSME3	*	hsa-miR-802 (5.8e-41) hsa-miR-146a (1.3e-13) hsa-miR-765 (1.7e-10) hsa-miR-186 (3e-09) hsa-miR-146b (9.6e-07) hsa-miR-620 (1.4e-06) hsa-miR-555 (0.0014) hsa-miR-515-5p (0.0029) hsa-miR-30e-5p (0.0056) hsa-miR-30c (0.0078)
REACTOME_HIV_LIFE_CYCLE	RAE1 LIG1 TAF10 TAF13 TAF12 FEN1 SSRP1 NCBP2 NCBP1 CCR5 BANF1 SUPT16H SEH1L CTDP1 TH1L PPIA NUP188 CXCR4 RANBP1 TPR ERCC2 NUP155 XRCC4 RANGAP1 RDBP GTF2H4 GTF2H3 NUP205 NUP214 NUP210 TCEB2 TCEB3 TCEB1 XPO1 RNMT GTF2E1 TAF1 TAF4 TAF5 WHSC2 GTF2A1 NUP85 CDK7 NUP98 NUP93 ELL NUP50 NUP62 RNGTT POLR2H POLR2G POLR2K POLR2J POLR2I POLR2D NUPL1	*	hsa-miR-125b (4.5e-18) hsa-let-7g (1.1e-07) hsa-miR-302c (7.1e-07) hsa-let-7f (1.2e-06) hsa-miR-204 (4.5e-06) hsa-miR-320 (2.3e-05) hsa-miR-129-3p (0.00018) hsa-miR-148a (0.00025) hsa-miR-30c (0.00025) hsa-miR-153 (0.00027) hsa-let-7b (0.0005) hsa-miR-132 (0.00072) hsa-miR-34a (0.00075) hsa-miR-200a (0.0016) hsa-miR-299-3p (0.0026) hsa-miR-302a (0.0041) hsa-miR-206 (0.0048) hsa-miR-152 (0.0078)
