# Supplementary material for: Important miRs of Pathways in Different Tumor Types
Source: PLoS Comput Biol. 2013 Jan 24;9(1):e1002883. doi: 10.1371/journal.pcbi.1002883 (PMC3554575; doi:10.1371/journal.pcbi.1002883)
Supplement: Table S5 — Pairs of miR/pathways that appear in all cancer types. We show 98 pairs between 59 pathways and 27 miRs that appeared in GBMs, ovarian and breast cancers. (XLS) [file pcbi.1002883.s012.xls]

## Sheet: GBM_OV_BRCA_commonPairs.txt
Table S5: Here we show 98 pairs between 59 pathways and 27 miRs that appeared in GBMs, ovarian and breast cancers.
pathway	miR
REACTOME_PHASE_1_FUNCTIONALIZATION	hsa-miR-144
REACTOME_GTP_HYDROLYSIS_AND_JOINING_OF_THE_60S_RIBOSOMAL_SUBUNIT	hsa-miR-376a
REACTOME_ELONGATION_AND_PROCESSING_OF_CAPPED_TRANSCRIPTS	hsa-miR-212
REACTOME_CREB_PHOSPHORYLATION_THROUGH_THE_ACTIVATION_OF_CAMKII	hsa-miR-130b
REACTOME_CLASS_A1_RHODOPSIN_LIKE_RECEPTORS	hsa-miR-23b
REACTOME_PLC_GAMMA1_SIGNALLING	hsa-miR-92 hsa-miR-32 hsa-miR-19a hsa-miR-19b
REACTOME_ACTIVATION_OF_THE_PRE_REPLICATIVE_COMPLEX	hsa-miR-515-5p
REACTOME_REPAIR_SYNTHESIS_OF_PATCH_27_30_BASES_LONG_BY_DNA_POLYMERASE	hsa-miR-217 hsa-miR-154
REACTOME_NUCLEAR_RECEPTOR_TRANSCRIPTION_PATHWAY	hsa-miR-130b
REACTOME_DNA_REPAIR	hsa-miR-217 hsa-miR-154
REACTOME_HIV_INFECTION	hsa-miR-132
REACTOME_NUCLEOTIDE_EXCISION_REPAIR	hsa-miR-217
REACTOME_TRANSCRIPTION	hsa-miR-132 hsa-miR-802
REACTOME_REGULATION_OF_INSULIN_SECRETION_BY_ACETYLCHOLINE	hsa-miR-218 hsa-miR-19a hsa-miR-130a
REACTOME_DNA_STRAND_ELONGATION	hsa-miR-154 hsa-miR-217
REACTOME_LATE_PHASE_OF_HIV_LIFE_CYCLE	hsa-miR-132
REACTOME_REGULATION_OF_INSULIN_SECRETION_BY_FREE_FATTY_ACIDS	hsa-miR-301 hsa-miR-130a hsa-miR-218 hsa-miR-19a
REACTOME_METABOLISM_OF_LIPIDS_AND_LIPOPROTEINS	hsa-miR-218
REACTOME_OPIOID_SIGNALLING	hsa-miR-130a hsa-miR-218 hsa-miR-19b
REACTOME_TRANSPORT_OF_THE_SLBP_INDEPENDENT_MATURE_MRNA	hsa-miR-93
REACTOME_VIRAL_MRNA_TRANSLATION	hsa-miR-137 hsa-miR-376a hsa-miR-376b
REACTOME_INHIBITION_OF_INSULIN_SECRETION_BY_ADRENALINE_NORADRENALINE	hsa-miR-19b
REACTOME_REGULATION_OF_BETA_CELL_DEVELOPMENT	hsa-miR-376a
REACTOME_IONOTROPIC_ACTIVITY_OF_KAINATE_RECEPTORS	hsa-miR-19b
REACTOME_GPCR_LIGAND_BINDING	hsa-miR-130b
REACTOME_RNA_POLYMERASE_I_PROMOTER_CLEARANCE	hsa-miR-802 hsa-miR-132 hsa-miR-584
REACTOME_PEPTIDE_CHAIN_ELONGATION	hsa-miR-137 hsa-miR-376b hsa-miR-376a
REACTOME_G2_M_CHECKPOINTS	hsa-miR-643
REACTOME_REMOVAL_OF_THE_FLAP_INTERMEDIATE_FROM_THE_C_STRAND	hsa-miR-154
REACTOME_METABOLISM_OF_NITRIC_OXIDE	hsa-miR-770-5p
REACTOME_PLC_BETA_MEDIATED_EVENTS	hsa-miR-103 hsa-miR-32 hsa-miR-130a hsa-miR-770-5p hsa-miR-92
REACTOME_TRANSCRIPTION_COUPLED_NER	hsa-miR-217 hsa-miR-154
REACTOME_REGULATION_OF_INSULIN_SECRETION_BY_GLUCAGON_LIKE_PEPTIDE_1	hsa-miR-130a hsa-miR-19a hsa-miR-19b hsa-miR-92
REACTOME_RNA_POLYMERASE_I_III_AND_MITOCHONDRIAL_TRANSCRIPTION	hsa-miR-132
REACTOME_TRANSMISSION_ACROSS_CHEMICAL_SYNAPSES	hsa-miR-130a hsa-miR-19b hsa-miR-301
REACTOME_POLYMERASE_SWITCHING	hsa-miR-217 hsa-miR-154
REACTOME_G_ALPHA_I_SIGNALLING_EVENTS	hsa-miR-218
REACTOME_REGULATION_OF_GENE_EXPRESSION_IN_BETA_CELLS	hsa-miR-376a
REACTOME_BIOLOGICAL_OXIDATIONS	hsa-miR-130b
REACTOME_MITOTIC_M_M_G1_PHASES	hsa-miR-30b
REACTOME_G_PROTEIN_ACTIVATION	hsa-miR-485-3p
REACTOME_HIV_LIFE_CYCLE	hsa-miR-132
REACTOME_NUCLEAR_EVENTS_KINASE_AND_TRANSCRIPTION_FACTOR_ACTIVATION	hsa-miR-130b
REACTOME_INSULIN_SYNTHESIS_AND_SECRETION	hsa-miR-137
REACTOME_FORMATION_AND_MATURATION_OF_MRNA_TRANSCRIPT	hsa-miR-212
REACTOME_VPR_MEDIATED_NUCLEAR_IMPORT_OF_PICS	hsa-miR-93
REACTOME_RNA_POLYMERASE_II_TRANSCRIPTION	hsa-miR-132
REACTOME_RNA_POLYMERASE_I_PROMOTER_OPENING	hsa-miR-584
REACTOME_REMOVAL_OF_THE_FLAP_INTERMEDIATE	hsa-miR-154 hsa-miR-217
REACTOME_G_ALPHA_S_SIGNALLING_EVENTS	hsa-miR-32
REACTOME_EXTENSION_OF_TELOMERES	hsa-miR-217 hsa-miR-515-5p hsa-miR-154
REACTOME_DNA_REPLICATION_PRE_INITIATION	hsa-miR-515-5p
REACTOME_TRIACYLGLYCERIDE_BIOSYNTHESIS	hsa-miR-218
REACTOME_G_ALPHA_Q_SIGNALLING_EVENTS	hsa-miR-130a
REACTOME_INFLUENZA_VIRAL_RNA_TRANSCRIPTION_AND_REPLICATION	hsa-miR-376b hsa-miR-376a
REACTOME_FORMATION_OF_A_POOL_OF_FREE_40S_SUBUNITS	hsa-miR-376b hsa-miR-137
REACTOME_LAGGING_STRAND_SYNTHESIS	hsa-miR-154 hsa-miR-515-5p
REACTOME_CELL_CYCLE_CHECKPOINTS	hsa-miR-138
REACTOME_TELOMERE_MAINTENANCE	hsa-miR-217 hsa-miR-154 hsa-miR-515-5p
